# Supplementary material
Source: Research Square preprint supplement (doi:10.21203/rs.3.rs-9853027/v1)
Supplement: Supplementary file 1 [file 9bf32ef7a3407463e662e9bb.docx]

**Supplementary Materials**

Appendix to “Redefining the global landscape of Methicillin-resistant *Staphylococcus aureus* infection burdens: epidemiology, challenges, and future directions”

**Supplementary Methods**

**Supplementary Table 1.** Guidelines for Accurate and Transparent Health Estimates Reporting checklist.

**Supplementary Table 2.** Country-specific MRSA resistance data from national surveillance systems operating within individual countries.

**Supplementary Table 3.** Social Determinants of Health (SDoH).

**Supplementary Table 4.** Detailed descriptions of social determinants of health.

**Supplementary Table 5.** Average annual percent change of MRSA mortality rates by region and age group, 1990–2021.

**Supplementary Table 6.** Country-specific MRSA isolate proportion, mortality rates, and mortality trends, 1990−2021.

**Supplementary Table 7.** Frontier analysis of MRSA burdens across countries in 2021.

**Supplementary Table 8.** Linear mixed model analysis of factors influencing MRSA infection burdens.

**Supplementary Figure 1.** Joinpoint regression analysis of global age-specific MRSA mortality trends, 1990–2021.

**Statistical Code 1.** Frontier analysis

**Statistical Code 2.** Inequality analysis

**Statistical Code 3.** Mann-Kendall trend test and Sen’s slope estimation

**Statistical Code 4.** Linear mixed-effects model

**Statistical Code 5.** Bayesian multilevel model prediction

**Supplementary Methods**

**Database**

MICROBE (Measuring Infectious Causes and Resistance Outcomes for Burden Estimation) is an interactive visualization tool developed by IHME and Oxford University as part of the Global Burden of Disease study. It quantifies mortality, incidence, and disability‑adjusted life years (DALYs) associated with or attributable to 11 infectious syndromes, 22 bacterial pathogens, 16 antimicrobial drug classes, and 84 pathogen–drug combinations across 204 countries and territories, integrating over 520 million records from vital registration, hospital discharge, laboratory surveillance, and insurance claims. The platform offers policymakers evidence to prioritise AMR interventions and monitor temporal trends in resistance burdens.

ResistanceMap is a comprehensive web‑based platform developed by the Center for Disease Dynamics, Economics & Policy (CDDEP) that aggregates and standardises national and subnational data on AMR and antibiotic consumption worldwide. It primarily sources data from three major surveillance networks: the WHO’s Global Antimicrobial Resistance Surveillance System (GLASS), the ECDC’s European Antimicrobial Resistance Surveillance Network (EARS‑Net), and the Central Asian and European Surveillance of Antimicrobial Resistance (CAESAR). The tool enables longitudinal tracking of resistance prevalence, cross‑national comparisons, and ecological analyses examining the relationship between antibiotic use and resistance emergence, serving as a critical resource for AMR surveillance and pharmaceutical policy research.

IQVIA MIDAS (Multinational Integrated Data Analysis System) is a unique platform for assessing worldwide healthcare markets. It integrates IQVIA’s national audits into a globally consistent view of the pharmaceutical market, tracking virtually every product in 693 therapeutic classes and providing estimated product volumes, trends, and market share through retail and non‑retail channels across 77 countries. In public health research, MIDAS is extensively used to derive antibiotic consumption metrics (expressed as defined daily doses per 1,000 inhabitants per day) for evaluating antimicrobial stewardship policies and analysing consumption patterns under the WHO AWaRe classification framework.

World Bank DataBank is an open‑access repository providing longitudinal, cross‑national socioeconomic and health‑systems indicators essential for public health analyses. It encompasses metrics including GDP per capita, health expenditure, universal health coverage indices, educational attainment, governance quality, and community infrastructure. These standardized indicators are routinely integrated with AMR surveillance and pharmaceutical utilization databases to examine structural determinants of resistance, control for health‑system capacity in burden‑of‑disease studies, and conduct panel analyses across diverse economic contexts, with all data publicly available to support reproducible research globally.

**Social Determinants of Health**

Social determinants of health (SDoH) encompass the non‑medical conditions in which people are born, live, learn, work, and age, including economic stability, education access and quality, health care access and quality, neighborhood and built environment, and social and community context. These factors profoundly shape health outcomes, functioning, and quality of life. Defined by the WHO as the circumstances and structural forces shaping daily life, social determinants of health drive population health disparities by accounting for an estimated 30% to 55% of health outcomes and creating unjust, avoidable differences between social groups. Because social determinants of health operate at environmental and structural levels rather than through individual behavior alone, mitigating health inequities demands coordinated, multi‑sectoral strategies across public health, education, transportation, and housing. Consequently, Healthy People 2030 has elevated social determinants of health as a foundational priority, explicitly aiming to create social, physical, and economic environments that promote attaining the full potential for health and well‑being for all.

**Counterfactuals and AMR estimation**

Deaths attributable to resistance were derived by multiplying cause‑specific deaths, fraction related to infection, infectious syndrome fraction, fatal pathogen fraction, and the mortality population attributable fraction (PAF), as calculated below:

= )

where *DJ* represents the number of deaths for each underlying cause *J*; *SJ* is the fraction of those deaths that are related to infection for cause *J*; *MLJ* is the infectious syndrome fraction for syndrome *L* within cause *J*; *PLK* is the fatal pathogen fraction for pathogen *K* within syndrome *L*; and PAF*Kδ* is the mortality population attributable fraction for resistance profile *δ* of pathogen *K*. The PAF itself was calculated from the relative risk of death for resistant versus sensitive infections and the proportion of infections that are resistant, as follows:

PAF =

where *RR* is the relative risk of death for resistant versus sensitive infections, and is the prevalence (exposure proportion) of resistant infections.

Deaths associated with resistance were estimated using the prevalence of resistance among infection‑related deaths (specific to each pathogen, syndrome, and underlying cause) multiplied by the total number of such deaths, as calculated below:

= )

where *DJ* represents the number of deaths for each underlying cause *J*; *SJ* is the fraction of those deaths that are related to infection for cause *J*; *MLJ* is the infectious syndrome fraction for syndrome *L* within cause *J*; *PLK* is the fatal pathogen fraction for pathogen *K* within syndrome *L*; and *RKd* is fatal prevalence of resistance for drug *d* in pathogen *K.* The fatal prevalence of resistance *RKd* for a given drug *d* was derived from the non‑fatal prevalence *R'Kd* and the relative risk of death *RRKd* for the same drug, using the formula:

*RKd* =

**Joinpoint regression analysis**

To assess temporal trends in the burdens of carbapenem-resistant infections in low- and middle-income countries, we conducted joinpoint regression analysis. This method detects significant change points in temporal data by fitting piecewise linear regression models. Specifically, we modelled the natural logarithm of mortality rates as a function of calendar year, generating a series of connected linear segments. Each joinpoint represents a statistically significant change in the slope of the trend. For each segment, we calculated the annual percent change (APC) along with its 95% confidence interval (CI). Additionally, we computed the average annual percent change (AAPC), which summarises the overall trend across the entire study period (1990–2021) as a weighted average of the segment-specific APCs, with weights proportional to the length of each segment. A trend was classified as statistically significant if the 95% CI of the corresponding APC or AAPC excluded zero. The final model was selected using Monte Carlo permutation tests with 4,499 permutations to determine the optimal number of joinpoints, following the standard procedure of the NCI Joinpoint software.

**Cross-country inequality analysis**

Health inequities in the burdens of carbapenem-resistant pathogens were evaluated using the Slope Index of Inequality and the Concentration Index, two metrics widely employed in comparative health inequality research. These indices were used to quantify socioeconomic-related inequities in age-standardized DALY rates across 204 countries and territories from 1990 to 2021, with stratification by sociodemographic development level. The Slope Index of Inequality was estimated via population-weighted linear regression of the age-standardized DALY rate against the cumulative proportion of the population ranked by Socio-demographic Index (SDI), with weights equal to each country’s population share and the midpoint of each cumulative probability interval used as the independent variable. The resulting regression coefficient represents the absolute difference in predicted DALY rates between the theoretically most-advantaged and most-disadvantaged extremes of the socioeconomic distribution, accounting for the size of each national population. The Concentration Index was derived from the concentration curve, which plots the cumulative proportion of aggregate DALYs (y-axis) against the cumulative proportion of the population ranked by SDI (x-axis). The Concentration Index is computed as twice the area between the concentration curve and the diagonal line of perfect equality; for a health-damaging outcome such as DALYs, a negative value indicates disproportionate concentration of disease burdens among lower-SDI countries, whereas a positive value indicates concentration among higher-SDI countries. Standard errors for both indices were estimated using bootstrap resampling to construct 95% confidence intervals, accounting for the clustered nature of repeated observations over time. Temporal trends in absolute and relative inequality were assessed by applying these metrics to each year from 1990 to 2021, thereby capturing the evolution of cross-country disparities over the study period.

**Linear mixed-effects model**

To assess associations between antibiotic consumption, social determinants of health, and MRSA prevalence and mortality, a linear mixed-effects model was fitted to hierarchical data from 59 countries with complete observations using the R package lme4. Preliminary diagnostics confirmed the appropriateness of this approach for the nested data structure, wherein repeated measurements are clustered within countries. Country was specified as a random intercept to account for unobserved, time-invariant country-specific characteristics—such as healthcare infrastructure and cultural prescribing norms—that induce correlation among observations from the same nation and violate the independence assumption of standard regression. Following assessment of multicollinearity among the 20 candidate explanatory variables—evaluated to ensure that highly correlated predictors did not destabilize coefficient estimates or inflate standard errors—fixed effects were selected through a two-stage backward elimination procedure. In the first stage, a full model containing all candidate predictors was fitted using maximum likelihood estimation, and variables were sequentially removed to minimize the Akaike information criterion, thereby balancing goodness-of-fit with model complexity to guard against overfitting; maximum likelihood was employed here, rather than restricted maximum likelihood, because valid likelihood-ratio comparisons between nested models with differing fixed-effects structures require estimation under maximum likelihood. In the second stage, only those variables whose regression coefficients achieved statistical significance at the two-sided p < 0.05 level were retained, ensuring that each fixed effect demonstrated an independent association with the outcome after accounting for country-level clustering. The final parsimonious model was then re-estimated using restricted maximum likelihood, which adjusts for the degrees of freedom consumed in estimating fixed effects and yields unbiased estimates of the between-country variance component and residual variance, thereby providing more reliable standard errors for inferential testing.

**Bayesian hierarchical model**

To project MRSA mortality rates through 2035, we employed a Bayesian hierarchical modeling framework implemented via the brms package in R. The log-transformed mortality rate served as the response variable, and to properly propagate observation-level uncertainty into estimation, we specified a measurement-error model in which the standard deviations of the measurement errors were derived directly from the reported 95% uncertainty intervals, thereby weighting each observation in proportion to its estimated precision. Temporal dynamics were captured flexibly using a natural cubic spline of calendar year with three degrees of freedom, which permits smooth, nonlinear trends without imposing a rigid parametric functional form. The hierarchical structure accounted for demographic and geographic clustering by including random intercepts for age group—allowing baseline mortality risk to vary across age categories—and location-specific random intercepts and random linear slopes for year—permitting each geographical unit to deviate from the global temporal trend in both its baseline level and its rate of change over time. Weakly informative priors were adopted to provide gentle regularization while letting the data dominate posterior inference: Normal(0, 5) for the intercept and all fixed-effect coefficients, and Exponential(1) for the standard deviations of the random effects, bounding variances away from zero while remaining sufficiently diffuse. Posterior distributions were approximated via Hamiltonian Monte Carlo sampling, run across four independent chains with 4,000 iterations each; convergence to the stationary distribution was assessed using the potential scale reduction factor (R-hat), with values below 1.05 deemed acceptable. Projections for 2022–2035 were then generated by computing posterior predictive expectations, yielding median estimates and 95% credible intervals that fully reflect both parameter uncertainty and the hierarchical structure of the model.


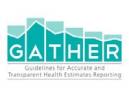


**Supplementary Table 1.** Guidelines for Accurate and Transparent Health Estimates Reporting checklist.

| **Item**  **#** | **Checklist item** | **Reported**  **on page #** |
| --- | --- | --- |
| **Objectives and funding** | | |
| **1** | Define the indicator (s), populations (including age, sex, and geographic entities), and time period (s) for which estimates were made. | Methods, P 20-22 |
| **2** | List the funding sources for the work. | Funding in the cover letter |
| **Data Inputs** | | |
| *For all data inputs from multiple sources that are synthesized as part of the study:* | | |
| **3** | Describe how the data were identified and how the data were accessed. | Methods, P 20-22 |
| **4** | Specify the inclusion and exclusion criteria. Identify all ad-hoc exclusions. | Methods, P 20-22 |
| **5** | Provide information on all included data sources and their main characteristics. For each data source used, report reference information or contact name/institution, population represented, data collection method, year (s) of data collection, sex and age range, diagnostic criteria or measurement method, and sample size, as relevant. | Methods, P 20-22 ; Supplementary methods in supplementary materials, P 2 |
| **6** | Identify and describe any categories of input data that have potentially important biases (e.g., based on characteristics listed in item 5). | N/A |
| *For data inputs that contribute to the analysis but were not synthesized as part of the study:* | | |
| **7** | Describe and give sources for any other data inputs. | N/A |
| *For all data inputs:* | | |
| **8** | Provide all data inputs in a file format from which data can be efficiently extracted (e.g., a spreadsheet rather than a PDF), including all relevant meta-data listed in item 5. For any data inputs that cannot be shared because of ethical or legal reasons, such as third-party ownership, provide a contact name or the name of the institution that retains the right to the data. | Data availability, P 26 |
| **Data analysis** | | |
| **9** | Provide a conceptual overview of the data analysis method. A diagram may be helpful. | Methods, P 20 |
| **10** | Provide a detailed description of all steps of the analysis, including mathematical formulae. This description should cover, as relevant, data cleaning, data pre-processing, data adjustments and weighting of data sources, and mathematical or statistical model (s). | Methods, P 22-26; Supplementary methods and statistical codes in supplementary materials, P 2-5 and P 39-65 |
| **11** | Describe how candidate models were evaluated and how the final model (s) were selected. | The establishment and evaluation methods of the GBD model have been detailed in previous articles. |
| **12** | Provide the results of an evaluation of model performance, if done, as well as the results of any relevant sensitivity analysis. | The establishment and evaluation methods of the GBD model have been detailed in previous articles. |
| **13** | Describe methods for calculating uncertainty of the estimates. State which sources of uncertainty were, and were not, accounted for in the uncertainty analysis. | Methods, P 22 |
| **14** | State how analytic or statistical source code used to generate estimates can be accessed. | Statistical codes in supplementary materials, P 39-65 |
| **Results and Discussion** | | |
| **15** | Provide published estimates in a file format from which data can be efficiently extracted. | Data availability, P 26; Tables in supplementary materials |
| **16** | Report a quantitative measure of the uncertainty of the estimates (e.g. uncertainty intervals). | Methods, P 22; Results, P 5-10 |
| **17** | Interpret results in light of existing evidence. If updating a previous set of estimates, describe the reasons for changes in estimates. | Discussion, P 10-15 |
| **18** | Discuss limitations of the estimates. Include a discussion of any modelling assumptions or data limitations that affect interpretation of the estimates. | Discussion, P 14-15 |

This checklist should be used in conjunction with the GATHER statement and Explanation and Elaboration document, found on gather-statement.org

**Supplementary Table 2.** Country-specific MRSA resistance data from national surveillance systems operating within individual countries.

| **Country** | **Official national surveillance platforms** |
| --- | --- |
| Australia | Australian Group on Antimicrobial Resistance (AGAR) |
| New Zealand | Public Health Surveillance unit of the Institute of Environmental Science and Research Ltd (ESR), New Zealand |
| Thailand | National Antimicrobial Resistance Surveillance Center (NARST), Thailand |
| Vietnam | Vietnam Resistance Project (VINARES) |
| Argentina | WHONET-Argentina Network and SIREVA II Argentina Network |
| Chile | Chilean Society of infectious diseases |
| Ecuador | Reference Laboratory for Antimicrobial Resistance at the National Institute of Public Health Research (INSPI), Ecuador |
| Mexico | Hospital Civil de Guadalajara (Fray Antonio Alcalde), Mexico |
| Venezuela | Programa Venezolano de Vigilancia de la Resistencia a los Antimicrobianos (PROVENRA), Venezuela |
| United Arab Emirates | United Arab Emirates Ministry of Health & Prevention |
| Canada | Canadian Antimicrobial Resistance Alliance (CARA) |
| United States of America | National Healthcare Safety Network, USA |
| India | Private laboratory network, India |
| Pakistan | Chughtai’s laboratory, Lahore (CLL), Pakistan |
| Sri Lanka | The Sri Lanka College of Microbiologists |
| Ghana | MDS-Lancet Laboratories Ghana Limited |
| Malawi | Malawi-Liverpool-Wellcome Trust Clinical Research Programme, University of Malawi College of Medicine |
| South Africa | National Health Laboratory Services and SASCM Private Data, South Africa |
| China | China Antimicrobial Resistance Surveillance System (CARSS) |

**Supplementary Table 3.** Social Determinants of Health (SDoH).

| **Dimension** | **Indicator** |
| --- | --- |
| Economic Stability | GDP per capita (current US$)  Unemployment, total (% of total labor force)  Prevalence of undernourishment (% of population) |
| Education Access and Quality | Government expenditure on education, total (% of GDP)  Individuals using the Internet (% of population) |
| Health Care Access and Quality | Current health expenditure per capita, PPP (current international $)  Physicians (per 1,000 people)  Hospital beds (per 1,000 people)  Carbapenems use (DIDs)  Cephalosporins use (DIDs)  Fluoroquinolones use (DIDs)  Broad spectrum penicillins use (DIDs) |
| Neighborhood and Built Environment | Urban population (% of total population)  PM2.5 air pollution, mean annual exposure (micrograms per cubic meter)  Forest area (% of land area)  People using safely managed drinking water services (% of population)  People using safely managed sanitation services (% of population)  Average Mean Temperature (°C) a  Relative Humidity a |
| Social and Community Context | Political Stability and Absence of Violence/Terrorism: Estimate |

a Due to the absence of an independent environmental dimension, temperature and humidity are incorporated into the Neighborhood and Built Environment dimension as physical environment control variables.

Abbreviations: DID, defined daily dose per 1,000 inhabitants per day; PPP, purchasing power parity; GDP, gross domestic product.

**Supplementary Table 4.** Detailed descriptions of social determinants of health.

| **INDICATOR_NAME** | **SOURCE_NOTE** | **SOURCE_ORGANIZATION** |
| --- | --- | --- |
| GDP per capita (current US$) | Gross domestic product is the total income earned through the production of goods and services in an economic territory during an accounting period. It can be measured in three different ways: using either the expenditure approach, the income approach, or the production approach. The core indicator has been divided by the general population to achieve a per capita estimate.This indicator is expressed in current prices, meaning no adjustment has been made to account for price changes over time. This indicator is expressed in United States dollars. | Country official statistics, National Statistical Organizations and/or Central Banks; National Accounts data files, Organisation for Economic Co-operation and Development (OECD); Staff estimates, World Bank (WB) |
| Unemployment, total (% of total labor force) (modeled ILO estimate) | Unemployment refers to the share of the labor force that is without work but available for and seeking employment. | ILO Modelled Estimates database (ILOEST), International Labour Organization (ILO) |
| Prevalence of undernourishment (% of population) | Prevalence of undernourishments is the percentage of the population whose habitual food consumption is insufficient to provide the dietary energy levels that are required to maintain a normal active and healthy life. | Food and Agriculture Organization of the United Nations (FAO) |

**Supplementary Table 4.** Detailed descriptions of social determinants of health (continued).

| **INDICATOR_NAME** | **SOURCE_NOTE** | **SOURCE_ORGANIZATION** |
| --- | --- | --- |
| Government expenditure on education, total (% of GDP) | General government expenditure on education (current, capital, and transfers) is expressed as a percentage of GDP. It includes expenditure funded by transfers from international sources to government. General government usually refers to local, regional and central governments. | Data API, UN Educational, Scientific and Cultural Organization (UNESCO) |
| Individuals using the Internet (% of population) | Internet users are individuals who have used the Internet (from any location) in the last 3 months. The Internet can be used via a computer, mobile phone, personal digital assistant, games machine, digital TV etc. | World Telecommunication/ICT Indicators Database, International Telecommunication Union (ITU) |
| Current health expenditure per capita, PPP (current international $) | Current expenditures on health per capita expressed in international dollars at purchasing power parity. | Global Health Expenditure Database, updated December 12th, 2025, World Health Organization (WHO) |
| Physicians (per 1,000 people) | Physicians include generalist and specialist medical practitioners. | Global Health Workforce Statistics, World Health Organization (WHO); Organisation for Economic Co-operation and Development (OECD); Country data |
| Hospital beds (per 1,000 people) | Hospital beds include inpatient beds available in public, private, general, and specialized hospitals and rehabilitation centers. In most cases beds for both acute and chronic care are included. | WHO data, supplemented by country data, World Health Organization (WHO) |
| Carbapenems use (DIDs) | Carbapenem consumption in a country (Defined Daily Doses per 1,000 inhabitants per day). | IQVIA MIDAS |

**Supplementary Table 4.** Detailed descriptions of social determinants of health (continued).

| **INDICATOR_NAME** | **SOURCE_NOTE** | **SOURCE_ORGANIZATION** |
| --- | --- | --- |
| Cephalosporins use (DIDs) | Cephalosporins consumption in a country (Defined Daily Doses per 1,000 inhabitants per day). | IQVIA MIDAS |
| Fluoroquinolones use (DIDs) | Fluoroquinolones consumption in a country (Defined Daily Doses per 1,000 inhabitants per day). | IQVIA MIDAS |
| Broad spectrum penicillins use (DIDs) | Broad spectrum penicillins consumption in a country (Defined Daily Doses per 1,000 inhabitants per day). | IQVIA MIDAS |
| Urban population (% of total population) | Urban population refers to people living in urban areas as defined by national statistical offices. The data are collected and smoothed by United Nations Population Division. | World Urbanization Prospects, United Nations (UN) |
| PM2.5 air pollution, mean annual exposure (micrograms per cubic meter) | Population-weighted exposure to ambient PM2.5 pollution is defined as the average level of exposure of a nation's population to concentrations of suspended particles measuring less than 2.5 microns in aerodynamic diameter, which are capable of penetrating deep into the respiratory tract and causing severe health damage. Exposure is calculated by weighting mean annual concentrations of PM2.5 by population in both urban and rural areas. | Global Burden of Disease Study 2023 (GBD 2023) Air Pollution Exposure Estimates and Risk Curves 1990-2023, Global Burden of Disease Collaborative Network |

**Supplementary Table 4.** Detailed descriptions of social determinants of health (continued).

| **INDICATOR_NAME** | **SOURCE_NOTE** | **SOURCE_ORGANIZATION** |
| --- | --- | --- |
| Forest area (% of land area) | Forest area (% of land area) is the share of total land area that is under natural or planted stands of trees of at least 5 meters in situ, whether productive or not, and excludes tree stands in agricultural production systems (for example, in fruit plantations and agroforestry systems) and trees in urban parks and gardens. | FAOSTAT, Food and Agriculture Organization of the United Nations (FAO) |
| People using safely managed drinking water services (% of population) | The percentage of people using drinking water from an improved source that is accessible on premises, available when needed and free from faecal and priority chemical contamination. Improved water sources include piped water, boreholes or tubewells, protected dug wells, protected springs, and packaged or delivered water. | WHO/UNICEF Joint Monitoring Programme (JMP) for Water Supply, Sanitation and Hygiene, World Health Organization (WHO); UN Children's Fund (UNICEF) |
| People using safely managed sanitation services (% of population) | The percentage of people using improved sanitation facilities that are not shared with other households and where excreta are safely disposed of in situ or transported and treated offsite. Improved sanitation facilities include flush/pour flush to piped sewer systems, septic tanks or pit latrines: ventilated improved pit latrines, compositing toilets or pit latrines with slabs. | WHO/UNICEF Joint Monitoring Programme (JMP) for Water Supply, Sanitation and Hygiene, World Health Organization (WHO); UN Children's Fund (UNICEF) |
| Average Mean Temperature (°C) | Average temperature over the aggregation period. | Climate Change Knowledge Portal, World Bank (WB) |

**Supplementary Table 4.** Detailed descriptions of social determinants of health (continued).

| **INDICATOR_NAME** | **SOURCE_NOTE** | **SOURCE_ORGANIZATION** |
| --- | --- | --- |
| Relative Humidity | Based on daily mean relative humidity at 2m as reported by climate models, or derived from specific humidity reported by climate models. | Climate Change Knowledge Portal, World Bank (WB) |
| Political Stability and Absence of Violence/Terrorism: Estimate | Political Stability and Absence of Violence/Terrorism measures perceptions of the likelihood of political instability and/or politically-motivated violence, including terrorism. Estimate gives the country's score on the aggregate indicator, in units of a standard normal distribution. | Worldwide Governance Indicators, World Bank (WB) |

Abbreviations: DID, defined daily dose per 1,000 inhabitants per day; PPP, purchasing power parity; GDP, gross domestic product.

**Supplementary Table 5.** Average annual percent change of MRSA mortality rates by region and age group, 1990–2021.

| **Location** | **AAPC, 95% CI** | | | | | |
| --- | --- | --- | --- | --- | --- | --- |
| **Age-standardized** | **Neonatal** | **Post neonatal to 5** | **5 to 49** | **50 to 69** | **70+** |
| Global | 0.5 (0.4, 0.6) * | -1.1 (-1.4, -0.8) * | -2.0 (-2.2, -1.8) * | 1.1 (0.9, 1.2) * | 0.7 (0.6, 0.8) * | 1.1 (1.0, 1.2) * |
| High-income Asia Pacific | -1.2 (-1.4, -1.0) * | -5.1 (-5.9, -4.4) * | -1.9 (-2.4, -1.3) * | 0.3 (-0.1, 0.6) | -0.8 (-1.1, -0.5) * | -0.3 (-0.6, 0.01) |
| High-income North America | 1.2 (0.6, 1.8) * | -0.6 (-1.1, -0.2) * | 0.3 (-0.4, 1.0) | 2.0 (1.3, 2.8) * | 1.3 (0.9, 1.6) * | 1.2 (0.6, 1.8) * |
| Western Europe | 0.04 (-0.2, 0.3) | -3.0 (-3.4, -2.7) * | -2.0 (-2.6, -1.4) * | 0.5 (0.1, 0.8) * | -0.3 (-0.5, -0.01) * | 0.7 (0.4, 0.9) * |
| Australasia | 2.0 (1.3, 2.7) * | -1.3 (-2.2, -0.3) * | 0.8 (-0.3, 2.0) | 3.2 (2.6, 3.9) * | 1.5 (0.8, 2.2) * | 2.5 (1.8, 3.3) * |
| Andean Latin America | 1.1 (0.3, 1.9) * | -2.3 (-3.1, -1.4) * | -3.2 (-3.9, -2.6) * | 1.1 (0.3, 1.8) * | 1.6 (0.8, 2.4) * | 2.0 (1.4, 2.5) * |
| Tropical Latin America | 1.6 (1.2, 2.0) * | -2.0 (-2.6, -1.3) * | -2.6 (-3.0, -2.1) * | 2.8 (2.2, 3.4) * | 2.0 (1.6, 2.4) * | 2.3 (2.0, 2.6) * |
| Central Latin America | 1.3 (1.2, 1.5) * | -0.8 (-1.2, -0.4) * | -1.3 (-1.9, -0.6) * | 2.6 (1.9, 3.3) * | 1.9 (1.3, 2.6) * | 1.6 (1.4, 1.8) * |
| Southern Latin America | 0.7 (-0.1, 1.4) | -2.8 (-3.7, -1.8) * | -2.7 (-3.7, -1.8) * | 1.0 (0.4, 1.7) * | 0.5 (-0.1, 1.2) | 1.3 (0.5, 2.1) * |
| Caribbean | 1.3 (0.7, 1.9) * | 0.9 (0.6, 1.2) * | -0.2 (-0.7, 0.2) | 1.9 (1.2, 2.6) * | 1.6 (1.1, 2.2) * | 1.7 (0.9, 2.5) * |
| Central Europe | 0.3 (-0.3, 0.9) | -4.5 (-5.2, -3.7) * | -3.7 (-4.3, -3.0) * | 1.1 (0.2, 2.0) * | 0.9 (0.4, 1.3) * | 0.5 (0.01, 1.0) * |
| Eastern Europe | 2.4 (1.1, 3.7) * | -1.3 (-2.0, -0.6) * | -0.6 (-1.3, 0.1) | 4.8 (3.2, 6.5) * | 3.0 (1.5, 4.6) * | 2.2 (0.8, 3.7) * |
| Central Asia | 0.4 (-0.1, 0.9) | -1.3 (-1.7, -0.8) * | -2.0 (-2.2, -1.7) * | 1.7 (1.0, 2.3) * | 0.6 (0.1, 1.0) * | 1.0 (0.3, 1.6) * |
| North Africa and Middle East | 0.9 (0.7, 1.0) * | -2.7 (-2.9, -2.4) * | -2.6 (-2.8, -2.3) * | 1.4 (0.3, 2.5) * | 1.1 (0.7, 1.5) * | 1.5 (1.3, 1.7) * |
| South Asia | 0.1 (-0.4, 0.6) | -1.5 (-2.0, -0.9) * | -2.4 (-2.7, -2.0) * | -0.4 (-0.8, 0.1) | 0.2 (-0.1, 0.5) | 1.0 (0.2, 1.9) * |
| Southeast Asia | 1.5 (1.3, 1.8) * | -0.6 (-0.8, -0.3) * | -1.5 (-1.8, -1.3) * | 1.8 (1.4, 2.1) * | 1.8 (1.7, 1.9) * | 2.1 (1.8, 2.4) * |

**Supplementary Table 5.** Average annual percent change of MRSA mortality rates by region and age group, 1990–2021 (continued).

| **Location** | **AAPC, 95% CI** | | | | | |
| --- | --- | --- | --- | --- | --- | --- |
| **Age-standardized** | **Neonatal** | **Post neonatal to 5** | **5 to 49** | **50 to 69** | **70+** |
| East Asia | -0.04 (-0.7, 0.6) | -4.7 (-5.3, -4.2) * | -4.9 (-6.1, -3.7) * | 1.9 (1.5, 2.3) * | 0.2 (-0.1, 0.5) | 0.8 (0.5, 1.2) * |
| Oceania | 0.6 (0.2, 1.0) * | 0.1 (-0.3, 0.5) | -0.3 (-0.8, 0.3) | 1.0 (0.3, 1.6) * | 0.5 (-0.1, 1.0) | 1.0 (0.5, 1.4) * |
| Western Sub-Saharan Africa | 0.3 (-0.3, 0.9) | -0.4 (-1.3, 0.6) | -1.6 (-2.2, -1.1) * | -0.01 (-0.6, 0.6) | 0.2 (-0.3, 0.7) | 0.8 (0.2, 1.4) * |
| Eastern Sub-Saharan Africa | 0.8 (0.5, 1.2) * | -0.3 (-0.6, 0.1) | -2.1 (-2.7, -1.5) * | -0.03 (-0.6, 0.5) | 0.7 (0.4, 1.1) * | 1.5 (1.2, 1.7) * |
| Central Sub-Saharan Africa | 0.7 (-0.01, 1.5) | -1.0 (-2.2, 0.2) | -3.0 (-4.4, -1.7) * | 0.7 (0.02, 1.4) * | 0.8 (0.1, 1.4) * | 1.3 (0.5, 2.0) * |
| Southern Sub-Saharan Africa | 1.1 (0.7, 1.5) * | -1.2 (-1.6, -0.7) * | -1.4 (-2.3, -0.5) * | 0.7 (-0.01, 1.5) | 1.6 (1.1, 2.1) * | 1.2 (0.8, 1.7) * |

Abbreviation: AAPC, average annual percent change.

* P < 0.05.

**Supplementary Table 6.** Country-specific MRSA isolate proportion, mortality rates, and mortality trends, 1990−2021.

| **Location** | **% Resistance (invasive isolates) in 2021, 95% CI** | **Death rate per 100,000 in 2021, 95% UI** | **AAPC (%) from 1990 to 2021, 95% CI** |
| --- | --- | --- | --- |
| Afghanistan | NA | 2.86 (1.97, 3.75) | 1.20 (0.40, 2.00) * |
| Albania | NA | 0.86 (0.29, 1.42) | 0.10 (-1.10, 1.30) |
| Algeria | NA | 2.06 (1.33, 2.79) | 0.90 (0.50, 1.40) * |
| American Samoa | NA | 1.85 (0.75, 2.95) | 2.10 (1.60, 2.60) * |
| Andorra | NA | 0.55 (0.12, 0.98) | -0.80 (-1.50, -0.10) * |
| Angola | NA | 0.26 (0.07, 0.45) | 1.60 (1.20, 2.00) * |
| Antigua and Barbuda | NA | 1.93 (0.85, 3.01) | 2.40 (1.30, 3.50) * |
| Argentina | 34 (32, 36) | 2.94 (2.43, 3.44) | 1.40 (0.50, 2.30) * |
| Armenia | 29 | 1.08 (0.36, 1.80) | 0.00 (-0.30, 0.30) |
| Australia | 17 (16, 18) | 0.85 (0.67, 1.02) | 1.90 (1.10, 2.70) * |
| Austria | 3 (2, 4) | 1.06 (0.77, 1.35) | 2.80 (1.70, 3.90) * |
| Azerbaijan | NA | 0.67 (0.18, 1.16) | 0.10 (-0.60, 0.80) |
| Bahamas | NA | 1.62 (0.66, 2.58) | 1.70 (0.70, 2.70) * |
| Bahrain | NA | 2.42 (1.55, 3.30) | 1.10 (0.50, 1.80) * |
| Bangladesh | NA | 1.58 (0.99, 2.17) | 0.20 (-2.00, 2.40) |
| Barbados | NA | 1.82 (0.74, 2.90) | 1.00 (-0.10, 2.20) |
| Belarus | 30 | 1.04 (0.58, 1.49) | 2.50 (1.60, 3.40) * |
| Belgium | 4 (3, 5) | 1.35 (0.94, 1.76) | 1.20 (0.60, 1.70) * |
| Belize | NA | 1.55 (0.69, 2.41) | 2.50 (1.90, 3.20) * |
| Benin | NA | 2.58 (1.70, 3.47) | 2.30 (1.80, 2.80) * |
| Bermuda | NA | 0.85 (0.28, 1.42) | -1.10 (-1.60, -0.60) * |
| Bhutan | NA | 0.83 (0.35, 1.31) | 0.70 (0.20, 1.20) * |
| Bolivia (Plurinational State of) | NA | 2.89 (1.81, 3.97) | 3.30 (2.70, 3.80) * |
| Bosnia and Herzegovina | 21 (13, 31) | 0.70 (0.43, 0.96) | 0.50 (-1.60, 2.60) |
| Botswana | NA | 0.42 (0.13, 0.71) | -2.20 (-2.80, -1.70) * |
| Brazil | 7 (5, 10) | 1.30 (0.88, 1.72) | 1.50 (1.10, 1.90) * |
| Brunei Darussalam | 15 (11, 19) | 0.75 (0.37, 1.13) | 0.60 (0.20, 1.10) * |
| Bulgaria | 15 (11, 20) | 0.65 (0.34, 0.95) | -2.80 (-3.80, -1.70) * |
| Burkina Faso | 51 (36, 65) | 0.62 (0.09, 1.15) | 1.10 (-0.40, 2.60) |
| Burundi | NA | 1.28 (0.29, 2.26) | 1.10 (0.60, 1.50) * |
| Cabo Verde | NA | 1.04 (0.27, 1.81) | 1.10 (0.40, 1.90) * |
| Cambodia | NA | 2.02 (1.27, 2.76) | 3.90 (2.30, 5.50) * |
| Cameroon | 45 (28, 62) | 1.39 (0.66, 2.11) | 0.00 (-0.40, 0.40) |
| Canada | NA | 0.75 (0.40, 1.09) | 0.20 (-0.40, 0.80) |
| Central African Republic | NA | 2.45 (1.69, 3.21) | 0.90 (0.40, 1.40) * |
| Chad | NA | 1.74 (0.68, 2.80) | 1.20 (0.80, 1.60) * |

**Supplementary Table 6.** Country-specific MRSA isolate proportion, mortality rates, and mortality trends, 1990−2021 (continued).

| **Location** | **% Resistance (invasive isolates) in 2021, 95% CI** | **Death rate per 100,000 in 2021, 95% UI** | **AAPC (%) from 1990 to 2021, 95% CI** |
| --- | --- | --- | --- |
| Chile | NA | 1.42 (0.86, 1.98) | -1.50 (-2.10, -0.90) * |
| China | 29.4 | 1.44 (0.98, 1.89) | -0.01 (-0.70, 0.70) |
| Colombia | 45 (43, 47) | 1.46 (1.11, 1.81) | 0.80 (0.20, 1.40) * |
| Comoros | NA | 1.45 (0.38, 2.52) | 0.80 (0.30, 1.40) * |
| Congo | NA | 3.00 (1.97, 4.04) | 0.80 (0.20, 1.40) * |
| Cook Islands | NA | 1.44 (0.51, 2.38) | 0.20 (0.01, 0.50) * |
| Costa Rica | NA | 1.62 (1.06, 2.18) | 1.40 (1.00, 1.80) * |
| Côte d'Ivoire | NA | 1.00 (0.36, 1.63) | -0.50 (-1.00, -0.02) * |
| Croatia | 67 (49, 82) | 1.14 (0.80, 1.48) | -0.80 (-1.60, -0.01) * |
| Cuba | NA | 1.87 (1.05, 2.68) | 1.70 (0.80, 2.60) * |
| Cyprus | 43 (36, 50) | 1.83 (1.38, 2.29) | -2.40 (-3.00, -1.80) * |
| Czechia | 9 (8, 10) | 0.62 (0.44, 0.80) | 1.50 (0.80, 2.20) * |
| Democratic People’s Republic of Korea | NA | 1.72 (0.79, 2.64) | 1.50 (-1.50, 4.50) |
| Democratic Republic of the Congo | 100 (90, 101) | 1.63 (0.83, 2.43) | 0.90 (-0.40, 2.20) |
| Denmark | 2 (2, 3) | 0.13 (0.09, 0.17) | -0.30 (-0.80, 0.20) |
| Djibouti | NA | 1.24 (0.31, 2.17) | 1.70 (1.40, 2.00) * |
| Dominica | NA | 2.14 (0.98, 3.29) | 2.00 (1.30, 2.70) * |
| Dominican Republic | NA | 1.83 (1.36, 2.29) | 2.00 (1.10, 2.80) * |
| Ecuador | NA | 1.42 (0.88, 1.96) | 2.30 (1.30, 3.20) * |
| Egypt | 92 (78, 98) | 3.91 (2.97, 4.85) | 0.50 (0.20, 0.90) * |
| El Salvador | NA | 1.86 (1.34, 2.39) | 1.50 (0.60, 2.30) * |
| Equatorial Guinea | NA | 1.71 (0.70, 2.72) | 0.60 (-0.20, 1.30) |
| Eritrea | NA | 1.05 (0.22, 1.88) | 0.20 (-4.40, 5.00) |
| Estonia | 2 (1, 4) | 0.20 (0.11, 0.30) | -0.90 (-1.20, -0.50) * |
| Eswatini | NA | 0.73 (0.25, 1.21) | 1.80 (1.10, 2.40) * |
| Ethiopia | 59 (50, 67) | 1.51 (0.97, 2.05) | -0.10 (-0.80, 0.60) |
| Fiji | NA | 1.67 (1.06, 2.28) | 2.90 (2.00, 3.90) * |
| Finland | 2 (1, 3) | 0.08 (0.06, 0.10) | -1.40 (-2.00, -0.80) * |
| France | 11 (10, 12) | 1.10 (0.78, 1.42) | 0.40 (0.10, 0.60) * |
| Gabon | NA | 2.00 (0.94, 3.06) | 1.40 (0.10, 2.60) * |
| Gambia | NA | 1.29 (0.31, 2.28) | 0.30 (-0.50, 1.10) |
| Georgia | 25 (19, 32) | 0.68 (0.36, 0.99) | -1.50 (-2.70, -0.20) * |
| Germany | 5 (5, 5) | 0.34 (0.25, 0.43) | -0.50 (-1.90, 0.90) |
| Ghana | 45 (32, 58) | 1.30 (0.70, 1.89) | 0.90 (0.50, 1.30) * |
| Greece | 5 (5, 5) | 1.61 (1.20, 2.01) | 0.10 (-0.40, 0.60) |
| Greenland | NA | 1.09 (0.37, 1.81) | -0.80 (-1.10, -0.50) * |
| Grenada | NA | 2.12 (0.87, 3.37) | 2.10 (1.50, 2.80) * |

**Supplementary Table 6.** Country-specific MRSA isolate proportion, mortality rates, and mortality trends, 1990−2021 (continued).

| **Location** | **% Resistance (invasive isolates) in 2021, 95% CI** | **Death rate per 100,000 in 2021, 95% UI** | **AAPC (%) from 1990 to 2021, 95% CI** |
| --- | --- | --- | --- |
| Guam | NA | 0.57 (0.20, 0.93) | -1.40 (-2.50, -0.20) * |
| Guatemala | NA | 2.04 (1.45, 2.62) | -1.10 (-1.50, -0.70) * |
| Guinea | NA | 1.72 (0.59, 2.85) | 0.70 (-0.10, 1.50) |
| Guinea-Bissau | NA | 2.21 (0.88, 3.54) | 1.40 (0.30, 2.50) * |
| Guyana | NA | 2.03 (0.98, 3.09) | 1.60 (0.80, 2.40) * |
| Haiti | NA | 1.37 (0.69, 2.05) | 0.80 (0.50, 1.00) * |
| Honduras | NA | 2.04 (1.35, 2.74) | 4.90 (4.30, 5.60) * |
| Hungary | 19 (17, 21) | 1.52 (1.09, 1.94) | 2.50 (2.10, 3.00) * |
| Iceland | 1 (0, 5) | 0.52 (0.09, 0.95) | -1.20 (-2.10, -0.30) * |
| India | 56 (55, 57) | 1.92 (1.56, 2.28) | -0.01 (-0.30, 0.30) |
| Indonesia | 38 (34, 42) | 1.81 (1.28, 2.34) | 2.20 (0.60, 3.80) * |
| Iran (Islamic Republic of) | 33 (28, 38) | 1.75 (1.32, 2.18) | -0.10 (-0.60, 0.30) |
| Iraq | 85 (71, 94) | 2.77 (2.27, 3.27) | 0.70 (-0.10, 1.40) |
| Ireland | 11 (9, 14) | 0.57 (0.32, 0.81) | -4.20 (-5.00, -3.50) * |
| Israel | NA | 1.37 (0.92, 1.83) | 0.70 (-0.10, 1.50) |
| Italy | 31 (30, 32) | 1.27 (0.95, 1.60) | 0.70 (0.30, 1.10) * |
| Jamaica | NA | 1.41 (0.57, 2.25) | 1.90 (0.80, 3.00) * |
| Japan | 35 (34, 36) | 1.06 (0.86, 1.27) | -1.30 (-2.40, -0.30) * |
| Jordan | 71 (62, 79) | 1.72 (1.26, 2.18) | 0.60 (-0.10, 1.20) |
| Kazakhstan | NA | 1.49 (0.54, 2.44) | 1.40 (0.20, 2.80) * |
| Kenya | 44 (28, 60) | 1.28 (0.73, 1.83) | 1.30 (-0.01, 2.60) |
| Kiribati | NA | 1.46 (0.54, 2.38) | 1.30 (0.40, 2.20) * |
| Kuwait | NA | 1.29 (0.94, 1.63) | 0.30 (-1.90, 2.50) |
| Kyrgyzstan | NA | 0.75 (0.23, 1.27) | -0.30 (-0.80, 0.10) |
| Lao People’s Democratic Republic | 30 (21, 40) | 0.40 (0.21, 0.59) | 0.70 (-0.20, 1.50) |
| Latvia | 5 (3, 7) | 0.31 (0.17, 0.45) | -3.40 (-4.50, -2.40) * |
| Lebanon | 37 (24, 52) | 0.91 (0.37, 1.44) | 1.80 (0.60, 2.90) * |
| Lesotho | NA | 0.39 (0.10, 0.67) | 1.70 (1.10, 2.30) * |
| Liberia | 6 (1, 19) | 1.24 (0.35, 2.13) | -0.40 (-1.20, 0.30) |
| Libya | NA | 1.82 (0.99, 2.65) | 4.10 (3.40, 4.90) * |
| Lithuania | 9 (7, 11) | 0.41 (0.29, 0.53) | 0.10 (-1.00, 1.10) |
| Luxembourg | 6 (3, 10) | 0.37 (0.22, 0.53) | -2.30 (-2.80, -1.80) * |
| Madagascar | NA | 1.06 (0.60, 1.52) | 3.50 (2.60, 4.40) * |
| Malawi | 40 (25, 56) | 2.05 (1.22, 2.89) | 1.40 (1.00, 1.80) * |
| Malaysia | 16 (15, 17) | 2.04 (1.61, 2.47) | 0.70 (0.01, 1.40) * |
| Maldives | NA | 0.70 (0.19, 1.20) | -1.40 (-1.60, -1.20) * |
| Mali | 2 (0, 10) | 1.08 (0.40, 1.75) | -1.90 (-2.80, -1.10) * |

**Supplementary Table 6.** Country-specific MRSA isolate proportion, mortality rates, and mortality trends, 1990−2021 (continued).

| **Location** | **% Resistance (invasive isolates) in 2021, 95% CI** | **Death rate per 100,000 in 2021, 95% UI** | **AAPC (%) from 1990 to 2021, 95% CI** |
| --- | --- | --- | --- |
| Malta | 20 (13, 29) | 1.32 (0.95, 1.69) | -0.50 (-1.20, 0.20) |
| Marshall Islands | NA | 1.91 (0.83, 3.00) | 1.70 (1.20, 2.10) * |
| Mauritania | NA | 1.24 (0.49, 2.00) | 0.10 (-0.30, 0.50) |
| Mauritius | 43 (38, 48) | 1.23 (0.42, 2.03) | 0.90 (-0.20, 2.00) |
| Mexico | NA | 1.42 (0.94, 1.89) | 0.90 (0.20, 1.60) * |
| Micronesia (Federated States of) | NA | 1.25 (0.39, 2.11) | 0.80 (0.10, 1.50) * |
| Monaco | NA | 0.67 (0.13, 1.21) | 0.10 (-0.30, 0.40) |
| Mongolia | NA | 2.52 (1.87, 3.17) | 1.00 (0.10, 1.90) * |
| Montenegro | 21 | 1.39 (0.83，1.95) | 1.90 (1.40, 2.40) * |
| Morocco | 26 (18, 35) | 0.60 (0.37，0.84) | -0.50 (-1.40, 0.40) |
| Mozambique | 25 (12, 42) | 1.63 (0.91，2.34) | 1.20 (0.80, 1.60) * |
| Myanmar | NA | 2.64 (2.09，3.19) | 0.40 (-0.20, 1.00) |
| Namibia | NA | 0.86 (0.11，1.61) | -0.30 (-0.40, -0.10) * |
| Nauru | NA | 2.16 (0.79，3.53) | 1.80 (1.50, 2.10) * |
| Nepal | 58 (45, 70) | 1.60 (1.06，2.13) | -0.04 (-1.50, 1.40) |
| Netherlands | 2 (1, 3) | 0.30 (0.22，0.38) | 4.10 (3.60, 4.60) * |
| New Zealand | NA | 0.53 (0.38，0.67) | 2.30 (1.80, 2.90) * |
| Nicaragua | NA | 1.23 (0.69，1.78) | 1.50 (0.60, 2.40) * |
| Niger | NA | 1.55 (0.52，2.59) | 0.20 (-0.60, 1.10) |
| Nigeria | 67 (49, 82) | 1.99 (1.42，2.57) | 0.30 (-1.20, 1.80) |
| Niue | NA | 1.89 (0.68，3.11) | 1.80 (1.30, 2.30) * |
| North Macedonia | 81 (64, 92) | 2.71 (2.03，3.38) | 1.90 (1.40, 2.50) * |
| Northern Mariana Islands | NA | 1.13 (0.40，1.87) | 0.10 (-0.20, 0.40) |
| Norway | 1 (1, 2) | 0.15 (0.03，0.26) | -2.10 (-2.50, -1.70) * |
| Oman | 41 (27, 56) | 1.65 (1.00，2.30) | 2.50 (1.60, 3.50) * |
| Pakistan | 83 (77, 88) | 2.03 (1.61，2.44) | 1.20 (0.90, 1.40) * |
| Palau | NA | 1.86 (0.68，3.04) | 1.40 (0.80, 2.10) * |
| Palestine | 73 (70, 76) | 2.56 (1.91，3.21) | 1.00 (0.30, 1.60) * |
| Panama | NA | 1.07 (0.71，1.44) | 1.60 (1.20, 2.10) * |
| Papua New Guinea | NA | 0.98 (0.29，1.67) | 0.20 (-0.30, 0.60) |
| Paraguay | NA | 2.21 (1.47，2.95) | 4.20 (3.20, 5.30) * |
| Peru | 82 (71, 90) | 2.71 (1.82，3.60) | 0.60 (-0.40, 1.60) |
| Philippines | 45 (42, 48) | 2.65 (2.11，3.20) | 1.40 (0.50, 2.20) * |
| Poland | 17 (15, 19) | 1.26 (0.90，1.62) | 0.00 (-0.80, 0.80) |
| Portugal | 25 (23, 27) | 1.90 (1.40，2.39) | 1.20 (0.20, 2.20) * |
| Puerto Rico | NA | 1.17 (0.49，1.86) | 0.04 (-0.30, 0.40) |
| Qatar | 32 (25, 40) | 2.03 (1.43，2.63) | -0.10 (-1.00, 0.70) |

**Supplementary Table 6.** Country-specific MRSA isolate proportion, mortality rates, and mortality trends, 1990−2021 (continued).

| **Location** | **% Resistance (invasive isolates) in 2021, 95% CI** | **Death rate per 100,000 in 2021, 95% UI** | **AAPC (%) from 1990 to 2021, 95% CI** |
| --- | --- | --- | --- |
| Republic of Korea | 45 (42, 49) | 1.55 (1.17，1.93) | -0.50 (-0.80, -0.10) * |
| Republic of Moldova | 7 (1, 21) | 1.25 (0.65，1.84) | 2.30 (0.10, 4.60) * |
| Romania | 41 (37, 46) | 2.15 (1.58，2.72) | 0.60 (-0.30, 1.50) |
| Russian Federation | 17 (14, 21) | 1.30 (0.86，1.74) | 2.20 (0.50, 4.00) * |
| Rwanda | NA | 3.24 (2.08，4.41) | 0.20 (-0.50, 0.80) |
| Saint Kitts and Nevis | NA | 2.12 (0.89，3.34) | 1.60 (1.10, 2.10) * |
| Saint Lucia | NA | 1.74 (0.77，2.70) | 0.80 (0.30, 1.30) * |
| Saint Vincent and the Grenadines | NA | 2.01 (0.91，3.11) | 1.90 (1.10, 2.70) * |
| Samoa | NA | 1.51 (0.56，2.46) | 1.60 (1.20, 2.00) * |
| San Marino | NA | 0.41 (0.08，0.73) | -1.80 (-2.50, -1.10) * |
| Sao Tome and Principe | NA | 1.42 (0.35，2.49) | 1.10 (-0.20, 2.40) |
| Saudi Arabia | 50 (44, 56) | 2.17 (1.63, 2.71) | 2.40 (1.80, 3.00) * |
| Senegal | NA | 1.48 (0.56, 2.41) | -0.50 (-1.10, 0.20) |
| Serbia | 36 | 1.88 (1.24, 2.51) | 0.70 (0.10, 1.30) * |
| Seychelles | NA | 1.68 (0.59, 2.77) | 1.90 (1.00, 2.80) * |
| Sierra Leone | NA | 1.45 (0.45, 2.46) | 0.10 (-1.30, 1.50) |
| Singapore | 33 (27, 40) | 0.78 (0.53, 1.03) | 2.30 (1.50, 3.10) * |
| Slovakia | 22 (19, 26) | 1.01 (0.65, 1.37) | 0.60 (-0.10, 1.20) |
| Slovenia | 8 (6, 10) | 0.53 (0.31, 0.74) | -1.50 (-2.30, -0.80) * |
| Solomon Islands | NA | 1.46 (0.42, 2.49) | 1.10 (0.80, 1.40) * |
| Somalia | NA | 2.29 (1.45, 3.12) | 0.70 (0.30, 1.20) * |
| South Africa | 17 (16, 18) | 1.66 (1.10, 2.23) | 0.90 (0.50, 1.40) * |
| South Sudan |  | 1.29 (0.27, 2.31) | 0.80 (0.40, 1.10) * |
| Spain | 24 (22, 26) | 1.39 (0.97, 1.81) | 1.10 (0.60, 1.70) * |
| Sri Lanka | 47 (41, 53) | 1.94 (1.33, 2.54) | 1.50 (0.60, 2.50) * |
| Sudan | 36 (21, 54) | 1.52 (1.02, 2.02) | 2.40 (1.90, 3.00) * |
| Suriname | NA | 1.36 (0.54, 2.19) | 1.50 (0.10, 3.00) * |
| Sweden | 2 (2, 2) | 0.08 (0.06, 0.10) | -1.30 (-2.00, -0.60) * |
| Switzerland | 4 (3, 5) | 0.21 (0.16, 0.26) | -0.70 (-0.90, -0.40) * |
| Syrian Arab Republic | NA | 2.40 (1.53, 3.28) | 2.00 (0.20, 3.90) * |
| Taiwan (Province of China) | NA | 2.09 (1.63, 2.55) | -0.70 (-1.10, -0.30) * |
| Tajikistan | NA | 0.91 (0.29, 1.53) | 0.90 (0.30, 1.50) * |
| Thailand | 8 (6, 10) | 1.38 (0.89, 1.87) | 1.60 (0.90, 2.40) * |
| Timor-Leste | 38 (22, 56) | 1.03 (0.26, 1.79) | 1.10 (0.40, 1.80) * |
| Togo | NA | 1.10 (0.35, 1.85) | 1.30 (0.80, 1.70) * |
| Tokelau | NA | 1.53 (0.56, 2.51) | 1.20 (0.40, 2.10) * |

**Supplementary Table 6.** Country-specific MRSA isolate proportion, mortality rates, and mortality trends, 1990−2021 (continued).

| **Location** | **% Resistance (invasive isolates) in 2021, 95% CI** | **Death rate per 100,000 in 2021, 95% UI** | **AAPC (%) from 1990 to 2021, 95% CI** |
| --- | --- | --- | --- |
| Tonga | NA | 1.59 (0.50, 2.68) | 1.90 (1.00, 2.80) * |
| Trinidad and Tobago | NA | 1.62 (0.70, 2.53) | 0.70 (0.40, 0.90) * |
| Tunisia | 17 (13, 22) | 0.94 (0.50, 1.38) | -0.30 (-0.80, 0.20) |
| Türkiye | 31 (29, 33) | 1.73 (1.21, 2.25) | 1.60 (0.90, 2.40) * |
| Turkmenistan | NA | 1.05 (0.30, 1.81) | 0.90 (0.30, 1.50) * |
| Tuvalu | NA | 1.25 (0.36, 2.14) | 0.30 (-0.40, 1.00) |
| Uganda | NA | 1.13 (0.61, 1.66) | 0.20 (-0.30, 0.80) |
| Ukraine | 28 (22, 35) | 1.03 (0.63, 1.43) | 3.20 (1.80, 4.60) * |
| United Arab Emirates | 36 (32, 40) | 1.67 (1.05, 2.29) | 1.30 (-1.10, 3.70) |
| United Kingdom | 7 (6, 8) | 0.61 (0.36, 0.86) | -2.50 (-3.20, -1.90) * |
| United Republic of Tanzania | 65 (61, 68) | 0.30 (0.04, 0.56) | 3.30 (2.70, 4.00) * |
| United States of America | NA | 2.04 (1.61, 2.48) | 1.30 (0.70, 1.90) * |
| United States Virgin Islands | NA | 1.15 (0.55, 1.75) | 0.00 (-0.80, 0.80) |
| Uruguay | NA | 2.17 (1.20, 3.14) | 0.70 (0.50, 1.00) * |
| Uzbekistan | NA | 0.80 (0.26, 1.35) | 0.50 (-0.20, 1.20) |
| Vanuatu | NA | 1.07 (0.34, 1.80) | 0.80 (0.50, 1.00) * |
| Venezuela (Bolivarian Republic of) | NA | 2.27 (1.64, 2.89) | 5.70 (5.00, 6.30) * |
| Viet Nam | NA | 1.91 (1.31, 2.50) | 2.00 (1.40, 2.60) * |
| Yemen | NA | 1.73 (0.85, 2.61) | 1.00 (0.60, 1.50) * |
| Zambia | 69 (57, 79) | 2.18 (1.29, 3.07) | 1.50 (1.10, 2.00) * |
| Zimbabwe | NA | 1.37 (0.30, 2.43) | 1.60 (1.10, 2.10) * |

Abbreviation: NA, not available.

* P < 0.05

**Supplementary Table 7.** Frontier analysis of MRSA burdens across countries in 2021.

| **Location_name** | **SDI** | **Age-standardized DALY Rate in 2021 (per 100,000)** | **Frontier value (per 100,000)** | **Efficiency Difference** | **Trend** |
| --- | --- | --- | --- | --- | --- |
| Rwanda | 0.435588706 | 93.67953389 | 4.315903615 | 89.36363027 | Decrease |
| Afghanistan | 0.337199998 | 92.99829338 | 4.319418014 | 88.67887537 | Increase |
| Egypt | 0.606787094 | 89.79704586 | 4.330779678 | 85.46626618 | Decrease |
| Myanmar | 0.53390084 | 85.77427569 | 4.302056869 | 81.47221882 | Decrease |
| Benin | 0.373486574 | 83.44792658 | 4.311977762 | 79.13594882 | Increase |
| Central African Republic | 0.30916769 | 81.9608191 | 4.305301789 | 77.65551731 | Increase |
| Congo | 0.583075236 | 80.25238711 | 4.301165066 | 75.95122204 | Increase |
| Iraq | 0.662626231 | 77.41830099 | 4.310774566 | 73.10752642 | Decrease |
| Bolivia (Plurinational State of) | 0.599010799 | 77.26583219 | 4.299431047 | 72.96640114 | Increase |
| Pakistan | 0.504028689 | 73.1916414 | 4.290098627 | 68.90154277 | Increase |
| Nigeria | 0.503390833 | 73.15439106 | 4.301822823 | 68.85256824 | Decrease |
| Mongolia | 0.617621565 | 72.41206454 | 4.29581938 | 68.11624516 | Decrease |
| Philippines | 0.651219329 | 72.39449728 | 4.323131596 | 68.07136568 | Increase |
| Peru | 0.662054037 | 71.02959533 | 4.296028669 | 66.73356666 | Decrease |
| Venezuela (Bolivarian Republic of) | 0.596513059 | 68.13607435 | 4.307674479 | 63.82839987 | Increase |
| Argentina | 0.723122973 | 67.84400691 | 4.315812162 | 63.52819475 | Increase |
| Dominica | 0.746967185 | 66.21021785 | 4.30432281 | 61.90589504 | Increase |
| Niue | 0.72622205 | 65.52873404 | 4.327577657 | 61.20115638 | Increase |
| Zambia | 0.505948954 | 64.17900022 | 4.319314857 | 59.85968536 | Increase |
| Guinea-Bissau | 0.353109621 | 63.25927459 | 4.284123647 | 58.97515094 | Increase |
| Malawi | 0.384553634 | 61.46106881 | 4.289153946 | 57.17191486 | Increase |
| Palestine | 0.631011665 | 60.41731541 | 4.302768901 | 56.11454651 | Increase |
| Guatemala | 0.539972424 | 60.22067575 | 4.306372464 | 55.91430329 | Decrease |
| Saudi Arabia | 0.815143493 | 57.76114225 | 1.978924009 | 55.78221824 | Increase |
| Dominican Republic | 0.619388201 | 59.88033061 | 4.303472856 | 55.57685775 | Increase |
| Nauru | 0.625177834 | 59.5572924 | 4.298408838 | 55.25888356 | Increase |
| India | 0.575401649 | 58.68973904 | 4.311702426 | 54.37803661 | Decrease |
| Tokelau | 0.686425621 | 58.52651533 | 4.284829123 | 54.24168621 | Increase |
| Guyana | 0.650812335 | 58.47315311 | 4.294519686 | 54.17863342 | Increase |
| Paraguay | 0.635718099 | 57.8959682 | 4.321571634 | 53.57439657 | Increase |
| Romania | 0.768453864 | 55.77350347 | 2.584649935 | 53.18885354 | Increase |
| Syrian Arab Republic | 0.623004075 | 56.73188329 | 4.331471759 | 52.40041153 | Increase |

**Supplementary Table 7.** Frontier analysis of MRSA burdens across countries in 2021 (continued).

| **Location_name** | **SDI** | **Age-standardized DALY Rate in 2021 (per 100,000)** | **Frontier value (per 100,000)** | **Efficiency Difference** | **Trend** |
| --- | --- | --- | --- | --- | --- |
| Guinea | 0.336401293 | 55.96262849 | 4.291177446 | 51.67145104 | Decrease |
| Grenada | 0.668993028 | 55.51693963 | 4.304658945 | 51.21228069 | Increase |
| Saint Vincent and the Grenadines | 0.637195963 | 55.30039639 | 4.294985298 | 51.00541109 | Increase |
| United States of America | 0.862448354 | 52.61766739 | 1.882269353 | 50.73539804 | Increase |
| Yemen | 0.450376375 | 54.58605201 | 4.312901647 | 50.27315036 | Increase |
| North Macedonia | 0.750629703 | 54.2346721 | 4.305907629 | 49.92876447 | Increase |
| Cambodia | 0.473621491 | 54.2127296 | 4.289659451 | 49.92307015 | Increase |
| Saint Kitts and Nevis | 0.754987055 | 53.45471207 | 4.300916571 | 49.1537955 | Increase |
| Barbados | 0.746748764 | 53.43251886 | 4.324425997 | 49.10809286 | Increase |
| Uruguay | 0.719283445 | 53.00771378 | 4.298435934 | 48.70927785 | Increase |
| El Salvador | 0.563775188 | 52.97620063 | 4.31250608 | 48.66369455 | Increase |
| Gabon | 0.634691393 | 51.72997434 | 4.294204228 | 47.43577011 | Increase |
| Marshall Islands | 0.574091128 | 51.43481926 | 4.295662973 | 47.13915629 | Increase |
| Taiwan (Province of China) | 0.874747053 | 48.87825135 | 1.876523971 | 47.00172738 | Decrease |
| Honduras | 0.513037248 | 51.30639726 | 4.328099402 | 46.97829786 | Increase |
| Bahamas | 0.805020668 | 48.52136197 | 2.028728253 | 46.49263372 | Increase |
| South Africa | 0.679626598 | 50.26098601 | 4.295181214 | 45.9658048 | Increase |
| Bahrain | 0.753043204 | 50.22093939 | 4.29047038 | 45.93046901 | Increase |
| Libya | 0.725771399 | 50.11481998 | 4.307203864 | 45.80761612 | Increase |
| Ethiopia | 0.358823295 | 50.08277327 | 4.289001204 | 45.79377207 | Decrease |
| Mozambique | 0.326462614 | 50.06453465 | 4.302339238 | 45.76219541 | Increase |
| Trinidad and Tobago | 0.768763254 | 48.14626925 | 2.583614995 | 45.56265426 | Increase |
| American Samoa | 0.723727533 | 49.65769282 | 4.293996377 | 45.36369644 | Increase |
| Chad | 0.240436019 | 61.88464717 | 16.6052261 | 45.27942107 | Increase |
| Antigua and Barbuda | 0.749886887 | 49.49793864 | 4.284753211 | 45.21318543 | Increase |
| Sierra Leone | 0.358665881 | 48.85165113 | 4.307817094 | 44.54383404 | Decrease |
| Qatar | 0.846860584 | 46.06874635 | 1.927137007 | 44.14160934 | Increase |
| Indonesia | 0.656868336 | 47.9096438 | 4.32886871 | 43.58077509 | Increase |

**Supplementary Table 7.** Frontier analysis of MRSA burdens across countries in 2021 (continued).

| **Location_name** | **SDI** | **Age-standardized DALY Rate in 2021 (per 100,000)** | **Frontier value (per 100,000)** | **Efficiency Difference** | **Trend** |
| --- | --- | --- | --- | --- | --- |
| Algeria | 0.659500924 | 47.89203172 | 4.321886521 | 43.5701452 | Decrease |
| Palau | 0.754046931 | 47.63146601 | 4.288916238 | 43.34254977 | Increase |
| Saint Lucia | 0.672509735 | 47.53948168 | 4.302909263 | 43.23657242 | Increase |
| Bangladesh | 0.492420885 | 47.28539871 | 4.321911582 | 42.96348713 | Decrease |
| Sri Lanka | 0.701534935 | 47.2503533 | 4.305831084 | 42.94452222 | Increase |
| Malaysia | 0.742523828 | 46.78670984 | 4.323640664 | 42.46306918 | Increase |
| Viet Nam | 0.627933721 | 46.66975203 | 4.327682224 | 42.34206981 | Increase |
| Democratic Republic of the Congo | 0.383179849 | 46.60554832 | 4.307911428 | 42.29763689 | Increase |
| Sudan | 0.541949735 | 46.39748428 | 4.320058712 | 42.07742557 | Increase |
| South Sudan | 0.278371125 | 46.3405596 | 4.348971468 | 41.99158813 | Increase |
| Equatorial Guinea | 0.657857456 | 46.25648723 | 4.320295862 | 41.93619137 | Decrease |
| Suriname | 0.633665739 | 46.23911231 | 4.310537782 | 41.92857453 | Increase |
| Jordan | 0.725307227 | 46.16601724 | 4.327903224 | 41.83811402 | Increase |
| Haiti | 0.448278285 | 46.07768129 | 4.292574475 | 41.78510681 | Increase |
| Nepal | 0.433174635 | 45.40626329 | 4.300249571 | 41.10601372 | Decrease |
| Costa Rica | 0.700340477 | 44.96465968 | 4.320830623 | 40.64382906 | Increase |
| Fiji | 0.675051631 | 44.56159246 | 4.308046108 | 40.25354635 | Increase |
| Serbia | 0.792416294 | 41.79641328 | 2.483022593 | 39.31339069 | Increase |
| Comoros | 0.475978688 | 43.51756585 | 4.292574013 | 39.22499184 | Increase |
| Senegal | 0.408054193 | 43.55292736 | 4.33339501 | 39.21953235 | Decrease |
| Belize | 0.610229002 | 42.70231338 | 4.311473868 | 38.39083951 | Increase |
| Kiribati | 0.527186583 | 42.72370645 | 4.335227304 | 38.38847915 | Increase |
| Jamaica | 0.683263064 | 42.61336708 | 4.320098922 | 38.29326816 | Increase |
| Cuba | 0.668729864 | 42.2658032 | 4.296997868 | 37.96880533 | Increase |
| Iran (Islamic Republic of) | 0.697207398 | 41.93093453 | 4.317819105 | 37.61311543 | Decrease |
| Colombia | 0.655442913 | 41.92283952 | 4.322457304 | 37.60038222 | Increase |
| Zimbabwe | 0.473819486 | 41.62487452 | 4.292815189 | 37.33205933 | Increase |
| Cameroon | 0.479691223 | 41.62758612 | 4.298963629 | 37.32862249 | Decrease |
| Democratic People's Republic of Korea | 0.569854634 | 41.44399459 | 4.306059798 | 37.13793479 | Increase |
| Türkiye | 0.712692673 | 41.36917162 | 4.287027282 | 37.08214434 | Increase |
| Oman | 0.773391602 | 39.56845062 | 2.584549946 | 36.98390067 | Increase |
| Seychelles | 0.730150775 | 40.58479918 | 4.306527911 | 36.27827127 | Increase |

**Supplementary Table 7.** Frontier analysis of MRSA burdens across countries in 2021 (continued).

| **Location_name** | **SDI** | **Age-standardized DALY Rate in 2021 (per 100,000)** | **Frontier value (per 100,000)** | **Efficiency Difference** | **Trend** |
| --- | --- | --- | --- | --- | --- |
| Mexico | 0.664575304 | 40.30722027 | 4.313545761 | 35.99367451 | Increase |
| Hungary | 0.790754768 | 38.3227901 | 2.48788237 | 35.83490773 | Increase |
| Tonga | 0.626349936 | 40.0463714 | 4.29533533 | 35.75103607 | Increase |
| Russian Federation | 0.808536005 | 36.88946217 | 2.001612102 | 34.88785007 | Increase |
| Republic of Moldova | 0.732214875 | 39.12447492 | 4.309220106 | 34.81525481 | Increase |
| Portugal | 0.744151851 | 39.08666402 | 4.302072961 | 34.78459106 | Increase |
| Kazakhstan | 0.725144495 | 38.75019529 | 4.309342004 | 34.44085329 | Increase |
| Nicaragua | 0.523958472 | 38.59221356 | 4.297764155 | 34.2944494 | Increase |
| Samoa | 0.593392769 | 38.44278353 | 4.29445181 | 34.14833172 | Increase |
| Thailand | 0.682547933 | 38.44042338 | 4.296871747 | 34.14355163 | Increase |
| Burundi | 0.289374365 | 37.93905093 | 4.306642463 | 33.63240847 | Increase |
| Cyprus | 0.835630545 | 35.47143427 | 1.928847103 | 33.54258717 | Decrease |
| Solomon Islands | 0.429360316 | 37.82752744 | 4.312624976 | 33.51490246 | Increase |
| Mali | 0.268579941 | 37.83755658 | 4.363106312 | 33.47445027 | Decrease |
| Cook Islands | 0.779109955 | 36.00162666 | 2.58489614 | 33.41673052 | Increase |
| Liberia | 0.352442452 | 37.5263422 | 4.318138165 | 33.20820403 | Decrease |
| Turkmenistan | 0.682160776 | 37.36308858 | 4.297438139 | 33.06565044 | Increase |
| Niger | 0.168072774 | 50.0912756 | 17.30189482 | 32.78938078 | Decrease |
| Ghana | 0.56493039 | 37.02697196 | 4.302997482 | 32.72397448 | Decrease |
| Puerto Rico | 0.825525847 | 34.23694198 | 1.930609564 | 32.30633242 | Increase |
| Ecuador | 0.661017053 | 36.5452504 | 4.294003431 | 32.25124697 | Increase |
| United States Virgin Islands | 0.821830853 | 33.8952118 | 1.977909254 | 31.91730255 | Increase |
| Republic of Korea | 0.886675267 | 33.64830226 | 1.87046377 | 31.77783849 | Decrease |
| Gambia | 0.40971416 | 35.95732684 | 4.315085868 | 31.64224097 | Decrease |
| Chile | 0.771514716 | 34.02865859 | 2.582365437 | 31.44629315 | Decrease |
| United Arab Emirates | 0.849317734 | 32.72480217 | 1.934963052 | 30.78983912 | Increase |
| Mauritius | 0.718260446 | 35.05324345 | 4.307423423 | 30.74582003 | Increase |
| Greece | 0.791854408 | 33.15957305 | 2.47909672 | 30.68047633 | Decrease |
| Israel | 0.809011652 | 32.61252292 | 2.01246514 | 30.60005778 | Increase |
| Kenya | 0.523768077 | 34.84769595 | 4.314784408 | 30.53291154 | Increase |
| Uganda | 0.423261181 | 34.71282369 | 4.327195974 | 30.38562772 | Decrease |
| Djibouti | 0.487958371 | 34.67345738 | 4.307967348 | 30.36549003 | Increase |
| Brazil | 0.653043887 | 34.17289449 | 4.296829432 | 29.87606506 | Increase |

**Supplementary Table 7.** Frontier analysis of MRSA burdens across countries in 2021 (continued).

| **Location_name** | **SDI** | **Age-standardized DALY Rate in 2021 (per 100,000)** | **Frontier value (per 100,000)** | **Efficiency Difference** | **Trend** |
| --- | --- | --- | --- | --- | --- |
| Mauritania | 0.4989451 | 33.95092378 | 4.282905333 | 29.66801845 | Decrease |
| Malta | 0.801585034 | 31.71670341 | 2.114381105 | 29.60232231 | Decrease |
| Kuwait | 0.846651055 | 31.43510754 | 1.932042531 | 29.50306501 | Decrease |
| Sao Tome and Principe | 0.505413747 | 33.34433145 | 4.283078601 | 29.06125285 | Increase |
| Panama | 0.708864828 | 33.01466668 | 4.296589069 | 28.71807761 | Increase |
| Tuvalu | 0.576620529 | 33.00892626 | 4.319531027 | 28.68939523 | Decrease |
| Madagascar | 0.400246943 | 32.91944774 | 4.309159431 | 28.61028831 | Increase |
| China | 0.72162976 | 32.4888255 | 4.303502315 | 28.18532318 | Decrease |
| Micronesia (Federated States of) | 0.587534967 | 32.36187647 | 4.318768584 | 28.04310789 | Increase |
| Belgium | 0.853654016 | 29.5694058 | 1.9307879 | 27.6386179 | Increase |
| Tajikistan | 0.541511187 | 31.93055799 | 4.318990476 | 27.61156751 | Increase |
| Poland | 0.812042809 | 29.57340981 | 2.004691202 | 27.56871861 | Decrease |
| Ukraine | 0.760773913 | 30.27473206 | 2.766436281 | 27.50829578 | Increase |
| Spain | 0.769283698 | 29.88376239 | 2.58248982 | 27.30127257 | Increase |
| Togo | 0.408533695 | 31.55786426 | 4.28240836 | 27.2754559 | Decrease |
| Papua New Guinea | 0.417797443 | 31.39163867 | 4.30105496 | 27.09058371 | Decrease |
| Côte d'Ivoire | 0.425941883 | 31.23610064 | 4.328226132 | 26.90787451 | Decrease |
| Italy | 0.805773534 | 28.75402533 | 2.02644661 | 26.72757872 | Increase |
| Montenegro | 0.795800584 | 28.90702966 | 2.250209832 | 26.65681983 | Increase |
| Belarus | 0.784484711 | 28.89941142 | 2.585161159 | 26.31425026 | Increase |
| Eritrea | 0.403863943 | 29.75685276 | 4.280168412 | 25.47668435 | Decrease |
| Timor-Leste | 0.444667619 | 29.67349715 | 4.294565464 | 25.37893169 | Decrease |
| Northern Mariana Islands | 0.771535213 | 27.4521297 | 2.58604975 | 24.86607995 | Increase |
| Armenia | 0.701833194 | 29.0765082 | 4.282248728 | 24.79425947 | Decrease |
| Vanuatu | 0.473100706 | 28.63954213 | 4.281252594 | 24.35828954 | Increase |
| Greenland | 0.826210336 | 25.96660683 | 1.930987724 | 24.03561911 | Decrease |
| Croatia | 0.798341027 | 25.68526867 | 2.202189756 | 23.48307891 | Decrease |
| France | 0.838364875 | 25.19466142 | 1.930422979 | 23.26423844 | Increase |
| Uzbekistan | 0.662621694 | 27.23952152 | 4.297886595 | 22.94163492 | Decrease |
| Slovakia | 0.81061053 | 24.63063581 | 2.014363957 | 22.61627185 | Increase |
| Austria | 0.853837004 | 24.0163144 | 1.935024236 | 22.08129016 | Increase |
| Japan | 0.871241813 | 23.16209969 | 1.880799535 | 21.28130015 | Decrease |
| Cabo Verde | 0.533534539 | 24.49686282 | 4.291551722 | 20.2053111 | Decrease |
| Namibia | 0.617564872 | 23.70446814 | 4.305748756 | 19.39871938 | Decrease |

**Supplementary Table 7.** Frontier analysis of MRSA burdens across countries in 2021 (continued).

| **Location_name** | **SDI** | **Age-standardized DALY Rate in 2021 (per 100,000)** | **Frontier value (per 100,000)** | **Efficiency Difference** | **Trend** |
| --- | --- | --- | --- | --- | --- |
| Kyrgyzstan | 0.603979328 | 23.40278922 | 4.32360022 | 19.079189 | Decrease |
| Bermuda | 0.821365422 | 21.05068803 | 1.973320759 | 19.07736727 | Decrease |
| Bhutan | 0.473062378 | 23.1024156 | 4.333290911 | 18.76912469 | Decrease |
| Tunisia | 0.682432216 | 22.94359043 | 4.303765076 | 18.63982535 | Decrease |
| Azerbaijan | 0.694851274 | 22.77954553 | 4.303590548 | 18.47595498 | Decrease |
| Australia | 0.844252814 | 19.81534093 | 1.92992699 | 17.88541394 | Increase |
| Eswatini | 0.585459713 | 22.03900739 | 4.305033626 | 17.73397376 | Increase |
| Guam | 0.803982203 | 19.67418898 | 2.003670966 | 17.67051801 | Decrease |
| Lebanon | 0.744746351 | 20.73551154 | 4.315052861 | 16.42045868 | Increase |
| Canada | 0.87317068 | 18.2471486 | 1.880699989 | 16.36644861 | Increase |
| Burkina Faso | 0.285118402 | 20.1915259 | 4.310481071 | 15.88104483 | Increase |
| Albania | 0.706849791 | 19.74529194 | 4.311726692 | 15.43356525 | Decrease |
| Brunei Darussalam | 0.810234367 | 16.8456472 | 1.997517704 | 14.8481295 | Increase |
| Monaco | 0.908262831 | 15.46384194 | 1.762927183 | 13.70091476 | Increase |
| Georgia | 0.732473604 | 18.01154027 | 4.322607968 | 13.6889323 | Decrease |
| Maldives | 0.650886627 | 17.61312074 | 4.295043813 | 13.31807693 | Decrease |
| Bulgaria | 0.768150939 | 15.8085384 | 2.584698485 | 13.22383992 | Decrease |
| Singapore | 0.856097766 | 14.97607789 | 1.929261842 | 13.04681605 | Increase |
| Czechia | 0.828450433 | 14.2342592 | 1.930212265 | 12.30404693 | Increase |
| Bosnia and Herzegovina | 0.723077893 | 16.11309329 | 4.291747514 | 11.82134578 | Decrease |
| United Kingdom | 0.859000182 | 12.96438332 | 1.922174507 | 11.04220881 | Decrease |
| Morocco | 0.562698301 | 14.72034778 | 4.304580269 | 10.41576751 | Decrease |
| Slovenia | 0.842430731 | 12.25682131 | 1.932385761 | 10.32443555 | Decrease |
| Andorra | 0.869444113 | 12.05290551 | 1.884990254 | 10.16791526 | Decrease |
| New Zealand | 0.849442499 | 11.93635675 | 1.927494881 | 10.00886187 | Increase |
| Ireland | 0.87375385 | 11.87323455 | 1.880587015 | 9.992647535 | Decrease |
| Iceland | 0.87636168 | 11.19235236 | 1.87975432 | 9.31259804 | Decrease |
| Lithuania | 0.856484049 | 10.91368842 | 1.932449109 | 8.981239311 | Increase |
| Botswana | 0.642721629 | 12.39701508 | 4.318953244 | 8.078061836 | Decrease |
| Somalia | 0.077688109 | 77.46123698 | 69.4454849 | 8.015752084 | Increase |
| Lesotho | 0.510393066 | 12.30948918 | 4.305796966 | 8.003692214 | Increase |
| Lao People's Democratic Republic | 0.489136091 | 12.04521059 | 4.303575094 | 7.741635496 | Decrease |
| San Marino | 0.888005474 | 9.252085649 | 1.752739452 | 7.499346197 | Decrease |
| Latvia | 0.830663516 | 8.571282476 | 1.932701084 | 6.638581392 | Decrease |

**Supplementary Table 7.** Frontier analysis of MRSA burdens across countries in 2021 (continued).

| **Location_name** | **SDI** | **Age-standardized DALY Rate in 2021 (per 100,000)** | **Frontier value (per 100,000)** | **Efficiency Difference** | **Trend** |
| --- | --- | --- | --- | --- | --- |
| Germany | 0.902957091 | 7.652960801 | 1.769954422 | 5.883006379 | Decrease |
| Luxembourg | 0.884428955 | 7.584490918 | 1.879474337 | 5.705016581 | Decrease |
| United Republic of Tanzania | 0.446568273 | 9.254263236 | 4.311904279 | 4.942358957 | Increase |
| Netherlands | 0.888464256 | 6.067542189 | 1.752065146 | 4.315477043 | Increase |
| Estonia | 0.844917787 | 5.391324848 | 1.932873087 | 3.458451761 | Decrease |
| Angola | 0.453721949 | 7.654963107 | 4.306874853 | 3.348088254 | Increase |
| Switzerland | 0.933059111 | 4.270332035 | 1.749756282 | 2.520575753 | Decrease |
| Norway | 0.91613281 | 2.853804417 | 1.757944246 | 1.095860171 | Decrease |
| Denmark | 0.896424204 | 2.646242917 | 1.755626257 | 0.89061666 | Decrease |
| Finland | 0.859831368 | 1.856076112 | 1.856076112 | 0 | Decrease |
| Sweden | 0.886880299 | 1.708040634 | 1.708040634 | 0 | Decrease |

Abbreviation: SDI, Socio-demographic Index.

**Supplementary Table 8.** Linear mixed model analysis of factors influencing MRSA infection burdens.

| **Term** | **Estimate** | **Std. Error** | **t / z value** | **df** | **p-value** | **95% CI** |
| --- | --- | --- | --- | --- | --- | --- |
| Mortality rate associated with MRSA | | | | | | |
| (Intercept) | 13.836 | 2.094 | 6.606 | 145.929 | 6.873e-10 | (9.697, 17.975) |
| Current health expenditure per capita, PPP (current international $) | -0.00038 | 9.870e-05 | -3.855 | 537.088 | 0.00013 | (-0.00057, -0.00019) |
| Physicians (per 1,000 pop) | -0.245 | 0.107 | -2.276 | 641.377 | 0.023 | (-0.456, -0.034) |
| Hospital beds (per 1,000 pop) | 0.180 | 0.083 | 2.165 | 476.398 | 0.031 | (0.017, 0.343) |
| Carbapenems use (DIDs) | 0.024 | 0.006 | 4.148 | 634.805 | 3.806e-05 | (0.013, 0.036) |
| Cephalosporins use (DIDs) | 0.00050 | 0.00018 | 2.752 | 636.591 | 0.006 | (0.00014, 0.00085) |
| Fluoroquinolones use (DIDs) | -0.00076 | 0.00034 | -2.273 | 620.881 | 0.023 | (-0.0014, -0.0001038) |
| Urban population (% of total population) | 0.075 | 0.020 | 3.679 | 171.253 | 0.00031 | (0.035, 0.116) |
| Forest area (% of land area) | -0.070 | 0.022 | -3.195 | 56.465 | 0.0023 | (-0.114, -0.026) |

**Supplementary Table 8.** Linear mixed model analysis of factors influencing MRSA infection burdens (continued).

| **Term** | **Estimate** | **Std. Error** | **t / z value** | **df** | **p-value** | **95% CI** |
| --- | --- | --- | --- | --- | --- | --- |
| PM2.5 air pollution, mean annual exposure (micrograms per cubic meter) | 0.042 | 0.017 | 2.394 | 538.576 | 0.017 | (0.008, 0.076) |
| People using safely managed drinking water services (% of pop) | -0.066 | 0.018 | -3.680 | 419.971 | 0.00026 | (-0.101, -0.031) |
| People using safely managed sanitation services (% of pop) | -0.038 | 0.009 | -4.197 | 643.684 | 3.085e-05 | (-0.056, -0.020) |
| Individuals using the internet (% of pop) | -0.014 | 0.006 | -2.252 | 643.935 | 0.025 | (-0.026, -0.002) |
| Government expenditure on education, total (% of GDP) | -0.267 | 0.078 | -3.438 | 633.237 | 0.0006 | (-0.420, -0.115) |
| Mortality rate attributable to MRSA | | | | | | |
| (Intercept) | 3.405 | 0.517 | 6.579 | 162.952 | 6.154e-10 | (2.383, 4.426) |

**Supplementary Table 8.** Linear mixed model analysis of factors influencing MRSA infection burdens (continued).

| **Term** | **Estimate** | **Std. Error** | **t / z value** | **df** | **p-value** | **95% CI** |
| --- | --- | --- | --- | --- | --- | --- |
| Current health expenditure per capita, PPP (current international $) | -7.18e-05 | 1.943e-05 | -3.697 | 633.637 | 0.00024 | (-0.00011, -3.368e-05) |
| Physicians (per 1,000 pop) | -0.060 | 0.025 | -2.438 | 633.054 | 0.015 | (-0.109, -0.012) |
| Hospital beds (per 1,000 pop) | 0.041 | 0.018 | 2.234 | 427.004 | 0.026 | (0.005, 0.077) |
| Carbapenems use (DIDs) | 0.006 | 0.001 | 4.344 | 631.542 | 1.630e-05 | (0.003, 0.009) |
| Cephalosporins use (DIDs) | 0.00015 | 4.177e-05 | 3.485 | 631.381 | 0.00053 | (6.354e-05, 0.00023) |
| Fluoroquinolones use (DIDs) | -0.0002 | 7.537e-05 | -2.358 | 623.408 | 0.019 | (-0.0003, -2.972e-05) |
| Urban population (% of total population) | 0.023 | 0.005 | 4.682 | 218.364 | 4.984e-06 | (0.014, 0.033) |
| Forest area (% of land area) | -0.020 | 0.006 | -3.643 | 54.645 | 0.0006 | (-0.031, -0.009) |

**Supplementary Table 8.** Linear mixed model analysis of factors influencing MRSA infection burdens (continued).

| **Term** | **Estimate** | **Std. Error** | **t / z value** | **df** | **p-value** | **95% CI** |
| --- | --- | --- | --- | --- | --- | --- |
| PM2.5 air pollution, mean annual exposure (micrograms per cubic meter) | 0.015 | 0.004 | 3.667 | 619.188 | 0.0003 | (0.007, 0.022) |
| People using safely managed drinking water services (% of pop) | -0.022 | 0.004 | -5.086 | 391.455 | 5.670e-07 | (-0.030, -0.013) |
| People using safely managed sanitation services (% of pop) | -0.008 | 0.002 | -3.979 | 645.245 | 7.708e-05 | (-0.012, -0.004) |
| Government expenditure on education, total (% of GDP) | -0.067 | 0.019 | -3.576 | 637.312 | 0.0004 | (-0.103, -0.030) |
| % Resistance (invasive isolates) | | | | | | |
| (Intercept) | 51.443 | 11.618 | 4.428 | 100.443 | 2.426e-05 | (28.394, 74.492) |
| Carbapenems use (DIDs) | 0.114 | 0.039 | 2.899 | 416.214 | 0.004 | (0.037, 0.191) |
| Cephalosporins use (DIDs) | 0.005 | 0.001 | 4.659 | 367.418 | 4.449e-06 | (0.003, 0.007) |

**Supplementary Table 8.** Linear mixed model analysis of factors influencing MRSA infection burdens (continued).

| **Term** | **Estimate** | **Std. Error** | **t / z value** | **df** | **p-value** | **95% CI** |
| --- | --- | --- | --- | --- | --- | --- |
| Average mean temperature (℃) | 0.472 | 0.218 | 2.164 | 89.320 | 0.033 | (0.039, 0.906) |
| PM2.5 air pollution, mean annual exposure (micrograms per cubic meter) | 0.346 | 0.135 | 2.568 | 186.543 | 0.011 | (0.080, 0.612) |
| People using safely managed drinking water services (% of pop) | -0.350 | 0.106 | -3.309 | 105.580 | 0.0013 | (-0.560, -0.140) |
| Individuals using the internet (% of pop) | -0.115 | 0.030 | -3.787 | 338.323 | 0.0002 | (-0.174, -0.055) |
| Government expenditure on education, total (% of GDP) | -2.369 | 0.641 | -3.699 | 383.008 | 0.0002 | (-3.629, -1.110) |
| Prevalence of undernourishment (% of pop) | 1.335 | 0.633 | 2.109 | 169.797 | 0.036 | (0.085, 2.585) |

Abbreviations: DID, defined daily dose per 1,000 inhabitants per day; PPP, purchasing power parity; GDP, gross domestic product.

Only predictors with p-values less than 0.05 were retained in the final models.


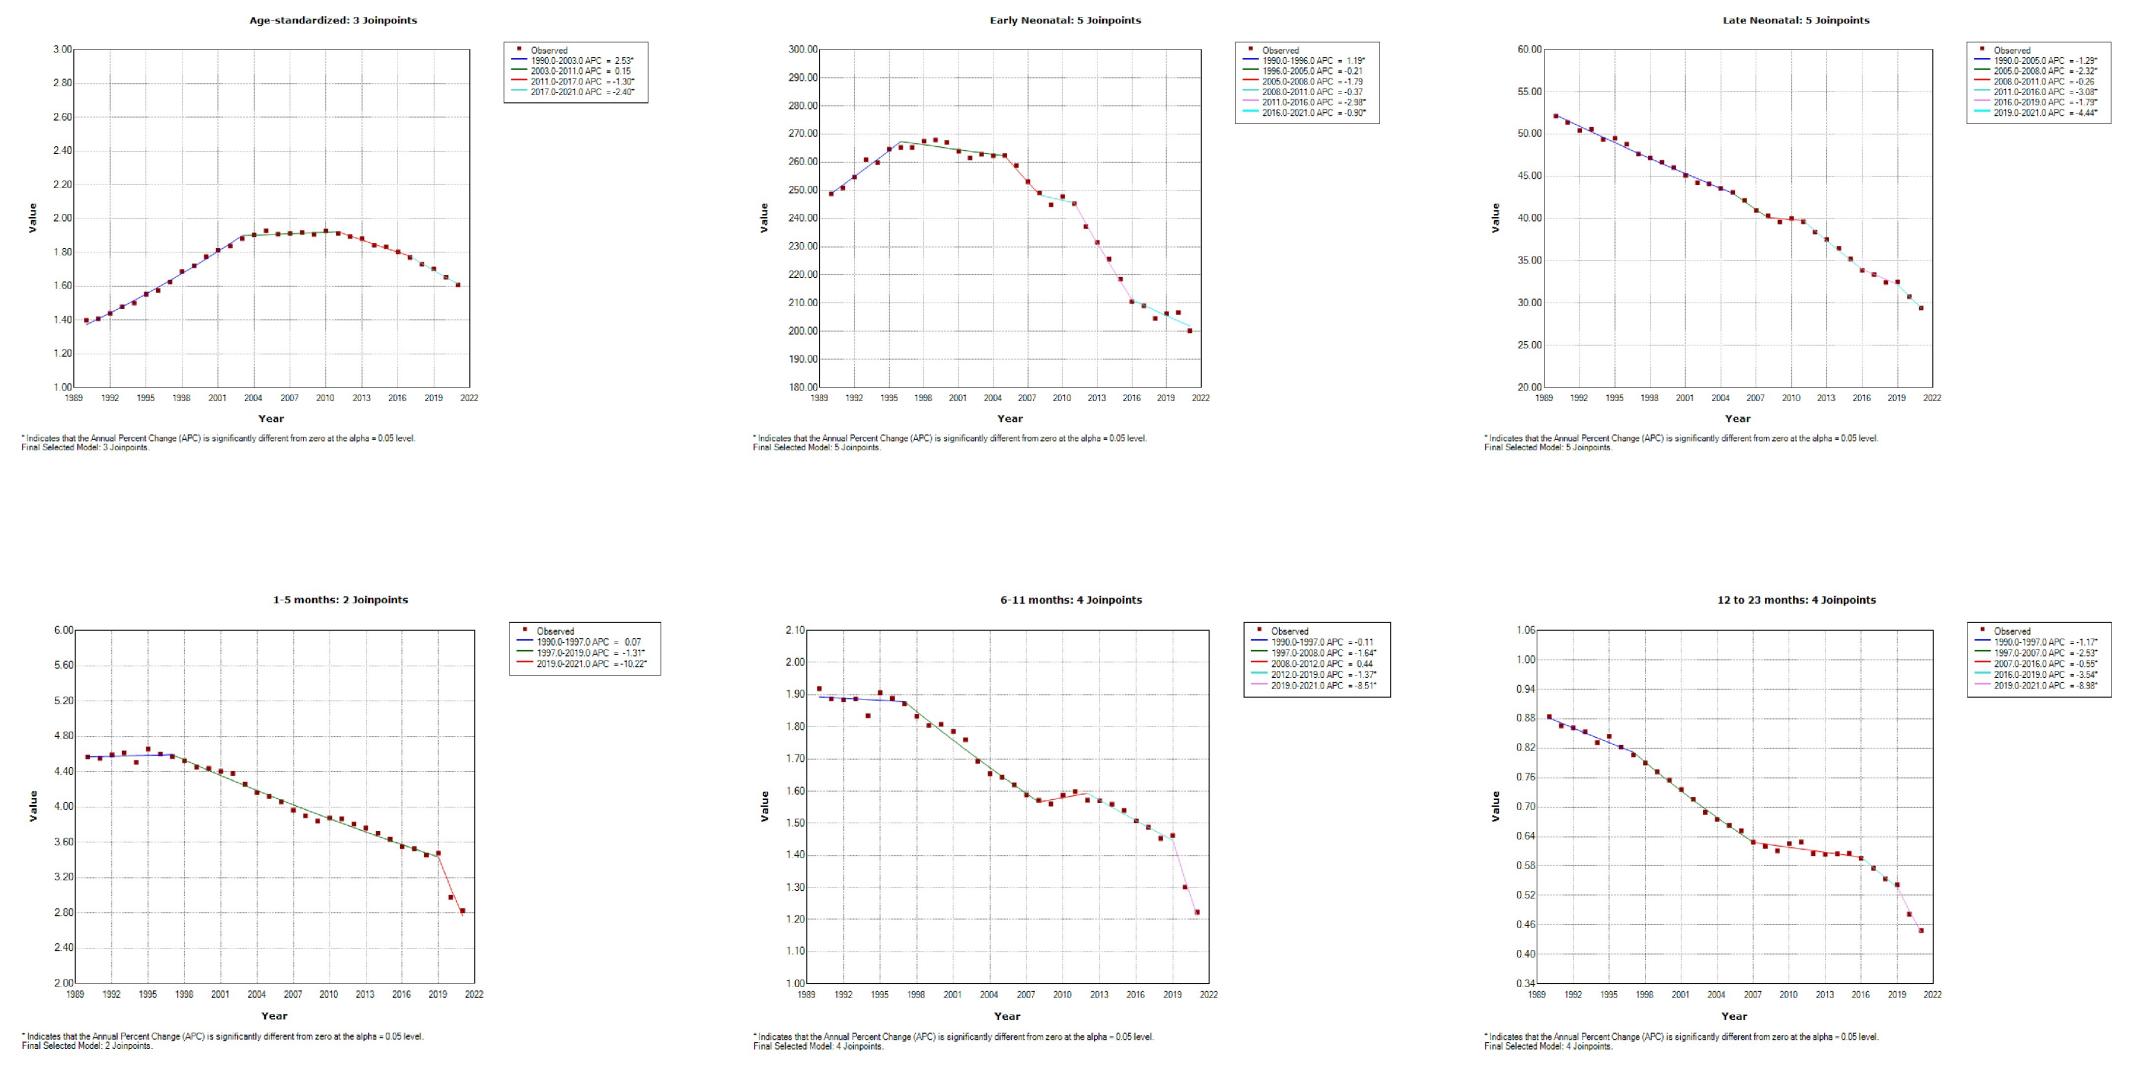


**Supplementary Figure 1.** Joinpoint regression analysis of global age-specific MRSA mortality trends, 1990–2021.


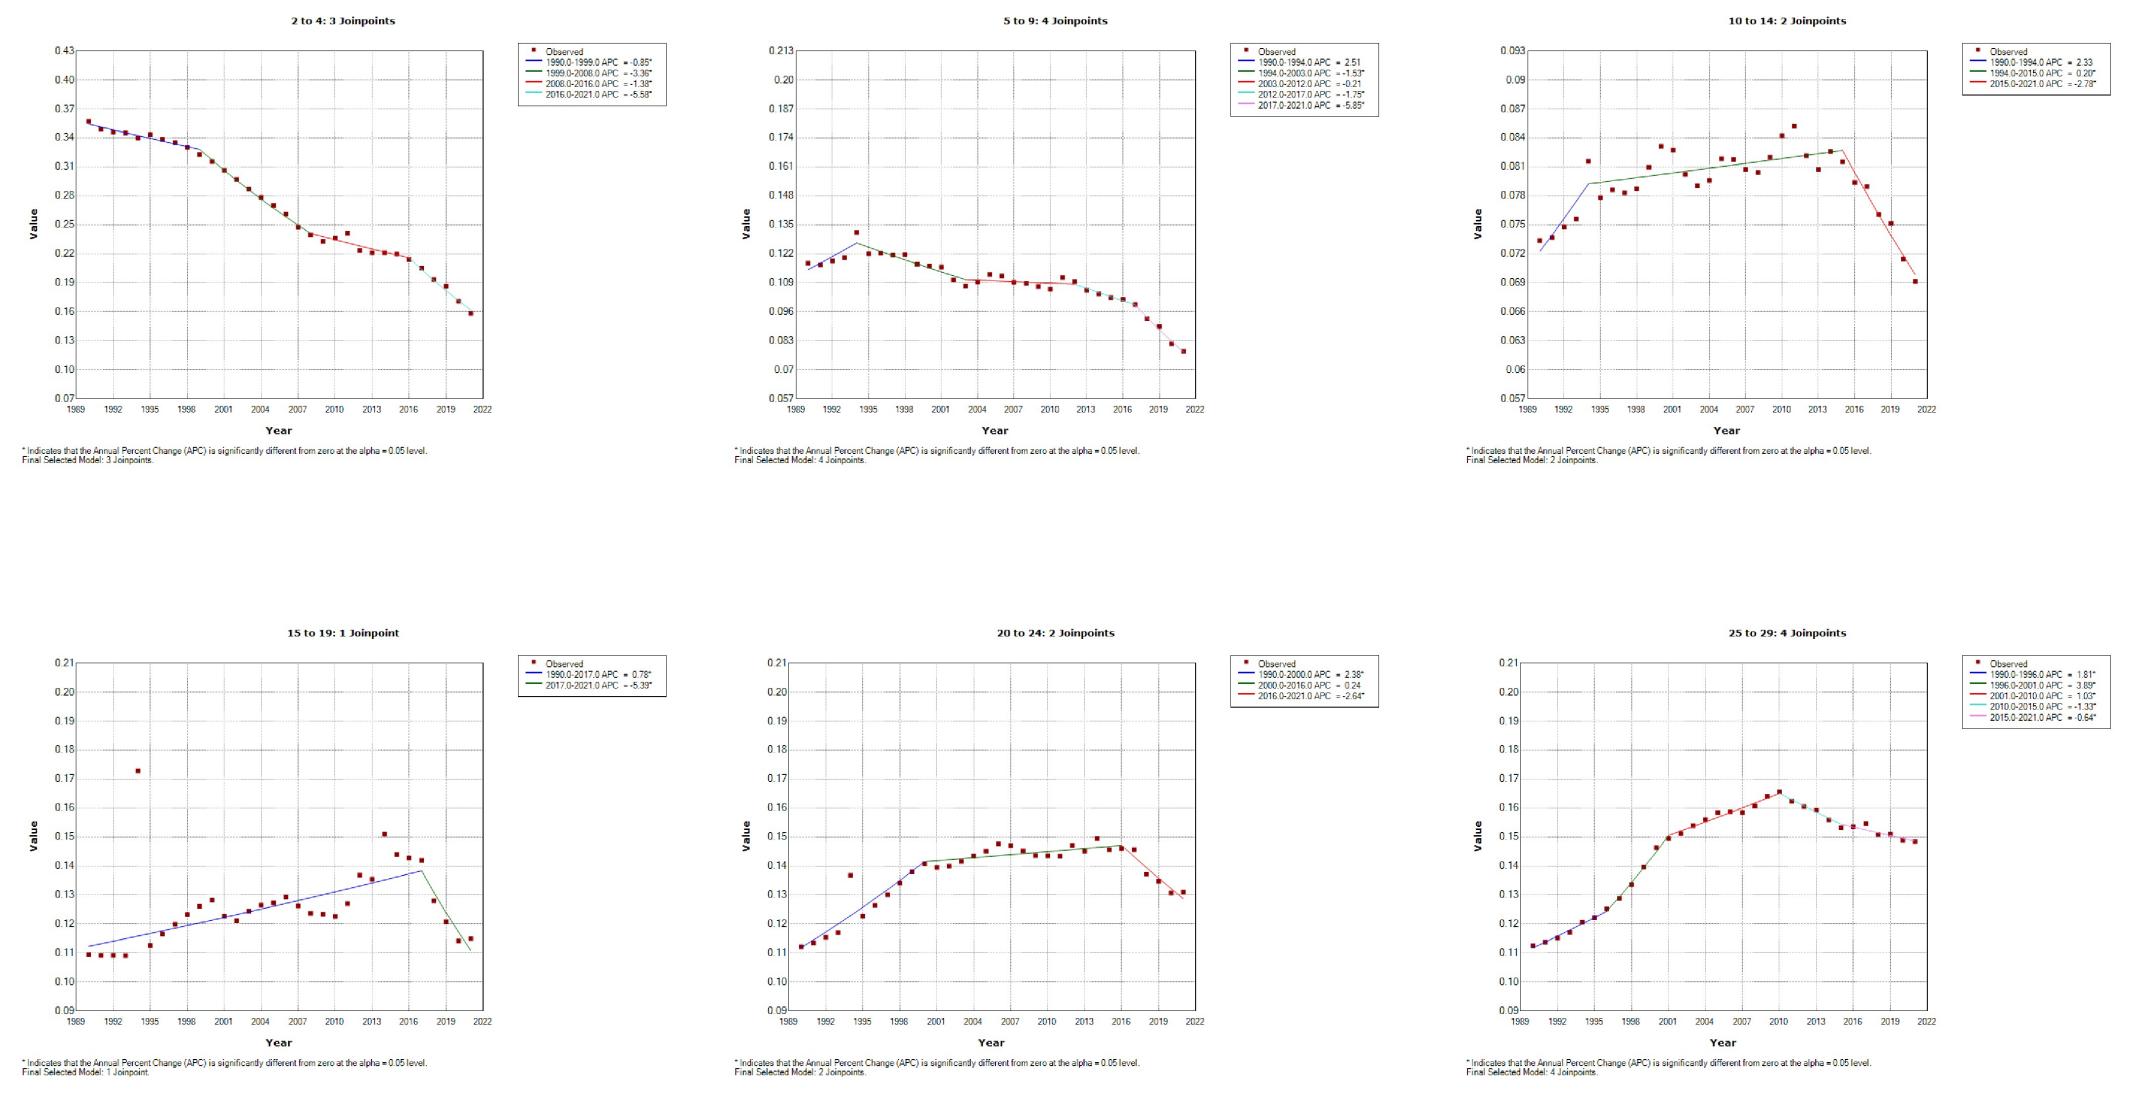


**Supplementary Figure 1.** Joinpoint regression analysis of global age-specific MRSA mortality trends, 1990–2021 (continued).


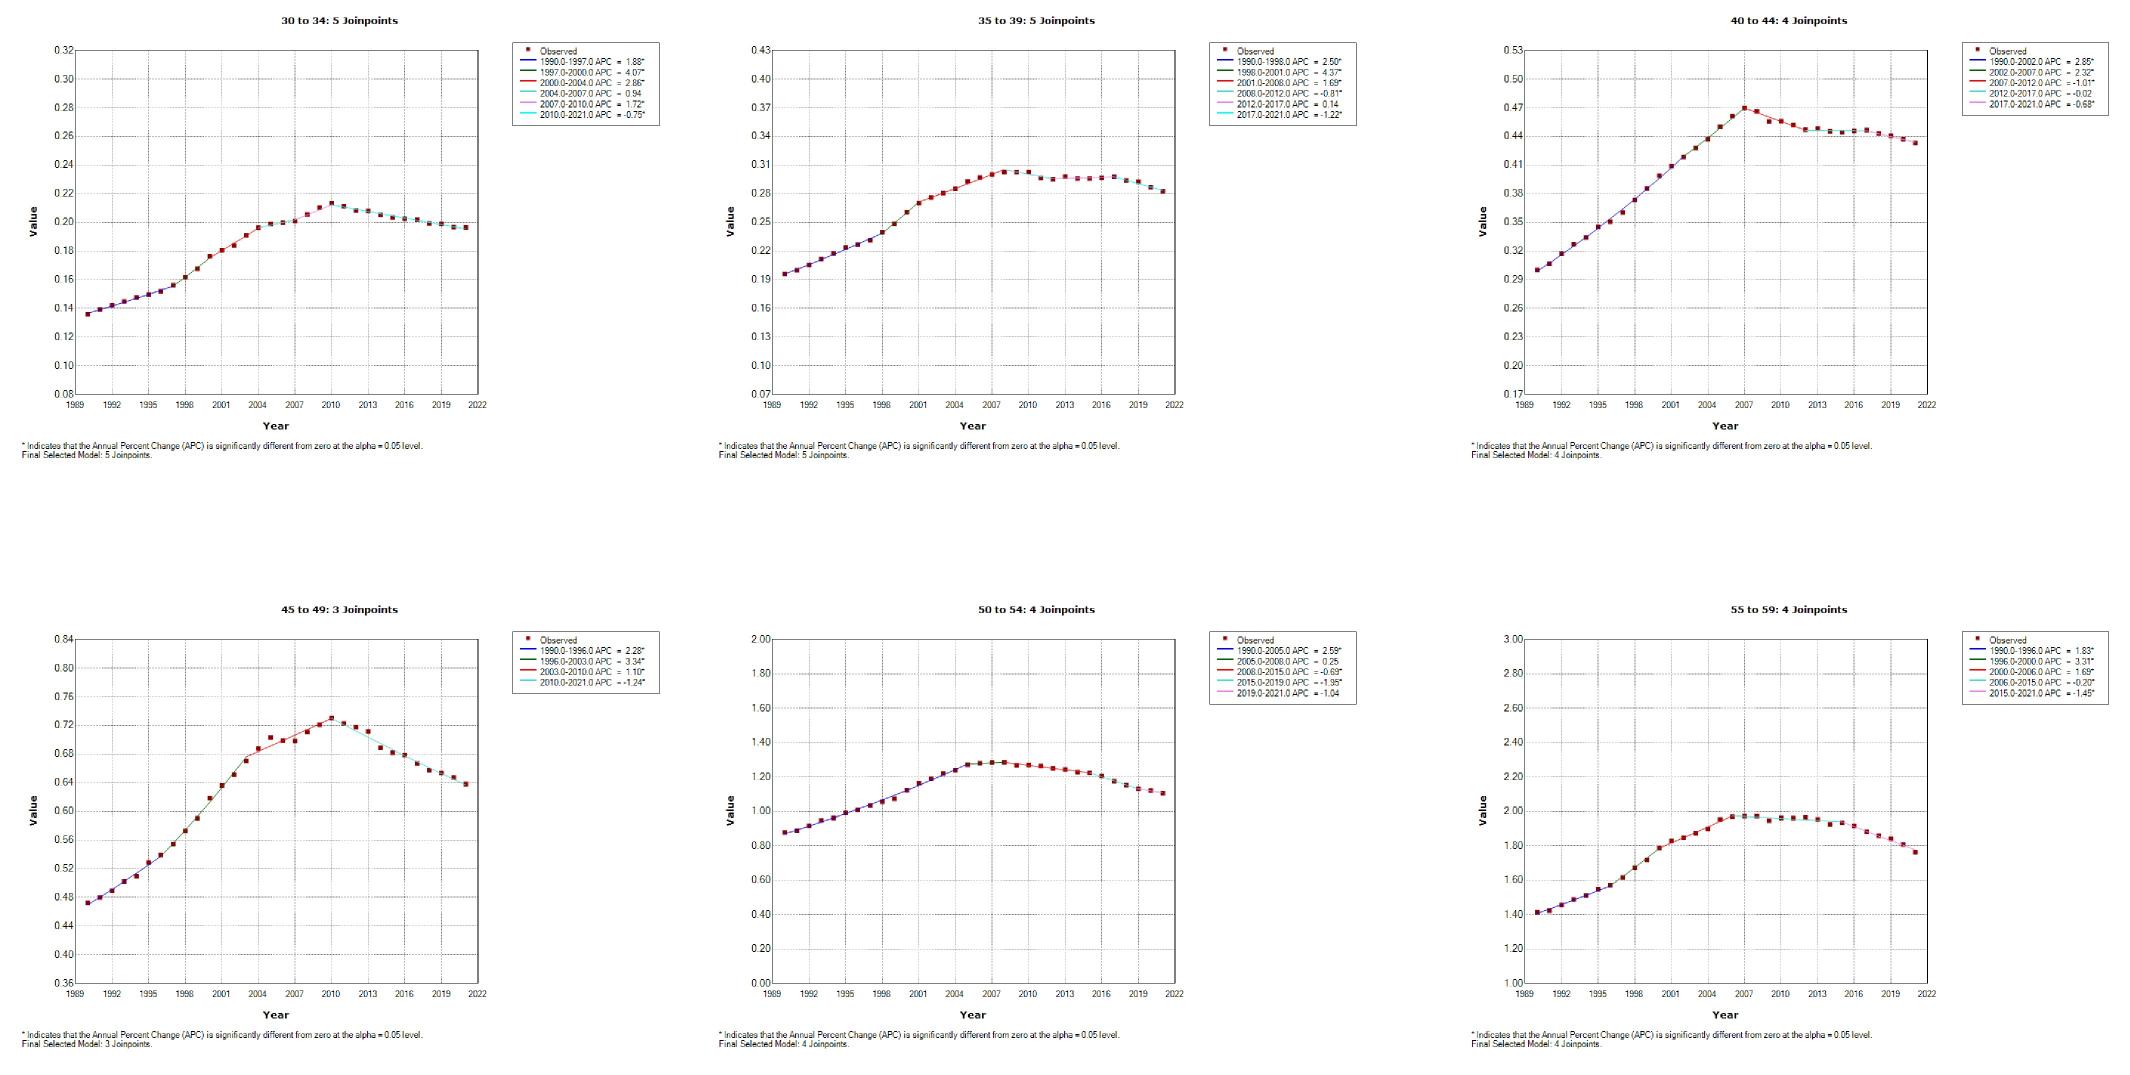


**Supplementary Figure 1.** Joinpoint regression analysis of global age-specific MRSA mortality trends, 1990–2021 (continued).


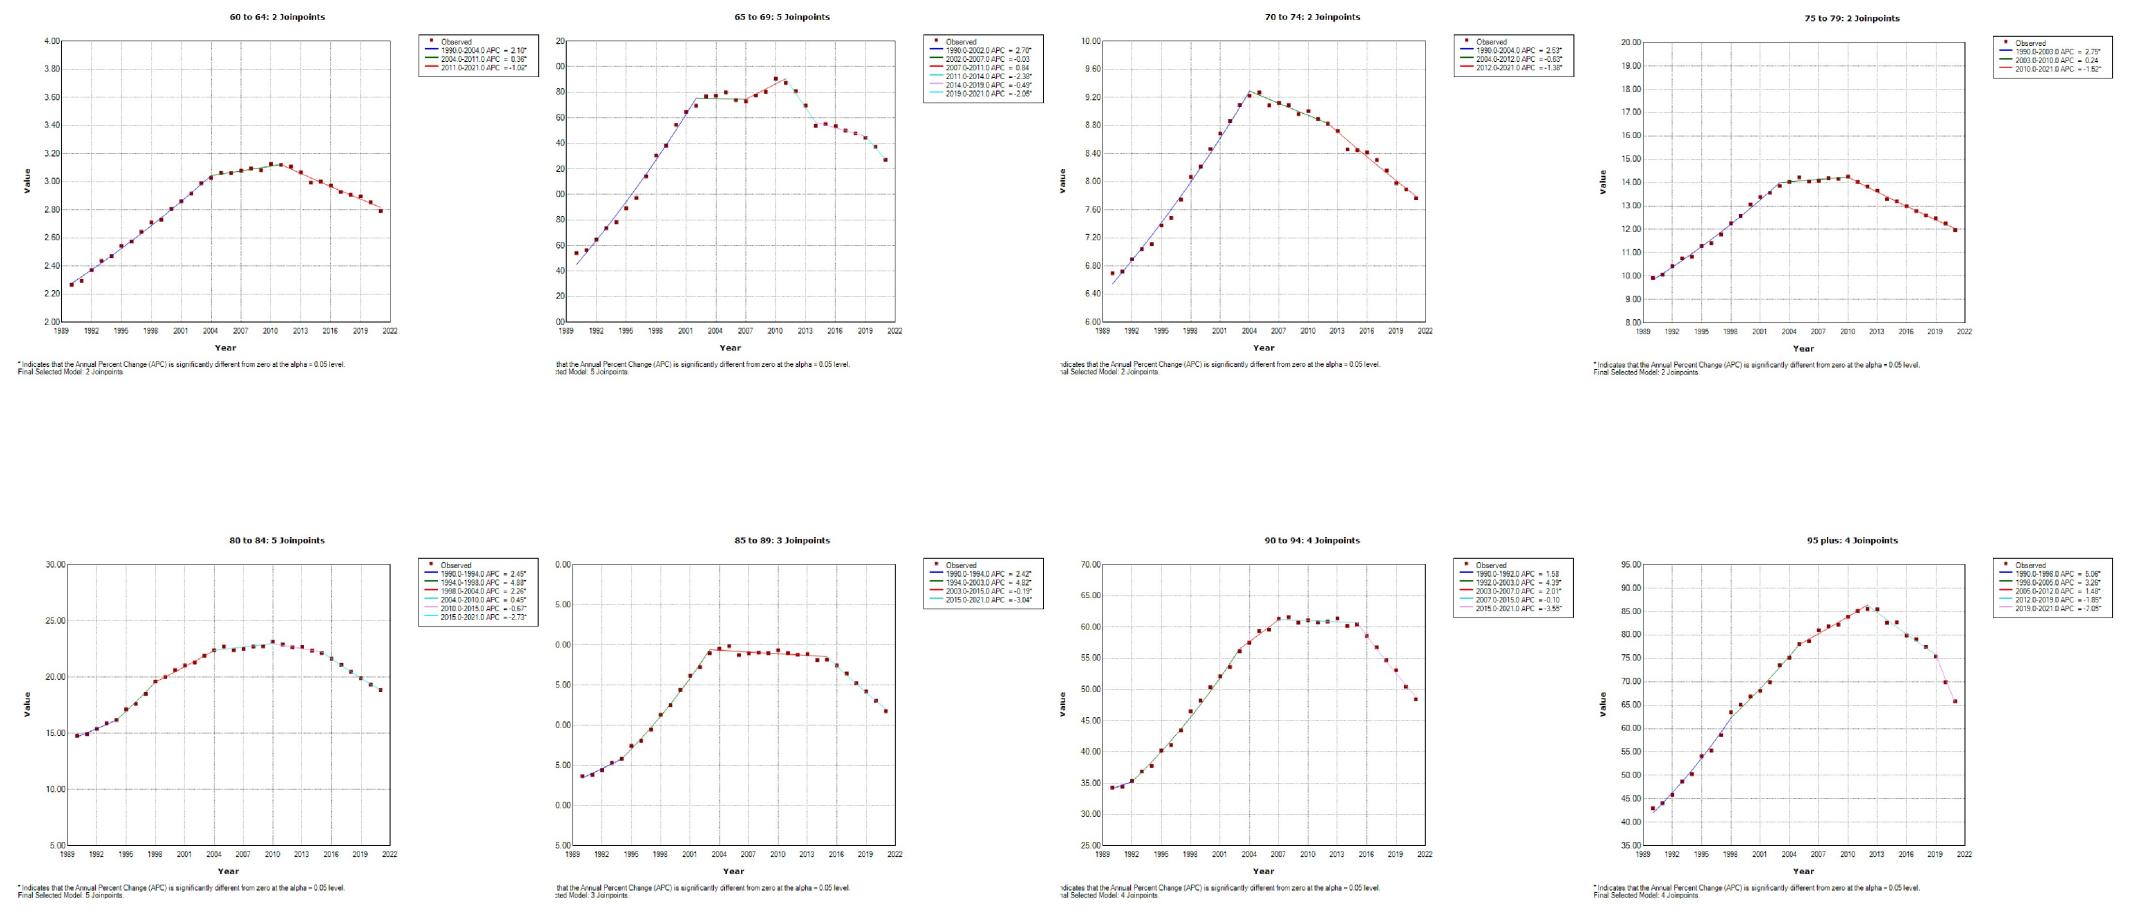


**Supplementary Figure 1.** Joinpoint regression analysis of global age-specific MRSA mortality trends, 1990–2021 (continued).

Abbreviation: APC, annual percent change.

**Statistical Code 1.** Frontier analysis

# Load required packages

library(dplyr)

# Set working directory and read data

setwd('C:/Users/yinzh/Desktop')

df <- read.csv("DALY rate of MRSA.csv", header = TRUE)

load("GBD.Rdata") # loads objects: name_204, SDI2019, dflocation

lab <- "DALYs (Disability-Adjusted Life Years)"

# Data preprocessing: filter required rows and columns

df1 <- df %>%

filter(measure_name == "DALYs (Disability-Adjusted Life Years)") %>%

filter(age_name == "Age-standardized") %>%

filter(sex_name == "Both") %>%

filter(metric_name == "Rate") %>%

filter(location_id %in% name_204) %>%

filter(year %in% 1990:2021) %>%

select(location_id, location_name, year, val)

# Merge SDI data

dfx <- df1 %>%

left_join(SDI2019 %>% select(location_id, year, sdi), by = c("location_id", "year")) %>%

rename(SDI = sdi) %>%

select(-location_name)

# Original data for bootstrap sampling

original_data <- dfx

# Compute original frontier

original_frontier <- original_data %>%

arrange(SDI, desc(val)) %>%

mutate(frontier_original = cummin(val))

# ---------- Bootstrap loop ----------

boostrap_num <- 100

boostrap_DEA <- data.frame()

for (iteration_number in 1:boostrap_num) {

boot_sample <- original_data[sample(1:nrow(original_data), replace = TRUE), ]

# Sort by SDI ascending, val descending, compute frontier

boot_sample <- boot_sample %>%

arrange(SDI, desc(val)) %>%

mutate(frontier = cummin(val))

# Keep all observations

boostrap_DEA <- rbind(

boostrap_DEA,

boot_sample[, c("location_id", "year", "val", "SDI", "frontier")]

)

print(iteration_number)

}

# For each original observation, calculate mean frontier across bootstrap samples

boostrap_DEA <- boostrap_DEA %>%

group_by(location_id, year, val, SDI) %>%

summarise(frontier = mean(frontier, na.rm = TRUE), .groups = "drop")

# Save bootstrap average frontier results

boostrap_DEAx <- boostrap_DEA

# ---------- Subsequent statistical analysis ----------

boostrap_DEA <- boostrap_DEAx %>% mutate(eff_diff = val - frontier)

# Data for 1990 and 2021

boostrap_DEA_1990 <- boostrap_DEA %>% filter(year == 1990)

boostrap_DEA_2021 <- boostrap_DEA %>% filter(year == 2021)

# Classify trend (increase/decrease) from 1990 to 2021

boostrap_DEA_2021$trend <- ifelse(boostrap_DEA_2021$val > boostrap_DEA_1990$val, "Increase", "Decrease")

# Merge geographic information

boostrap_DEA_2021 <- left_join(boostrap_DEA_2021, dflocation, by = "location_id")

# Identify points with largest efficiency difference in 2021 (top 15)

black <- boostrap_DEA_2021 %>%

arrange(desc(eff_diff)) %>%

head(15)

# Compute SDI quartiles (to define low/high SDI regions)

sdi_quantiles <- quantile(boostrap_DEA_2021$SDI, probs = c(0.25, 0.75), na.rm = TRUE)

low_sdi_threshold <- sdi_quantiles[1] # first quartile (Q1)

high_sdi_threshold <- sdi_quantiles[2] # third quartile (Q3)

# 5 low-SDI points closest to the frontier (smallest eff_diff)

low_dist <- boostrap_DEA_2021 %>%

filter(SDI <= low_sdi_threshold) %>%

arrange(eff_diff) %>%

slice_head(n = 5)

# 5 high-SDI points farthest from the frontier (largest eff_diff)

high_dist <- boostrap_DEA_2021 %>%

filter(SDI >= high_sdi_threshold) %>%

arrange(desc(eff_diff)) %>%

slice_head(n = 5)

# Merge full dataset with geographic info

data <- left_join(boostrap_DEA, dflocation, by = "location_id")

# Export results

write.csv(boostrap_DEA_2021, "2021_frontier_analysis.csv", row.names = FALSE)

**Statistical Code 2.** Inequality analysis

# Load required packages

library(MASS)

library(car)

library(splines)

library(data.table)

library(vroom)

library(dplyr)

library(tidyr)

# Set working directory

setwd('C:/Users/yinzh/Desktop')

# Load data

load("1.Rdata")

load("GBD.Rdata")

df <- read.csv("DALY rate of MRSA.csv", header = TRUE)

# ----------------------------------------------------------------------------

# Function 1: Calculate Slope Index of Inequality (SII)

# ----------------------------------------------------------------------------

inequ1 <- function(dfx = dfx, lab = "Disease burden") {

# Adjust age index for age‑standardized rates (age_id = 27 → age‑standardized)

if (unique(dfx$age_id) == 27) {

ageidx <- 22

} else {

ageidx <- unique(dfx$age_id)

}

# Get population data for the specific demographic group

pop <- population %>%

filter(location_id %in% unique(dfx$location_id)) %>%

filter(age_id %in% ageidx) %>%

filter(sex_id %in% unique(dfx$sex_id)) %>%

filter(year %in% c(1990, 2021)) %>%

mutate(pop = val) %>%

select(location_id, year, pop)

# Merge data with SDI and population

dfx1 <- dfx %>%

left_join(SDI2019 %>% select(location_id, year, sdi)) %>%

left_join(pop)

# Calculate total global population for each year

a <- dfx1 %>%

filter(metric_name == "Rate") %>%

group_by(year) %>%

summarise(sum = sum(pop))

pop1990 <- a$sum[1]

pop2021 <- a$sum[2]

# Calculate population‑weighted rank by SDI

rank <- dfx1 %>%

mutate(pop_global = ifelse(year == 1990, pop1990, pop2021)) %>%

group_by(year, metric_name) %>%

arrange(sdi) %>%

mutate(cummu = cumsum(pop),

half = pop / 2,

midpoint = cummu - half,

weighted_order = midpoint / pop_global)

rank$year <- factor(rank$year)

# Subset data for 1990 and 2021

temp1 <- rank %>% filter(metric_name == "Rate", year == 1990)

temp2 <- rank %>% filter(metric_name == "Rate", year == 2021)

# Heteroscedasticity diagnostics

fit1 <- lm(val ~ weighted_order, data = temp1)

fit2 <- lm(val ~ weighted_order, data = temp2)

ncvTest(fit1)

ncvTest(fit2)

# Robust regression (Huber M‑estimator) to account for heteroscedasticity

r.huber1 <- rlm(val ~ weighted_order, data = temp1)

r.huber2 <- rlm(val ~ weighted_order, data = temp2)

coef_r_huber1 <- coef(r.huber1)

coef_r_huber2 <- coef(r.huber2)

# Confidence intervals for robust regression coefficients

confint_r_huber1 <- confint.default(r.huber1)

confint_r_huber2 <- confint.default(r.huber2)

# Combine SII (slope) results

results_df <- data.frame(

Year = rep(c(1990, 2021), each = 2),

Coefficient = c(coef_r_huber1, coef_r_huber2),

Lower_CI = c(confint_r_huber1[, 1], confint_r_huber2[, 1]),

Upper_CI = c(confint_r_huber1[, 2], confint_r_huber2[, 2]),

Type = rep(c("Intercept", "Slope"), 2)

) %>%

mutate(num = sprintf("%.2f(%.2f, %.2f)", Coefficient, Lower_CI, Upper_CI)) %>%

filter(Type == "Slope")

print(results_df)

}

# ----------------------------------------------------------------------------

# Function 2: Calculate SII and Concentration Index (CI) with bootstrap

# ----------------------------------------------------------------------------

inequ2 <- function(dfx = dfx, lab = "Disease burden") {

# ---- SII part ----

if (unique(dfx$age_id) == 27) {

ageidx <- 22

} else {

ageidx <- unique(dfx$age_id)

}

pop <- population %>%

filter(location_id %in% unique(dfx$location_id)) %>%

filter(age_id %in% ageidx) %>%

filter(sex_id %in% unique(dfx$sex_id)) %>%

filter(year %in% c(1990, 2021)) %>%

mutate(pop = val) %>%

select(location_id, year, pop)

dfx1 <- dfx %>%

left_join(SDI2019 %>% select(location_id, year, sdi)) %>%

left_join(pop)

a <- dfx1 %>%

filter(metric_name == "Rate") %>%

group_by(year) %>%

summarise(sum = sum(pop))

pop1990 <- a$sum[1]

pop2021 <- a$sum[2]

rank <- dfx1 %>%

mutate(pop_global = ifelse(year == 1990, pop1990, pop2021)) %>%

group_by(year, metric_name) %>%

arrange(sdi) %>%

mutate(cummu = cumsum(pop),

half = pop / 2,

midpoint = cummu - half,

weighted_order = midpoint / pop_global)

rank$year <- factor(rank$year)

temp1 <- rank %>% filter(metric_name == "Rate", year == 1990)

temp2 <- rank %>% filter(metric_name == "Rate", year == 2021)

fit1 <- lm(val ~ weighted_order, data = temp1)

fit2 <- lm(val ~ weighted_order, data = temp2)

ncvTest(fit1)

ncvTest(fit2)

r.huber1 <- rlm(val ~ weighted_order, data = temp1)

r.huber2 <- rlm(val ~ weighted_order, data = temp2)

coef_r_huber1 <- coef(r.huber1)

coef_r_huber2 <- coef(r.huber2)

confint_r_huber1 <- confint.default(r.huber1)

confint_r_huber2 <- confint.default(r.huber2)

results_df <- data.frame(

Year = rep(c(1990, 2021), each = 2),

Coefficient = c(coef_r_huber1, coef_r_huber2),

Lower_CI = c(confint_r_huber1[, 1], confint_r_huber2[, 1]),

Upper_CI = c(confint_r_huber1[, 2], confint_r_huber2[, 2]),

Type = rep(c("Intercept", "Slope"), 2)

) %>%

mutate(num = sprintf("%.2f(%.2f, %.2f)", Coefficient, Lower_CI, Upper_CI)) %>%

filter(Type == "Slope")

print(results_df)

# ---- Concentration Index (CI) part ----

# Prepare data for CI

dfx1 <- dfx %>%

left_join(SDI2019 %>% select(location_id, year, sdi)) %>%

left_join(pop)

if (length(unique(dfx1$metric_name)) == 1) {

dfx1_1990 <- filter(dfx1, year == 1990) %>%

filter(metric_name == "Rate") %>%

select(location_name, metric_name, year, val, sdi, pop)

dfx1_2021 <- filter(dfx1, year == 2021) %>%

filter(metric_name == "Rate") %>%

select(location_name, metric_name, year, val, sdi, pop)

} else {

dfx1_1990 <- filter(dfx1, year == 1990) %>%

filter(metric_name == "Number") %>%

select(location_name, metric_name, year, val, sdi, pop)

dfx1_2021 <- filter(dfx1, year == 2021) %>%

filter(metric_name == "Number") %>%

select(location_name, metric_name, year, val, sdi, pop)

}

# Function to calculate Concentration Index using the area method

calculate_CI <- function(data) {

data <- data %>% arrange(sdi)

n <- nrow(data)

data$R <- (1:n - 0.5) / n

data <- data %>%

mutate(cum_y = cumsum(val) / sum(val))

# Trapezoidal rule for area under concentration curve

area_under_curve <- sum((data$R[-1] - data$R[-n]) * (data$cum_y[-1] + data$cum_y[-n]) / 2)

area_under_equality_line <- 0.5

CI_area <- 2 * (area_under_equality_line - area_under_curve)

return(CI_area)

}

# Bootstrap to obtain confidence intervals for CI

calculate_CI_with_CI <- function(data, n_bootstrap = 1000, conf_level = 0.95) {

original_CI <- calculate_CI(data)

bootstrap_CIs <- numeric(n_bootstrap)

set.seed(123) # For reproducibility

for (i in 1:n_bootstrap) {

bootstrap_sample <- data[sample(1:nrow(data), replace = TRUE), ]

bootstrap_CIs[i] <- calculate_CI(bootstrap_sample)

}

lower_bound <- quantile(bootstrap_CIs, (1 - conf_level) / 2)

upper_bound <- quantile(bootstrap_CIs, 1 - (1 - conf_level) / 2)

return(list(

original_CI = original_CI,

lower_bound = lower_bound,

upper_bound = upper_bound,

bootstrap_CIs = bootstrap_CIs

))

}

# Compute CI for 1990 and 2021

CI_1990 <- calculate_CI_with_CI(dfx1_1990)

CI_2021 <- calculate_CI_with_CI(dfx1_2021)

CI_results <- data.frame(

Year = c(1990, 2021),

CI_Mean = c(CI_1990$original_CI, CI_2021$original_CI),

CI_Lower = c(CI_1990$lower_bound, CI_2021$lower_bound),

CI_Upper = c(CI_1990$upper_bound, CI_2021$upper_bound)

) %>%

mutate(num = sprintf("%.2f(%.2f, %.2f)", CI_Mean, CI_Lower, CI_Upper))

print(CI_results)

}

# ----------------------------------------------------------------------------

# Main analysis loop

# ----------------------------------------------------------------------------

# Clean and prepare data

df <- fread("DALY rate of MRSA.csv") %>%

mutate(measure_name = if_else(measure_name == "DALYs (Disability-Adjusted Life Years)", "DALYs", measure_name)) %>%

mutate(measure_name = if_else(measure_name == "YLDs (Years Lived with Disability)", "YLDs", measure_name)) %>%

filter(year > 1989)

# Create output directory if needed

if (!dir.exists("./Fig5")) {

dir.create("./Fig5")

}

# Loop through each cause and measure

for (i in unique(df$cause_name)) {

print(paste("Analyzing:", i))

df1 <- df %>% filter(cause_name == i)

for (j in unique(df1$measure_name)) {

print(paste("Measure:", j))

# Prepare data for inequality analysis

dfx1 <- df1 %>%

filter(measure_name == j) %>%

filter(sex_name %in% "Both") %>%

filter(location_id %in% name_204) %>%

dplyr::filter(age_id == "27") %>%

mutate(age_id = 27) %>%

filter(metric_name == "Rate") %>%

dplyr::filter(year %in% c(1990, 2021))

# Calculate inequality indices

xa1 <- inequ1(dfx = dfx1, lab = paste0(j))

xa2 <- inequ2(dfx = dfx1, lab = paste0(j))

# Save results to CSV files

write.csv(xa1$SII, paste0("./Fig5/", j, "-SII.csv"))

write.csv(xa2$CII, paste0("./Fig5/", j, "-CII.csv"))

}

}

**Statistical Code 3.** Mann-Kendall trend test and Sen’s slope estimation

# 1. Load required packages

library(tidyverse)

library(trend)

library(openxlsx)

# 2. Read data

setwd('C:/Users/yinzh/Desktop')

data <- read.csv("MRSA-antibiotics-DDD.csv")

# Check data structure

cat("Data structure:\n")

str(data)

cat("\nFirst 6 rows:\n")

head(data)

# 3. Ensure antibiotic columns are numeric

data <- data %>%

mutate(across(c(broad_spectrum_penicillins, carbapenems,

cephalosporins, fluoroquinolones),

as.numeric))

cat("\nConverted data structure:\n")

str(data)

# 4. Function to perform Mann-Kendall test and extract results

mk_test_summary <- function(ts_data) {

if (!is.numeric(ts_data)) {

ts_data <- as.numeric(ts_data)

}

if (length(ts_data) < 2 || all(is.na(ts_data))) {

return(data.frame(tau = NA, p_value = NA, trend = NA, sen_slope = NA))

}

ts_clean <- na.omit(ts_data)

if (length(ts_clean) < 2) {

return(data.frame(tau = NA, p_value = NA, trend = NA, sen_slope = NA))

}

# Mann-Kendall test (using trend package)

mk_result <- mk.test(ts_clean)

# Extract tau (trend direction)

tau_value <- mk_result$estimates["tau"]

# Extract p-value

p_val <- mk_result$p.value

# Sen's slope

sen_result <- sens.slope(ts_clean)

sen_slope <- sen_result$estimates

# Determine trend direction

trend_direction <- ifelse(tau_value > 0, "increase",

ifelse(tau_value < 0, "decrease", "no trend"))

# Add significance flag

if (!is.na(p_val)) {

if (p_val < 0.05) {

trend_direction <- paste(trend_direction, "(significant)")

} else {

trend_direction <- paste(trend_direction, "(no significant)")

}

}

return(data.frame(

tau = tau_value,

p_value = p_val,

trend = trend_direction,

sen_slope = sen_slope

))

}

# 5. Perform trend tests for each country and each antibiotic

antibiotics <- c("broad_spectrum_penicillins", "carbapenems",

"cephalosporins", "fluoroquinolones")

results_list <- list()

countries <- unique(data$country)

cat("\nAnalyzing countries:\n")

print(countries)

for (country in countries) {

cat("\nProcessing:", country, "\n")

country_data <- data %>% filter(country == !!country)

country_data <- country_data %>% arrange(year)

for (ab in antibiotics) {

ts_ab <- country_data[[ab]]

if (sum(!is.na(ts_ab)) < 2) {

cat(" Warning:", ab, "insufficient data, skipped\n")

next

}

mk_result <- mk_test_summary(ts_ab)

result_row <- data.frame(

country = country,

antibiotic = ab,

years = sum(!is.na(ts_ab)),

start_year = min(country_data$year[!is.na(ts_ab)]),

end_year = max(country_data$year[!is.na(ts_ab)]),

mk_result

)

results_list[[paste(country, ab, sep = "_")]] <- result_row

cat(" ", ab, ": tau =", round(mk_result$tau, 3),

", p =", round(mk_result$p_value, 4),

", trend =", mk_result$trend, "\n")

}

}

# 6. Combine all results

results_df <- do.call(rbind, results_list)

rownames(results_df) <- NULL

cat("\n===== Results Overview =====\n")

cat("Total combinations analyzed:", nrow(results_df), "\n")

# Subset significant trends (p < 0.05)

significant_trends <- results_df %>%

filter(p_value < 0.05) %>%

arrange(p_value)

cat("\nSignificant country-antibiotic combinations (p < 0.05):", nrow(significant_trends), "\n")

if (nrow(significant_trends) > 0) {

print(significant_trends)

} else {

cat("No significant trends detected\n")

}

# 7. Summary statistics by antibiotic

summary_stats <- results_df %>%

group_by(antibiotic) %>%

summarise(

Number_of_countries = n(),

Significant_trends = sum(p_value < 0.05, na.rm = TRUE),

Proportion_significant = round(Significant_trends / Number_of_countries * 100, 1),

Mean_Sen_slope = mean(sen_slope, na.rm = TRUE),

Increasing_trends = sum(tau > 0, na.rm = TRUE),

Decreasing_trends = sum(tau < 0, na.rm = TRUE)

)

cat("\n===== Summary by Antibiotic =====\n")

print(summary_stats)

# 8. Export results to Excel

wb <- createWorkbook()

addWorksheet(wb, "Trend analysis results")

writeData(wb, "Trend analysis results", results_df)

addWorksheet(wb, "Significant trends")

writeData(wb, "Significant trends", significant_trends)

addWorksheet(wb, "Summary statistics")

writeData(wb, "Summary statistics", summary_stats)

output_excel <- "Antibiotic_consumption_trend_analysis.xlsx"

saveWorkbook(wb, output_excel, overwrite = TRUE)

cat("\nResults saved to:", output_excel, "\n")

# 9. Print brief summary

cat("\n===== Analysis completed =====\n")

cat("Number of countries analyzed:", length(countries), "\n")

cat("Number of antibiotic classes:", length(antibiotics), "\n")

cat("Total combinations analyzed:", nrow(results_df), "\n")

cat("Significant trend combinations:", nrow(significant_trends), "\n")

cat("Results saved to:", output_excel, "\n")

**Statistical Code 4.** Linear mixed-effects model

library(tidyverse)

library(lme4)

library(lmerTest)

library(performance)

library(broom.mixed)

library(car)

library(moments)

# Set random seed for reproducibility

set.seed(123)

# ----------------------------- 1. Read data -------------------------------------

setwd('C:/Users/yinzh/Desktop')

data <- read.csv("mrsa_data(9).csv", stringsAsFactors = FALSE)

# Define all required variables (dependent, independent, grouping)

required_vars <- c("country", "year", "mrsa_associated_deathrate",

"health_exp_ppp", "physicians", "hospital_beds",

"abx_penicillins", "abx_carbapenems", "abx_cephalosporins",

"abx_fluoroquinolones", "gdp_pc", "urban_pop", "mean_temp",

"humidity", "forest_area", "pm25", "water_safe",

"sanitation_safe", "internet_users", "education_exp",

"political_stability", "undernourishment", "unemployment")

# Check for missing variables

missing_vars <- setdiff(required_vars, names(data))

if (length(missing_vars) > 0) {

stop("Missing variables in data: ", paste(missing_vars, collapse = ", "))

}

# ----------------------------- 2. Data preprocessing --------------------------------

data <- data %>%

mutate(across(-c(country, year), as.numeric),

country = as.factor(country))

data_clean <- data %>% filter(!is.na(mrsa_associated_deathrate))

independent_vars <- setdiff(required_vars, c("country", "year", "mrsa_associated_deathrate"))

data_complete <- data_clean[, c("country", "year", "mrsa_associated_deathrate", independent_vars)]

data_complete <- na.omit(data_complete)

cat("Complete cases: ", nrow(data_complete), "\n")

cat("Number of countries: ", length(unique(data_complete$country)), "\n")

# Center year (reduces multicollinearity with polynomial terms)

data_complete$year_centered <- data_complete$year - mean(data_complete$year, na.rm = TRUE)

cat("\n========== Multicollinearity Analysis (based on linear model) ==========\n")

lm_full <- lm(mrsa_associated_deathrate ~ . - country - year - year_centered,

data = data_complete)

vif_full <- tryCatch(vif(lm_full), error = function(e) NULL)

if(!is.null(vif_full)) {

cat("\nVariance Inflation Factors (GVIF^(1/(2*Df))):\n")

print(vif_full)

high_vif <- vif_full[vif_full > 10]

if(length(high_vif) > 0) {

cat("\nWarning: Variables with VIF > 10 (severe multicollinearity):\n")

print(high_vif)

cat("Strongly consider removing or combining these variables before model fitting.\n")

} else {

cat("\nNo VIF > 10 detected. Multicollinearity is not a major concern.\n")

}

# Save VIF results

vif_df_initial <- data.frame(

Variable = names(vif_full),

VIF = vif_full

)

write.csv(vif_df_initial, "initial_vif_before_lmm.csv", row.names = FALSE)

} else {

cat("Unable to compute VIF (model may be singular).\n")

}

# ======== LMM suitability diagnostics ======================

cat("\n========== LMM Suitability Diagnostics ==========\n")

# Group sample sizes

country_counts <- table(data_complete$country)

cat("\n1. Observations per country:\n")

print(summary(country_counts))

cat("Countries with <3 observations: ", names(country_counts[country_counts < 3]), "\n")

if(any(country_counts < 3)) {

warning("Countries with <3 observations exist; random intercept estimates may be unreliable")

}

# Dependent variable distribution (skewness & kurtosis)

cat("\n2. Dependent variable skewness: ", skewness(data_complete$mrsa_associated_deathrate, na.rm = TRUE), "\n")

cat(" Kurtosis: ", kurtosis(data_complete$mrsa_associated_deathrate, na.rm = TRUE), "\n")

# Missing rates

missing_rate <- sapply(data_clean[, c("mrsa_associated_deathrate", independent_vars)],

function(x) mean(is.na(x)) * 100)

cat("\n3. Missing rate per variable (%):\n")

print(sort(missing_rate, decreasing = TRUE))

if(any(missing_rate > 30)) {

warning("Variables with >30% missing; complete-case deletion may introduce bias")

}

# Null model ICC (determine if LMM is needed)

null_model <- lmer(mrsa_associated_deathrate ~ 1 + (1 | country),

data = data_complete, REML = TRUE)

icc_null <- icc(null_model)

cat("\n4. Null model ICC: ", icc_null$ICC_adjusted, "\n")

cat(" Interpretation: ",

ifelse(icc_null$ICC_adjusted < 0.05, "Small between-country variance, consider linear regression",

ifelse(icc_null$ICC_adjusted < 0.2, "Moderate between-country variance, LMM suitable",

"Large between-country variance, LMM strongly recommended")), "\n")

# Outlier check (1.5 IQR rule)

outlier_summary <- function(x) {

q <- quantile(x, c(0.25, 0.75), na.rm = TRUE)

iqr <- diff(q)

lower <- q[1] - 1.5*iqr

upper <- q[2] + 1.5*iqr

c(below_lower = sum(x < lower, na.rm = TRUE), above_upper = sum(x > upper, na.rm = TRUE))

}

cat("\n5. Dependent variable outliers (1.5 IQR):\n")

print(outlier_summary(data_complete$mrsa_associated_deathrate))

cat(" Independent variable outliers (first 5):\n")

for(v in head(independent_vars, 5)) {

cat(v, ":", outlier_summary(data_complete[[v]]), "\n")

}

cat("\n========== Diagnostics complete, proceeding with model analysis ==========\n\n")

# ----------------------------- 3. Initial full model (ML) --------------------------------

initial_formula <- as.formula(paste(

"mrsa_associated_deathrate ~",

paste(c(independent_vars, "year_centered"), collapse = " + "),

"+ (1 | country)"

))

initial_model <- lmer(initial_formula, data = data_complete, REML = FALSE)

# ----------------------------- 4. Stage 1: Backward AIC selection --------------------

aic_backward <- function(model, trace = TRUE) {

current_model <- model

current_aic <- AIC(logLik(current_model))

if (trace) cat("Initial AIC:", current_aic, "\n")

fixed_terms <- attr(terms(current_model), "term.labels")

fixed_terms <- fixed_terms[!fixed_terms %in% c("(Intercept)")]

repeat {

if (length(fixed_terms) == 0) break

aic_vals <- sapply(fixed_terms, function(term) {

new_terms <- setdiff(fixed_terms, term)

if (length(new_terms) == 0) {

new_formula <- as.formula("mrsa_associated_deathrate ~ 1 + (1 | country)")

} else {

new_formula <- as.formula(paste("mrsa_associated_deathrate ~",

paste(new_terms, collapse = " + "),

"+ (1 | country)"))

}

new_model <- tryCatch(lmer(new_formula, data = data_complete, REML = FALSE),

error = function(e) NULL)

if (is.null(new_model)) return(Inf)

AIC(logLik(new_model))

})

min_aic <- min(aic_vals)

if (min_aic < current_aic - 1e-6) {

worst_term <- names(which.min(aic_vals))

if (trace) cat("Removed:", worst_term, "new AIC:", min_aic, "\n")

fixed_terms <- setdiff(fixed_terms, worst_term)

new_formula <- as.formula(paste("mrsa_associated_deathrate ~",

paste(fixed_terms, collapse = " + "),

"+ (1 | country)"))

current_model <- lmer(new_formula, data = data_complete, REML = FALSE)

current_aic <- min_aic

} else {

break

}

}

if (trace) cat("Final AIC:", current_aic, "\n")

return(current_model)

}

cat("\n=== Stage 1: Backward AIC selection ===\n")

model_stage1 <- aic_backward(initial_model, trace = TRUE)

# ----------------------------- 5. Stage 2: Backward p-value elimination --------------------

stage1_formula <- formula(model_stage1)

stage1_model_lmerTest <- lmerTest::lmer(stage1_formula, data = data_complete, REML = FALSE)

cat("\n=== Stage 2: Backward elimination (p < 0.05) ===\n")

step_result <- step(stage1_model_lmerTest,

reduce.random = FALSE,

alpha.fixed = 0.05)

final_model_ML <- get_model(step_result)

# ----------------------------- 6. Final model (REML) --------------------------------

final_model_REML <- lmer(formula(final_model_ML), data = data_complete, REML = TRUE)

# ----------------------------- 7. Results display --------------------------------

cat("\n=== Final model fixed effects ===\n")

summary(final_model_REML)

# Extract fixed effects table (with confidence intervals)

fixed_effects <- tidy(final_model_REML, effects = "fixed", conf.int = TRUE)

print(fixed_effects, digits = 4)

write.csv(fixed_effects, "final_fixed_effects.csv", row.names = FALSE)

# ----------------------------- 8. Random effects and ICC --------------------------------

var_corr <- VarCorr(final_model_REML)

random_var <- as.data.frame(var_corr)

cat("\n=== Random effect variances ===\n")

print(random_var)

icc_value <- icc(final_model_REML)

cat("\n=== Intraclass Correlation Coefficient (ICC) ===\n")

print(icc_value)

write.csv(random_var, "final_random_effects.csv", row.names = FALSE)

# ----------------------------- 9. Model R² --------------------------------

r2_values <- r2_nakagawa(final_model_REML)

cat("\n=== Model R² ===\n")

print(r2_values)

# ----------------------------- 10. Correlation with year_centered --------------------------------

cor_with_year <- cor(data_complete[, c("year_centered", independent_vars)], use = "complete.obs")

year_cor <- cor_with_year["year_centered", ]

cat("\n=== Correlation of year_centered with each predictor ===\n")

print(round(year_cor, 3))

write.csv(as.data.frame(year_cor), "correlation_year_with_predictors.csv", row.names = TRUE)

# -------------- 11. Temporal autocorrelation check (ACF values only) -------------------

cat("\n=== Additional diagnosis: Temporal autocorrelation ===\n")

data_complete$residuals <- residuals(final_model_REML)

acf_results <- list()

countries_to_check <- unique(data_complete$country)[1:min(9, length(unique(data_complete$country)))]

for (cnt in countries_to_check) {

sub_dat <- data_complete %>% filter(country == cnt) %>% arrange(year)

if(nrow(sub_dat) > 2) {

acf_res <- acf(sub_dat$residuals, plot = FALSE, lag.max = 5)

# Store numeric ACF values (no plot)

acf_results[[cnt]] <- data.frame(country = cnt, lag = acf_res$lag, acf = acf_res$acf)

}

}

if(length(acf_results) > 0) {

acf_combined <- do.call(rbind, acf_results)

write.csv(acf_combined, "residuals_acf_numeric.csv", row.names = FALSE)

cat("Numeric ACF values saved to residuals_acf_numeric.csv\n")

} else {

cat("Insufficient data for ACF calculation.\n")

}

cat("\nAnalysis completed. Results saved as CSV files.\n")

**Statistical Code 5.** Bayesian multilevel model prediction

# ------------------------ 1. Load required packages ------------------------

packages <- c("brms", "dplyr", "tidyr", "splines", "ggplot2")

for (pkg in packages) {

if (!require(pkg, character.only = TRUE)) {

install.packages(pkg, repos = "https://cloud.r-project.org")

library(pkg, character.only = TRUE)

}

}

# ------------------------ 2. Read data -------------------------

setwd('C:/Users/yinzh/Desktop')

data <- read.csv("Global-MRSA-death-rate.csv",

stringsAsFactors = FALSE,

na.strings = c("", "NA"))

# ------------------------ 3. Data preprocessing ----------------------------

num_cols <- c("Year", "Value", "Upper", "Lower")

data[num_cols] <- lapply(data[num_cols], as.numeric)

# Handle zero or negative values (add a small constant)

epsilon <- 1e-6

data$Value_safe <- ifelse(data$Value <= 0, epsilon, data$Value)

data$Upper_safe <- ifelse(data$Upper <= 0 | is.na(data$Upper),

data$Value_safe * 1.2, data$Upper)

data$Lower_safe <- ifelse(data$Lower <= 0 | is.na(data$Lower),

data$Value_safe * 0.8, data$Lower)

# Compute log‑scale standard error (approximate from 95% CI)

data$se_log <- (log(data$Upper_safe) - log(data$Lower_safe)) / (2 * 1.96)

data$log_value <- log(data$Value_safe)

# --- Manually create natural spline basis (fixed effect, df=3) ---

# The basis is fitted on all historical data; same knots/boundaries used for prediction

ns_basis <- splines::ns(data$Year, df = 3)

data$ns1 <- ns_basis[, 1]

data$ns2 <- ns_basis[, 2]

data$ns3 <- ns_basis[, 3]

# Save knots and boundary information for prediction

ns_knots <- attr(ns_basis, "knots")

ns_Boundary <- attr(ns_basis, "Boundary")

# Center year (for random slope, improves convergence)

data$Year_c <- scale(data$Year, center = TRUE, scale = FALSE)[, 1]

# Identify grouping variables -------------------------------------------------

non_group <- c("Year", "Year_c", "Value", "Upper", "Lower",

"Value_safe", "Upper_safe", "Lower_safe",

"log_value", "se_log", "ns1", "ns2", "ns3")

group_vars <- setdiff(names(data), non_group)

# Separate constant vs. varying variables

group_levels <- sapply(data[group_vars], function(x) length(unique(x)))

constant_vars <- names(group_levels[group_levels == 1])

varying_vars <- names(group_levels[group_levels > 1])

cat("=== Grouping variable information ===\n")

cat("Constant variables (single level, used as fixed values):\n",

paste(constant_vars, collapse = ", "), "\n")

cat("Varying variables (included in random effects):\n",

paste(varying_vars, collapse = ", "), "\n")

# -------------- 4. Build Bayesian model formula (dynamic random effect structure) --------------

# Fixed effects: manually created spline basis (ns1 + ns2 + ns3)

fix_part <- "log_value | se(se_log) ~ 1 + ns1 + ns2 + ns3"

# Random effects: Location uses linear random slope (Year_c); other varying variables only random intercept

if ("Location" %in% varying_vars) {

n_location <- group_levels["Location"]

if (n_location >= 5) {

# Linear random slope with centered year for efficiency

location_re <- "(1 + Year_c | Location)"

} else {

location_re <- "(1 | Location)"

cat("\n Location has only", n_location, "levels; using only random intercept.\n")

}

other_vars <- setdiff(varying_vars, "Location")

re_parts <- c(location_re, paste0("(1 | ", other_vars, ")"))

} else {

re_parts <- paste0("(1 | ", varying_vars, ")")

}

re_part <- paste(re_parts, collapse = " + ")

formula_str <- paste(fix_part, re_part, sep = " + ")

model_formula <- as.formula(formula_str)

cat("\nModel formula:\n")

print(model_formula)

# --------------------- 5. Set weakly informative priors (complete) -----------------------

priors <- c(

prior(normal(0, 5), class = "Intercept"), # global intercept

prior(normal(0, 5), class = "b"), # fixed effects (ns1, ns2, ns3)

prior(exponential(1), class = "sd"), # random effect standard deviations

prior(exponential(1), class = "sigma") # residual standard deviation

)

# ------------------- 6. Fit Bayesian model (high‑performance settings) --------------------

fit <- brm(

formula = model_formula,

data = data,

family = gaussian(),

prior = priors,

chains = 4,

iter = 4000,

warmup = 2000,

cores = 4,

control = list(

adapt_delta = 0.95,

max_treedepth = 12

),

seed = 123,

file = "mrsa_brms_fit"

)

# ------------------------- 7. Convergence diagnostics ------------------------------

summary(fit)

cat("\nConvergence diagnostics based on Rhat:\n")

rhat_vals <- rhat(fit)

if (max(rhat_vals, na.rm = TRUE) > 1.05) {

warning(" Some parameters have Rhat > 1.05; model may not have converged. Increase iter or adjust priors.")

} else {

cat(" All Rhat ≤ 1.05 – model converged.\n")

}

# ------------------- 8. Generate prediction data (future years) ---------------------

max_year <- max(data$Year, na.rm = TRUE)

target_year <- 2035

future_years <- (max_year + 1):target_year

# Get all unique combinations of grouping variables (both varying and constant)

unique_groups <- data %>%

distinct(across(all_of(c(varying_vars, constant_vars))))

# Expand each combination to future years

newdata_list <- list()

for (i in 1:nrow(unique_groups)) {

base_row <- unique_groups[i, , drop = FALSE]

for (yr in future_years) {

row_yr <- base_row

row_yr$Year <- yr

# Generate spline basis for prediction (using training knots and boundaries)

new_ns <- splines::ns(yr, df = 3, knots = ns_knots, Boundary.knots = ns_Boundary)

row_yr$ns1 <- new_ns[, 1]

row_yr$ns2 <- new_ns[, 2]

row_yr$ns3 <- new_ns[, 3]

# Center year using historical mean

row_yr$Year_c <- yr - mean(data$Year)

newdata_list[[length(newdata_list) + 1]] <- row_yr

}

}

newdata <- bind_rows(newdata_list)

newdata$se_log <- 0 # no observation error for predictions

# --------------- 9. Posterior expected predictions (using posterior_epred) ----------------

epred_samples <- posterior_epred(fit, newdata = newdata, cores = 4)

epred_samples_exp <- exp(epred_samples)

# Compute median and 95% intervals

pred_median <- apply(epred_samples_exp, 2, median)

pred_lower <- apply(epred_samples_exp, 2, quantile, probs = 0.025)

pred_upper <- apply(epred_samples_exp, 2, quantile, probs = 0.975)

newdata$Value <- pred_median

newdata$Lower <- pred_lower

newdata$Upper <- pred_upper

newdata$Is_Forecast <- TRUE

# ------------------ 10. Combine historical and forecast data ----------------------

historical <- data %>%

select(all_of(c(varying_vars, constant_vars, "Year",

"Value", "Lower", "Upper"))) %>%

mutate(Is_Forecast = FALSE)

combined <- bind_rows(historical, newdata) %>%

arrange(across(all_of(c(varying_vars, constant_vars, "Year"))))

# ------------------------- 11. Save results ------------------------------

output_file <- paste0("MRSA_forecast_brms_", target_year, ".csv")

write.csv(combined, output_file, row.names = FALSE)

cat("\nForecast completed! Results saved to:", output_file, "\n")

cat("Total rows:", nrow(combined), " | Forecast rows:", nrow(newdata), "\n")

cat("\n=== Bayesian prediction workflow finished ===\n")
