# Supplementary material
Source: Research Square preprint supplement (doi:10.21203/rs.3.rs-9853027/v1)
Supplement: Supplementary file 2 [file a9fa954edba4cb5ead47494d.xlsx]

## Sheet: Country-specific death rate
Location	Age	Sex	Measure	Metric	Pathogen	Antibiotic.class	Counterfactual	Year	Value	Upper	Lower
Afghanistan	Age-standardized	Both sexes	Deaths	Rate (per 100k)	Staphylococcus aureus	Methicillin	Attributable	1991	1.98983	3.09007	0.889586
Angola	Age-standardized	Both sexes	Deaths	Rate (per 100k)	Staphylococcus aureus	Methicillin	Attributable	1991	0.16713	0.292072	0.0421869
Albania	Age-standardized	Both sexes	Deaths	Rate (per 100k)	Staphylococcus aureus	Methicillin	Attributable	1991	0.857763	1.49492	0.220607
Andorra	Age-standardized	Both sexes	Deaths	Rate (per 100k)	Staphylococcus aureus	Methicillin	Attributable	1991	0.686302	1.24493	0.127679
United Arab Emirates	Age-standardized	Both sexes	Deaths	Rate (per 100k)	Staphylococcus aureus	Methicillin	Attributable	1991	1.12657	1.94263	0.310509
Argentina	Age-standardized	Both sexes	Deaths	Rate (per 100k)	Staphylococcus aureus	Methicillin	Attributable	1991	1.88539	2.49531	1.27548
Armenia	Age-standardized	Both sexes	Deaths	Rate (per 100k)	Staphylococcus aureus	Methicillin	Attributable	1991	1.0633	1.79075	0.335841
American Samoa	Age-standardized	Both sexes	Deaths	Rate (per 100k)	Staphylococcus aureus	Methicillin	Attributable	1991	1.02822	1.81273	0.243703
Antigua and Barbuda	Age-standardized	Both sexes	Deaths	Rate (per 100k)	Staphylococcus aureus	Methicillin	Attributable	1991	1.07115	1.83093	0.311382
Australia	Age-standardized	Both sexes	Deaths	Rate (per 100k)	Staphylococcus aureus	Methicillin	Attributable	1991	0.496899	0.738968	0.25483
Austria	Age-standardized	Both sexes	Deaths	Rate (per 100k)	Staphylococcus aureus	Methicillin	Attributable	1991	0.446872	0.647945	0.245799
Azerbaijan	Age-standardized	Both sexes	Deaths	Rate (per 100k)	Staphylococcus aureus	Methicillin	Attributable	1991	0.703981	1.22966	0.178298
Burundi	Age-standardized	Both sexes	Deaths	Rate (per 100k)	Staphylococcus aureus	Methicillin	Attributable	1991	0.945328	1.81047	0.0801842
Belgium	Age-standardized	Both sexes	Deaths	Rate (per 100k)	Staphylococcus aureus	Methicillin	Attributable	1991	1.07352	1.52769	0.61935
Benin	Age-standardized	Both sexes	Deaths	Rate (per 100k)	Staphylococcus aureus	Methicillin	Attributable	1991	1.43353	2.37893	0.48814
Burkina Faso	Age-standardized	Both sexes	Deaths	Rate (per 100k)	Staphylococcus aureus	Methicillin	Attributable	1991	0.475248	0.873565	0.0769311
Bangladesh	Age-standardized	Both sexes	Deaths	Rate (per 100k)	Staphylococcus aureus	Methicillin	Attributable	1991	1.41368	2.25014	0.577217
Bulgaria	Age-standardized	Both sexes	Deaths	Rate (per 100k)	Staphylococcus aureus	Methicillin	Attributable	1991	1.69655	2.4333	0.959793
Bahrain	Age-standardized	Both sexes	Deaths	Rate (per 100k)	Staphylococcus aureus	Methicillin	Attributable	1991	1.74344	2.91939	0.567485
Bahamas	Age-standardized	Both sexes	Deaths	Rate (per 100k)	Staphylococcus aureus	Methicillin	Attributable	1991	1.01519	1.72549	0.304891
Bosnia and Herzegovina	Age-standardized	Both sexes	Deaths	Rate (per 100k)	Staphylococcus aureus	Methicillin	Attributable	1991	0.670221	1.13716	0.20328
Belarus	Age-standardized	Both sexes	Deaths	Rate (per 100k)	Staphylococcus aureus	Methicillin	Attributable	1991	0.519276	0.87492	0.163632
Belize	Age-standardized	Both sexes	Deaths	Rate (per 100k)	Staphylococcus aureus	Methicillin	Attributable	1991	0.765308	1.3311	0.199515
Bermuda	Age-standardized	Both sexes	Deaths	Rate (per 100k)	Staphylococcus aureus	Methicillin	Attributable	1991	1.1813	2.03128	0.331321
Bolivia (Plurinational State of)	Age-standardized	Both sexes	Deaths	Rate (per 100k)	Staphylococcus aureus	Methicillin	Attributable	1991	1.13608	1.84474	0.427424
Brazil	Age-standardized	Both sexes	Deaths	Rate (per 100k)	Staphylococcus aureus	Methicillin	Attributable	1991	0.866046	1.4113	0.320794
Barbados	Age-standardized	Both sexes	Deaths	Rate (per 100k)	Staphylococcus aureus	Methicillin	Attributable	1991	1.4068	2.30757	0.506038
Brunei Darussalam	Age-standardized	Both sexes	Deaths	Rate (per 100k)	Staphylococcus aureus	Methicillin	Attributable	1991	0.624108	1.1504	0.0978188
Bhutan	Age-standardized	Both sexes	Deaths	Rate (per 100k)	Staphylococcus aureus	Methicillin	Attributable	1991	0.712393	1.28697	0.137815
Botswana	Age-standardized	Both sexes	Deaths	Rate (per 100k)	Staphylococcus aureus	Methicillin	Attributable	1991	0.863698	1.61313	0.114261
Central African Republic	Age-standardized	Both sexes	Deaths	Rate (per 100k)	Staphylococcus aureus	Methicillin	Attributable	1991	1.80914	2.88497	0.733304
Canada	Age-standardized	Both sexes	Deaths	Rate (per 100k)	Staphylococcus aureus	Methicillin	Attributable	1991	0.756768	1.2448	0.268738
Switzerland	Age-standardized	Both sexes	Deaths	Rate (per 100k)	Staphylococcus aureus	Methicillin	Attributable	1991	0.26676	0.460108	0.0734116
Chile	Age-standardized	Both sexes	Deaths	Rate (per 100k)	Staphylococcus aureus	Methicillin	Attributable	1991	2.40333	3.32043	1.48623
Côte d'Ivoire	Age-standardized	Both sexes	Deaths	Rate (per 100k)	Staphylococcus aureus	Methicillin	Attributable	1991	1.12532	1.89988	0.35076
Cameroon	Age-standardized	Both sexes	Deaths	Rate (per 100k)	Staphylococcus aureus	Methicillin	Attributable	1991	1.2767	2.14536	0.408049
Democratic Republic of the Congo	Age-standardized	Both sexes	Deaths	Rate (per 100k)	Staphylococcus aureus	Methicillin	Attributable	1991	1.27647	1.95354	0.599401
Congo	Age-standardized	Both sexes	Deaths	Rate (per 100k)	Staphylococcus aureus	Methicillin	Attributable	1991	2.46102	3.5899	1.33214
Cook Islands	Age-standardized	Both sexes	Deaths	Rate (per 100k)	Staphylococcus aureus	Methicillin	Attributable	1991	1.35236	2.32993	0.374792
Colombia	Age-standardized	Both sexes	Deaths	Rate (per 100k)	Staphylococcus aureus	Methicillin	Attributable	1991	1.18475	1.73102	0.638488
Comoros	Age-standardized	Both sexes	Deaths	Rate (per 100k)	Staphylococcus aureus	Methicillin	Attributable	1991	1.10399	1.996	0.211984
Cabo Verde	Age-standardized	Both sexes	Deaths	Rate (per 100k)	Staphylococcus aureus	Methicillin	Attributable	1991	0.773298	1.35535	0.191248
Costa Rica	Age-standardized	Both sexes	Deaths	Rate (per 100k)	Staphylococcus aureus	Methicillin	Attributable	1991	1.11006	1.67209	0.548031
Cuba	Age-standardized	Both sexes	Deaths	Rate (per 100k)	Staphylococcus aureus	Methicillin	Attributable	1991	1.18213	1.8368	0.527451
Cyprus	Age-standardized	Both sexes	Deaths	Rate (per 100k)	Staphylococcus aureus	Methicillin	Attributable	1991	3.65933	5.02901	2.28966
Czechia	Age-standardized	Both sexes	Deaths	Rate (per 100k)	Staphylococcus aureus	Methicillin	Attributable	1991	0.409846	0.607601	0.212091
Germany	Age-standardized	Both sexes	Deaths	Rate (per 100k)	Staphylococcus aureus	Methicillin	Attributable	1991	0.456487	0.647709	0.265264
Djibouti	Age-standardized	Both sexes	Deaths	Rate (per 100k)	Staphylococcus aureus	Methicillin	Attributable	1991	0.712346	1.37084	0.0538506
Dominica	Age-standardized	Both sexes	Deaths	Rate (per 100k)	Staphylococcus aureus	Methicillin	Attributable	1991	1.2195	2.07217	0.366824
Denmark	Age-standardized	Both sexes	Deaths	Rate (per 100k)	Staphylococcus aureus	Methicillin	Attributable	1991	0.141156	0.203708	0.0786038
Dominican Republic	Age-standardized	Both sexes	Deaths	Rate (per 100k)	Staphylococcus aureus	Methicillin	Attributable	1991	0.952735	1.44383	0.461641
Algeria	Age-standardized	Both sexes	Deaths	Rate (per 100k)	Staphylococcus aureus	Methicillin	Attributable	1991	1.50283	2.28924	0.71643
Ecuador	Age-standardized	Both sexes	Deaths	Rate (per 100k)	Staphylococcus aureus	Methicillin	Attributable	1991	0.755473	1.20805	0.302894
Eritrea	Age-standardized	Both sexes	Deaths	Rate (per 100k)	Staphylococcus aureus	Methicillin	Attributable	1991	1.28535	2.30661	0.264089
Spain	Age-standardized	Both sexes	Deaths	Rate (per 100k)	Staphylococcus aureus	Methicillin	Attributable	1991	1.00174	1.51881	0.484675
Estonia	Age-standardized	Both sexes	Deaths	Rate (per 100k)	Staphylococcus aureus	Methicillin	Attributable	1991	0.250046	0.392036	0.108055
Ethiopia	Age-standardized	Both sexes	Deaths	Rate (per 100k)	Staphylococcus aureus	Methicillin	Attributable	1991	1.40331	2.38042	0.426191
Finland	Age-standardized	Both sexes	Deaths	Rate (per 100k)	Staphylococcus aureus	Methicillin	Attributable	1991	0.123035	0.177051	0.0690192
Fiji	Age-standardized	Both sexes	Deaths	Rate (per 100k)	Staphylococcus aureus	Methicillin	Attributable	1991	0.723894	1.27738	0.170406
France	Age-standardized	Both sexes	Deaths	Rate (per 100k)	Staphylococcus aureus	Methicillin	Attributable	1991	1.07937	1.5546	0.604132
Micronesia (Federated States of)	Age-standardized	Both sexes	Deaths	Rate (per 100k)	Staphylococcus aureus	Methicillin	Attributable	1991	1.02997	1.84046	0.219488
Gabon	Age-standardized	Both sexes	Deaths	Rate (per 100k)	Staphylococcus aureus	Methicillin	Attributable	1991	1.29545	2.21644	0.374456
United Kingdom	Age-standardized	Both sexes	Deaths	Rate (per 100k)	Staphylococcus aureus	Methicillin	Attributable	1991	1.44021	1.97452	0.905898
Georgia	Age-standardized	Both sexes	Deaths	Rate (per 100k)	Staphylococcus aureus	Methicillin	Attributable	1991	1.15681	1.86783	0.445794
Ghana	Age-standardized	Both sexes	Deaths	Rate (per 100k)	Staphylococcus aureus	Methicillin	Attributable	1991	1.05102	1.85703	0.245011
Guinea	Age-standardized	Both sexes	Deaths	Rate (per 100k)	Staphylococcus aureus	Methicillin	Attributable	1991	1.33396	2.335	0.332918
Gambia	Age-standardized	Both sexes	Deaths	Rate (per 100k)	Staphylococcus aureus	Methicillin	Attributable	1991	1.17137	2.0996	0.243146
Guinea-Bissau	Age-standardized	Both sexes	Deaths	Rate (per 100k)	Staphylococcus aureus	Methicillin	Attributable	1991	1.29941	2.36563	0.233203
Equatorial Guinea	Age-standardized	Both sexes	Deaths	Rate (per 100k)	Staphylococcus aureus	Methicillin	Attributable	1991	1.47412	2.45568	0.492558
Greece	Age-standardized	Both sexes	Deaths	Rate (per 100k)	Staphylococcus aureus	Methicillin	Attributable	1991	1.60634	2.20252	1.01015
Grenada	Age-standardized	Both sexes	Deaths	Rate (per 100k)	Staphylococcus aureus	Methicillin	Attributable	1991	1.20102	2.02736	0.374682
Greenland	Age-standardized	Both sexes	Deaths	Rate (per 100k)	Staphylococcus aureus	Methicillin	Attributable	1991	1.44097	2.44257	0.439362
Guatemala	Age-standardized	Both sexes	Deaths	Rate (per 100k)	Staphylococcus aureus	Methicillin	Attributable	1991	2.99843	3.86528	2.13158
Guam	Age-standardized	Both sexes	Deaths	Rate (per 100k)	Staphylococcus aureus	Methicillin	Attributable	1991	0.815952	1.40288	0.229027
Guyana	Age-standardized	Both sexes	Deaths	Rate (per 100k)	Staphylococcus aureus	Methicillin	Attributable	1991	1.24408	2.08294	0.405211
Honduras	Age-standardized	Both sexes	Deaths	Rate (per 100k)	Staphylococcus aureus	Methicillin	Attributable	1991	0.471608	0.789497	0.153719
Croatia	Age-standardized	Both sexes	Deaths	Rate (per 100k)	Staphylococcus aureus	Methicillin	Attributable	1991	1.5973	2.34706	0.847536
Haiti	Age-standardized	Both sexes	Deaths	Rate (per 100k)	Staphylococcus aureus	Methicillin	Attributable	1991	1.00621	1.72318	0.289238
Hungary	Age-standardized	Both sexes	Deaths	Rate (per 100k)	Staphylococcus aureus	Methicillin	Attributable	1991	0.761042	1.22085	0.301232
Indonesia	Age-standardized	Both sexes	Deaths	Rate (per 100k)	Staphylococcus aureus	Methicillin	Attributable	1991	0.99058	1.64168	0.339483
India	Age-standardized	Both sexes	Deaths	Rate (per 100k)	Staphylococcus aureus	Methicillin	Attributable	1991	1.94283	2.52195	1.36371
Ireland	Age-standardized	Both sexes	Deaths	Rate (per 100k)	Staphylococcus aureus	Methicillin	Attributable	1991	2.41696	3.2375	1.59642
Iran (Islamic Republic of)	Age-standardized	Both sexes	Deaths	Rate (per 100k)	Staphylococcus aureus	Methicillin	Attributable	1991	1.79619	2.34937	1.24301
Iraq	Age-standardized	Both sexes	Deaths	Rate (per 100k)	Staphylococcus aureus	Methicillin	Attributable	1991	2.21256	2.59922	1.8259
Iceland	Age-standardized	Both sexes	Deaths	Rate (per 100k)	Staphylococcus aureus	Methicillin	Attributable	1991	0.742298	1.36759	0.11701
Israel	Age-standardized	Both sexes	Deaths	Rate (per 100k)	Staphylococcus aureus	Methicillin	Attributable	1991	1.10601	1.82401	0.388017
Italy	Age-standardized	Both sexes	Deaths	Rate (per 100k)	Staphylococcus aureus	Methicillin	Attributable	1991	1.09561	1.63521	0.556005
Jamaica	Age-standardized	Both sexes	Deaths	Rate (per 100k)	Staphylococcus aureus	Methicillin	Attributable	1991	0.786991	1.33277	0.241215
Jordan	Age-standardized	Both sexes	Deaths	Rate (per 100k)	Staphylococcus aureus	Methicillin	Attributable	1991	1.43457	2.27422	0.594918
Japan	Age-standardized	Both sexes	Deaths	Rate (per 100k)	Staphylococcus aureus	Methicillin	Attributable	1991	1.60892	2.39609	0.821749
Kazakhstan	Age-standardized	Both sexes	Deaths	Rate (per 100k)	Staphylococcus aureus	Methicillin	Attributable	1991	1.01145	1.75113	0.271776
Kenya	Age-standardized	Both sexes	Deaths	Rate (per 100k)	Staphylococcus aureus	Methicillin	Attributable	1991	0.934877	1.55757	0.312186
Kyrgyzstan	Age-standardized	Both sexes	Deaths	Rate (per 100k)	Staphylococcus aureus	Methicillin	Attributable	1991	0.870579	1.55895	0.182207
Cambodia	Age-standardized	Both sexes	Deaths	Rate (per 100k)	Staphylococcus aureus	Methicillin	Attributable	1991	0.588585	1.01212	0.165047
Kiribati	Age-standardized	Both sexes	Deaths	Rate (per 100k)	Staphylococcus aureus	Methicillin	Attributable	1991	1.03752	1.79873	0.276297
Saint Kitts and Nevis	Age-standardized	Both sexes	Deaths	Rate (per 100k)	Staphylococcus aureus	Methicillin	Attributable	1991	1.28286	2.17259	0.393129
Republic of Korea	Age-standardized	Both sexes	Deaths	Rate (per 100k)	Staphylococcus aureus	Methicillin	Attributable	1991	1.74688	2.71206	0.781698
Kuwait	Age-standardized	Both sexes	Deaths	Rate (per 100k)	Staphylococcus aureus	Methicillin	Attributable	1991	1.06328	1.534	0.592554
Lao People's Democratic Republic	Age-standardized	Both sexes	Deaths	Rate (per 100k)	Staphylococcus aureus	Methicillin	Attributable	1991	0.307698	0.520504	0.0948917
Lebanon	Age-standardized	Both sexes	Deaths	Rate (per 100k)	Staphylococcus aureus	Methicillin	Attributable	1991	0.535185	0.970881	0.0994895
Liberia	Age-standardized	Both sexes	Deaths	Rate (per 100k)	Staphylococcus aureus	Methicillin	Attributable	1991	1.3466	2.3781	0.315103
Libya	Age-standardized	Both sexes	Deaths	Rate (per 100k)	Staphylococcus aureus	Methicillin	Attributable	1991	0.607384	1.02823	0.186537
Saint Lucia	Age-standardized	Both sexes	Deaths	Rate (per 100k)	Staphylococcus aureus	Methicillin	Attributable	1991	1.41986	2.35083	0.488902
Sri Lanka	Age-standardized	Both sexes	Deaths	Rate (per 100k)	Staphylococcus aureus	Methicillin	Attributable	1991	1.24031	1.97977	0.500847
Lesotho	Age-standardized	Both sexes	Deaths	Rate (per 100k)	Staphylococcus aureus	Methicillin	Attributable	1991	0.233707	0.421174	0.0462403
Lithuania	Age-standardized	Both sexes	Deaths	Rate (per 100k)	Staphylococcus aureus	Methicillin	Attributable	1991	0.370977	0.543502	0.198453
Luxembourg	Age-standardized	Both sexes	Deaths	Rate (per 100k)	Staphylococcus aureus	Methicillin	Attributable	1991	0.78053	1.13641	0.424649
Latvia	Age-standardized	Both sexes	Deaths	Rate (per 100k)	Staphylococcus aureus	Methicillin	Attributable	1991	0.982327	1.52594	0.438709
Morocco	Age-standardized	Both sexes	Deaths	Rate (per 100k)	Staphylococcus aureus	Methicillin	Attributable	1991	0.726459	1.16623	0.286685
Monaco	Age-standardized	Both sexes	Deaths	Rate (per 100k)	Staphylococcus aureus	Methicillin	Attributable	1991	0.645522	1.16101	0.130038
Republic of Moldova	Age-standardized	Both sexes	Deaths	Rate (per 100k)	Staphylococcus aureus	Methicillin	Attributable	1991	0.703208	1.22076	0.185655
Madagascar	Age-standardized	Both sexes	Deaths	Rate (per 100k)	Staphylococcus aureus	Methicillin	Attributable	1991	0.379598	0.646864	0.112333
Maldives	Age-standardized	Both sexes	Deaths	Rate (per 100k)	Staphylococcus aureus	Methicillin	Attributable	1991	1.11234	1.90968	0.315003
Mexico	Age-standardized	Both sexes	Deaths	Rate (per 100k)	Staphylococcus aureus	Methicillin	Attributable	1991	1.13837	1.74357	0.533178
Marshall Islands	Age-standardized	Both sexes	Deaths	Rate (per 100k)	Staphylococcus aureus	Methicillin	Attributable	1991	1.14563	1.9669	0.324366
North Macedonia	Age-standardized	Both sexes	Deaths	Rate (per 100k)	Staphylococcus aureus	Methicillin	Attributable	1991	1.55458	2.42565	0.683513
Mali	Age-standardized	Both sexes	Deaths	Rate (per 100k)	Staphylococcus aureus	Methicillin	Attributable	1991	1.89888	2.92707	0.870691
Malta	Age-standardized	Both sexes	Deaths	Rate (per 100k)	Staphylococcus aureus	Methicillin	Attributable	1991	1.49309	2.04973	0.936447
Myanmar	Age-standardized	Both sexes	Deaths	Rate (per 100k)	Staphylococcus aureus	Methicillin	Attributable	1991	2.28172	3.30424	1.25919
Montenegro	Age-standardized	Both sexes	Deaths	Rate (per 100k)	Staphylococcus aureus	Methicillin	Attributable	1991	0.770777	1.30684	0.234712
Mongolia	Age-standardized	Both sexes	Deaths	Rate (per 100k)	Staphylococcus aureus	Methicillin	Attributable	1991	2.09468	3.06773	1.12164
Northern Mariana Islands	Age-standardized	Both sexes	Deaths	Rate (per 100k)	Staphylococcus aureus	Methicillin	Attributable	1991	1.00012	1.71252	0.287728
Mozambique	Age-standardized	Both sexes	Deaths	Rate (per 100k)	Staphylococcus aureus	Methicillin	Attributable	1991	1.09589	1.93461	0.25717
Mauritania	Age-standardized	Both sexes	Deaths	Rate (per 100k)	Staphylococcus aureus	Methicillin	Attributable	1991	1.1949	2.03641	0.353392
Mauritius	Age-standardized	Both sexes	Deaths	Rate (per 100k)	Staphylococcus aureus	Methicillin	Attributable	1991	0.918523	1.64963	0.187417
Malawi	Age-standardized	Both sexes	Deaths	Rate (per 100k)	Staphylococcus aureus	Methicillin	Attributable	1991	1.33297	2.28435	0.381599
Malaysia	Age-standardized	Both sexes	Deaths	Rate (per 100k)	Staphylococcus aureus	Methicillin	Attributable	1991	1.56765	1.95483	1.18048
Namibia	Age-standardized	Both sexes	Deaths	Rate (per 100k)	Staphylococcus aureus	Methicillin	Attributable	1991	0.958165	1.79333	0.123005
Niger	Age-standardized	Both sexes	Deaths	Rate (per 100k)	Staphylococcus aureus	Methicillin	Attributable	1991	1.37948	2.36419	0.394758
Nigeria	Age-standardized	Both sexes	Deaths	Rate (per 100k)	Staphylococcus aureus	Methicillin	Attributable	1991	1.82192	2.59106	1.05278
Nicaragua	Age-standardized	Both sexes	Deaths	Rate (per 100k)	Staphylococcus aureus	Methicillin	Attributable	1991	0.770905	1.26941	0.272401
Niue	Age-standardized	Both sexes	Deaths	Rate (per 100k)	Staphylococcus aureus	Methicillin	Attributable	1991	1.05445	1.85521	0.253693
Netherlands	Age-standardized	Both sexes	Deaths	Rate (per 100k)	Staphylococcus aureus	Methicillin	Attributable	1991	0.0904404	0.129685	0.0511954
Norway	Age-standardized	Both sexes	Deaths	Rate (per 100k)	Staphylococcus aureus	Methicillin	Attributable	1991	0.278821	0.495088	0.062554
Nepal	Age-standardized	Both sexes	Deaths	Rate (per 100k)	Staphylococcus aureus	Methicillin	Attributable	1991	1.55134	2.42622	0.676459
Nauru	Age-standardized	Both sexes	Deaths	Rate (per 100k)	Staphylococcus aureus	Methicillin	Attributable	1991	1.20398	2.16274	0.245218
New Zealand	Age-standardized	Both sexes	Deaths	Rate (per 100k)	Staphylococcus aureus	Methicillin	Attributable	1991	0.251579	0.361545	0.141614
Oman	Age-standardized	Both sexes	Deaths	Rate (per 100k)	Staphylococcus aureus	Methicillin	Attributable	1991	0.734177	1.34082	0.127538
Pakistan	Age-standardized	Both sexes	Deaths	Rate (per 100k)	Staphylococcus aureus	Methicillin	Attributable	1991	1.41313	1.94546	0.880807
Panama	Age-standardized	Both sexes	Deaths	Rate (per 100k)	Staphylococcus aureus	Methicillin	Attributable	1991	0.646352	1.03834	0.254362
Peru	Age-standardized	Both sexes	Deaths	Rate (per 100k)	Staphylococcus aureus	Methicillin	Attributable	1991	2.39968	3.19088	1.60847
Philippines	Age-standardized	Both sexes	Deaths	Rate (per 100k)	Staphylococcus aureus	Methicillin	Attributable	1991	1.80099	2.54572	1.05626
Palau	Age-standardized	Both sexes	Deaths	Rate (per 100k)	Staphylococcus aureus	Methicillin	Attributable	1991	1.16545	2.06346	0.267438
Papua New Guinea	Age-standardized	Both sexes	Deaths	Rate (per 100k)	Staphylococcus aureus	Methicillin	Attributable	1991	0.953019	1.68127	0.224766
Poland	Age-standardized	Both sexes	Deaths	Rate (per 100k)	Staphylococcus aureus	Methicillin	Attributable	1991	1.31095	1.76797	0.853933
Puerto Rico	Age-standardized	Both sexes	Deaths	Rate (per 100k)	Staphylococcus aureus	Methicillin	Attributable	1991	1.241	2.0397	0.442289
Democratic People's Republic of Korea	Age-standardized	Both sexes	Deaths	Rate (per 100k)	Staphylococcus aureus	Methicillin	Attributable	1991	1.21037	1.97314	0.447613
Portugal	Age-standardized	Both sexes	Deaths	Rate (per 100k)	Staphylococcus aureus	Methicillin	Attributable	1991	1.37661	2.0477	0.705513
Paraguay	Age-standardized	Both sexes	Deaths	Rate (per 100k)	Staphylococcus aureus	Methicillin	Attributable	1991	0.586917	0.922555	0.251278
Palestine	Age-standardized	Both sexes	Deaths	Rate (per 100k)	Staphylococcus aureus	Methicillin	Attributable	1991	1.94651	3.00436	0.888663
Qatar	Age-standardized	Both sexes	Deaths	Rate (per 100k)	Staphylococcus aureus	Methicillin	Attributable	1991	2.03244	3.16694	0.897949
Romania	Age-standardized	Both sexes	Deaths	Rate (per 100k)	Staphylococcus aureus	Methicillin	Attributable	1991	1.825	2.62099	1.02901
Russian Federation	Age-standardized	Both sexes	Deaths	Rate (per 100k)	Staphylococcus aureus	Methicillin	Attributable	1991	0.712573	1.15206	0.273081
Rwanda	Age-standardized	Both sexes	Deaths	Rate (per 100k)	Staphylococcus aureus	Methicillin	Attributable	1991	3.08746	4.50493	1.66998
Saudi Arabia	Age-standardized	Both sexes	Deaths	Rate (per 100k)	Staphylococcus aureus	Methicillin	Attributable	1991	1.04132	1.74094	0.341698
Senegal	Age-standardized	Both sexes	Deaths	Rate (per 100k)	Staphylococcus aureus	Methicillin	Attributable	1991	1.75987	2.51758	1.00216
Singapore	Age-standardized	Both sexes	Deaths	Rate (per 100k)	Staphylococcus aureus	Methicillin	Attributable	1991	0.374934	0.640089	0.10978
Solomon Islands	Age-standardized	Both sexes	Deaths	Rate (per 100k)	Staphylococcus aureus	Methicillin	Attributable	1991	1.06884	1.91789	0.219788
Sierra Leone	Age-standardized	Both sexes	Deaths	Rate (per 100k)	Staphylococcus aureus	Methicillin	Attributable	1991	1.35172	2.34658	0.356854
El Salvador	Age-standardized	Both sexes	Deaths	Rate (per 100k)	Staphylococcus aureus	Methicillin	Attributable	1991	1.19196	1.64322	0.740702
San Marino	Age-standardized	Both sexes	Deaths	Rate (per 100k)	Staphylococcus aureus	Methicillin	Attributable	1991	0.710845	1.30849	0.113201
Somalia	Age-standardized	Both sexes	Deaths	Rate (per 100k)	Staphylococcus aureus	Methicillin	Attributable	1991	1.86536	3.12463	0.606095
Serbia	Age-standardized	Both sexes	Deaths	Rate (per 100k)	Staphylococcus aureus	Methicillin	Attributable	1991	1.61618	2.59226	0.640102
South Sudan	Age-standardized	Both sexes	Deaths	Rate (per 100k)	Staphylococcus aureus	Methicillin	Attributable	1991	1.02607	1.91528	0.136861
Sao Tome and Principe	Age-standardized	Both sexes	Deaths	Rate (per 100k)	Staphylococcus aureus	Methicillin	Attributable	1991	1.10842	2.03328	0.183554
Suriname	Age-standardized	Both sexes	Deaths	Rate (per 100k)	Staphylococcus aureus	Methicillin	Attributable	1991	0.900393	1.57253	0.228254
Slovakia	Age-standardized	Both sexes	Deaths	Rate (per 100k)	Staphylococcus aureus	Methicillin	Attributable	1991	0.867509	1.40156	0.333453
Slovenia	Age-standardized	Both sexes	Deaths	Rate (per 100k)	Staphylococcus aureus	Methicillin	Attributable	1991	0.927128	1.33944	0.514815
Sweden	Age-standardized	Both sexes	Deaths	Rate (per 100k)	Staphylococcus aureus	Methicillin	Attributable	1991	0.113319	0.169037	0.0576003
Eswatini	Age-standardized	Both sexes	Deaths	Rate (per 100k)	Staphylococcus aureus	Methicillin	Attributable	1991	0.439803	0.840061	0.0395454
Seychelles	Age-standardized	Both sexes	Deaths	Rate (per 100k)	Staphylococcus aureus	Methicillin	Attributable	1991	0.903168	1.64497	0.16137
Syrian Arab Republic	Age-standardized	Both sexes	Deaths	Rate (per 100k)	Staphylococcus aureus	Methicillin	Attributable	1991	1.28522	2.0555	0.51494
Chad	Age-standardized	Both sexes	Deaths	Rate (per 100k)	Staphylococcus aureus	Methicillin	Attributable	1991	1.32077	2.2338	0.407749
Togo	Age-standardized	Both sexes	Deaths	Rate (per 100k)	Staphylococcus aureus	Methicillin	Attributable	1991	0.830543	1.53013	0.130959
Thailand	Age-standardized	Both sexes	Deaths	Rate (per 100k)	Staphylococcus aureus	Methicillin	Attributable	1991	0.791213	1.30819	0.274238
Tajikistan	Age-standardized	Both sexes	Deaths	Rate (per 100k)	Staphylococcus aureus	Methicillin	Attributable	1991	0.753411	1.37164	0.13518
Tokelau	Age-standardized	Both sexes	Deaths	Rate (per 100k)	Staphylococcus aureus	Methicillin	Attributable	1991	1.1616	2.03157	0.291635
Turkmenistan	Age-standardized	Both sexes	Deaths	Rate (per 100k)	Staphylococcus aureus	Methicillin	Attributable	1991	0.874342	1.5593	0.189382
Timor-Leste	Age-standardized	Both sexes	Deaths	Rate (per 100k)	Staphylococcus aureus	Methicillin	Attributable	1991	0.756922	1.3869	0.126947
Tonga	Age-standardized	Both sexes	Deaths	Rate (per 100k)	Staphylococcus aureus	Methicillin	Attributable	1991	0.884164	1.57461	0.193717
Trinidad and Tobago	Age-standardized	Both sexes	Deaths	Rate (per 100k)	Staphylococcus aureus	Methicillin	Attributable	1991	1.40122	2.30772	0.494726
Tunisia	Age-standardized	Both sexes	Deaths	Rate (per 100k)	Staphylococcus aureus	Methicillin	Attributable	1991	1.06887	1.61063	0.527114
Türkiye	Age-standardized	Both sexes	Deaths	Rate (per 100k)	Staphylococcus aureus	Methicillin	Attributable	1991	1.06408	1.7318	0.396357
Tuvalu	Age-standardized	Both sexes	Deaths	Rate (per 100k)	Staphylococcus aureus	Methicillin	Attributable	1991	1.03741	1.8505	0.224327
Taiwan (Province of China)	Age-standardized	Both sexes	Deaths	Rate (per 100k)	Staphylococcus aureus	Methicillin	Attributable	1991	2.61771	3.30324	1.93217
United Republic of Tanzania	Age-standardized	Both sexes	Deaths	Rate (per 100k)	Staphylococcus aureus	Methicillin	Attributable	1991	0.118255	0.204535	0.0319749
Uganda	Age-standardized	Both sexes	Deaths	Rate (per 100k)	Staphylococcus aureus	Methicillin	Attributable	1991	1.0316	1.75785	0.305352
Ukraine	Age-standardized	Both sexes	Deaths	Rate (per 100k)	Staphylococcus aureus	Methicillin	Attributable	1991	0.403168	0.745264	0.0610722
Uruguay	Age-standardized	Both sexes	Deaths	Rate (per 100k)	Staphylococcus aureus	Methicillin	Attributable	1991	1.84486	2.6632	1.02653
United States of America	Age-standardized	Both sexes	Deaths	Rate (per 100k)	Staphylococcus aureus	Methicillin	Attributable	1991	1.41685	2.12822	0.705476
Uzbekistan	Age-standardized	Both sexes	Deaths	Rate (per 100k)	Staphylococcus aureus	Methicillin	Attributable	1991	0.698416	1.21986	0.176968
Saint Vincent and the Grenadines	Age-standardized	Both sexes	Deaths	Rate (per 100k)	Staphylococcus aureus	Methicillin	Attributable	1991	1.23314	2.06812	0.39816
Venezuela (Bolivarian Republic of)	Age-standardized	Both sexes	Deaths	Rate (per 100k)	Staphylococcus aureus	Methicillin	Attributable	1991	0.431087	0.646176	0.215998
United States Virgin Islands	Age-standardized	Both sexes	Deaths	Rate (per 100k)	Staphylococcus aureus	Methicillin	Attributable	1991	1.13231	1.89203	0.372586
Viet Nam	Age-standardized	Both sexes	Deaths	Rate (per 100k)	Staphylococcus aureus	Methicillin	Attributable	1991	1.08263	1.69598	0.469278
Vanuatu	Age-standardized	Both sexes	Deaths	Rate (per 100k)	Staphylococcus aureus	Methicillin	Attributable	1991	0.852119	1.52607	0.178167
Samoa	Age-standardized	Both sexes	Deaths	Rate (per 100k)	Staphylococcus aureus	Methicillin	Attributable	1991	0.92935	1.65722	0.201478
Yemen	Age-standardized	Both sexes	Deaths	Rate (per 100k)	Staphylococcus aureus	Methicillin	Attributable	1991	1.16854	1.9602	0.376881
South Africa	Age-standardized	Both sexes	Deaths	Rate (per 100k)	Staphylococcus aureus	Methicillin	Attributable	1991	1.28522	1.79535	0.775094
Zambia	Age-standardized	Both sexes	Deaths	Rate (per 100k)	Staphylococcus aureus	Methicillin	Attributable	1991	1.44497	2.55265	0.337281
Zimbabwe	Age-standardized	Both sexes	Deaths	Rate (per 100k)	Staphylococcus aureus	Methicillin	Attributable	1991	0.863135	1.59698	0.129287
Egypt	Age-standardized	Both sexes	Deaths	Rate (per 100k)	Staphylococcus aureus	Methicillin	Attributable	1991	3.2393	4.45396	2.02464
Sudan	Age-standardized	Both sexes	Deaths	Rate (per 100k)	Staphylococcus aureus	Methicillin	Attributable	1991	0.746222	1.25144	0.241006
China	Age-standardized	Both sexes	Deaths	Rate (per 100k)	Staphylococcus aureus	Methicillin	Attributable	1991	1.51888	1.97485	1.06292
Afghanistan	Age-standardized	Both sexes	Deaths	Rate (per 100k)	Staphylococcus aureus	Methicillin	Attributable	2000	2.45318	3.46667	1.43969
Angola	Age-standardized	Both sexes	Deaths	Rate (per 100k)	Staphylococcus aureus	Methicillin	Attributable	2000	0.176454	0.304513	0.0483948
Albania	Age-standardized	Both sexes	Deaths	Rate (per 100k)	Staphylococcus aureus	Methicillin	Attributable	2000	0.89275	1.48388	0.301617
Andorra	Age-standardized	Both sexes	Deaths	Rate (per 100k)	Staphylococcus aureus	Methicillin	Attributable	2000	0.775184	1.35572	0.19465
United Arab Emirates	Age-standardized	Both sexes	Deaths	Rate (per 100k)	Staphylococcus aureus	Methicillin	Attributable	2000	1.10994	1.83294	0.386944
Argentina	Age-standardized	Both sexes	Deaths	Rate (per 100k)	Staphylococcus aureus	Methicillin	Attributable	2000	2.02126	2.41792	1.62459
Armenia	Age-standardized	Both sexes	Deaths	Rate (per 100k)	Staphylococcus aureus	Methicillin	Attributable	2000	1.16889	1.88358	0.45419
American Samoa	Age-standardized	Both sexes	Deaths	Rate (per 100k)	Staphylococcus aureus	Methicillin	Attributable	2000	1.27528	2.10986	0.440695
Antigua and Barbuda	Age-standardized	Both sexes	Deaths	Rate (per 100k)	Staphylococcus aureus	Methicillin	Attributable	2000	1.27346	2.1021	0.444812
Australia	Age-standardized	Both sexes	Deaths	Rate (per 100k)	Staphylococcus aureus	Methicillin	Attributable	2000	0.65792	0.833654	0.482186
Austria	Age-standardized	Both sexes	Deaths	Rate (per 100k)	Staphylococcus aureus	Methicillin	Attributable	2000	0.429188	0.553062	0.305314
Azerbaijan	Age-standardized	Both sexes	Deaths	Rate (per 100k)	Staphylococcus aureus	Methicillin	Attributable	2000	0.72949	1.22675	0.232234
Burundi	Age-standardized	Both sexes	Deaths	Rate (per 100k)	Staphylococcus aureus	Methicillin	Attributable	2000	1.02862	1.85232	0.204919
Belgium	Age-standardized	Both sexes	Deaths	Rate (per 100k)	Staphylococcus aureus	Methicillin	Attributable	2000	1.42095	1.72343	1.11848
Benin	Age-standardized	Both sexes	Deaths	Rate (per 100k)	Staphylococcus aureus	Methicillin	Attributable	2000	1.42992	2.16829	0.691549
Burkina Faso	Age-standardized	Both sexes	Deaths	Rate (per 100k)	Staphylococcus aureus	Methicillin	Attributable	2000	0.461553	0.791251	0.131855
Bangladesh	Age-standardized	Both sexes	Deaths	Rate (per 100k)	Staphylococcus aureus	Methicillin	Attributable	2000	1.26431	1.97502	0.553589
Bulgaria	Age-standardized	Both sexes	Deaths	Rate (per 100k)	Staphylococcus aureus	Methicillin	Attributable	2000	1.9224	2.311	1.5338
Bahrain	Age-standardized	Both sexes	Deaths	Rate (per 100k)	Staphylococcus aureus	Methicillin	Attributable	2000	2.22436	3.44334	1.00537
Bahamas	Age-standardized	Both sexes	Deaths	Rate (per 100k)	Staphylococcus aureus	Methicillin	Attributable	2000	1.26893	2.07956	0.458289
Bosnia and Herzegovina	Age-standardized	Both sexes	Deaths	Rate (per 100k)	Staphylococcus aureus	Methicillin	Attributable	2000	0.723315	1.14568	0.30095
Belarus	Age-standardized	Both sexes	Deaths	Rate (per 100k)	Staphylococcus aureus	Methicillin	Attributable	2000	0.746558	1.16326	0.329852
Belize	Age-standardized	Both sexes	Deaths	Rate (per 100k)	Staphylococcus aureus	Methicillin	Attributable	2000	1.19649	1.97917	0.413818
Bermuda	Age-standardized	Both sexes	Deaths	Rate (per 100k)	Staphylococcus aureus	Methicillin	Attributable	2000	1.30224	2.10045	0.504035
Bolivia (Plurinational State of)	Age-standardized	Both sexes	Deaths	Rate (per 100k)	Staphylococcus aureus	Methicillin	Attributable	2000	1.35445	1.85256	0.856331
Brazil	Age-standardized	Both sexes	Deaths	Rate (per 100k)	Staphylococcus aureus	Methicillin	Attributable	2000	1.29492	1.79196	0.797887
Barbados	Age-standardized	Both sexes	Deaths	Rate (per 100k)	Staphylococcus aureus	Methicillin	Attributable	2000	1.5349	2.45451	0.615294
Brunei Darussalam	Age-standardized	Both sexes	Deaths	Rate (per 100k)	Staphylococcus aureus	Methicillin	Attributable	2000	0.633462	1.08626	0.180659
Bhutan	Age-standardized	Both sexes	Deaths	Rate (per 100k)	Staphylococcus aureus	Methicillin	Attributable	2000	0.676788	1.16893	0.184644
Botswana	Age-standardized	Both sexes	Deaths	Rate (per 100k)	Staphylococcus aureus	Methicillin	Attributable	2000	1.02765	1.68297	0.372334
Central African Republic	Age-standardized	Both sexes	Deaths	Rate (per 100k)	Staphylococcus aureus	Methicillin	Attributable	2000	2.05613	3.09657	1.0157
Canada	Age-standardized	Both sexes	Deaths	Rate (per 100k)	Staphylococcus aureus	Methicillin	Attributable	2000	0.965027	1.46613	0.463921
Switzerland	Age-standardized	Both sexes	Deaths	Rate (per 100k)	Staphylococcus aureus	Methicillin	Attributable	2000	0.299561	0.463581	0.135541
Chile	Age-standardized	Both sexes	Deaths	Rate (per 100k)	Staphylococcus aureus	Methicillin	Attributable	2000	2.54439	3.24773	1.84105
Côte d'Ivoire	Age-standardized	Both sexes	Deaths	Rate (per 100k)	Staphylococcus aureus	Methicillin	Attributable	2000	0.946356	1.53805	0.354663
Cameroon	Age-standardized	Both sexes	Deaths	Rate (per 100k)	Staphylococcus aureus	Methicillin	Attributable	2000	1.46698	2.27576	0.658206
Democratic Republic of the Congo	Age-standardized	Both sexes	Deaths	Rate (per 100k)	Staphylococcus aureus	Methicillin	Attributable	2000	1.76313	2.51035	1.01591
Congo	Age-standardized	Both sexes	Deaths	Rate (per 100k)	Staphylococcus aureus	Methicillin	Attributable	2000	2.66879	3.69501	1.64256
Cook Islands	Age-standardized	Both sexes	Deaths	Rate (per 100k)	Staphylococcus aureus	Methicillin	Attributable	2000	1.41452	2.31594	0.513101
Colombia	Age-standardized	Both sexes	Deaths	Rate (per 100k)	Staphylococcus aureus	Methicillin	Attributable	2000	1.23585	1.57776	0.893935
Comoros	Age-standardized	Both sexes	Deaths	Rate (per 100k)	Staphylococcus aureus	Methicillin	Attributable	2000	1.20632	2.08215	0.330489
Cabo Verde	Age-standardized	Both sexes	Deaths	Rate (per 100k)	Staphylococcus aureus	Methicillin	Attributable	2000	0.765362	1.32442	0.206299
Costa Rica	Age-standardized	Both sexes	Deaths	Rate (per 100k)	Staphylococcus aureus	Methicillin	Attributable	2000	1.55928	1.99449	1.12407
Cuba	Age-standardized	Both sexes	Deaths	Rate (per 100k)	Staphylococcus aureus	Methicillin	Attributable	2000	1.60365	2.13759	1.06971
Cyprus	Age-standardized	Both sexes	Deaths	Rate (per 100k)	Staphylococcus aureus	Methicillin	Attributable	2000	2.72024	3.33372	2.10676
Czechia	Age-standardized	Both sexes	Deaths	Rate (per 100k)	Staphylococcus aureus	Methicillin	Attributable	2000	0.422282	0.550361	0.294203
Germany	Age-standardized	Both sexes	Deaths	Rate (per 100k)	Staphylococcus aureus	Methicillin	Attributable	2000	0.606405	0.744723	0.468087
Djibouti	Age-standardized	Both sexes	Deaths	Rate (per 100k)	Staphylococcus aureus	Methicillin	Attributable	2000	0.760551	1.37994	0.141164
Dominica	Age-standardized	Both sexes	Deaths	Rate (per 100k)	Staphylococcus aureus	Methicillin	Attributable	2000	1.66294	2.60511	0.72078
Denmark	Age-standardized	Both sexes	Deaths	Rate (per 100k)	Staphylococcus aureus	Methicillin	Attributable	2000	0.118118	0.152831	0.0834051
Dominican Republic	Age-standardized	Both sexes	Deaths	Rate (per 100k)	Staphylococcus aureus	Methicillin	Attributable	2000	0.93188	1.24685	0.616907
Algeria	Age-standardized	Both sexes	Deaths	Rate (per 100k)	Staphylococcus aureus	Methicillin	Attributable	2000	1.52875	2.13135	0.92614
Ecuador	Age-standardized	Both sexes	Deaths	Rate (per 100k)	Staphylococcus aureus	Methicillin	Attributable	2000	1.10625	1.44464	0.767867
Eritrea	Age-standardized	Both sexes	Deaths	Rate (per 100k)	Staphylococcus aureus	Methicillin	Attributable	2000	0.694762	1.1995	0.190022
Spain	Age-standardized	Both sexes	Deaths	Rate (per 100k)	Staphylococcus aureus	Methicillin	Attributable	2000	1.08515	1.40964	0.760654
Estonia	Age-standardized	Both sexes	Deaths	Rate (per 100k)	Staphylococcus aureus	Methicillin	Attributable	2000	0.290985	0.396026	0.185943
Ethiopia	Age-standardized	Both sexes	Deaths	Rate (per 100k)	Staphylococcus aureus	Methicillin	Attributable	2000	1.46454	2.24825	0.680835
Finland	Age-standardized	Both sexes	Deaths	Rate (per 100k)	Staphylococcus aureus	Methicillin	Attributable	2000	0.147345	0.191001	0.103688
Fiji	Age-standardized	Both sexes	Deaths	Rate (per 100k)	Staphylococcus aureus	Methicillin	Attributable	2000	1.09572	1.81824	0.373205
France	Age-standardized	Both sexes	Deaths	Rate (per 100k)	Staphylococcus aureus	Methicillin	Attributable	2000	1.29629	1.6156	0.976981
Micronesia (Federated States of)	Age-standardized	Both sexes	Deaths	Rate (per 100k)	Staphylococcus aureus	Methicillin	Attributable	2000	1.13706	1.94463	0.329497
Gabon	Age-standardized	Both sexes	Deaths	Rate (per 100k)	Staphylococcus aureus	Methicillin	Attributable	2000	1.3025	2.10066	0.504341
United Kingdom	Age-standardized	Both sexes	Deaths	Rate (per 100k)	Staphylococcus aureus	Methicillin	Attributable	2000	2.37205	2.80373	1.94038
Georgia	Age-standardized	Both sexes	Deaths	Rate (per 100k)	Staphylococcus aureus	Methicillin	Attributable	2000	1.03267	1.54909	0.516255
Ghana	Age-standardized	Both sexes	Deaths	Rate (per 100k)	Staphylococcus aureus	Methicillin	Attributable	2000	1.40245	2.153	0.651902
Guinea	Age-standardized	Both sexes	Deaths	Rate (per 100k)	Staphylococcus aureus	Methicillin	Attributable	2000	1.50843	2.54858	0.468272
Gambia	Age-standardized	Both sexes	Deaths	Rate (per 100k)	Staphylococcus aureus	Methicillin	Attributable	2000	1.41243	2.46577	0.359082
Guinea-Bissau	Age-standardized	Both sexes	Deaths	Rate (per 100k)	Staphylococcus aureus	Methicillin	Attributable	2000	1.34447	2.37677	0.312161
Equatorial Guinea	Age-standardized	Both sexes	Deaths	Rate (per 100k)	Staphylococcus aureus	Methicillin	Attributable	2000	1.46525	2.34941	0.581084
Greece	Age-standardized	Both sexes	Deaths	Rate (per 100k)	Staphylococcus aureus	Methicillin	Attributable	2000	1.92596	2.29323	1.55869
Grenada	Age-standardized	Both sexes	Deaths	Rate (per 100k)	Staphylococcus aureus	Methicillin	Attributable	2000	1.74347	2.78653	0.700411
Greenland	Age-standardized	Both sexes	Deaths	Rate (per 100k)	Staphylococcus aureus	Methicillin	Attributable	2000	1.32015	2.19285	0.447454
Guatemala	Age-standardized	Both sexes	Deaths	Rate (per 100k)	Staphylococcus aureus	Methicillin	Attributable	2000	3.29408	3.81212	2.77603
Guam	Age-standardized	Both sexes	Deaths	Rate (per 100k)	Staphylococcus aureus	Methicillin	Attributable	2000	0.672345	1.10192	0.242772
Guyana	Age-standardized	Both sexes	Deaths	Rate (per 100k)	Staphylococcus aureus	Methicillin	Attributable	2000	1.37532	2.22116	0.529468
Honduras	Age-standardized	Both sexes	Deaths	Rate (per 100k)	Staphylococcus aureus	Methicillin	Attributable	2000	0.605802	0.877441	0.334164
Croatia	Age-standardized	Both sexes	Deaths	Rate (per 100k)	Staphylococcus aureus	Methicillin	Attributable	2000	1.4534	1.79176	1.11504
Haiti	Age-standardized	Both sexes	Deaths	Rate (per 100k)	Staphylococcus aureus	Methicillin	Attributable	2000	1.2062	1.90092	0.511467
Hungary	Age-standardized	Both sexes	Deaths	Rate (per 100k)	Staphylococcus aureus	Methicillin	Attributable	2000	0.908063	1.24658	0.569542
Indonesia	Age-standardized	Both sexes	Deaths	Rate (per 100k)	Staphylococcus aureus	Methicillin	Attributable	2000	1.0056	1.58584	0.42536
India	Age-standardized	Both sexes	Deaths	Rate (per 100k)	Staphylococcus aureus	Methicillin	Attributable	2000	1.7802	2.21434	1.34606
Ireland	Age-standardized	Both sexes	Deaths	Rate (per 100k)	Staphylococcus aureus	Methicillin	Attributable	2000	2.96389	3.50841	2.41936
Iran (Islamic Republic of)	Age-standardized	Both sexes	Deaths	Rate (per 100k)	Staphylococcus aureus	Methicillin	Attributable	2000	1.60612	2.07717	1.13508
Iraq	Age-standardized	Both sexes	Deaths	Rate (per 100k)	Staphylococcus aureus	Methicillin	Attributable	2000	2.08022	2.49056	1.66988
Iceland	Age-standardized	Both sexes	Deaths	Rate (per 100k)	Staphylococcus aureus	Methicillin	Attributable	2000	0.695968	1.25168	0.140257
Israel	Age-standardized	Both sexes	Deaths	Rate (per 100k)	Staphylococcus aureus	Methicillin	Attributable	2000	1.5591	2.31255	0.805657
Italy	Age-standardized	Both sexes	Deaths	Rate (per 100k)	Staphylococcus aureus	Methicillin	Attributable	2000	1.33607	1.67237	0.99977
Jamaica	Age-standardized	Both sexes	Deaths	Rate (per 100k)	Staphylococcus aureus	Methicillin	Attributable	2000	1.19104	1.89841	0.48367
Jordan	Age-standardized	Both sexes	Deaths	Rate (per 100k)	Staphylococcus aureus	Methicillin	Attributable	2000	1.73602	2.56038	0.911663
Japan	Age-standardized	Both sexes	Deaths	Rate (per 100k)	Staphylococcus aureus	Methicillin	Attributable	2000	1.80638	2.31899	1.29377
Kazakhstan	Age-standardized	Both sexes	Deaths	Rate (per 100k)	Staphylococcus aureus	Methicillin	Attributable	2000	1.31713	2.15789	0.476377
Kenya	Age-standardized	Both sexes	Deaths	Rate (per 100k)	Staphylococcus aureus	Methicillin	Attributable	2000	1.24734	1.77301	0.721665
Kyrgyzstan	Age-standardized	Both sexes	Deaths	Rate (per 100k)	Staphylococcus aureus	Methicillin	Attributable	2000	0.943905	1.62591	0.261903
Cambodia	Age-standardized	Both sexes	Deaths	Rate (per 100k)	Staphylococcus aureus	Methicillin	Attributable	2000	0.653356	1.03744	0.269271
Kiribati	Age-standardized	Both sexes	Deaths	Rate (per 100k)	Staphylococcus aureus	Methicillin	Attributable	2000	1.29154	2.15093	0.432143
Saint Kitts and Nevis	Age-standardized	Both sexes	Deaths	Rate (per 100k)	Staphylococcus aureus	Methicillin	Attributable	2000	1.81545	2.87168	0.759221
Republic of Korea	Age-standardized	Both sexes	Deaths	Rate (per 100k)	Staphylococcus aureus	Methicillin	Attributable	2000	1.64616	2.39984	0.892475
Kuwait	Age-standardized	Both sexes	Deaths	Rate (per 100k)	Staphylococcus aureus	Methicillin	Attributable	2000	1.33937	1.73055	0.948186
Lao People's Democratic Republic	Age-standardized	Both sexes	Deaths	Rate (per 100k)	Staphylococcus aureus	Methicillin	Attributable	2000	0.281341	0.42841	0.134272
Lebanon	Age-standardized	Both sexes	Deaths	Rate (per 100k)	Staphylococcus aureus	Methicillin	Attributable	2000	0.502232	0.843621	0.160844
Liberia	Age-standardized	Both sexes	Deaths	Rate (per 100k)	Staphylococcus aureus	Methicillin	Attributable	2000	0.920003	1.65185	0.188158
Libya	Age-standardized	Both sexes	Deaths	Rate (per 100k)	Staphylococcus aureus	Methicillin	Attributable	2000	0.734318	1.11529	0.353346
Saint Lucia	Age-standardized	Both sexes	Deaths	Rate (per 100k)	Staphylococcus aureus	Methicillin	Attributable	2000	1.61664	2.48513	0.748149
Sri Lanka	Age-standardized	Both sexes	Deaths	Rate (per 100k)	Staphylococcus aureus	Methicillin	Attributable	2000	1.24392	1.88664	0.601208
Lesotho	Age-standardized	Both sexes	Deaths	Rate (per 100k)	Staphylococcus aureus	Methicillin	Attributable	2000	0.305911	0.526878	0.0849434
Lithuania	Age-standardized	Both sexes	Deaths	Rate (per 100k)	Staphylococcus aureus	Methicillin	Attributable	2000	0.404486	0.535789	0.273184
Luxembourg	Age-standardized	Both sexes	Deaths	Rate (per 100k)	Staphylococcus aureus	Methicillin	Attributable	2000	1.08907	1.35161	0.826529
Latvia	Age-standardized	Both sexes	Deaths	Rate (per 100k)	Staphylococcus aureus	Methicillin	Attributable	2000	0.906773	1.19433	0.619216
Morocco	Age-standardized	Both sexes	Deaths	Rate (per 100k)	Staphylococcus aureus	Methicillin	Attributable	2000	0.481804	0.693265	0.270342
Monaco	Age-standardized	Both sexes	Deaths	Rate (per 100k)	Staphylococcus aureus	Methicillin	Attributable	2000	0.861545	1.48799	0.235096
Republic of Moldova	Age-standardized	Both sexes	Deaths	Rate (per 100k)	Staphylococcus aureus	Methicillin	Attributable	2000	1.08666	1.75443	0.418888
Madagascar	Age-standardized	Both sexes	Deaths	Rate (per 100k)	Staphylococcus aureus	Methicillin	Attributable	2000	0.401255	0.597706	0.204803
Maldives	Age-standardized	Both sexes	Deaths	Rate (per 100k)	Staphylococcus aureus	Methicillin	Attributable	2000	1.02911	1.72204	0.336185
Mexico	Age-standardized	Both sexes	Deaths	Rate (per 100k)	Staphylococcus aureus	Methicillin	Attributable	2000	1.57881	2.06368	1.09394
Marshall Islands	Age-standardized	Both sexes	Deaths	Rate (per 100k)	Staphylococcus aureus	Methicillin	Attributable	2000	1.36231	2.24057	0.484047
North Macedonia	Age-standardized	Both sexes	Deaths	Rate (per 100k)	Staphylococcus aureus	Methicillin	Attributable	2000	2.26144	3.22193	1.30096
Mali	Age-standardized	Both sexes	Deaths	Rate (per 100k)	Staphylococcus aureus	Methicillin	Attributable	2000	2.09712	2.96527	1.22898
Malta	Age-standardized	Both sexes	Deaths	Rate (per 100k)	Staphylococcus aureus	Methicillin	Attributable	2000	1.87653	2.20677	1.5463
Myanmar	Age-standardized	Both sexes	Deaths	Rate (per 100k)	Staphylococcus aureus	Methicillin	Attributable	2000	2.71699	3.60755	1.82643
Montenegro	Age-standardized	Both sexes	Deaths	Rate (per 100k)	Staphylococcus aureus	Methicillin	Attributable	2000	0.829994	1.3524	0.307592
Mongolia	Age-standardized	Both sexes	Deaths	Rate (per 100k)	Staphylococcus aureus	Methicillin	Attributable	2000	1.99817	2.88498	1.11137
Northern Mariana Islands	Age-standardized	Both sexes	Deaths	Rate (per 100k)	Staphylococcus aureus	Methicillin	Attributable	2000	1.11116	1.79774	0.424578
Mozambique	Age-standardized	Both sexes	Deaths	Rate (per 100k)	Staphylococcus aureus	Methicillin	Attributable	2000	1.05039	1.72746	0.373313
Mauritania	Age-standardized	Both sexes	Deaths	Rate (per 100k)	Staphylococcus aureus	Methicillin	Attributable	2000	1.00671	1.65222	0.361202
Mauritius	Age-standardized	Both sexes	Deaths	Rate (per 100k)	Staphylococcus aureus	Methicillin	Attributable	2000	0.876951	1.51344	0.240466
Malawi	Age-standardized	Both sexes	Deaths	Rate (per 100k)	Staphylococcus aureus	Methicillin	Attributable	2000	1.51328	2.31037	0.716189
Malaysia	Age-standardized	Both sexes	Deaths	Rate (per 100k)	Staphylococcus aureus	Methicillin	Attributable	2000	1.65578	1.94505	1.3665
Namibia	Age-standardized	Both sexes	Deaths	Rate (per 100k)	Staphylococcus aureus	Methicillin	Attributable	2000	1.08816	1.97502	0.201307
Niger	Age-standardized	Both sexes	Deaths	Rate (per 100k)	Staphylococcus aureus	Methicillin	Attributable	2000	1.30919	2.21209	0.406284
Nigeria	Age-standardized	Both sexes	Deaths	Rate (per 100k)	Staphylococcus aureus	Methicillin	Attributable	2000	2.00166	2.60895	1.39438
Nicaragua	Age-standardized	Both sexes	Deaths	Rate (per 100k)	Staphylococcus aureus	Methicillin	Attributable	2000	0.80164	1.14806	0.455217
Niue	Age-standardized	Both sexes	Deaths	Rate (per 100k)	Staphylococcus aureus	Methicillin	Attributable	2000	1.37086	2.30926	0.432463
Netherlands	Age-standardized	Both sexes	Deaths	Rate (per 100k)	Staphylococcus aureus	Methicillin	Attributable	2000	0.105691	0.13771	0.0736722
Norway	Age-standardized	Both sexes	Deaths	Rate (per 100k)	Staphylococcus aureus	Methicillin	Attributable	2000	0.302202	0.514295	0.0901095
Nepal	Age-standardized	Both sexes	Deaths	Rate (per 100k)	Staphylococcus aureus	Methicillin	Attributable	2000	1.64231	2.3873	0.897324
Nauru	Age-standardized	Both sexes	Deaths	Rate (per 100k)	Staphylococcus aureus	Methicillin	Attributable	2000	1.5428	2.60336	0.482245
New Zealand	Age-standardized	Both sexes	Deaths	Rate (per 100k)	Staphylococcus aureus	Methicillin	Attributable	2000	0.268037	0.327001	0.209072
Oman	Age-standardized	Both sexes	Deaths	Rate (per 100k)	Staphylococcus aureus	Methicillin	Attributable	2000	0.61731	1.06619	0.168436
Pakistan	Age-standardized	Both sexes	Deaths	Rate (per 100k)	Staphylococcus aureus	Methicillin	Attributable	2000	1.42463	1.80888	1.04037
Panama	Age-standardized	Both sexes	Deaths	Rate (per 100k)	Staphylococcus aureus	Methicillin	Attributable	2000	0.87723	1.17384	0.580625
Peru	Age-standardized	Both sexes	Deaths	Rate (per 100k)	Staphylococcus aureus	Methicillin	Attributable	2000	2.24191	2.77248	1.71134
Philippines	Age-standardized	Both sexes	Deaths	Rate (per 100k)	Staphylococcus aureus	Methicillin	Attributable	2000	1.9078	2.49502	1.32059
Palau	Age-standardized	Both sexes	Deaths	Rate (per 100k)	Staphylococcus aureus	Methicillin	Attributable	2000	1.46193	2.44288	0.480994
Papua New Guinea	Age-standardized	Both sexes	Deaths	Rate (per 100k)	Staphylococcus aureus	Methicillin	Attributable	2000	0.914201	1.5778	0.250606
Poland	Age-standardized	Both sexes	Deaths	Rate (per 100k)	Staphylococcus aureus	Methicillin	Attributable	2000	1.09631	1.34936	0.84326
Puerto Rico	Age-standardized	Both sexes	Deaths	Rate (per 100k)	Staphylococcus aureus	Methicillin	Attributable	2000	1.60175	2.47628	0.72722
Democratic People's Republic of Korea	Age-standardized	Both sexes	Deaths	Rate (per 100k)	Staphylococcus aureus	Methicillin	Attributable	2000	2.14016	3.70163	0.578699
Portugal	Age-standardized	Both sexes	Deaths	Rate (per 100k)	Staphylococcus aureus	Methicillin	Attributable	2000	1.96741	2.40411	1.53071
Paraguay	Age-standardized	Both sexes	Deaths	Rate (per 100k)	Staphylococcus aureus	Methicillin	Attributable	2000	0.980579	1.27697	0.684189
Palestine	Age-standardized	Both sexes	Deaths	Rate (per 100k)	Staphylococcus aureus	Methicillin	Attributable	2000	2.03846	2.983	1.09392
Qatar	Age-standardized	Both sexes	Deaths	Rate (per 100k)	Staphylococcus aureus	Methicillin	Attributable	2000	2.52542	3.71179	1.33905
Romania	Age-standardized	Both sexes	Deaths	Rate (per 100k)	Staphylococcus aureus	Methicillin	Attributable	2000	1.96968	2.53019	1.40918
Russian Federation	Age-standardized	Both sexes	Deaths	Rate (per 100k)	Staphylococcus aureus	Methicillin	Attributable	2000	1.23569	1.79332	0.67807
Rwanda	Age-standardized	Both sexes	Deaths	Rate (per 100k)	Staphylococcus aureus	Methicillin	Attributable	2000	3.09112	4.37527	1.80697
Saudi Arabia	Age-standardized	Both sexes	Deaths	Rate (per 100k)	Staphylococcus aureus	Methicillin	Attributable	2000	1.08558	1.63767	0.53349
Senegal	Age-standardized	Both sexes	Deaths	Rate (per 100k)	Staphylococcus aureus	Methicillin	Attributable	2000	1.52445	2.13283	0.916074
Singapore	Age-standardized	Both sexes	Deaths	Rate (per 100k)	Staphylococcus aureus	Methicillin	Attributable	2000	0.447089	0.716616	0.177562
Solomon Islands	Age-standardized	Both sexes	Deaths	Rate (per 100k)	Staphylococcus aureus	Methicillin	Attributable	2000	1.06364	1.82908	0.298199
Sierra Leone	Age-standardized	Both sexes	Deaths	Rate (per 100k)	Staphylococcus aureus	Methicillin	Attributable	2000	1.29121	2.21119	0.371223
El Salvador	Age-standardized	Both sexes	Deaths	Rate (per 100k)	Staphylococcus aureus	Methicillin	Attributable	2000	1.4206	1.65298	1.18821
San Marino	Age-standardized	Both sexes	Deaths	Rate (per 100k)	Staphylococcus aureus	Methicillin	Attributable	2000	0.873063	1.50791	0.238215
Somalia	Age-standardized	Both sexes	Deaths	Rate (per 100k)	Staphylococcus aureus	Methicillin	Attributable	2000	2.15891	3.31006	1.00776
Serbia	Age-standardized	Both sexes	Deaths	Rate (per 100k)	Staphylococcus aureus	Methicillin	Attributable	2000	1.81546	2.63655	0.994361
South Sudan	Age-standardized	Both sexes	Deaths	Rate (per 100k)	Staphylococcus aureus	Methicillin	Attributable	2000	0.954768	1.70965	0.199886
Sao Tome and Principe	Age-standardized	Both sexes	Deaths	Rate (per 100k)	Staphylococcus aureus	Methicillin	Attributable	2000	1.15783	2.05781	0.257853
Suriname	Age-standardized	Both sexes	Deaths	Rate (per 100k)	Staphylococcus aureus	Methicillin	Attributable	2000	0.873073	1.49731	0.248839
Slovakia	Age-standardized	Both sexes	Deaths	Rate (per 100k)	Staphylococcus aureus	Methicillin	Attributable	2000	0.787703	1.11219	0.463213
Slovenia	Age-standardized	Both sexes	Deaths	Rate (per 100k)	Staphylococcus aureus	Methicillin	Attributable	2000	0.820683	1.00825	0.633121
Sweden	Age-standardized	Both sexes	Deaths	Rate (per 100k)	Staphylococcus aureus	Methicillin	Attributable	2000	0.168833	0.226688	0.110978
Eswatini	Age-standardized	Both sexes	Deaths	Rate (per 100k)	Staphylococcus aureus	Methicillin	Attributable	2000	0.63351	1.09027	0.176746
Seychelles	Age-standardized	Both sexes	Deaths	Rate (per 100k)	Staphylococcus aureus	Methicillin	Attributable	2000	0.902392	1.58715	0.217633
Syrian Arab Republic	Age-standardized	Both sexes	Deaths	Rate (per 100k)	Staphylococcus aureus	Methicillin	Attributable	2000	1.6584	2.42267	0.894135
Chad	Age-standardized	Both sexes	Deaths	Rate (per 100k)	Staphylococcus aureus	Methicillin	Attributable	2000	1.37246	2.29857	0.446357
Togo	Age-standardized	Both sexes	Deaths	Rate (per 100k)	Staphylococcus aureus	Methicillin	Attributable	2000	0.975623	1.64108	0.31017
Thailand	Age-standardized	Both sexes	Deaths	Rate (per 100k)	Staphylococcus aureus	Methicillin	Attributable	2000	0.983485	1.49983	0.467137
Tajikistan	Age-standardized	Both sexes	Deaths	Rate (per 100k)	Staphylococcus aureus	Methicillin	Attributable	2000	0.99523	1.67176	0.318701
Tokelau	Age-standardized	Both sexes	Deaths	Rate (per 100k)	Staphylococcus aureus	Methicillin	Attributable	2000	1.42416	2.31207	0.536257
Turkmenistan	Age-standardized	Both sexes	Deaths	Rate (per 100k)	Staphylococcus aureus	Methicillin	Attributable	2000	0.842589	1.45565	0.229522
Timor-Leste	Age-standardized	Both sexes	Deaths	Rate (per 100k)	Staphylococcus aureus	Methicillin	Attributable	2000	0.668363	1.21066	0.126069
Tonga	Age-standardized	Both sexes	Deaths	Rate (per 100k)	Staphylococcus aureus	Methicillin	Attributable	2000	1.0163	1.75745	0.275152
Trinidad and Tobago	Age-standardized	Both sexes	Deaths	Rate (per 100k)	Staphylococcus aureus	Methicillin	Attributable	2000	1.50274	2.33078	0.674703
Tunisia	Age-standardized	Both sexes	Deaths	Rate (per 100k)	Staphylococcus aureus	Methicillin	Attributable	2000	0.983671	1.389	0.578345
Türkiye	Age-standardized	Both sexes	Deaths	Rate (per 100k)	Staphylococcus aureus	Methicillin	Attributable	2000	1.30792	1.82265	0.793194
Tuvalu	Age-standardized	Both sexes	Deaths	Rate (per 100k)	Staphylococcus aureus	Methicillin	Attributable	2000	1.15203	2.0086	0.295461
Taiwan (Province of China)	Age-standardized	Both sexes	Deaths	Rate (per 100k)	Staphylococcus aureus	Methicillin	Attributable	2000	2.89844	3.44916	2.34771
United Republic of Tanzania	Age-standardized	Both sexes	Deaths	Rate (per 100k)	Staphylococcus aureus	Methicillin	Attributable	2000	0.141153	0.24034	0.0419648
Uganda	Age-standardized	Both sexes	Deaths	Rate (per 100k)	Staphylococcus aureus	Methicillin	Attributable	2000	1.51577	2.19003	0.841513
Ukraine	Age-standardized	Both sexes	Deaths	Rate (per 100k)	Staphylococcus aureus	Methicillin	Attributable	2000	0.831455	1.40093	0.261976
Uruguay	Age-standardized	Both sexes	Deaths	Rate (per 100k)	Staphylococcus aureus	Methicillin	Attributable	2000	2.2706	2.89514	1.64606
United States of America	Age-standardized	Both sexes	Deaths	Rate (per 100k)	Staphylococcus aureus	Methicillin	Attributable	2000	2.12575	2.78608	1.46542
Uzbekistan	Age-standardized	Both sexes	Deaths	Rate (per 100k)	Staphylococcus aureus	Methicillin	Attributable	2000	0.756268	1.29063	0.221907
Saint Vincent and the Grenadines	Age-standardized	Both sexes	Deaths	Rate (per 100k)	Staphylococcus aureus	Methicillin	Attributable	2000	1.42848	2.29081	0.566155
Venezuela (Bolivarian Republic of)	Age-standardized	Both sexes	Deaths	Rate (per 100k)	Staphylococcus aureus	Methicillin	Attributable	2000	0.686165	0.898684	0.473646
United States Virgin Islands	Age-standardized	Both sexes	Deaths	Rate (per 100k)	Staphylococcus aureus	Methicillin	Attributable	2000	1.41381	2.25606	0.571568
Viet Nam	Age-standardized	Both sexes	Deaths	Rate (per 100k)	Staphylococcus aureus	Methicillin	Attributable	2000	1.26815	1.84498	0.691325
Vanuatu	Age-standardized	Both sexes	Deaths	Rate (per 100k)	Staphylococcus aureus	Methicillin	Attributable	2000	0.887836	1.5485	0.22717
Samoa	Age-standardized	Both sexes	Deaths	Rate (per 100k)	Staphylococcus aureus	Methicillin	Attributable	2000	0.847514	1.47502	0.22001
Yemen	Age-standardized	Both sexes	Deaths	Rate (per 100k)	Staphylococcus aureus	Methicillin	Attributable	2000	1.11392	1.79485	0.432999
South Africa	Age-standardized	Both sexes	Deaths	Rate (per 100k)	Staphylococcus aureus	Methicillin	Attributable	2000	1.70702	2.11167	1.30237
Zambia	Age-standardized	Both sexes	Deaths	Rate (per 100k)	Staphylococcus aureus	Methicillin	Attributable	2000	1.52045	2.53808	0.502816
Zimbabwe	Age-standardized	Both sexes	Deaths	Rate (per 100k)	Staphylococcus aureus	Methicillin	Attributable	2000	1.14925	1.99341	0.305093
Egypt	Age-standardized	Both sexes	Deaths	Rate (per 100k)	Staphylococcus aureus	Methicillin	Attributable	2000	2.84023	3.69814	1.98233
Sudan	Age-standardized	Both sexes	Deaths	Rate (per 100k)	Staphylococcus aureus	Methicillin	Attributable	2000	0.810581	1.24408	0.37708
China	Age-standardized	Both sexes	Deaths	Rate (per 100k)	Staphylococcus aureus	Methicillin	Attributable	2000	2.44099	2.84894	2.03303
Afghanistan	Age-standardized	Both sexes	Deaths	Rate (per 100k)	Staphylococcus aureus	Methicillin	Attributable	2001	2.40509	3.40226	1.40792
Angola	Age-standardized	Both sexes	Deaths	Rate (per 100k)	Staphylococcus aureus	Methicillin	Attributable	2001	0.181203	0.310664	0.0517414
Albania	Age-standardized	Both sexes	Deaths	Rate (per 100k)	Staphylococcus aureus	Methicillin	Attributable	2001	0.838717	1.40548	0.271953
Andorra	Age-standardized	Both sexes	Deaths	Rate (per 100k)	Staphylococcus aureus	Methicillin	Attributable	2001	0.761705	1.33109	0.192318
United Arab Emirates	Age-standardized	Both sexes	Deaths	Rate (per 100k)	Staphylococcus aureus	Methicillin	Attributable	2001	1.21248	1.97855	0.446419
Argentina	Age-standardized	Both sexes	Deaths	Rate (per 100k)	Staphylococcus aureus	Methicillin	Attributable	2001	2.24061	2.65081	1.83042
Armenia	Age-standardized	Both sexes	Deaths	Rate (per 100k)	Staphylococcus aureus	Methicillin	Attributable	2001	1.1588	1.87615	0.441439
American Samoa	Age-standardized	Both sexes	Deaths	Rate (per 100k)	Staphylococcus aureus	Methicillin	Attributable	2001	1.30208	2.15358	0.450582
Antigua and Barbuda	Age-standardized	Both sexes	Deaths	Rate (per 100k)	Staphylococcus aureus	Methicillin	Attributable	2001	1.30057	2.15199	0.449155
Australia	Age-standardized	Both sexes	Deaths	Rate (per 100k)	Staphylococcus aureus	Methicillin	Attributable	2001	0.69957	0.872789	0.526352
Austria	Age-standardized	Both sexes	Deaths	Rate (per 100k)	Staphylococcus aureus	Methicillin	Attributable	2001	0.445622	0.56592	0.325324
Azerbaijan	Age-standardized	Both sexes	Deaths	Rate (per 100k)	Staphylococcus aureus	Methicillin	Attributable	2001	0.73627	1.23079	0.241747
Burundi	Age-standardized	Both sexes	Deaths	Rate (per 100k)	Staphylococcus aureus	Methicillin	Attributable	2001	1.04025	1.8746	0.20589
Belgium	Age-standardized	Both sexes	Deaths	Rate (per 100k)	Staphylococcus aureus	Methicillin	Attributable	2001	1.55985	1.87487	1.24483
Benin	Age-standardized	Both sexes	Deaths	Rate (per 100k)	Staphylococcus aureus	Methicillin	Attributable	2001	1.45854	2.17214	0.74494
Burkina Faso	Age-standardized	Both sexes	Deaths	Rate (per 100k)	Staphylococcus aureus	Methicillin	Attributable	2001	0.446764	0.766474	0.127053
Bangladesh	Age-standardized	Both sexes	Deaths	Rate (per 100k)	Staphylococcus aureus	Methicillin	Attributable	2001	1.27575	1.97949	0.572
Bulgaria	Age-standardized	Both sexes	Deaths	Rate (per 100k)	Staphylococcus aureus	Methicillin	Attributable	2001	1.91649	2.27057	1.56242
Bahrain	Age-standardized	Both sexes	Deaths	Rate (per 100k)	Staphylococcus aureus	Methicillin	Attributable	2001	2.26751	3.49681	1.0382
Bahamas	Age-standardized	Both sexes	Deaths	Rate (per 100k)	Staphylococcus aureus	Methicillin	Attributable	2001	1.3712	2.23963	0.502763
Bosnia and Herzegovina	Age-standardized	Both sexes	Deaths	Rate (per 100k)	Staphylococcus aureus	Methicillin	Attributable	2001	0.674157	1.05785	0.290461
Belarus	Age-standardized	Both sexes	Deaths	Rate (per 100k)	Staphylococcus aureus	Methicillin	Attributable	2001	0.815526	1.24469	0.386358
Belize	Age-standardized	Both sexes	Deaths	Rate (per 100k)	Staphylococcus aureus	Methicillin	Attributable	2001	1.19619	1.97962	0.41276
Bermuda	Age-standardized	Both sexes	Deaths	Rate (per 100k)	Staphylococcus aureus	Methicillin	Attributable	2001	1.26204	2.05415	0.469936
Bolivia (Plurinational State of)	Age-standardized	Both sexes	Deaths	Rate (per 100k)	Staphylococcus aureus	Methicillin	Attributable	2001	1.43331	1.91858	0.948033
Brazil	Age-standardized	Both sexes	Deaths	Rate (per 100k)	Staphylococcus aureus	Methicillin	Attributable	2001	1.36045	1.84961	0.871282
Barbados	Age-standardized	Both sexes	Deaths	Rate (per 100k)	Staphylococcus aureus	Methicillin	Attributable	2001	1.54821	2.47174	0.624686
Brunei Darussalam	Age-standardized	Both sexes	Deaths	Rate (per 100k)	Staphylococcus aureus	Methicillin	Attributable	2001	0.649434	1.09409	0.204776
Bhutan	Age-standardized	Both sexes	Deaths	Rate (per 100k)	Staphylococcus aureus	Methicillin	Attributable	2001	0.657746	1.12237	0.193127
Botswana	Age-standardized	Both sexes	Deaths	Rate (per 100k)	Staphylococcus aureus	Methicillin	Attributable	2001	1.07348	1.7225	0.424471
Central African Republic	Age-standardized	Both sexes	Deaths	Rate (per 100k)	Staphylococcus aureus	Methicillin	Attributable	2001	1.94691	2.93266	0.961147
Canada	Age-standardized	Both sexes	Deaths	Rate (per 100k)	Staphylococcus aureus	Methicillin	Attributable	2001	0.971319	1.45233	0.490311
Switzerland	Age-standardized	Both sexes	Deaths	Rate (per 100k)	Staphylococcus aureus	Methicillin	Attributable	2001	0.302985	0.463067	0.142903
Chile	Age-standardized	Both sexes	Deaths	Rate (per 100k)	Staphylococcus aureus	Methicillin	Attributable	2001	2.6706	3.33816	2.00303
Côte d'Ivoire	Age-standardized	Both sexes	Deaths	Rate (per 100k)	Staphylococcus aureus	Methicillin	Attributable	2001	0.939824	1.5348	0.344849
Cameroon	Age-standardized	Both sexes	Deaths	Rate (per 100k)	Staphylococcus aureus	Methicillin	Attributable	2001	1.50163	2.302	0.701261
Democratic Republic of the Congo	Age-standardized	Both sexes	Deaths	Rate (per 100k)	Staphylococcus aureus	Methicillin	Attributable	2001	1.75313	2.48059	1.02567
Congo	Age-standardized	Both sexes	Deaths	Rate (per 100k)	Staphylococcus aureus	Methicillin	Attributable	2001	2.67325	3.61722	1.72928
Cook Islands	Age-standardized	Both sexes	Deaths	Rate (per 100k)	Staphylococcus aureus	Methicillin	Attributable	2001	1.40793	2.31071	0.50514
Colombia	Age-standardized	Both sexes	Deaths	Rate (per 100k)	Staphylococcus aureus	Methicillin	Attributable	2001	1.26947	1.59073	0.948207
Comoros	Age-standardized	Both sexes	Deaths	Rate (per 100k)	Staphylococcus aureus	Methicillin	Attributable	2001	1.21666	2.08568	0.347646
Cabo Verde	Age-standardized	Both sexes	Deaths	Rate (per 100k)	Staphylococcus aureus	Methicillin	Attributable	2001	0.761402	1.31844	0.20436
Costa Rica	Age-standardized	Both sexes	Deaths	Rate (per 100k)	Staphylococcus aureus	Methicillin	Attributable	2001	1.67369	2.09762	1.24976
Cuba	Age-standardized	Both sexes	Deaths	Rate (per 100k)	Staphylococcus aureus	Methicillin	Attributable	2001	1.49774	2.03136	0.964112
Cyprus	Age-standardized	Both sexes	Deaths	Rate (per 100k)	Staphylococcus aureus	Methicillin	Attributable	2001	2.62403	3.19321	2.05486
Czechia	Age-standardized	Both sexes	Deaths	Rate (per 100k)	Staphylococcus aureus	Methicillin	Attributable	2001	0.4476	0.574347	0.320853
Germany	Age-standardized	Both sexes	Deaths	Rate (per 100k)	Staphylococcus aureus	Methicillin	Attributable	2001	0.676164	0.821433	0.530895
Djibouti	Age-standardized	Both sexes	Deaths	Rate (per 100k)	Staphylococcus aureus	Methicillin	Attributable	2001	0.7867	1.42392	0.149483
Dominica	Age-standardized	Both sexes	Deaths	Rate (per 100k)	Staphylococcus aureus	Methicillin	Attributable	2001	1.69316	2.64031	0.746005
Denmark	Age-standardized	Both sexes	Deaths	Rate (per 100k)	Staphylococcus aureus	Methicillin	Attributable	2001	0.121814	0.156983	0.0866439
Dominican Republic	Age-standardized	Both sexes	Deaths	Rate (per 100k)	Staphylococcus aureus	Methicillin	Attributable	2001	0.9341	1.22598	0.642225
Algeria	Age-standardized	Both sexes	Deaths	Rate (per 100k)	Staphylococcus aureus	Methicillin	Attributable	2001	1.53072	2.116	0.945435
Ecuador	Age-standardized	Both sexes	Deaths	Rate (per 100k)	Staphylococcus aureus	Methicillin	Attributable	2001	1.19186	1.5332	0.850511
Eritrea	Age-standardized	Both sexes	Deaths	Rate (per 100k)	Staphylococcus aureus	Methicillin	Attributable	2001	0.697225	1.20162	0.192827
Spain	Age-standardized	Both sexes	Deaths	Rate (per 100k)	Staphylococcus aureus	Methicillin	Attributable	2001	1.20905	1.54108	0.877029
Estonia	Age-standardized	Both sexes	Deaths	Rate (per 100k)	Staphylococcus aureus	Methicillin	Attributable	2001	0.307155	0.410692	0.203619
Ethiopia	Age-standardized	Both sexes	Deaths	Rate (per 100k)	Staphylococcus aureus	Methicillin	Attributable	2001	1.45989	2.20529	0.714499
Finland	Age-standardized	Both sexes	Deaths	Rate (per 100k)	Staphylococcus aureus	Methicillin	Attributable	2001	0.144751	0.185573	0.103929
Fiji	Age-standardized	Both sexes	Deaths	Rate (per 100k)	Staphylococcus aureus	Methicillin	Attributable	2001	1.15276	1.9057	0.399826
France	Age-standardized	Both sexes	Deaths	Rate (per 100k)	Staphylococcus aureus	Methicillin	Attributable	2001	1.30977	1.61671	1.00283
Micronesia (Federated States of)	Age-standardized	Both sexes	Deaths	Rate (per 100k)	Staphylococcus aureus	Methicillin	Attributable	2001	1.1165	1.91189	0.321109
Gabon	Age-standardized	Both sexes	Deaths	Rate (per 100k)	Staphylococcus aureus	Methicillin	Attributable	2001	1.41848	2.24537	0.591585
United Kingdom	Age-standardized	Both sexes	Deaths	Rate (per 100k)	Staphylococcus aureus	Methicillin	Attributable	2001	2.33495	2.73461	1.93529
Georgia	Age-standardized	Both sexes	Deaths	Rate (per 100k)	Staphylococcus aureus	Methicillin	Attributable	2001	1.07432	1.55809	0.590554
Ghana	Age-standardized	Both sexes	Deaths	Rate (per 100k)	Staphylococcus aureus	Methicillin	Attributable	2001	1.3234	2.02586	0.620934
Guinea	Age-standardized	Both sexes	Deaths	Rate (per 100k)	Staphylococcus aureus	Methicillin	Attributable	2001	1.40302	2.39261	0.413424
Gambia	Age-standardized	Both sexes	Deaths	Rate (per 100k)	Staphylococcus aureus	Methicillin	Attributable	2001	1.40759	2.46659	0.348599
Guinea-Bissau	Age-standardized	Both sexes	Deaths	Rate (per 100k)	Staphylococcus aureus	Methicillin	Attributable	2001	1.30802	2.31656	0.299477
Equatorial Guinea	Age-standardized	Both sexes	Deaths	Rate (per 100k)	Staphylococcus aureus	Methicillin	Attributable	2001	1.45483	2.31959	0.590066
Greece	Age-standardized	Both sexes	Deaths	Rate (per 100k)	Staphylococcus aureus	Methicillin	Attributable	2001	1.96146	2.31605	1.60688
Grenada	Age-standardized	Both sexes	Deaths	Rate (per 100k)	Staphylococcus aureus	Methicillin	Attributable	2001	1.80957	2.89734	0.721791
Greenland	Age-standardized	Both sexes	Deaths	Rate (per 100k)	Staphylococcus aureus	Methicillin	Attributable	2001	1.27445	2.12949	0.41942
Guatemala	Age-standardized	Both sexes	Deaths	Rate (per 100k)	Staphylococcus aureus	Methicillin	Attributable	2001	3.2656	3.75474	2.77646
Guam	Age-standardized	Both sexes	Deaths	Rate (per 100k)	Staphylococcus aureus	Methicillin	Attributable	2001	0.714446	1.16601	0.262877
Guyana	Age-standardized	Both sexes	Deaths	Rate (per 100k)	Staphylococcus aureus	Methicillin	Attributable	2001	1.44545	2.32609	0.564811
Honduras	Age-standardized	Both sexes	Deaths	Rate (per 100k)	Staphylococcus aureus	Methicillin	Attributable	2001	0.676445	0.960793	0.392097
Croatia	Age-standardized	Both sexes	Deaths	Rate (per 100k)	Staphylococcus aureus	Methicillin	Attributable	2001	1.42301	1.72999	1.11603
Haiti	Age-standardized	Both sexes	Deaths	Rate (per 100k)	Staphylococcus aureus	Methicillin	Attributable	2001	1.24022	1.93452	0.545917
Hungary	Age-standardized	Both sexes	Deaths	Rate (per 100k)	Staphylococcus aureus	Methicillin	Attributable	2001	0.916752	1.23501	0.598493
Indonesia	Age-standardized	Both sexes	Deaths	Rate (per 100k)	Staphylococcus aureus	Methicillin	Attributable	2001	0.984909	1.54099	0.428828
India	Age-standardized	Both sexes	Deaths	Rate (per 100k)	Staphylococcus aureus	Methicillin	Attributable	2001	1.76476	2.17212	1.35741
Ireland	Age-standardized	Both sexes	Deaths	Rate (per 100k)	Staphylococcus aureus	Methicillin	Attributable	2001	2.86013	3.35215	2.36811
Iran (Islamic Republic of)	Age-standardized	Both sexes	Deaths	Rate (per 100k)	Staphylococcus aureus	Methicillin	Attributable	2001	1.6525	2.10725	1.19775
Iraq	Age-standardized	Both sexes	Deaths	Rate (per 100k)	Staphylococcus aureus	Methicillin	Attributable	2001	2.12061	2.53108	1.71014
Iceland	Age-standardized	Both sexes	Deaths	Rate (per 100k)	Staphylococcus aureus	Methicillin	Attributable	2001	0.668077	1.20276	0.133397
Israel	Age-standardized	Both sexes	Deaths	Rate (per 100k)	Staphylococcus aureus	Methicillin	Attributable	2001	1.67895	2.43668	0.921218
Italy	Age-standardized	Both sexes	Deaths	Rate (per 100k)	Staphylococcus aureus	Methicillin	Attributable	2001	1.38117	1.7029	1.05944
Jamaica	Age-standardized	Both sexes	Deaths	Rate (per 100k)	Staphylococcus aureus	Methicillin	Attributable	2001	1.25645	2.01185	0.501046
Jordan	Age-standardized	Both sexes	Deaths	Rate (per 100k)	Staphylococcus aureus	Methicillin	Attributable	2001	1.82184	2.64683	0.99685
Japan	Age-standardized	Both sexes	Deaths	Rate (per 100k)	Staphylococcus aureus	Methicillin	Attributable	2001	1.77009	2.23964	1.30053
Kazakhstan	Age-standardized	Both sexes	Deaths	Rate (per 100k)	Staphylococcus aureus	Methicillin	Attributable	2001	1.36484	2.21654	0.513138
Kenya	Age-standardized	Both sexes	Deaths	Rate (per 100k)	Staphylococcus aureus	Methicillin	Attributable	2001	1.24968	1.74836	0.750992
Kyrgyzstan	Age-standardized	Both sexes	Deaths	Rate (per 100k)	Staphylococcus aureus	Methicillin	Attributable	2001	0.968144	1.64129	0.295003
Cambodia	Age-standardized	Both sexes	Deaths	Rate (per 100k)	Staphylococcus aureus	Methicillin	Attributable	2001	0.64656	1.01521	0.277908
Kiribati	Age-standardized	Both sexes	Deaths	Rate (per 100k)	Staphylococcus aureus	Methicillin	Attributable	2001	1.21072	2.04036	0.381069
Saint Kitts and Nevis	Age-standardized	Both sexes	Deaths	Rate (per 100k)	Staphylococcus aureus	Methicillin	Attributable	2001	1.83845	2.9117	0.765214
Republic of Korea	Age-standardized	Both sexes	Deaths	Rate (per 100k)	Staphylococcus aureus	Methicillin	Attributable	2001	1.67327	2.40589	0.940644
Kuwait	Age-standardized	Both sexes	Deaths	Rate (per 100k)	Staphylococcus aureus	Methicillin	Attributable	2001	1.20131	1.53278	0.869836
Lao People's Democratic Republic	Age-standardized	Both sexes	Deaths	Rate (per 100k)	Staphylococcus aureus	Methicillin	Attributable	2001	0.286466	0.429035	0.143897
Lebanon	Age-standardized	Both sexes	Deaths	Rate (per 100k)	Staphylococcus aureus	Methicillin	Attributable	2001	0.493521	0.829035	0.158008
Liberia	Age-standardized	Both sexes	Deaths	Rate (per 100k)	Staphylococcus aureus	Methicillin	Attributable	2001	0.913028	1.62926	0.196796
Libya	Age-standardized	Both sexes	Deaths	Rate (per 100k)	Staphylococcus aureus	Methicillin	Attributable	2001	0.682066	1.04817	0.315959
Saint Lucia	Age-standardized	Both sexes	Deaths	Rate (per 100k)	Staphylococcus aureus	Methicillin	Attributable	2001	1.68354	2.58916	0.777927
Sri Lanka	Age-standardized	Both sexes	Deaths	Rate (per 100k)	Staphylococcus aureus	Methicillin	Attributable	2001	1.2037	1.80874	0.598654
Lesotho	Age-standardized	Both sexes	Deaths	Rate (per 100k)	Staphylococcus aureus	Methicillin	Attributable	2001	0.309721	0.532769	0.0866727
Lithuania	Age-standardized	Both sexes	Deaths	Rate (per 100k)	Staphylococcus aureus	Methicillin	Attributable	2001	0.41952	0.546373	0.292666
Luxembourg	Age-standardized	Both sexes	Deaths	Rate (per 100k)	Staphylococcus aureus	Methicillin	Attributable	2001	1.03522	1.27159	0.798842
Latvia	Age-standardized	Both sexes	Deaths	Rate (per 100k)	Staphylococcus aureus	Methicillin	Attributable	2001	0.952409	1.21881	0.686006
Morocco	Age-standardized	Both sexes	Deaths	Rate (per 100k)	Staphylococcus aureus	Methicillin	Attributable	2001	0.479099	0.671734	0.286464
Monaco	Age-standardized	Both sexes	Deaths	Rate (per 100k)	Staphylococcus aureus	Methicillin	Attributable	2001	0.882544	1.51803	0.247061
Republic of Moldova	Age-standardized	Both sexes	Deaths	Rate (per 100k)	Staphylococcus aureus	Methicillin	Attributable	2001	1.06969	1.72184	0.417539
Madagascar	Age-standardized	Both sexes	Deaths	Rate (per 100k)	Staphylococcus aureus	Methicillin	Attributable	2001	0.418905	0.61108	0.226731
Maldives	Age-standardized	Both sexes	Deaths	Rate (per 100k)	Staphylococcus aureus	Methicillin	Attributable	2001	0.980479	1.65185	0.309105
Mexico	Age-standardized	Both sexes	Deaths	Rate (per 100k)	Staphylococcus aureus	Methicillin	Attributable	2001	1.70349	2.17203	1.23495
Marshall Islands	Age-standardized	Both sexes	Deaths	Rate (per 100k)	Staphylococcus aureus	Methicillin	Attributable	2001	1.45418	2.37077	0.537593
North Macedonia	Age-standardized	Both sexes	Deaths	Rate (per 100k)	Staphylococcus aureus	Methicillin	Attributable	2001	2.22199	3.15698	1.28699
Mali	Age-standardized	Both sexes	Deaths	Rate (per 100k)	Staphylococcus aureus	Methicillin	Attributable	2001	1.97696	2.80881	1.14511
Malta	Age-standardized	Both sexes	Deaths	Rate (per 100k)	Staphylococcus aureus	Methicillin	Attributable	2001	1.95081	2.27801	1.6236
Myanmar	Age-standardized	Both sexes	Deaths	Rate (per 100k)	Staphylococcus aureus	Methicillin	Attributable	2001	2.71948	3.57608	1.86287
Montenegro	Age-standardized	Both sexes	Deaths	Rate (per 100k)	Staphylococcus aureus	Methicillin	Attributable	2001	0.830463	1.34294	0.317982
Mongolia	Age-standardized	Both sexes	Deaths	Rate (per 100k)	Staphylococcus aureus	Methicillin	Attributable	2001	2.07147	2.96279	1.18014
Northern Mariana Islands	Age-standardized	Both sexes	Deaths	Rate (per 100k)	Staphylococcus aureus	Methicillin	Attributable	2001	1.0973	1.77696	0.417646
Mozambique	Age-standardized	Both sexes	Deaths	Rate (per 100k)	Staphylococcus aureus	Methicillin	Attributable	2001	1.04857	1.70243	0.394712
Mauritania	Age-standardized	Both sexes	Deaths	Rate (per 100k)	Staphylococcus aureus	Methicillin	Attributable	2001	0.974536	1.58656	0.362517
Mauritius	Age-standardized	Both sexes	Deaths	Rate (per 100k)	Staphylococcus aureus	Methicillin	Attributable	2001	0.960102	1.63037	0.28983
Malawi	Age-standardized	Both sexes	Deaths	Rate (per 100k)	Staphylococcus aureus	Methicillin	Attributable	2001	1.46744	2.2142	0.72068
Malaysia	Age-standardized	Both sexes	Deaths	Rate (per 100k)	Staphylococcus aureus	Methicillin	Attributable	2001	1.57257	1.85016	1.29497
Namibia	Age-standardized	Both sexes	Deaths	Rate (per 100k)	Staphylococcus aureus	Methicillin	Attributable	2001	1.0867	1.97668	0.196729
Niger	Age-standardized	Both sexes	Deaths	Rate (per 100k)	Staphylococcus aureus	Methicillin	Attributable	2001	1.35097	2.26767	0.434267
Nigeria	Age-standardized	Both sexes	Deaths	Rate (per 100k)	Staphylococcus aureus	Methicillin	Attributable	2001	2.03301	2.62589	1.44014
Nicaragua	Age-standardized	Both sexes	Deaths	Rate (per 100k)	Staphylococcus aureus	Methicillin	Attributable	2001	0.853435	1.19809	0.508777
Niue	Age-standardized	Both sexes	Deaths	Rate (per 100k)	Staphylococcus aureus	Methicillin	Attributable	2001	1.5599	2.57733	0.542471
Netherlands	Age-standardized	Both sexes	Deaths	Rate (per 100k)	Staphylococcus aureus	Methicillin	Attributable	2001	0.111949	0.144613	0.0792854
Norway	Age-standardized	Both sexes	Deaths	Rate (per 100k)	Staphylococcus aureus	Methicillin	Attributable	2001	0.302569	0.515741	0.0893975
Nepal	Age-standardized	Both sexes	Deaths	Rate (per 100k)	Staphylococcus aureus	Methicillin	Attributable	2001	1.33554	2.0087	0.662372
Nauru	Age-standardized	Both sexes	Deaths	Rate (per 100k)	Staphylococcus aureus	Methicillin	Attributable	2001	1.54	2.59845	0.481541
New Zealand	Age-standardized	Both sexes	Deaths	Rate (per 100k)	Staphylococcus aureus	Methicillin	Attributable	2001	0.275542	0.334629	0.216455
Oman	Age-standardized	Both sexes	Deaths	Rate (per 100k)	Staphylococcus aureus	Methicillin	Attributable	2001	0.652573	1.11696	0.188181
Pakistan	Age-standardized	Both sexes	Deaths	Rate (per 100k)	Staphylococcus aureus	Methicillin	Attributable	2001	1.41529	1.77362	1.05696
Panama	Age-standardized	Both sexes	Deaths	Rate (per 100k)	Staphylococcus aureus	Methicillin	Attributable	2001	0.913573	1.19438	0.632768
Peru	Age-standardized	Both sexes	Deaths	Rate (per 100k)	Staphylococcus aureus	Methicillin	Attributable	2001	2.15995	2.68987	1.63004
Philippines	Age-standardized	Both sexes	Deaths	Rate (per 100k)	Staphylococcus aureus	Methicillin	Attributable	2001	2.03439	2.58884	1.47994
Palau	Age-standardized	Both sexes	Deaths	Rate (per 100k)	Staphylococcus aureus	Methicillin	Attributable	2001	1.45579	2.43968	0.471909
Papua New Guinea	Age-standardized	Both sexes	Deaths	Rate (per 100k)	Staphylococcus aureus	Methicillin	Attributable	2001	0.930184	1.59828	0.262085
Poland	Age-standardized	Both sexes	Deaths	Rate (per 100k)	Staphylococcus aureus	Methicillin	Attributable	2001	1.01413	1.24572	0.782527
Puerto Rico	Age-standardized	Both sexes	Deaths	Rate (per 100k)	Staphylococcus aureus	Methicillin	Attributable	2001	1.62313	2.52556	0.720702
Democratic People's Republic of Korea	Age-standardized	Both sexes	Deaths	Rate (per 100k)	Staphylococcus aureus	Methicillin	Attributable	2001	2.16714	3.78395	0.550341
Portugal	Age-standardized	Both sexes	Deaths	Rate (per 100k)	Staphylococcus aureus	Methicillin	Attributable	2001	2.00341	2.41431	1.59252
Paraguay	Age-standardized	Both sexes	Deaths	Rate (per 100k)	Staphylococcus aureus	Methicillin	Attributable	2001	1.03201	1.31761	0.746398
Palestine	Age-standardized	Both sexes	Deaths	Rate (per 100k)	Staphylococcus aureus	Methicillin	Attributable	2001	2.15831	3.14799	1.16863
Qatar	Age-standardized	Both sexes	Deaths	Rate (per 100k)	Staphylococcus aureus	Methicillin	Attributable	2001	2.71448	3.94899	1.47997
Romania	Age-standardized	Both sexes	Deaths	Rate (per 100k)	Staphylococcus aureus	Methicillin	Attributable	2001	2.00333	2.5393	1.46736
Russian Federation	Age-standardized	Both sexes	Deaths	Rate (per 100k)	Staphylococcus aureus	Methicillin	Attributable	2001	1.29151	1.85417	0.728851
Rwanda	Age-standardized	Both sexes	Deaths	Rate (per 100k)	Staphylococcus aureus	Methicillin	Attributable	2001	2.95523	4.17767	1.73279
Saudi Arabia	Age-standardized	Both sexes	Deaths	Rate (per 100k)	Staphylococcus aureus	Methicillin	Attributable	2001	1.09092	1.61783	0.564008
Senegal	Age-standardized	Both sexes	Deaths	Rate (per 100k)	Staphylococcus aureus	Methicillin	Attributable	2001	1.54264	2.18677	0.898524
Singapore	Age-standardized	Both sexes	Deaths	Rate (per 100k)	Staphylococcus aureus	Methicillin	Attributable	2001	0.437585	0.692913	0.182257
Solomon Islands	Age-standardized	Both sexes	Deaths	Rate (per 100k)	Staphylococcus aureus	Methicillin	Attributable	2001	1.042	1.79602	0.287987
Sierra Leone	Age-standardized	Both sexes	Deaths	Rate (per 100k)	Staphylococcus aureus	Methicillin	Attributable	2001	1.48852	2.47416	0.502883
El Salvador	Age-standardized	Both sexes	Deaths	Rate (per 100k)	Staphylococcus aureus	Methicillin	Attributable	2001	1.46545	1.6822	1.2487
San Marino	Age-standardized	Both sexes	Deaths	Rate (per 100k)	Staphylococcus aureus	Methicillin	Attributable	2001	0.815708	1.42048	0.210932
Somalia	Age-standardized	Both sexes	Deaths	Rate (per 100k)	Staphylococcus aureus	Methicillin	Attributable	2001	2.09148	3.21723	0.965734
Serbia	Age-standardized	Both sexes	Deaths	Rate (per 100k)	Staphylococcus aureus	Methicillin	Attributable	2001	1.63749	2.3747	0.900275
South Sudan	Age-standardized	Both sexes	Deaths	Rate (per 100k)	Staphylococcus aureus	Methicillin	Attributable	2001	0.949112	1.6911	0.207125
Sao Tome and Principe	Age-standardized	Both sexes	Deaths	Rate (per 100k)	Staphylococcus aureus	Methicillin	Attributable	2001	1.14064	2.02492	0.256368
Suriname	Age-standardized	Both sexes	Deaths	Rate (per 100k)	Staphylococcus aureus	Methicillin	Attributable	2001	0.928025	1.57351	0.282543
Slovakia	Age-standardized	Both sexes	Deaths	Rate (per 100k)	Staphylococcus aureus	Methicillin	Attributable	2001	0.813101	1.1256	0.500597
Slovenia	Age-standardized	Both sexes	Deaths	Rate (per 100k)	Staphylococcus aureus	Methicillin	Attributable	2001	0.776627	0.948836	0.604419
Sweden	Age-standardized	Both sexes	Deaths	Rate (per 100k)	Staphylococcus aureus	Methicillin	Attributable	2001	0.181651	0.240563	0.12274
Eswatini	Age-standardized	Both sexes	Deaths	Rate (per 100k)	Staphylococcus aureus	Methicillin	Attributable	2001	0.643069	1.08959	0.196544
Seychelles	Age-standardized	Both sexes	Deaths	Rate (per 100k)	Staphylococcus aureus	Methicillin	Attributable	2001	0.918551	1.61021	0.226887
Syrian Arab Republic	Age-standardized	Both sexes	Deaths	Rate (per 100k)	Staphylococcus aureus	Methicillin	Attributable	2001	1.60074	2.34998	0.851489
Chad	Age-standardized	Both sexes	Deaths	Rate (per 100k)	Staphylococcus aureus	Methicillin	Attributable	2001	1.42641	2.35994	0.492886
Togo	Age-standardized	Both sexes	Deaths	Rate (per 100k)	Staphylococcus aureus	Methicillin	Attributable	2001	0.961438	1.62495	0.29793
Thailand	Age-standardized	Both sexes	Deaths	Rate (per 100k)	Staphylococcus aureus	Methicillin	Attributable	2001	1.01435	1.52914	0.499559
Tajikistan	Age-standardized	Both sexes	Deaths	Rate (per 100k)	Staphylococcus aureus	Methicillin	Attributable	2001	1.00774	1.67857	0.336901
Tokelau	Age-standardized	Both sexes	Deaths	Rate (per 100k)	Staphylococcus aureus	Methicillin	Attributable	2001	1.40656	2.29155	0.521571
Turkmenistan	Age-standardized	Both sexes	Deaths	Rate (per 100k)	Staphylococcus aureus	Methicillin	Attributable	2001	0.861318	1.47231	0.250323
Timor-Leste	Age-standardized	Both sexes	Deaths	Rate (per 100k)	Staphylococcus aureus	Methicillin	Attributable	2001	0.674565	1.21707	0.132058
Tonga	Age-standardized	Both sexes	Deaths	Rate (per 100k)	Staphylococcus aureus	Methicillin	Attributable	2001	1.00155	1.7367	0.2664
Trinidad and Tobago	Age-standardized	Both sexes	Deaths	Rate (per 100k)	Staphylococcus aureus	Methicillin	Attributable	2001	1.57458	2.43	0.719151
Tunisia	Age-standardized	Both sexes	Deaths	Rate (per 100k)	Staphylococcus aureus	Methicillin	Attributable	2001	0.977493	1.37833	0.576657
Türkiye	Age-standardized	Both sexes	Deaths	Rate (per 100k)	Staphylococcus aureus	Methicillin	Attributable	2001	1.34146	1.83263	0.850288
Tuvalu	Age-standardized	Both sexes	Deaths	Rate (per 100k)	Staphylococcus aureus	Methicillin	Attributable	2001	1.05075	1.82877	0.272727
Taiwan (Province of China)	Age-standardized	Both sexes	Deaths	Rate (per 100k)	Staphylococcus aureus	Methicillin	Attributable	2001	3.04744	3.60172	2.49315
United Republic of Tanzania	Age-standardized	Both sexes	Deaths	Rate (per 100k)	Staphylococcus aureus	Methicillin	Attributable	2001	0.146639	0.252326	0.0409525
Uganda	Age-standardized	Both sexes	Deaths	Rate (per 100k)	Staphylococcus aureus	Methicillin	Attributable	2001	1.5155	2.16999	0.861011
Ukraine	Age-standardized	Both sexes	Deaths	Rate (per 100k)	Staphylococcus aureus	Methicillin	Attributable	2001	0.887239	1.46989	0.30459
Uruguay	Age-standardized	Both sexes	Deaths	Rate (per 100k)	Staphylococcus aureus	Methicillin	Attributable	2001	2.29993	2.90519	1.69467
United States of America	Age-standardized	Both sexes	Deaths	Rate (per 100k)	Staphylococcus aureus	Methicillin	Attributable	2001	2.23585	2.88377	1.58793
Uzbekistan	Age-standardized	Both sexes	Deaths	Rate (per 100k)	Staphylococcus aureus	Methicillin	Attributable	2001	0.755658	1.28791	0.223404
Saint Vincent and the Grenadines	Age-standardized	Both sexes	Deaths	Rate (per 100k)	Staphylococcus aureus	Methicillin	Attributable	2001	1.45095	2.31309	0.588817
Venezuela (Bolivarian Republic of)	Age-standardized	Both sexes	Deaths	Rate (per 100k)	Staphylococcus aureus	Methicillin	Attributable	2001	0.731268	0.943914	0.518621
United States Virgin Islands	Age-standardized	Both sexes	Deaths	Rate (per 100k)	Staphylococcus aureus	Methicillin	Attributable	2001	1.47984	2.35293	0.606746
Viet Nam	Age-standardized	Both sexes	Deaths	Rate (per 100k)	Staphylococcus aureus	Methicillin	Attributable	2001	1.29462	1.85816	0.731085
Vanuatu	Age-standardized	Both sexes	Deaths	Rate (per 100k)	Staphylococcus aureus	Methicillin	Attributable	2001	0.921862	1.59982	0.2439
Samoa	Age-standardized	Both sexes	Deaths	Rate (per 100k)	Staphylococcus aureus	Methicillin	Attributable	2001	0.918558	1.5866	0.250518
Yemen	Age-standardized	Both sexes	Deaths	Rate (per 100k)	Staphylococcus aureus	Methicillin	Attributable	2001	1.11491	1.78717	0.442646
South Africa	Age-standardized	Both sexes	Deaths	Rate (per 100k)	Staphylococcus aureus	Methicillin	Attributable	2001	1.71874	2.11743	1.32006
Zambia	Age-standardized	Both sexes	Deaths	Rate (per 100k)	Staphylococcus aureus	Methicillin	Attributable	2001	1.50704	2.48798	0.52611
Zimbabwe	Age-standardized	Both sexes	Deaths	Rate (per 100k)	Staphylococcus aureus	Methicillin	Attributable	2001	1.21354	2.11169	0.315387
Egypt	Age-standardized	Both sexes	Deaths	Rate (per 100k)	Staphylococcus aureus	Methicillin	Attributable	2001	2.92636	3.76955	2.08318
Sudan	Age-standardized	Both sexes	Deaths	Rate (per 100k)	Staphylococcus aureus	Methicillin	Attributable	2001	0.842424	1.26578	0.419071
China	Age-standardized	Both sexes	Deaths	Rate (per 100k)	Staphylococcus aureus	Methicillin	Attributable	2001	2.53151	2.93776	2.12527
Afghanistan	Age-standardized	Both sexes	Deaths	Rate (per 100k)	Staphylococcus aureus	Methicillin	Attributable	2002	2.48554	3.49168	1.4794
Angola	Age-standardized	Both sexes	Deaths	Rate (per 100k)	Staphylococcus aureus	Methicillin	Attributable	2002	0.169439	0.288502	0.0503747
Albania	Age-standardized	Both sexes	Deaths	Rate (per 100k)	Staphylococcus aureus	Methicillin	Attributable	2002	0.867111	1.45519	0.279035
Andorra	Age-standardized	Both sexes	Deaths	Rate (per 100k)	Staphylococcus aureus	Methicillin	Attributable	2002	0.739854	1.28411	0.195594
United Arab Emirates	Age-standardized	Both sexes	Deaths	Rate (per 100k)	Staphylococcus aureus	Methicillin	Attributable	2002	1.17622	1.89897	0.453471
Argentina	Age-standardized	Both sexes	Deaths	Rate (per 100k)	Staphylococcus aureus	Methicillin	Attributable	2002	2.4457	2.86434	2.02706
Armenia	Age-standardized	Both sexes	Deaths	Rate (per 100k)	Staphylococcus aureus	Methicillin	Attributable	2002	1.11845	1.83054	0.406362
American Samoa	Age-standardized	Both sexes	Deaths	Rate (per 100k)	Staphylococcus aureus	Methicillin	Attributable	2002	1.32607	2.18025	0.471897
Antigua and Barbuda	Age-standardized	Both sexes	Deaths	Rate (per 100k)	Staphylococcus aureus	Methicillin	Attributable	2002	1.2925	2.12872	0.456275
Australia	Age-standardized	Both sexes	Deaths	Rate (per 100k)	Staphylococcus aureus	Methicillin	Attributable	2002	0.715599	0.880581	0.550618
Austria	Age-standardized	Both sexes	Deaths	Rate (per 100k)	Staphylococcus aureus	Methicillin	Attributable	2002	0.456706	0.5725	0.340912
Azerbaijan	Age-standardized	Both sexes	Deaths	Rate (per 100k)	Staphylococcus aureus	Methicillin	Attributable	2002	0.74957	1.25926	0.23988
Burundi	Age-standardized	Both sexes	Deaths	Rate (per 100k)	Staphylococcus aureus	Methicillin	Attributable	2002	1.09169	1.96232	0.221051
Belgium	Age-standardized	Both sexes	Deaths	Rate (per 100k)	Staphylococcus aureus	Methicillin	Attributable	2002	1.61577	1.93324	1.29831
Benin	Age-standardized	Both sexes	Deaths	Rate (per 100k)	Staphylococcus aureus	Methicillin	Attributable	2002	1.50961	2.21542	0.803803
Burkina Faso	Age-standardized	Both sexes	Deaths	Rate (per 100k)	Staphylococcus aureus	Methicillin	Attributable	2002	0.462366	0.792469	0.132263
Bangladesh	Age-standardized	Both sexes	Deaths	Rate (per 100k)	Staphylococcus aureus	Methicillin	Attributable	2002	1.20952	1.88547	0.533575
Bulgaria	Age-standardized	Both sexes	Deaths	Rate (per 100k)	Staphylococcus aureus	Methicillin	Attributable	2002	1.91546	2.27474	1.55619
Bahrain	Age-standardized	Both sexes	Deaths	Rate (per 100k)	Staphylococcus aureus	Methicillin	Attributable	2002	2.30081	3.53656	1.06505
Bahamas	Age-standardized	Both sexes	Deaths	Rate (per 100k)	Staphylococcus aureus	Methicillin	Attributable	2002	1.50836	2.42784	0.588874
Bosnia and Herzegovina	Age-standardized	Both sexes	Deaths	Rate (per 100k)	Staphylococcus aureus	Methicillin	Attributable	2002	0.655853	1.02333	0.288375
Belarus	Age-standardized	Both sexes	Deaths	Rate (per 100k)	Staphylococcus aureus	Methicillin	Attributable	2002	0.95569	1.4596	0.451777
Belize	Age-standardized	Both sexes	Deaths	Rate (per 100k)	Staphylococcus aureus	Methicillin	Attributable	2002	1.30646	2.10939	0.50352
Bermuda	Age-standardized	Both sexes	Deaths	Rate (per 100k)	Staphylococcus aureus	Methicillin	Attributable	2002	1.27946	2.07802	0.480889
Bolivia (Plurinational State of)	Age-standardized	Both sexes	Deaths	Rate (per 100k)	Staphylococcus aureus	Methicillin	Attributable	2002	1.52277	2.00601	1.03953
Brazil	Age-standardized	Both sexes	Deaths	Rate (per 100k)	Staphylococcus aureus	Methicillin	Attributable	2002	1.39216	1.86995	0.914372
Barbados	Age-standardized	Both sexes	Deaths	Rate (per 100k)	Staphylococcus aureus	Methicillin	Attributable	2002	1.65895	2.63057	0.687331
Brunei Darussalam	Age-standardized	Both sexes	Deaths	Rate (per 100k)	Staphylococcus aureus	Methicillin	Attributable	2002	0.707778	1.18574	0.229818
Bhutan	Age-standardized	Both sexes	Deaths	Rate (per 100k)	Staphylococcus aureus	Methicillin	Attributable	2002	0.612064	1.03954	0.18459
Botswana	Age-standardized	Both sexes	Deaths	Rate (per 100k)	Staphylococcus aureus	Methicillin	Attributable	2002	1.14846	1.8182	0.478728
Central African Republic	Age-standardized	Both sexes	Deaths	Rate (per 100k)	Staphylococcus aureus	Methicillin	Attributable	2002	1.90487	2.88232	0.927432
Canada	Age-standardized	Both sexes	Deaths	Rate (per 100k)	Staphylococcus aureus	Methicillin	Attributable	2002	0.974484	1.43246	0.516511
Switzerland	Age-standardized	Both sexes	Deaths	Rate (per 100k)	Staphylococcus aureus	Methicillin	Attributable	2002	0.302592	0.452	0.153183
Chile	Age-standardized	Both sexes	Deaths	Rate (per 100k)	Staphylococcus aureus	Methicillin	Attributable	2002	2.5654	3.21276	1.91804
Côte d'Ivoire	Age-standardized	Both sexes	Deaths	Rate (per 100k)	Staphylococcus aureus	Methicillin	Attributable	2002	0.890808	1.45022	0.331401
Cameroon	Age-standardized	Both sexes	Deaths	Rate (per 100k)	Staphylococcus aureus	Methicillin	Attributable	2002	1.58168	2.4105	0.752874
Democratic Republic of the Congo	Age-standardized	Both sexes	Deaths	Rate (per 100k)	Staphylococcus aureus	Methicillin	Attributable	2002	1.53873	2.21456	0.862909
Congo	Age-standardized	Both sexes	Deaths	Rate (per 100k)	Staphylococcus aureus	Methicillin	Attributable	2002	2.51773	3.45929	1.57617
Cook Islands	Age-standardized	Both sexes	Deaths	Rate (per 100k)	Staphylococcus aureus	Methicillin	Attributable	2002	1.40639	2.28673	0.526053
Colombia	Age-standardized	Both sexes	Deaths	Rate (per 100k)	Staphylococcus aureus	Methicillin	Attributable	2002	1.35539	1.66657	1.04421
Comoros	Age-standardized	Both sexes	Deaths	Rate (per 100k)	Staphylococcus aureus	Methicillin	Attributable	2002	1.21572	2.08544	0.346002
Cabo Verde	Age-standardized	Both sexes	Deaths	Rate (per 100k)	Staphylococcus aureus	Methicillin	Attributable	2002	0.751243	1.30518	0.197311
Costa Rica	Age-standardized	Both sexes	Deaths	Rate (per 100k)	Staphylococcus aureus	Methicillin	Attributable	2002	1.67725	2.07665	1.27785
Cuba	Age-standardized	Both sexes	Deaths	Rate (per 100k)	Staphylococcus aureus	Methicillin	Attributable	2002	1.37494	1.86198	0.887896
Cyprus	Age-standardized	Both sexes	Deaths	Rate (per 100k)	Staphylococcus aureus	Methicillin	Attributable	2002	2.76985	3.30563	2.23408
Czechia	Age-standardized	Both sexes	Deaths	Rate (per 100k)	Staphylococcus aureus	Methicillin	Attributable	2002	0.510346	0.642541	0.378152
Germany	Age-standardized	Both sexes	Deaths	Rate (per 100k)	Staphylococcus aureus	Methicillin	Attributable	2002	0.716309	0.860377	0.57224
Djibouti	Age-standardized	Both sexes	Deaths	Rate (per 100k)	Staphylococcus aureus	Methicillin	Attributable	2002	0.773567	1.40541	0.141728
Dominica	Age-standardized	Both sexes	Deaths	Rate (per 100k)	Staphylococcus aureus	Methicillin	Attributable	2002	1.69832	2.64307	0.753579
Denmark	Age-standardized	Both sexes	Deaths	Rate (per 100k)	Staphylococcus aureus	Methicillin	Attributable	2002	0.127645	0.160245	0.0950454
Dominican Republic	Age-standardized	Both sexes	Deaths	Rate (per 100k)	Staphylococcus aureus	Methicillin	Attributable	2002	0.969852	1.248	0.691703
Algeria	Age-standardized	Both sexes	Deaths	Rate (per 100k)	Staphylococcus aureus	Methicillin	Attributable	2002	1.5959	2.18779	1.00401
Ecuador	Age-standardized	Both sexes	Deaths	Rate (per 100k)	Staphylococcus aureus	Methicillin	Attributable	2002	1.31824	1.64447	0.992013
Eritrea	Age-standardized	Both sexes	Deaths	Rate (per 100k)	Staphylococcus aureus	Methicillin	Attributable	2002	0.86695	1.50903	0.224876
Spain	Age-standardized	Both sexes	Deaths	Rate (per 100k)	Staphylococcus aureus	Methicillin	Attributable	2002	1.21709	1.54416	0.890024
Estonia	Age-standardized	Both sexes	Deaths	Rate (per 100k)	Staphylococcus aureus	Methicillin	Attributable	2002	0.297811	0.393549	0.202073
Ethiopia	Age-standardized	Both sexes	Deaths	Rate (per 100k)	Staphylococcus aureus	Methicillin	Attributable	2002	1.42109	2.11577	0.726412
Finland	Age-standardized	Both sexes	Deaths	Rate (per 100k)	Staphylococcus aureus	Methicillin	Attributable	2002	0.150756	0.190829	0.110683
Fiji	Age-standardized	Both sexes	Deaths	Rate (per 100k)	Staphylococcus aureus	Methicillin	Attributable	2002	1.12693	1.83973	0.414133
France	Age-standardized	Both sexes	Deaths	Rate (per 100k)	Staphylococcus aureus	Methicillin	Attributable	2002	1.37553	1.67465	1.0764
Micronesia (Federated States of)	Age-standardized	Both sexes	Deaths	Rate (per 100k)	Staphylococcus aureus	Methicillin	Attributable	2002	1.06508	1.82285	0.307312
Gabon	Age-standardized	Both sexes	Deaths	Rate (per 100k)	Staphylococcus aureus	Methicillin	Attributable	2002	1.21582	1.95302	0.478616
United Kingdom	Age-standardized	Both sexes	Deaths	Rate (per 100k)	Staphylococcus aureus	Methicillin	Attributable	2002	2.38086	2.77773	1.984
Georgia	Age-standardized	Both sexes	Deaths	Rate (per 100k)	Staphylococcus aureus	Methicillin	Attributable	2002	1.06933	1.54092	0.597731
Ghana	Age-standardized	Both sexes	Deaths	Rate (per 100k)	Staphylococcus aureus	Methicillin	Attributable	2002	1.51764	2.26651	0.76877
Guinea	Age-standardized	Both sexes	Deaths	Rate (per 100k)	Staphylococcus aureus	Methicillin	Attributable	2002	1.53298	2.57079	0.495167
Gambia	Age-standardized	Both sexes	Deaths	Rate (per 100k)	Staphylococcus aureus	Methicillin	Attributable	2002	1.41307	2.48001	0.346123
Guinea-Bissau	Age-standardized	Both sexes	Deaths	Rate (per 100k)	Staphylococcus aureus	Methicillin	Attributable	2002	1.30554	2.31869	0.292385
Equatorial Guinea	Age-standardized	Both sexes	Deaths	Rate (per 100k)	Staphylococcus aureus	Methicillin	Attributable	2002	1.54582	2.42998	0.661654
Greece	Age-standardized	Both sexes	Deaths	Rate (per 100k)	Staphylococcus aureus	Methicillin	Attributable	2002	1.95532	2.313	1.59765
Grenada	Age-standardized	Both sexes	Deaths	Rate (per 100k)	Staphylococcus aureus	Methicillin	Attributable	2002	1.88541	3.03624	0.734578
Greenland	Age-standardized	Both sexes	Deaths	Rate (per 100k)	Staphylococcus aureus	Methicillin	Attributable	2002	1.35027	2.24138	0.459168
Guatemala	Age-standardized	Both sexes	Deaths	Rate (per 100k)	Staphylococcus aureus	Methicillin	Attributable	2002	3.14544	3.59637	2.69451
Guam	Age-standardized	Both sexes	Deaths	Rate (per 100k)	Staphylococcus aureus	Methicillin	Attributable	2002	0.728556	1.18842	0.268694
Guyana	Age-standardized	Both sexes	Deaths	Rate (per 100k)	Staphylococcus aureus	Methicillin	Attributable	2002	1.53172	2.45704	0.606393
Honduras	Age-standardized	Both sexes	Deaths	Rate (per 100k)	Staphylococcus aureus	Methicillin	Attributable	2002	0.779925	1.09163	0.468222
Croatia	Age-standardized	Both sexes	Deaths	Rate (per 100k)	Staphylococcus aureus	Methicillin	Attributable	2002	1.50261	1.81291	1.19231
Haiti	Age-standardized	Both sexes	Deaths	Rate (per 100k)	Staphylococcus aureus	Methicillin	Attributable	2002	1.2863	1.9853	0.587301
Hungary	Age-standardized	Both sexes	Deaths	Rate (per 100k)	Staphylococcus aureus	Methicillin	Attributable	2002	0.922638	1.23164	0.613633
Indonesia	Age-standardized	Both sexes	Deaths	Rate (per 100k)	Staphylococcus aureus	Methicillin	Attributable	2002	1.21337	1.82094	0.605791
India	Age-standardized	Both sexes	Deaths	Rate (per 100k)	Staphylococcus aureus	Methicillin	Attributable	2002	1.76312	2.14488	1.38137
Ireland	Age-standardized	Both sexes	Deaths	Rate (per 100k)	Staphylococcus aureus	Methicillin	Attributable	2002	2.82932	3.29738	2.36126
Iran (Islamic Republic of)	Age-standardized	Both sexes	Deaths	Rate (per 100k)	Staphylococcus aureus	Methicillin	Attributable	2002	1.65407	2.11962	1.18852
Iraq	Age-standardized	Both sexes	Deaths	Rate (per 100k)	Staphylococcus aureus	Methicillin	Attributable	2002	2.143	2.55443	1.73158
Iceland	Age-standardized	Both sexes	Deaths	Rate (per 100k)	Staphylococcus aureus	Methicillin	Attributable	2002	0.654733	1.17494	0.134525
Israel	Age-standardized	Both sexes	Deaths	Rate (per 100k)	Staphylococcus aureus	Methicillin	Attributable	2002	1.80939	2.58642	1.03235
Italy	Age-standardized	Both sexes	Deaths	Rate (per 100k)	Staphylococcus aureus	Methicillin	Attributable	2002	1.3745	1.68526	1.06374
Jamaica	Age-standardized	Both sexes	Deaths	Rate (per 100k)	Staphylococcus aureus	Methicillin	Attributable	2002	1.1898	1.903	0.476601
Jordan	Age-standardized	Both sexes	Deaths	Rate (per 100k)	Staphylococcus aureus	Methicillin	Attributable	2002	1.90032	2.71892	1.08172
Japan	Age-standardized	Both sexes	Deaths	Rate (per 100k)	Staphylococcus aureus	Methicillin	Attributable	2002	1.69147	2.1196	1.26335
Kazakhstan	Age-standardized	Both sexes	Deaths	Rate (per 100k)	Staphylococcus aureus	Methicillin	Attributable	2002	1.38923	2.26511	0.513358
Kenya	Age-standardized	Both sexes	Deaths	Rate (per 100k)	Staphylococcus aureus	Methicillin	Attributable	2002	1.44637	1.97062	0.922117
Kyrgyzstan	Age-standardized	Both sexes	Deaths	Rate (per 100k)	Staphylococcus aureus	Methicillin	Attributable	2002	1.01331	1.71753	0.309097
Cambodia	Age-standardized	Both sexes	Deaths	Rate (per 100k)	Staphylococcus aureus	Methicillin	Attributable	2002	0.702737	1.09783	0.307647
Kiribati	Age-standardized	Both sexes	Deaths	Rate (per 100k)	Staphylococcus aureus	Methicillin	Attributable	2002	1.21922	2.05172	0.386721
Saint Kitts and Nevis	Age-standardized	Both sexes	Deaths	Rate (per 100k)	Staphylococcus aureus	Methicillin	Attributable	2002	1.87239	2.95309	0.791689
Republic of Korea	Age-standardized	Both sexes	Deaths	Rate (per 100k)	Staphylococcus aureus	Methicillin	Attributable	2002	1.66169	2.36643	0.956939
Kuwait	Age-standardized	Both sexes	Deaths	Rate (per 100k)	Staphylococcus aureus	Methicillin	Attributable	2002	1.42964	1.79467	1.0646
Lao People's Democratic Republic	Age-standardized	Both sexes	Deaths	Rate (per 100k)	Staphylococcus aureus	Methicillin	Attributable	2002	0.295282	0.437952	0.152611
Lebanon	Age-standardized	Both sexes	Deaths	Rate (per 100k)	Staphylococcus aureus	Methicillin	Attributable	2002	0.505705	0.846543	0.164868
Liberia	Age-standardized	Both sexes	Deaths	Rate (per 100k)	Staphylococcus aureus	Methicillin	Attributable	2002	1.06929	1.86758	0.270999
Libya	Age-standardized	Both sexes	Deaths	Rate (per 100k)	Staphylococcus aureus	Methicillin	Attributable	2002	0.754925	1.14587	0.363982
Saint Lucia	Age-standardized	Both sexes	Deaths	Rate (per 100k)	Staphylococcus aureus	Methicillin	Attributable	2002	1.71236	2.62935	0.795371
Sri Lanka	Age-standardized	Both sexes	Deaths	Rate (per 100k)	Staphylococcus aureus	Methicillin	Attributable	2002	1.16801	1.74939	0.586632
Lesotho	Age-standardized	Both sexes	Deaths	Rate (per 100k)	Staphylococcus aureus	Methicillin	Attributable	2002	0.330246	0.566894	0.0935985
Lithuania	Age-standardized	Both sexes	Deaths	Rate (per 100k)	Staphylococcus aureus	Methicillin	Attributable	2002	0.417183	0.537381	0.296984
Luxembourg	Age-standardized	Both sexes	Deaths	Rate (per 100k)	Staphylococcus aureus	Methicillin	Attributable	2002	1.08609	1.31706	0.855114
Latvia	Age-standardized	Both sexes	Deaths	Rate (per 100k)	Staphylococcus aureus	Methicillin	Attributable	2002	0.92132	1.16894	0.673702
Morocco	Age-standardized	Both sexes	Deaths	Rate (per 100k)	Staphylococcus aureus	Methicillin	Attributable	2002	0.485023	0.671711	0.298335
Monaco	Age-standardized	Both sexes	Deaths	Rate (per 100k)	Staphylococcus aureus	Methicillin	Attributable	2002	0.911273	1.55888	0.263671
Republic of Moldova	Age-standardized	Both sexes	Deaths	Rate (per 100k)	Staphylococcus aureus	Methicillin	Attributable	2002	1.00215	1.62986	0.374442
Madagascar	Age-standardized	Both sexes	Deaths	Rate (per 100k)	Staphylococcus aureus	Methicillin	Attributable	2002	0.440113	0.635961	0.244266
Maldives	Age-standardized	Both sexes	Deaths	Rate (per 100k)	Staphylococcus aureus	Methicillin	Attributable	2002	0.927148	1.57179	0.282506
Mexico	Age-standardized	Both sexes	Deaths	Rate (per 100k)	Staphylococcus aureus	Methicillin	Attributable	2002	1.77725	2.22783	1.32666
Marshall Islands	Age-standardized	Both sexes	Deaths	Rate (per 100k)	Staphylococcus aureus	Methicillin	Attributable	2002	1.44481	2.36301	0.526602
North Macedonia	Age-standardized	Both sexes	Deaths	Rate (per 100k)	Staphylococcus aureus	Methicillin	Attributable	2002	2.42506	3.3791	1.47103
Mali	Age-standardized	Both sexes	Deaths	Rate (per 100k)	Staphylococcus aureus	Methicillin	Attributable	2002	2.16711	3.00762	1.3266
Malta	Age-standardized	Both sexes	Deaths	Rate (per 100k)	Staphylococcus aureus	Methicillin	Attributable	2002	1.98829	2.30976	1.66681
Myanmar	Age-standardized	Both sexes	Deaths	Rate (per 100k)	Staphylococcus aureus	Methicillin	Attributable	2002	2.68819	3.53593	1.84044
Montenegro	Age-standardized	Both sexes	Deaths	Rate (per 100k)	Staphylococcus aureus	Methicillin	Attributable	2002	0.91733	1.44923	0.385433
Mongolia	Age-standardized	Both sexes	Deaths	Rate (per 100k)	Staphylococcus aureus	Methicillin	Attributable	2002	2.0276	2.90792	1.14728
Northern Mariana Islands	Age-standardized	Both sexes	Deaths	Rate (per 100k)	Staphylococcus aureus	Methicillin	Attributable	2002	1.1678	1.87295	0.462639
Mozambique	Age-standardized	Both sexes	Deaths	Rate (per 100k)	Staphylococcus aureus	Methicillin	Attributable	2002	1.06737	1.71736	0.417377
Mauritania	Age-standardized	Both sexes	Deaths	Rate (per 100k)	Staphylococcus aureus	Methicillin	Attributable	2002	0.969319	1.57532	0.363315
Mauritius	Age-standardized	Both sexes	Deaths	Rate (per 100k)	Staphylococcus aureus	Methicillin	Attributable	2002	0.933755	1.58732	0.280191
Malawi	Age-standardized	Both sexes	Deaths	Rate (per 100k)	Staphylococcus aureus	Methicillin	Attributable	2002	1.48059	2.19591	0.765258
Malaysia	Age-standardized	Both sexes	Deaths	Rate (per 100k)	Staphylococcus aureus	Methicillin	Attributable	2002	1.53201	1.79805	1.26596
Namibia	Age-standardized	Both sexes	Deaths	Rate (per 100k)	Staphylococcus aureus	Methicillin	Attributable	2002	1.10554	2.00382	0.207266
Niger	Age-standardized	Both sexes	Deaths	Rate (per 100k)	Staphylococcus aureus	Methicillin	Attributable	2002	1.29995	2.19793	0.401979
Nigeria	Age-standardized	Both sexes	Deaths	Rate (per 100k)	Staphylococcus aureus	Methicillin	Attributable	2002	1.99153	2.5212	1.46186
Nicaragua	Age-standardized	Both sexes	Deaths	Rate (per 100k)	Staphylococcus aureus	Methicillin	Attributable	2002	0.988294	1.34894	0.62765
Niue	Age-standardized	Both sexes	Deaths	Rate (per 100k)	Staphylococcus aureus	Methicillin	Attributable	2002	1.55784	2.58031	0.535366
Netherlands	Age-standardized	Both sexes	Deaths	Rate (per 100k)	Staphylococcus aureus	Methicillin	Attributable	2002	0.117925	0.147875	0.0879749
Norway	Age-standardized	Both sexes	Deaths	Rate (per 100k)	Staphylococcus aureus	Methicillin	Attributable	2002	0.310944	0.521781	0.100107
Nepal	Age-standardized	Both sexes	Deaths	Rate (per 100k)	Staphylococcus aureus	Methicillin	Attributable	2002	1.33883	2.00398	0.67369
Nauru	Age-standardized	Both sexes	Deaths	Rate (per 100k)	Staphylococcus aureus	Methicillin	Attributable	2002	1.60741	2.69632	0.518496
New Zealand	Age-standardized	Both sexes	Deaths	Rate (per 100k)	Staphylococcus aureus	Methicillin	Attributable	2002	0.290174	0.35045	0.229899
Oman	Age-standardized	Both sexes	Deaths	Rate (per 100k)	Staphylococcus aureus	Methicillin	Attributable	2002	0.695035	1.18197	0.208101
Pakistan	Age-standardized	Both sexes	Deaths	Rate (per 100k)	Staphylococcus aureus	Methicillin	Attributable	2002	1.37007	1.7019	1.03824
Panama	Age-standardized	Both sexes	Deaths	Rate (per 100k)	Staphylococcus aureus	Methicillin	Attributable	2002	0.958727	1.23036	0.687089
Peru	Age-standardized	Both sexes	Deaths	Rate (per 100k)	Staphylococcus aureus	Methicillin	Attributable	2002	2.31642	2.82067	1.81218
Philippines	Age-standardized	Both sexes	Deaths	Rate (per 100k)	Staphylococcus aureus	Methicillin	Attributable	2002	2.26253	2.79935	1.72571
Palau	Age-standardized	Both sexes	Deaths	Rate (per 100k)	Staphylococcus aureus	Methicillin	Attributable	2002	1.48793	2.49131	0.484544
Papua New Guinea	Age-standardized	Both sexes	Deaths	Rate (per 100k)	Staphylococcus aureus	Methicillin	Attributable	2002	0.948878	1.62905	0.268708
Poland	Age-standardized	Both sexes	Deaths	Rate (per 100k)	Staphylococcus aureus	Methicillin	Attributable	2002	0.968119	1.18279	0.753453
Puerto Rico	Age-standardized	Both sexes	Deaths	Rate (per 100k)	Staphylococcus aureus	Methicillin	Attributable	2002	1.55583	2.41595	0.695719
Democratic People's Republic of Korea	Age-standardized	Both sexes	Deaths	Rate (per 100k)	Staphylococcus aureus	Methicillin	Attributable	2002	2.20903	3.95042	0.467637
Portugal	Age-standardized	Both sexes	Deaths	Rate (per 100k)	Staphylococcus aureus	Methicillin	Attributable	2002	2.03788	2.43414	1.64161
Paraguay	Age-standardized	Both sexes	Deaths	Rate (per 100k)	Staphylococcus aureus	Methicillin	Attributable	2002	1.04084	1.30729	0.774398
Palestine	Age-standardized	Both sexes	Deaths	Rate (per 100k)	Staphylococcus aureus	Methicillin	Attributable	2002	2.21566	3.25374	1.17758
Qatar	Age-standardized	Both sexes	Deaths	Rate (per 100k)	Staphylococcus aureus	Methicillin	Attributable	2002	2.96482	4.23903	1.69061
Romania	Age-standardized	Both sexes	Deaths	Rate (per 100k)	Staphylococcus aureus	Methicillin	Attributable	2002	2.1727	2.71135	1.63405
Russian Federation	Age-standardized	Both sexes	Deaths	Rate (per 100k)	Staphylococcus aureus	Methicillin	Attributable	2002	1.37188	1.97296	0.770795
Rwanda	Age-standardized	Both sexes	Deaths	Rate (per 100k)	Staphylococcus aureus	Methicillin	Attributable	2002	2.8854	4.06014	1.71065
Saudi Arabia	Age-standardized	Both sexes	Deaths	Rate (per 100k)	Staphylococcus aureus	Methicillin	Attributable	2002	1.1436	1.66755	0.61966
Senegal	Age-standardized	Both sexes	Deaths	Rate (per 100k)	Staphylococcus aureus	Methicillin	Attributable	2002	1.46526	2.10945	0.821074
Singapore	Age-standardized	Both sexes	Deaths	Rate (per 100k)	Staphylococcus aureus	Methicillin	Attributable	2002	0.479014	0.750694	0.207334
Solomon Islands	Age-standardized	Both sexes	Deaths	Rate (per 100k)	Staphylococcus aureus	Methicillin	Attributable	2002	1.05969	1.82286	0.296523
Sierra Leone	Age-standardized	Both sexes	Deaths	Rate (per 100k)	Staphylococcus aureus	Methicillin	Attributable	2002	1.47043	2.46105	0.479815
El Salvador	Age-standardized	Both sexes	Deaths	Rate (per 100k)	Staphylococcus aureus	Methicillin	Attributable	2002	1.47344	1.67346	1.27342
San Marino	Age-standardized	Both sexes	Deaths	Rate (per 100k)	Staphylococcus aureus	Methicillin	Attributable	2002	0.815942	1.41253	0.219357
Somalia	Age-standardized	Both sexes	Deaths	Rate (per 100k)	Staphylococcus aureus	Methicillin	Attributable	2002	2.13738	3.25638	1.01839
Serbia	Age-standardized	Both sexes	Deaths	Rate (per 100k)	Staphylococcus aureus	Methicillin	Attributable	2002	1.58422	2.29076	0.877692
South Sudan	Age-standardized	Both sexes	Deaths	Rate (per 100k)	Staphylococcus aureus	Methicillin	Attributable	2002	0.934648	1.66512	0.204179
Sao Tome and Principe	Age-standardized	Both sexes	Deaths	Rate (per 100k)	Staphylococcus aureus	Methicillin	Attributable	2002	1.17871	2.07483	0.282585
Suriname	Age-standardized	Both sexes	Deaths	Rate (per 100k)	Staphylococcus aureus	Methicillin	Attributable	2002	0.902465	1.5429	0.262028
Slovakia	Age-standardized	Both sexes	Deaths	Rate (per 100k)	Staphylococcus aureus	Methicillin	Attributable	2002	0.845161	1.16278	0.527545
Slovenia	Age-standardized	Both sexes	Deaths	Rate (per 100k)	Staphylococcus aureus	Methicillin	Attributable	2002	0.718998	0.867563	0.570434
Sweden	Age-standardized	Both sexes	Deaths	Rate (per 100k)	Staphylococcus aureus	Methicillin	Attributable	2002	0.198405	0.260439	0.13637
Eswatini	Age-standardized	Both sexes	Deaths	Rate (per 100k)	Staphylococcus aureus	Methicillin	Attributable	2002	0.704859	1.19486	0.214856
Seychelles	Age-standardized	Both sexes	Deaths	Rate (per 100k)	Staphylococcus aureus	Methicillin	Attributable	2002	0.975264	1.70486	0.245665
Syrian Arab Republic	Age-standardized	Both sexes	Deaths	Rate (per 100k)	Staphylococcus aureus	Methicillin	Attributable	2002	1.60332	2.36131	0.84533
Chad	Age-standardized	Both sexes	Deaths	Rate (per 100k)	Staphylococcus aureus	Methicillin	Attributable	2002	1.36576	2.28604	0.445485
Togo	Age-standardized	Both sexes	Deaths	Rate (per 100k)	Staphylococcus aureus	Methicillin	Attributable	2002	1.01693	1.67861	0.355255
Thailand	Age-standardized	Both sexes	Deaths	Rate (per 100k)	Staphylococcus aureus	Methicillin	Attributable	2002	1.01438	1.51781	0.510953
Tajikistan	Age-standardized	Both sexes	Deaths	Rate (per 100k)	Staphylococcus aureus	Methicillin	Attributable	2002	1.01022	1.69487	0.325559
Tokelau	Age-standardized	Both sexes	Deaths	Rate (per 100k)	Staphylococcus aureus	Methicillin	Attributable	2002	1.35021	2.21545	0.48496
Turkmenistan	Age-standardized	Both sexes	Deaths	Rate (per 100k)	Staphylococcus aureus	Methicillin	Attributable	2002	0.938365	1.59831	0.278419
Timor-Leste	Age-standardized	Both sexes	Deaths	Rate (per 100k)	Staphylococcus aureus	Methicillin	Attributable	2002	0.640772	1.16514	0.116405
Tonga	Age-standardized	Both sexes	Deaths	Rate (per 100k)	Staphylococcus aureus	Methicillin	Attributable	2002	0.992845	1.71813	0.267556
Trinidad and Tobago	Age-standardized	Both sexes	Deaths	Rate (per 100k)	Staphylococcus aureus	Methicillin	Attributable	2002	1.60802	2.4533	0.76273
Tunisia	Age-standardized	Both sexes	Deaths	Rate (per 100k)	Staphylococcus aureus	Methicillin	Attributable	2002	1.01227	1.42785	0.596682
Türkiye	Age-standardized	Both sexes	Deaths	Rate (per 100k)	Staphylococcus aureus	Methicillin	Attributable	2002	1.38985	1.86754	0.912165
Tuvalu	Age-standardized	Both sexes	Deaths	Rate (per 100k)	Staphylococcus aureus	Methicillin	Attributable	2002	1.00417	1.75405	0.254289
Taiwan (Province of China)	Age-standardized	Both sexes	Deaths	Rate (per 100k)	Staphylococcus aureus	Methicillin	Attributable	2002	3.09247	3.6272	2.55775
United Republic of Tanzania	Age-standardized	Both sexes	Deaths	Rate (per 100k)	Staphylococcus aureus	Methicillin	Attributable	2002	0.146203	0.252377	0.0400279
Uganda	Age-standardized	Both sexes	Deaths	Rate (per 100k)	Staphylococcus aureus	Methicillin	Attributable	2002	1.63397	2.29332	0.974622
Ukraine	Age-standardized	Both sexes	Deaths	Rate (per 100k)	Staphylococcus aureus	Methicillin	Attributable	2002	0.940746	1.55334	0.328148
Uruguay	Age-standardized	Both sexes	Deaths	Rate (per 100k)	Staphylococcus aureus	Methicillin	Attributable	2002	2.35765	2.95977	1.75554
United States of America	Age-standardized	Both sexes	Deaths	Rate (per 100k)	Staphylococcus aureus	Methicillin	Attributable	2002	2.30303	2.93833	1.66773
Uzbekistan	Age-standardized	Both sexes	Deaths	Rate (per 100k)	Staphylococcus aureus	Methicillin	Attributable	2002	0.796095	1.36062	0.231568
Saint Vincent and the Grenadines	Age-standardized	Both sexes	Deaths	Rate (per 100k)	Staphylococcus aureus	Methicillin	Attributable	2002	1.48689	2.35019	0.623589
Venezuela (Bolivarian Republic of)	Age-standardized	Both sexes	Deaths	Rate (per 100k)	Staphylococcus aureus	Methicillin	Attributable	2002	0.77057	0.979264	0.561877
United States Virgin Islands	Age-standardized	Both sexes	Deaths	Rate (per 100k)	Staphylococcus aureus	Methicillin	Attributable	2002	1.50796	2.38542	0.630499
Viet Nam	Age-standardized	Both sexes	Deaths	Rate (per 100k)	Staphylococcus aureus	Methicillin	Attributable	2002	1.35269	1.91366	0.791722
Vanuatu	Age-standardized	Both sexes	Deaths	Rate (per 100k)	Staphylococcus aureus	Methicillin	Attributable	2002	0.900886	1.56051	0.241266
Samoa	Age-standardized	Both sexes	Deaths	Rate (per 100k)	Staphylococcus aureus	Methicillin	Attributable	2002	0.904379	1.55328	0.255483
Yemen	Age-standardized	Both sexes	Deaths	Rate (per 100k)	Staphylococcus aureus	Methicillin	Attributable	2002	1.10724	1.79242	0.422064
South Africa	Age-standardized	Both sexes	Deaths	Rate (per 100k)	Staphylococcus aureus	Methicillin	Attributable	2002	1.80717	2.22371	1.39063
Zambia	Age-standardized	Both sexes	Deaths	Rate (per 100k)	Staphylococcus aureus	Methicillin	Attributable	2002	1.52285	2.48582	0.559889
Zimbabwe	Age-standardized	Both sexes	Deaths	Rate (per 100k)	Staphylococcus aureus	Methicillin	Attributable	2002	1.25798	2.18375	0.332204
Egypt	Age-standardized	Both sexes	Deaths	Rate (per 100k)	Staphylococcus aureus	Methicillin	Attributable	2002	2.92342	3.77885	2.06798
Sudan	Age-standardized	Both sexes	Deaths	Rate (per 100k)	Staphylococcus aureus	Methicillin	Attributable	2002	0.871135	1.29737	0.444896
China	Age-standardized	Both sexes	Deaths	Rate (per 100k)	Staphylococcus aureus	Methicillin	Attributable	2002	2.52343	2.90454	2.14232
Afghanistan	Age-standardized	Both sexes	Deaths	Rate (per 100k)	Staphylococcus aureus	Methicillin	Attributable	2003	2.53844	3.48974	1.58714
Angola	Age-standardized	Both sexes	Deaths	Rate (per 100k)	Staphylococcus aureus	Methicillin	Attributable	2003	0.157995	0.269186	0.0468041
Albania	Age-standardized	Both sexes	Deaths	Rate (per 100k)	Staphylococcus aureus	Methicillin	Attributable	2003	0.906666	1.50593	0.307403
Andorra	Age-standardized	Both sexes	Deaths	Rate (per 100k)	Staphylococcus aureus	Methicillin	Attributable	2003	0.772964	1.34148	0.204448
United Arab Emirates	Age-standardized	Both sexes	Deaths	Rate (per 100k)	Staphylococcus aureus	Methicillin	Attributable	2003	1.12149	1.81127	0.431707
Argentina	Age-standardized	Both sexes	Deaths	Rate (per 100k)	Staphylococcus aureus	Methicillin	Attributable	2003	2.5722	3.00257	2.14184
Armenia	Age-standardized	Both sexes	Deaths	Rate (per 100k)	Staphylococcus aureus	Methicillin	Attributable	2003	1.18261	1.92539	0.439824
American Samoa	Age-standardized	Both sexes	Deaths	Rate (per 100k)	Staphylococcus aureus	Methicillin	Attributable	2003	1.39161	2.28385	0.499363
Antigua and Barbuda	Age-standardized	Both sexes	Deaths	Rate (per 100k)	Staphylococcus aureus	Methicillin	Attributable	2003	1.30683	2.15623	0.457431
Australia	Age-standardized	Both sexes	Deaths	Rate (per 100k)	Staphylococcus aureus	Methicillin	Attributable	2003	0.795591	0.966881	0.624301
Austria	Age-standardized	Both sexes	Deaths	Rate (per 100k)	Staphylococcus aureus	Methicillin	Attributable	2003	0.521609	0.646502	0.396717
Azerbaijan	Age-standardized	Both sexes	Deaths	Rate (per 100k)	Staphylococcus aureus	Methicillin	Attributable	2003	0.796664	1.34082	0.252509
Burundi	Age-standardized	Both sexes	Deaths	Rate (per 100k)	Staphylococcus aureus	Methicillin	Attributable	2003	1.07194	1.92483	0.219038
Belgium	Age-standardized	Both sexes	Deaths	Rate (per 100k)	Staphylococcus aureus	Methicillin	Attributable	2003	1.65832	1.98075	1.3359
Benin	Age-standardized	Both sexes	Deaths	Rate (per 100k)	Staphylococcus aureus	Methicillin	Attributable	2003	1.48168	2.15968	0.803685
Burkina Faso	Age-standardized	Both sexes	Deaths	Rate (per 100k)	Staphylococcus aureus	Methicillin	Attributable	2003	0.450218	0.771027	0.129409
Bangladesh	Age-standardized	Both sexes	Deaths	Rate (per 100k)	Staphylococcus aureus	Methicillin	Attributable	2003	1.25088	1.94805	0.553719
Bulgaria	Age-standardized	Both sexes	Deaths	Rate (per 100k)	Staphylococcus aureus	Methicillin	Attributable	2003	1.88137	2.20417	1.55857
Bahrain	Age-standardized	Both sexes	Deaths	Rate (per 100k)	Staphylococcus aureus	Methicillin	Attributable	2003	2.56115	3.87761	1.2447
Bahamas	Age-standardized	Both sexes	Deaths	Rate (per 100k)	Staphylococcus aureus	Methicillin	Attributable	2003	1.56029	2.51169	0.608882
Bosnia and Herzegovina	Age-standardized	Both sexes	Deaths	Rate (per 100k)	Staphylococcus aureus	Methicillin	Attributable	2003	0.697167	1.08161	0.312724
Belarus	Age-standardized	Both sexes	Deaths	Rate (per 100k)	Staphylococcus aureus	Methicillin	Attributable	2003	1.03105	1.54485	0.517244
Belize	Age-standardized	Both sexes	Deaths	Rate (per 100k)	Staphylococcus aureus	Methicillin	Attributable	2003	1.36383	2.19332	0.534353
Bermuda	Age-standardized	Both sexes	Deaths	Rate (per 100k)	Staphylococcus aureus	Methicillin	Attributable	2003	1.26886	2.07089	0.466827
Bolivia (Plurinational State of)	Age-standardized	Both sexes	Deaths	Rate (per 100k)	Staphylococcus aureus	Methicillin	Attributable	2003	1.65881	2.14383	1.17379
Brazil	Age-standardized	Both sexes	Deaths	Rate (per 100k)	Staphylococcus aureus	Methicillin	Attributable	2003	1.45288	1.92942	0.976344
Barbados	Age-standardized	Both sexes	Deaths	Rate (per 100k)	Staphylococcus aureus	Methicillin	Attributable	2003	1.98172	3.10416	0.859272
Brunei Darussalam	Age-standardized	Both sexes	Deaths	Rate (per 100k)	Staphylococcus aureus	Methicillin	Attributable	2003	0.676388	1.12072	0.232056
Bhutan	Age-standardized	Both sexes	Deaths	Rate (per 100k)	Staphylococcus aureus	Methicillin	Attributable	2003	0.584521	0.995966	0.173076
Botswana	Age-standardized	Both sexes	Deaths	Rate (per 100k)	Staphylococcus aureus	Methicillin	Attributable	2003	1.14336	1.79449	0.492221
Central African Republic	Age-standardized	Both sexes	Deaths	Rate (per 100k)	Staphylococcus aureus	Methicillin	Attributable	2003	1.93681	2.89808	0.975533
Canada	Age-standardized	Both sexes	Deaths	Rate (per 100k)	Staphylococcus aureus	Methicillin	Attributable	2003	1.11728	1.60057	0.633992
Switzerland	Age-standardized	Both sexes	Deaths	Rate (per 100k)	Staphylococcus aureus	Methicillin	Attributable	2003	0.308224	0.452309	0.164139
Chile	Age-standardized	Both sexes	Deaths	Rate (per 100k)	Staphylococcus aureus	Methicillin	Attributable	2003	2.60013	3.24419	1.95607
Côte d'Ivoire	Age-standardized	Both sexes	Deaths	Rate (per 100k)	Staphylococcus aureus	Methicillin	Attributable	2003	0.911236	1.49045	0.332026
Cameroon	Age-standardized	Both sexes	Deaths	Rate (per 100k)	Staphylococcus aureus	Methicillin	Attributable	2003	1.64687	2.48645	0.807288
Democratic Republic of the Congo	Age-standardized	Both sexes	Deaths	Rate (per 100k)	Staphylococcus aureus	Methicillin	Attributable	2003	1.66526	2.36934	0.961173
Congo	Age-standardized	Both sexes	Deaths	Rate (per 100k)	Staphylococcus aureus	Methicillin	Attributable	2003	2.45076	3.39782	1.5037
Cook Islands	Age-standardized	Both sexes	Deaths	Rate (per 100k)	Staphylococcus aureus	Methicillin	Attributable	2003	1.40516	2.29173	0.518585
Colombia	Age-standardized	Both sexes	Deaths	Rate (per 100k)	Staphylococcus aureus	Methicillin	Attributable	2003	1.43823	1.73978	1.13667
Comoros	Age-standardized	Both sexes	Deaths	Rate (per 100k)	Staphylococcus aureus	Methicillin	Attributable	2003	1.16985	2.03128	0.308419
Cabo Verde	Age-standardized	Both sexes	Deaths	Rate (per 100k)	Staphylococcus aureus	Methicillin	Attributable	2003	0.757256	1.31545	0.199065
Costa Rica	Age-standardized	Both sexes	Deaths	Rate (per 100k)	Staphylococcus aureus	Methicillin	Attributable	2003	1.77758	2.1864	1.36875
Cuba	Age-standardized	Both sexes	Deaths	Rate (per 100k)	Staphylococcus aureus	Methicillin	Attributable	2003	1.40261	1.89189	0.913333
Cyprus	Age-standardized	Both sexes	Deaths	Rate (per 100k)	Staphylococcus aureus	Methicillin	Attributable	2003	2.65549	3.14039	2.1706
Czechia	Age-standardized	Both sexes	Deaths	Rate (per 100k)	Staphylococcus aureus	Methicillin	Attributable	2003	0.550202	0.681199	0.419205
Germany	Age-standardized	Both sexes	Deaths	Rate (per 100k)	Staphylococcus aureus	Methicillin	Attributable	2003	0.777527	0.927469	0.627585
Djibouti	Age-standardized	Both sexes	Deaths	Rate (per 100k)	Staphylococcus aureus	Methicillin	Attributable	2003	0.780654	1.42147	0.139838
Dominica	Age-standardized	Both sexes	Deaths	Rate (per 100k)	Staphylococcus aureus	Methicillin	Attributable	2003	1.70088	2.64161	0.760148
Denmark	Age-standardized	Both sexes	Deaths	Rate (per 100k)	Staphylococcus aureus	Methicillin	Attributable	2003	0.131973	0.164829	0.0991161
Dominican Republic	Age-standardized	Both sexes	Deaths	Rate (per 100k)	Staphylococcus aureus	Methicillin	Attributable	2003	1.0509	1.3469	0.754908
Algeria	Age-standardized	Both sexes	Deaths	Rate (per 100k)	Staphylococcus aureus	Methicillin	Attributable	2003	1.67529	2.25186	1.09871
Ecuador	Age-standardized	Both sexes	Deaths	Rate (per 100k)	Staphylococcus aureus	Methicillin	Attributable	2003	1.4123	1.73173	1.09286
Eritrea	Age-standardized	Both sexes	Deaths	Rate (per 100k)	Staphylococcus aureus	Methicillin	Attributable	2003	0.822077	1.41734	0.226812
Spain	Age-standardized	Both sexes	Deaths	Rate (per 100k)	Staphylococcus aureus	Methicillin	Attributable	2003	1.28656	1.61485	0.958284
Estonia	Age-standardized	Both sexes	Deaths	Rate (per 100k)	Staphylococcus aureus	Methicillin	Attributable	2003	0.28683	0.372601	0.201058
Ethiopia	Age-standardized	Both sexes	Deaths	Rate (per 100k)	Staphylococcus aureus	Methicillin	Attributable	2003	1.52243	2.21596	0.828903
Finland	Age-standardized	Both sexes	Deaths	Rate (per 100k)	Staphylococcus aureus	Methicillin	Attributable	2003	0.14207	0.177738	0.106402
Fiji	Age-standardized	Both sexes	Deaths	Rate (per 100k)	Staphylococcus aureus	Methicillin	Attributable	2003	1.18648	1.93687	0.436101
France	Age-standardized	Both sexes	Deaths	Rate (per 100k)	Staphylococcus aureus	Methicillin	Attributable	2003	1.42677	1.72498	1.12856
Micronesia (Federated States of)	Age-standardized	Both sexes	Deaths	Rate (per 100k)	Staphylococcus aureus	Methicillin	Attributable	2003	1.15199	1.9709	0.333074
Gabon	Age-standardized	Both sexes	Deaths	Rate (per 100k)	Staphylococcus aureus	Methicillin	Attributable	2003	1.31831	2.08143	0.555194
United Kingdom	Age-standardized	Both sexes	Deaths	Rate (per 100k)	Staphylococcus aureus	Methicillin	Attributable	2003	2.43262	2.82526	2.03998
Georgia	Age-standardized	Both sexes	Deaths	Rate (per 100k)	Staphylococcus aureus	Methicillin	Attributable	2003	1.11964	1.6005	0.638781
Ghana	Age-standardized	Both sexes	Deaths	Rate (per 100k)	Staphylococcus aureus	Methicillin	Attributable	2003	1.4312	2.13805	0.724349
Guinea	Age-standardized	Both sexes	Deaths	Rate (per 100k)	Staphylococcus aureus	Methicillin	Attributable	2003	1.5546	2.6034	0.505803
Gambia	Age-standardized	Both sexes	Deaths	Rate (per 100k)	Staphylococcus aureus	Methicillin	Attributable	2003	1.44086	2.54248	0.339236
Guinea-Bissau	Age-standardized	Both sexes	Deaths	Rate (per 100k)	Staphylococcus aureus	Methicillin	Attributable	2003	1.32679	2.34515	0.308429
Equatorial Guinea	Age-standardized	Both sexes	Deaths	Rate (per 100k)	Staphylococcus aureus	Methicillin	Attributable	2003	1.53155	2.43039	0.632705
Greece	Age-standardized	Both sexes	Deaths	Rate (per 100k)	Staphylococcus aureus	Methicillin	Attributable	2003	1.95515	2.29706	1.61324
Grenada	Age-standardized	Both sexes	Deaths	Rate (per 100k)	Staphylococcus aureus	Methicillin	Attributable	2003	2.04214	3.27616	0.808118
Greenland	Age-standardized	Both sexes	Deaths	Rate (per 100k)	Staphylococcus aureus	Methicillin	Attributable	2003	1.32483	2.21664	0.433021
Guatemala	Age-standardized	Both sexes	Deaths	Rate (per 100k)	Staphylococcus aureus	Methicillin	Attributable	2003	3.16011	3.63285	2.68737
Guam	Age-standardized	Both sexes	Deaths	Rate (per 100k)	Staphylococcus aureus	Methicillin	Attributable	2003	0.736823	1.19682	0.276824
Guyana	Age-standardized	Both sexes	Deaths	Rate (per 100k)	Staphylococcus aureus	Methicillin	Attributable	2003	1.66367	2.65078	0.676549
Honduras	Age-standardized	Both sexes	Deaths	Rate (per 100k)	Staphylococcus aureus	Methicillin	Attributable	2003	0.827806	1.13707	0.518544
Croatia	Age-standardized	Both sexes	Deaths	Rate (per 100k)	Staphylococcus aureus	Methicillin	Attributable	2003	1.58275	1.88098	1.28451
Haiti	Age-standardized	Both sexes	Deaths	Rate (per 100k)	Staphylococcus aureus	Methicillin	Attributable	2003	1.20281	1.84139	0.564222
Hungary	Age-standardized	Both sexes	Deaths	Rate (per 100k)	Staphylococcus aureus	Methicillin	Attributable	2003	1.00242	1.30989	0.694943
Indonesia	Age-standardized	Both sexes	Deaths	Rate (per 100k)	Staphylococcus aureus	Methicillin	Attributable	2003	1.28997	1.89425	0.685695
India	Age-standardized	Both sexes	Deaths	Rate (per 100k)	Staphylococcus aureus	Methicillin	Attributable	2003	1.81657	2.21366	1.41948
Ireland	Age-standardized	Both sexes	Deaths	Rate (per 100k)	Staphylococcus aureus	Methicillin	Attributable	2003	2.72541	3.16965	2.28117
Iran (Islamic Republic of)	Age-standardized	Both sexes	Deaths	Rate (per 100k)	Staphylococcus aureus	Methicillin	Attributable	2003	1.65052	2.12325	1.1778
Iraq	Age-standardized	Both sexes	Deaths	Rate (per 100k)	Staphylococcus aureus	Methicillin	Attributable	2003	2.45174	2.88282	2.02066
Iceland	Age-standardized	Both sexes	Deaths	Rate (per 100k)	Staphylococcus aureus	Methicillin	Attributable	2003	0.673667	1.2014	0.14593
Israel	Age-standardized	Both sexes	Deaths	Rate (per 100k)	Staphylococcus aureus	Methicillin	Attributable	2003	1.7782	2.52338	1.03303
Italy	Age-standardized	Both sexes	Deaths	Rate (per 100k)	Staphylococcus aureus	Methicillin	Attributable	2003	1.3918	1.69209	1.09151
Jamaica	Age-standardized	Both sexes	Deaths	Rate (per 100k)	Staphylococcus aureus	Methicillin	Attributable	2003	1.06831	1.73863	0.39798
Jordan	Age-standardized	Both sexes	Deaths	Rate (per 100k)	Staphylococcus aureus	Methicillin	Attributable	2003	1.80964	2.58275	1.03654
Japan	Age-standardized	Both sexes	Deaths	Rate (per 100k)	Staphylococcus aureus	Methicillin	Attributable	2003	1.7097	2.11375	1.30566
Kazakhstan	Age-standardized	Both sexes	Deaths	Rate (per 100k)	Staphylococcus aureus	Methicillin	Attributable	2003	1.46116	2.37657	0.545745
Kenya	Age-standardized	Both sexes	Deaths	Rate (per 100k)	Staphylococcus aureus	Methicillin	Attributable	2003	1.56373	2.08768	1.03979
Kyrgyzstan	Age-standardized	Both sexes	Deaths	Rate (per 100k)	Staphylococcus aureus	Methicillin	Attributable	2003	1.03947	1.76288	0.316064
Cambodia	Age-standardized	Both sexes	Deaths	Rate (per 100k)	Staphylococcus aureus	Methicillin	Attributable	2003	0.645496	1.00534	0.285656
Kiribati	Age-standardized	Both sexes	Deaths	Rate (per 100k)	Staphylococcus aureus	Methicillin	Attributable	2003	1.21537	2.05722	0.373512
Saint Kitts and Nevis	Age-standardized	Both sexes	Deaths	Rate (per 100k)	Staphylococcus aureus	Methicillin	Attributable	2003	1.83483	2.9061	0.763551
Republic of Korea	Age-standardized	Both sexes	Deaths	Rate (per 100k)	Staphylococcus aureus	Methicillin	Attributable	2003	1.71046	2.38017	1.04074
Kuwait	Age-standardized	Both sexes	Deaths	Rate (per 100k)	Staphylococcus aureus	Methicillin	Attributable	2003	1.44027	1.80119	1.07935
Lao People's Democratic Republic	Age-standardized	Both sexes	Deaths	Rate (per 100k)	Staphylococcus aureus	Methicillin	Attributable	2003	0.295643	0.438077	0.153209
Lebanon	Age-standardized	Both sexes	Deaths	Rate (per 100k)	Staphylococcus aureus	Methicillin	Attributable	2003	0.54707	0.916958	0.177182
Liberia	Age-standardized	Both sexes	Deaths	Rate (per 100k)	Staphylococcus aureus	Methicillin	Attributable	2003	0.961672	1.69337	0.229976
Libya	Age-standardized	Both sexes	Deaths	Rate (per 100k)	Staphylococcus aureus	Methicillin	Attributable	2003	0.729944	1.10765	0.352241
Saint Lucia	Age-standardized	Both sexes	Deaths	Rate (per 100k)	Staphylococcus aureus	Methicillin	Attributable	2003	1.74355	2.6807	0.806399
Sri Lanka	Age-standardized	Both sexes	Deaths	Rate (per 100k)	Staphylococcus aureus	Methicillin	Attributable	2003	1.29864	1.9016	0.695684
Lesotho	Age-standardized	Both sexes	Deaths	Rate (per 100k)	Staphylococcus aureus	Methicillin	Attributable	2003	0.344921	0.593768	0.0960748
Lithuania	Age-standardized	Both sexes	Deaths	Rate (per 100k)	Staphylococcus aureus	Methicillin	Attributable	2003	0.407853	0.516804	0.298902
Luxembourg	Age-standardized	Both sexes	Deaths	Rate (per 100k)	Staphylococcus aureus	Methicillin	Attributable	2003	1.06573	1.28261	0.848841
Latvia	Age-standardized	Both sexes	Deaths	Rate (per 100k)	Staphylococcus aureus	Methicillin	Attributable	2003	0.900969	1.11685	0.685085
Morocco	Age-standardized	Both sexes	Deaths	Rate (per 100k)	Staphylococcus aureus	Methicillin	Attributable	2003	0.498801	0.680987	0.316615
Monaco	Age-standardized	Both sexes	Deaths	Rate (per 100k)	Staphylococcus aureus	Methicillin	Attributable	2003	0.907774	1.55228	0.263274
Republic of Moldova	Age-standardized	Both sexes	Deaths	Rate (per 100k)	Staphylococcus aureus	Methicillin	Attributable	2003	0.939428	1.5456	0.333252
Madagascar	Age-standardized	Both sexes	Deaths	Rate (per 100k)	Staphylococcus aureus	Methicillin	Attributable	2003	0.445764	0.639648	0.25188
Maldives	Age-standardized	Both sexes	Deaths	Rate (per 100k)	Staphylococcus aureus	Methicillin	Attributable	2003	0.943486	1.59604	0.290935
Mexico	Age-standardized	Both sexes	Deaths	Rate (per 100k)	Staphylococcus aureus	Methicillin	Attributable	2003	1.85224	2.29475	1.40973
Marshall Islands	Age-standardized	Both sexes	Deaths	Rate (per 100k)	Staphylococcus aureus	Methicillin	Attributable	2003	1.4558	2.38859	0.523017
North Macedonia	Age-standardized	Both sexes	Deaths	Rate (per 100k)	Staphylococcus aureus	Methicillin	Attributable	2003	2.48207	3.35863	1.60551
Mali	Age-standardized	Both sexes	Deaths	Rate (per 100k)	Staphylococcus aureus	Methicillin	Attributable	2003	1.95131	2.75962	1.143
Malta	Age-standardized	Both sexes	Deaths	Rate (per 100k)	Staphylococcus aureus	Methicillin	Attributable	2003	1.98506	2.29401	1.67611
Myanmar	Age-standardized	Both sexes	Deaths	Rate (per 100k)	Staphylococcus aureus	Methicillin	Attributable	2003	2.68381	3.52565	1.84196
Montenegro	Age-standardized	Both sexes	Deaths	Rate (per 100k)	Staphylococcus aureus	Methicillin	Attributable	2003	0.863052	1.37195	0.354155
Mongolia	Age-standardized	Both sexes	Deaths	Rate (per 100k)	Staphylococcus aureus	Methicillin	Attributable	2003	2.01558	2.89719	1.13397
Northern Mariana Islands	Age-standardized	Both sexes	Deaths	Rate (per 100k)	Staphylococcus aureus	Methicillin	Attributable	2003	1.19141	1.91103	0.471779
Mozambique	Age-standardized	Both sexes	Deaths	Rate (per 100k)	Staphylococcus aureus	Methicillin	Attributable	2003	1.10018	1.75588	0.444471
Mauritania	Age-standardized	Both sexes	Deaths	Rate (per 100k)	Staphylococcus aureus	Methicillin	Attributable	2003	0.937294	1.52859	0.345999
Mauritius	Age-standardized	Both sexes	Deaths	Rate (per 100k)	Staphylococcus aureus	Methicillin	Attributable	2003	0.915849	1.5594	0.272296
Malawi	Age-standardized	Both sexes	Deaths	Rate (per 100k)	Staphylococcus aureus	Methicillin	Attributable	2003	1.52108	2.23415	0.808011
Malaysia	Age-standardized	Both sexes	Deaths	Rate (per 100k)	Staphylococcus aureus	Methicillin	Attributable	2003	1.60472	1.88399	1.32544
Namibia	Age-standardized	Both sexes	Deaths	Rate (per 100k)	Staphylococcus aureus	Methicillin	Attributable	2003	1.11166	2.01827	0.205056
Niger	Age-standardized	Both sexes	Deaths	Rate (per 100k)	Staphylococcus aureus	Methicillin	Attributable	2003	1.23729	2.10424	0.370341
Nigeria	Age-standardized	Both sexes	Deaths	Rate (per 100k)	Staphylococcus aureus	Methicillin	Attributable	2003	1.93998	2.46707	1.41288
Nicaragua	Age-standardized	Both sexes	Deaths	Rate (per 100k)	Staphylococcus aureus	Methicillin	Attributable	2003	1.08312	1.45408	0.712173
Niue	Age-standardized	Both sexes	Deaths	Rate (per 100k)	Staphylococcus aureus	Methicillin	Attributable	2003	1.62973	2.68976	0.569695
Netherlands	Age-standardized	Both sexes	Deaths	Rate (per 100k)	Staphylococcus aureus	Methicillin	Attributable	2003	0.120882	0.15082	0.090944
Norway	Age-standardized	Both sexes	Deaths	Rate (per 100k)	Staphylococcus aureus	Methicillin	Attributable	2003	0.292581	0.490461	0.0947022
Nepal	Age-standardized	Both sexes	Deaths	Rate (per 100k)	Staphylococcus aureus	Methicillin	Attributable	2003	1.14244	1.75533	0.529556
Nauru	Age-standardized	Both sexes	Deaths	Rate (per 100k)	Staphylococcus aureus	Methicillin	Attributable	2003	1.6048	2.70448	0.505118
New Zealand	Age-standardized	Both sexes	Deaths	Rate (per 100k)	Staphylococcus aureus	Methicillin	Attributable	2003	0.295153	0.35623	0.234076
Oman	Age-standardized	Both sexes	Deaths	Rate (per 100k)	Staphylococcus aureus	Methicillin	Attributable	2003	0.710297	1.20021	0.220389
Pakistan	Age-standardized	Both sexes	Deaths	Rate (per 100k)	Staphylococcus aureus	Methicillin	Attributable	2003	1.47118	1.82363	1.11873
Panama	Age-standardized	Both sexes	Deaths	Rate (per 100k)	Staphylococcus aureus	Methicillin	Attributable	2003	1.00556	1.26734	0.743771
Peru	Age-standardized	Both sexes	Deaths	Rate (per 100k)	Staphylococcus aureus	Methicillin	Attributable	2003	2.37118	2.85323	1.88913
Philippines	Age-standardized	Both sexes	Deaths	Rate (per 100k)	Staphylococcus aureus	Methicillin	Attributable	2003	2.2586	2.7902	1.727
Palau	Age-standardized	Both sexes	Deaths	Rate (per 100k)	Staphylococcus aureus	Methicillin	Attributable	2003	1.4504	2.45733	0.443465
Papua New Guinea	Age-standardized	Both sexes	Deaths	Rate (per 100k)	Staphylococcus aureus	Methicillin	Attributable	2003	0.940232	1.62347	0.256995
Poland	Age-standardized	Both sexes	Deaths	Rate (per 100k)	Staphylococcus aureus	Methicillin	Attributable	2003	0.920338	1.1225	0.718175
Puerto Rico	Age-standardized	Both sexes	Deaths	Rate (per 100k)	Staphylococcus aureus	Methicillin	Attributable	2003	1.55103	2.40502	0.697046
Democratic People's Republic of Korea	Age-standardized	Both sexes	Deaths	Rate (per 100k)	Staphylococcus aureus	Methicillin	Attributable	2003	1.43055	2.22707	0.634036
Portugal	Age-standardized	Both sexes	Deaths	Rate (per 100k)	Staphylococcus aureus	Methicillin	Attributable	2003	2.08626	2.46422	1.7083
Paraguay	Age-standardized	Both sexes	Deaths	Rate (per 100k)	Staphylococcus aureus	Methicillin	Attributable	2003	1.11663	1.37132	0.861941
Palestine	Age-standardized	Both sexes	Deaths	Rate (per 100k)	Staphylococcus aureus	Methicillin	Attributable	2003	2.22371	3.20259	1.24483
Qatar	Age-standardized	Both sexes	Deaths	Rate (per 100k)	Staphylococcus aureus	Methicillin	Attributable	2003	3.04344	4.32743	1.75945
Romania	Age-standardized	Both sexes	Deaths	Rate (per 100k)	Staphylococcus aureus	Methicillin	Attributable	2003	2.20585	2.70663	1.70508
Russian Federation	Age-standardized	Both sexes	Deaths	Rate (per 100k)	Staphylococcus aureus	Methicillin	Attributable	2003	1.33447	1.90468	0.764261
Rwanda	Age-standardized	Both sexes	Deaths	Rate (per 100k)	Staphylococcus aureus	Methicillin	Attributable	2003	2.86607	4.01969	1.71246
Saudi Arabia	Age-standardized	Both sexes	Deaths	Rate (per 100k)	Staphylococcus aureus	Methicillin	Attributable	2003	1.24628	1.77792	0.714636
Senegal	Age-standardized	Both sexes	Deaths	Rate (per 100k)	Staphylococcus aureus	Methicillin	Attributable	2003	1.34637	1.97367	0.719076
Singapore	Age-standardized	Both sexes	Deaths	Rate (per 100k)	Staphylococcus aureus	Methicillin	Attributable	2003	0.515448	0.79806	0.232835
Solomon Islands	Age-standardized	Both sexes	Deaths	Rate (per 100k)	Staphylococcus aureus	Methicillin	Attributable	2003	0.994375	1.72559	0.263158
Sierra Leone	Age-standardized	Both sexes	Deaths	Rate (per 100k)	Staphylococcus aureus	Methicillin	Attributable	2003	1.5106	2.51034	0.510861
El Salvador	Age-standardized	Both sexes	Deaths	Rate (per 100k)	Staphylococcus aureus	Methicillin	Attributable	2003	1.66875	1.88346	1.45404
San Marino	Age-standardized	Both sexes	Deaths	Rate (per 100k)	Staphylococcus aureus	Methicillin	Attributable	2003	0.781553	1.35371	0.209398
Somalia	Age-standardized	Both sexes	Deaths	Rate (per 100k)	Staphylococcus aureus	Methicillin	Attributable	2003	2.29172	3.41052	1.17292
Serbia	Age-standardized	Both sexes	Deaths	Rate (per 100k)	Staphylococcus aureus	Methicillin	Attributable	2003	1.61219	2.29511	0.92927
South Sudan	Age-standardized	Both sexes	Deaths	Rate (per 100k)	Staphylococcus aureus	Methicillin	Attributable	2003	0.964432	1.7167	0.212161
Sao Tome and Principe	Age-standardized	Both sexes	Deaths	Rate (per 100k)	Staphylococcus aureus	Methicillin	Attributable	2003	1.20675	2.11539	0.298101
Suriname	Age-standardized	Both sexes	Deaths	Rate (per 100k)	Staphylococcus aureus	Methicillin	Attributable	2003	0.959805	1.62006	0.299554
Slovakia	Age-standardized	Both sexes	Deaths	Rate (per 100k)	Staphylococcus aureus	Methicillin	Attributable	2003	0.901183	1.2238	0.578567
Slovenia	Age-standardized	Both sexes	Deaths	Rate (per 100k)	Staphylococcus aureus	Methicillin	Attributable	2003	0.715214	0.857491	0.572937
Sweden	Age-standardized	Both sexes	Deaths	Rate (per 100k)	Staphylococcus aureus	Methicillin	Attributable	2003	0.217694	0.282998	0.15239
Eswatini	Age-standardized	Both sexes	Deaths	Rate (per 100k)	Staphylococcus aureus	Methicillin	Attributable	2003	0.672916	1.14584	0.199991
Seychelles	Age-standardized	Both sexes	Deaths	Rate (per 100k)	Staphylococcus aureus	Methicillin	Attributable	2003	1.08828	1.88872	0.287844
Syrian Arab Republic	Age-standardized	Both sexes	Deaths	Rate (per 100k)	Staphylococcus aureus	Methicillin	Attributable	2003	1.52536	2.2406	0.810125
Chad	Age-standardized	Both sexes	Deaths	Rate (per 100k)	Staphylococcus aureus	Methicillin	Attributable	2003	1.31665	2.21333	0.41998
Togo	Age-standardized	Both sexes	Deaths	Rate (per 100k)	Staphylococcus aureus	Methicillin	Attributable	2003	0.964641	1.58573	0.343553
Thailand	Age-standardized	Both sexes	Deaths	Rate (per 100k)	Staphylococcus aureus	Methicillin	Attributable	2003	1.13594	1.66512	0.606769
Tajikistan	Age-standardized	Both sexes	Deaths	Rate (per 100k)	Staphylococcus aureus	Methicillin	Attributable	2003	0.979089	1.65361	0.304567
Tokelau	Age-standardized	Both sexes	Deaths	Rate (per 100k)	Staphylococcus aureus	Methicillin	Attributable	2003	1.18013	1.9855	0.374761
Turkmenistan	Age-standardized	Both sexes	Deaths	Rate (per 100k)	Staphylococcus aureus	Methicillin	Attributable	2003	0.994611	1.68529	0.30393
Timor-Leste	Age-standardized	Both sexes	Deaths	Rate (per 100k)	Staphylococcus aureus	Methicillin	Attributable	2003	0.677046	1.20919	0.144898
Tonga	Age-standardized	Both sexes	Deaths	Rate (per 100k)	Staphylococcus aureus	Methicillin	Attributable	2003	1.00265	1.74652	0.258768
Trinidad and Tobago	Age-standardized	Both sexes	Deaths	Rate (per 100k)	Staphylococcus aureus	Methicillin	Attributable	2003	1.54397	2.41474	0.673198
Tunisia	Age-standardized	Both sexes	Deaths	Rate (per 100k)	Staphylococcus aureus	Methicillin	Attributable	2003	1.04566	1.46079	0.630526
Türkiye	Age-standardized	Both sexes	Deaths	Rate (per 100k)	Staphylococcus aureus	Methicillin	Attributable	2003	1.41479	1.88768	0.941901
Tuvalu	Age-standardized	Both sexes	Deaths	Rate (per 100k)	Staphylococcus aureus	Methicillin	Attributable	2003	1.00427	1.75883	0.249702
Taiwan (Province of China)	Age-standardized	Both sexes	Deaths	Rate (per 100k)	Staphylococcus aureus	Methicillin	Attributable	2003	3.21354	3.75094	2.67614
United Republic of Tanzania	Age-standardized	Both sexes	Deaths	Rate (per 100k)	Staphylococcus aureus	Methicillin	Attributable	2003	0.15505	0.268487	0.0416132
Uganda	Age-standardized	Both sexes	Deaths	Rate (per 100k)	Staphylococcus aureus	Methicillin	Attributable	2003	1.63608	2.28217	0.989988
Ukraine	Age-standardized	Both sexes	Deaths	Rate (per 100k)	Staphylococcus aureus	Methicillin	Attributable	2003	0.928211	1.51419	0.342235
Uruguay	Age-standardized	Both sexes	Deaths	Rate (per 100k)	Staphylococcus aureus	Methicillin	Attributable	2003	2.38898	2.98636	1.7916
United States of America	Age-standardized	Both sexes	Deaths	Rate (per 100k)	Staphylococcus aureus	Methicillin	Attributable	2003	2.3943	3.01733	1.77128
Uzbekistan	Age-standardized	Both sexes	Deaths	Rate (per 100k)	Staphylococcus aureus	Methicillin	Attributable	2003	0.924833	1.5667	0.282963
Saint Vincent and the Grenadines	Age-standardized	Both sexes	Deaths	Rate (per 100k)	Staphylococcus aureus	Methicillin	Attributable	2003	1.52975	2.41711	0.642399
Venezuela (Bolivarian Republic of)	Age-standardized	Both sexes	Deaths	Rate (per 100k)	Staphylococcus aureus	Methicillin	Attributable	2003	0.806159	1.01613	0.596187
United States Virgin Islands	Age-standardized	Both sexes	Deaths	Rate (per 100k)	Staphylococcus aureus	Methicillin	Attributable	2003	1.5581	2.45656	0.659652
Viet Nam	Age-standardized	Both sexes	Deaths	Rate (per 100k)	Staphylococcus aureus	Methicillin	Attributable	2003	1.41776	1.98017	0.855344
Vanuatu	Age-standardized	Both sexes	Deaths	Rate (per 100k)	Staphylococcus aureus	Methicillin	Attributable	2003	0.875382	1.52368	0.227082
Samoa	Age-standardized	Both sexes	Deaths	Rate (per 100k)	Staphylococcus aureus	Methicillin	Attributable	2003	0.926811	1.59083	0.262789
Yemen	Age-standardized	Both sexes	Deaths	Rate (per 100k)	Staphylococcus aureus	Methicillin	Attributable	2003	1.1447	1.83988	0.449521
South Africa	Age-standardized	Both sexes	Deaths	Rate (per 100k)	Staphylococcus aureus	Methicillin	Attributable	2003	1.87814	2.30296	1.45333
Zambia	Age-standardized	Both sexes	Deaths	Rate (per 100k)	Staphylococcus aureus	Methicillin	Attributable	2003	1.52487	2.47367	0.576078
Zimbabwe	Age-standardized	Both sexes	Deaths	Rate (per 100k)	Staphylococcus aureus	Methicillin	Attributable	2003	1.29978	2.26871	0.330845
Egypt	Age-standardized	Both sexes	Deaths	Rate (per 100k)	Staphylococcus aureus	Methicillin	Attributable	2003	3.21212	4.02538	2.39887
Sudan	Age-standardized	Both sexes	Deaths	Rate (per 100k)	Staphylococcus aureus	Methicillin	Attributable	2003	0.891815	1.31361	0.470021
China	Age-standardized	Both sexes	Deaths	Rate (per 100k)	Staphylococcus aureus	Methicillin	Attributable	2003	2.55692	2.97903	2.13481
Afghanistan	Age-standardized	Both sexes	Deaths	Rate (per 100k)	Staphylococcus aureus	Methicillin	Attributable	2004	2.49349	3.43593	1.55105
Angola	Age-standardized	Both sexes	Deaths	Rate (per 100k)	Staphylococcus aureus	Methicillin	Attributable	2004	0.168007	0.285161	0.0508531
Albania	Age-standardized	Both sexes	Deaths	Rate (per 100k)	Staphylococcus aureus	Methicillin	Attributable	2004	0.916066	1.51526	0.316868
Andorra	Age-standardized	Both sexes	Deaths	Rate (per 100k)	Staphylococcus aureus	Methicillin	Attributable	2004	0.779762	1.34758	0.211948
United Arab Emirates	Age-standardized	Both sexes	Deaths	Rate (per 100k)	Staphylococcus aureus	Methicillin	Attributable	2004	1.38534	2.17757	0.593098
Argentina	Age-standardized	Both sexes	Deaths	Rate (per 100k)	Staphylococcus aureus	Methicillin	Attributable	2004	2.71736	3.15155	2.28317
Armenia	Age-standardized	Both sexes	Deaths	Rate (per 100k)	Staphylococcus aureus	Methicillin	Attributable	2004	1.13436	1.8556	0.413115
American Samoa	Age-standardized	Both sexes	Deaths	Rate (per 100k)	Staphylococcus aureus	Methicillin	Attributable	2004	1.39672	2.28711	0.506326
Antigua and Barbuda	Age-standardized	Both sexes	Deaths	Rate (per 100k)	Staphylococcus aureus	Methicillin	Attributable	2004	1.28633	2.12052	0.452138
Australia	Age-standardized	Both sexes	Deaths	Rate (per 100k)	Staphylococcus aureus	Methicillin	Attributable	2004	0.839205	1.01257	0.665838
Austria	Age-standardized	Both sexes	Deaths	Rate (per 100k)	Staphylococcus aureus	Methicillin	Attributable	2004	0.544919	0.674438	0.415399
Azerbaijan	Age-standardized	Both sexes	Deaths	Rate (per 100k)	Staphylococcus aureus	Methicillin	Attributable	2004	0.804126	1.35936	0.248887
Burundi	Age-standardized	Both sexes	Deaths	Rate (per 100k)	Staphylococcus aureus	Methicillin	Attributable	2004	1.10695	1.98165	0.232247
Belgium	Age-standardized	Both sexes	Deaths	Rate (per 100k)	Staphylococcus aureus	Methicillin	Attributable	2004	1.57597	1.88956	1.26238
Benin	Age-standardized	Both sexes	Deaths	Rate (per 100k)	Staphylococcus aureus	Methicillin	Attributable	2004	1.48077	2.13064	0.830904
Burkina Faso	Age-standardized	Both sexes	Deaths	Rate (per 100k)	Staphylococcus aureus	Methicillin	Attributable	2004	0.47293	0.805799	0.140061
Bangladesh	Age-standardized	Both sexes	Deaths	Rate (per 100k)	Staphylococcus aureus	Methicillin	Attributable	2004	1.32336	2.01673	0.629994
Bulgaria	Age-standardized	Both sexes	Deaths	Rate (per 100k)	Staphylococcus aureus	Methicillin	Attributable	2004	1.80426	2.10546	1.50306
Bahrain	Age-standardized	Both sexes	Deaths	Rate (per 100k)	Staphylococcus aureus	Methicillin	Attributable	2004	2.8065	4.16636	1.44663
Bahamas	Age-standardized	Both sexes	Deaths	Rate (per 100k)	Staphylococcus aureus	Methicillin	Attributable	2004	1.65327	2.63273	0.673813
Bosnia and Herzegovina	Age-standardized	Both sexes	Deaths	Rate (per 100k)	Staphylococcus aureus	Methicillin	Attributable	2004	0.710088	1.08739	0.332781
Belarus	Age-standardized	Both sexes	Deaths	Rate (per 100k)	Staphylococcus aureus	Methicillin	Attributable	2004	1.04368	1.53581	0.55156
Belize	Age-standardized	Both sexes	Deaths	Rate (per 100k)	Staphylococcus aureus	Methicillin	Attributable	2004	1.37648	2.21389	0.539064
Bermuda	Age-standardized	Both sexes	Deaths	Rate (per 100k)	Staphylococcus aureus	Methicillin	Attributable	2004	1.26288	2.05395	0.471807
Bolivia (Plurinational State of)	Age-standardized	Both sexes	Deaths	Rate (per 100k)	Staphylococcus aureus	Methicillin	Attributable	2004	1.88847	2.39747	1.37947
Brazil	Age-standardized	Both sexes	Deaths	Rate (per 100k)	Staphylococcus aureus	Methicillin	Attributable	2004	1.46446	1.92017	1.00876
Barbados	Age-standardized	Both sexes	Deaths	Rate (per 100k)	Staphylococcus aureus	Methicillin	Attributable	2004	2.03619	3.18437	0.888016
Brunei Darussalam	Age-standardized	Both sexes	Deaths	Rate (per 100k)	Staphylococcus aureus	Methicillin	Attributable	2004	0.710299	1.16548	0.255123
Bhutan	Age-standardized	Both sexes	Deaths	Rate (per 100k)	Staphylococcus aureus	Methicillin	Attributable	2004	0.593766	0.994765	0.192766
Botswana	Age-standardized	Both sexes	Deaths	Rate (per 100k)	Staphylococcus aureus	Methicillin	Attributable	2004	1.1189	1.72663	0.511179
Central African Republic	Age-standardized	Both sexes	Deaths	Rate (per 100k)	Staphylococcus aureus	Methicillin	Attributable	2004	1.93543	2.87243	0.998427
Canada	Age-standardized	Both sexes	Deaths	Rate (per 100k)	Staphylococcus aureus	Methicillin	Attributable	2004	1.1344	1.59402	0.674793
Switzerland	Age-standardized	Both sexes	Deaths	Rate (per 100k)	Staphylococcus aureus	Methicillin	Attributable	2004	0.310737	0.445667	0.175807
Chile	Age-standardized	Both sexes	Deaths	Rate (per 100k)	Staphylococcus aureus	Methicillin	Attributable	2004	2.61391	3.23273	1.99509
Côte d'Ivoire	Age-standardized	Both sexes	Deaths	Rate (per 100k)	Staphylococcus aureus	Methicillin	Attributable	2004	0.928014	1.51159	0.344435
Cameroon	Age-standardized	Both sexes	Deaths	Rate (per 100k)	Staphylococcus aureus	Methicillin	Attributable	2004	1.59732	2.39075	0.803887
Democratic Republic of the Congo	Age-standardized	Both sexes	Deaths	Rate (per 100k)	Staphylococcus aureus	Methicillin	Attributable	2004	1.59163	2.26427	0.918993
Congo	Age-standardized	Both sexes	Deaths	Rate (per 100k)	Staphylococcus aureus	Methicillin	Attributable	2004	2.68442	3.58074	1.7881
Cook Islands	Age-standardized	Both sexes	Deaths	Rate (per 100k)	Staphylococcus aureus	Methicillin	Attributable	2004	1.44047	2.31763	0.563302
Colombia	Age-standardized	Both sexes	Deaths	Rate (per 100k)	Staphylococcus aureus	Methicillin	Attributable	2004	1.44731	1.73171	1.16292
Comoros	Age-standardized	Both sexes	Deaths	Rate (per 100k)	Staphylococcus aureus	Methicillin	Attributable	2004	1.16087	2.0049	0.316849
Cabo Verde	Age-standardized	Both sexes	Deaths	Rate (per 100k)	Staphylococcus aureus	Methicillin	Attributable	2004	0.761588	1.32169	0.201487
Costa Rica	Age-standardized	Both sexes	Deaths	Rate (per 100k)	Staphylococcus aureus	Methicillin	Attributable	2004	1.79364	2.19449	1.3928
Cuba	Age-standardized	Both sexes	Deaths	Rate (per 100k)	Staphylococcus aureus	Methicillin	Attributable	2004	1.48379	1.98481	0.982775
Cyprus	Age-standardized	Both sexes	Deaths	Rate (per 100k)	Staphylococcus aureus	Methicillin	Attributable	2004	2.43928	2.8753	2.00326
Czechia	Age-standardized	Both sexes	Deaths	Rate (per 100k)	Staphylococcus aureus	Methicillin	Attributable	2004	0.607527	0.742293	0.472761
Germany	Age-standardized	Both sexes	Deaths	Rate (per 100k)	Staphylococcus aureus	Methicillin	Attributable	2004	0.790679	0.942475	0.638883
Djibouti	Age-standardized	Both sexes	Deaths	Rate (per 100k)	Staphylococcus aureus	Methicillin	Attributable	2004	0.807532	1.45676	0.158308
Dominica	Age-standardized	Both sexes	Deaths	Rate (per 100k)	Staphylococcus aureus	Methicillin	Attributable	2004	1.78651	2.72811	0.84491
Denmark	Age-standardized	Both sexes	Deaths	Rate (per 100k)	Staphylococcus aureus	Methicillin	Attributable	2004	0.139938	0.170326	0.109551
Dominican Republic	Age-standardized	Both sexes	Deaths	Rate (per 100k)	Staphylococcus aureus	Methicillin	Attributable	2004	1.14876	1.44903	0.84849
Algeria	Age-standardized	Both sexes	Deaths	Rate (per 100k)	Staphylococcus aureus	Methicillin	Attributable	2004	1.68298	2.25634	1.10962
Ecuador	Age-standardized	Both sexes	Deaths	Rate (per 100k)	Staphylococcus aureus	Methicillin	Attributable	2004	1.50769	1.81761	1.19777
Eritrea	Age-standardized	Both sexes	Deaths	Rate (per 100k)	Staphylococcus aureus	Methicillin	Attributable	2004	0.833773	1.43301	0.234532
Spain	Age-standardized	Both sexes	Deaths	Rate (per 100k)	Staphylococcus aureus	Methicillin	Attributable	2004	1.31378	1.63261	0.994959
Estonia	Age-standardized	Both sexes	Deaths	Rate (per 100k)	Staphylococcus aureus	Methicillin	Attributable	2004	0.289981	0.373363	0.206599
Ethiopia	Age-standardized	Both sexes	Deaths	Rate (per 100k)	Staphylococcus aureus	Methicillin	Attributable	2004	1.42424	2.04406	0.804408
Finland	Age-standardized	Both sexes	Deaths	Rate (per 100k)	Staphylococcus aureus	Methicillin	Attributable	2004	0.14098	0.174986	0.106975
Fiji	Age-standardized	Both sexes	Deaths	Rate (per 100k)	Staphylococcus aureus	Methicillin	Attributable	2004	1.22789	1.96623	0.489556
France	Age-standardized	Both sexes	Deaths	Rate (per 100k)	Staphylococcus aureus	Methicillin	Attributable	2004	1.48671	1.78407	1.18936
Micronesia (Federated States of)	Age-standardized	Both sexes	Deaths	Rate (per 100k)	Staphylococcus aureus	Methicillin	Attributable	2004	1.11466	1.90744	0.321875
Gabon	Age-standardized	Both sexes	Deaths	Rate (per 100k)	Staphylococcus aureus	Methicillin	Attributable	2004	1.67074	2.51691	0.824572
United Kingdom	Age-standardized	Both sexes	Deaths	Rate (per 100k)	Staphylococcus aureus	Methicillin	Attributable	2004	2.3702	2.74799	1.99242
Georgia	Age-standardized	Both sexes	Deaths	Rate (per 100k)	Staphylococcus aureus	Methicillin	Attributable	2004	0.9421	1.35755	0.526655
Ghana	Age-standardized	Both sexes	Deaths	Rate (per 100k)	Staphylococcus aureus	Methicillin	Attributable	2004	1.45673	2.13994	0.773518
Guinea	Age-standardized	Both sexes	Deaths	Rate (per 100k)	Staphylococcus aureus	Methicillin	Attributable	2004	1.55106	2.59938	0.502734
Gambia	Age-standardized	Both sexes	Deaths	Rate (per 100k)	Staphylococcus aureus	Methicillin	Attributable	2004	1.5914	2.80757	0.375232
Guinea-Bissau	Age-standardized	Both sexes	Deaths	Rate (per 100k)	Staphylococcus aureus	Methicillin	Attributable	2004	1.34309	2.36963	0.316555
Equatorial Guinea	Age-standardized	Both sexes	Deaths	Rate (per 100k)	Staphylococcus aureus	Methicillin	Attributable	2004	1.52188	2.40997	0.633786
Greece	Age-standardized	Both sexes	Deaths	Rate (per 100k)	Staphylococcus aureus	Methicillin	Attributable	2004	1.98097	2.31435	1.64759
Grenada	Age-standardized	Both sexes	Deaths	Rate (per 100k)	Staphylococcus aureus	Methicillin	Attributable	2004	2.2025	3.5022	0.902807
Greenland	Age-standardized	Both sexes	Deaths	Rate (per 100k)	Staphylococcus aureus	Methicillin	Attributable	2004	1.36859	2.2717	0.465475
Guatemala	Age-standardized	Both sexes	Deaths	Rate (per 100k)	Staphylococcus aureus	Methicillin	Attributable	2004	3.19686	3.64747	2.74624
Guam	Age-standardized	Both sexes	Deaths	Rate (per 100k)	Staphylococcus aureus	Methicillin	Attributable	2004	0.70826	1.15219	0.264326
Guyana	Age-standardized	Both sexes	Deaths	Rate (per 100k)	Staphylococcus aureus	Methicillin	Attributable	2004	1.81314	2.84061	0.785678
Honduras	Age-standardized	Both sexes	Deaths	Rate (per 100k)	Staphylococcus aureus	Methicillin	Attributable	2004	0.872137	1.17321	0.571066
Croatia	Age-standardized	Both sexes	Deaths	Rate (per 100k)	Staphylococcus aureus	Methicillin	Attributable	2004	1.65614	1.94167	1.37062
Haiti	Age-standardized	Both sexes	Deaths	Rate (per 100k)	Staphylococcus aureus	Methicillin	Attributable	2004	1.18812	1.80626	0.569975
Hungary	Age-standardized	Both sexes	Deaths	Rate (per 100k)	Staphylococcus aureus	Methicillin	Attributable	2004	1.07158	1.37132	0.771838
Indonesia	Age-standardized	Both sexes	Deaths	Rate (per 100k)	Staphylococcus aureus	Methicillin	Attributable	2004	1.34692	1.94704	0.746796
India	Age-standardized	Both sexes	Deaths	Rate (per 100k)	Staphylococcus aureus	Methicillin	Attributable	2004	1.82396	2.20378	1.44413
Ireland	Age-standardized	Both sexes	Deaths	Rate (per 100k)	Staphylococcus aureus	Methicillin	Attributable	2004	2.67956	3.09344	2.26567
Iran (Islamic Republic of)	Age-standardized	Both sexes	Deaths	Rate (per 100k)	Staphylococcus aureus	Methicillin	Attributable	2004	1.64644	2.12108	1.17179
Iraq	Age-standardized	Both sexes	Deaths	Rate (per 100k)	Staphylococcus aureus	Methicillin	Attributable	2004	2.47984	2.94253	2.01716
Iceland	Age-standardized	Both sexes	Deaths	Rate (per 100k)	Staphylococcus aureus	Methicillin	Attributable	2004	0.678122	1.20501	0.151236
Israel	Age-standardized	Both sexes	Deaths	Rate (per 100k)	Staphylococcus aureus	Methicillin	Attributable	2004	1.85059	2.57364	1.12754
Italy	Age-standardized	Both sexes	Deaths	Rate (per 100k)	Staphylococcus aureus	Methicillin	Attributable	2004	1.3767	1.66012	1.09329
Jamaica	Age-standardized	Both sexes	Deaths	Rate (per 100k)	Staphylococcus aureus	Methicillin	Attributable	2004	1.02641	1.66916	0.38366
Jordan	Age-standardized	Both sexes	Deaths	Rate (per 100k)	Staphylococcus aureus	Methicillin	Attributable	2004	1.92152	2.70264	1.14039
Japan	Age-standardized	Both sexes	Deaths	Rate (per 100k)	Staphylococcus aureus	Methicillin	Attributable	2004	1.72577	2.09315	1.35839
Kazakhstan	Age-standardized	Both sexes	Deaths	Rate (per 100k)	Staphylococcus aureus	Methicillin	Attributable	2004	1.55266	2.49303	0.612291
Kenya	Age-standardized	Both sexes	Deaths	Rate (per 100k)	Staphylococcus aureus	Methicillin	Attributable	2004	1.67188	2.17579	1.16796
Kyrgyzstan	Age-standardized	Both sexes	Deaths	Rate (per 100k)	Staphylococcus aureus	Methicillin	Attributable	2004	1.05879	1.79282	0.324758
Cambodia	Age-standardized	Both sexes	Deaths	Rate (per 100k)	Staphylococcus aureus	Methicillin	Attributable	2004	0.656252	1.01092	0.301582
Kiribati	Age-standardized	Both sexes	Deaths	Rate (per 100k)	Staphylococcus aureus	Methicillin	Attributable	2004	1.24696	2.10028	0.393643
Saint Kitts and Nevis	Age-standardized	Both sexes	Deaths	Rate (per 100k)	Staphylococcus aureus	Methicillin	Attributable	2004	1.91216	3.01292	0.811397
Republic of Korea	Age-standardized	Both sexes	Deaths	Rate (per 100k)	Staphylococcus aureus	Methicillin	Attributable	2004	1.68449	2.30876	1.06022
Kuwait	Age-standardized	Both sexes	Deaths	Rate (per 100k)	Staphylococcus aureus	Methicillin	Attributable	2004	1.63957	2.02525	1.25389
Lao People's Democratic Republic	Age-standardized	Both sexes	Deaths	Rate (per 100k)	Staphylococcus aureus	Methicillin	Attributable	2004	0.305273	0.447769	0.162777
Lebanon	Age-standardized	Both sexes	Deaths	Rate (per 100k)	Staphylococcus aureus	Methicillin	Attributable	2004	0.651838	1.07434	0.229331
Liberia	Age-standardized	Both sexes	Deaths	Rate (per 100k)	Staphylococcus aureus	Methicillin	Attributable	2004	0.90034	1.57607	0.224606
Libya	Age-standardized	Both sexes	Deaths	Rate (per 100k)	Staphylococcus aureus	Methicillin	Attributable	2004	0.84145	1.24997	0.432928
Saint Lucia	Age-standardized	Both sexes	Deaths	Rate (per 100k)	Staphylococcus aureus	Methicillin	Attributable	2004	1.76543	2.70569	0.82518
Sri Lanka	Age-standardized	Both sexes	Deaths	Rate (per 100k)	Staphylococcus aureus	Methicillin	Attributable	2004	1.63148	2.26484	0.998117
Lesotho	Age-standardized	Both sexes	Deaths	Rate (per 100k)	Staphylococcus aureus	Methicillin	Attributable	2004	0.39772	0.684336	0.111104
Lithuania	Age-standardized	Both sexes	Deaths	Rate (per 100k)	Staphylococcus aureus	Methicillin	Attributable	2004	0.412445	0.518693	0.306196
Luxembourg	Age-standardized	Both sexes	Deaths	Rate (per 100k)	Staphylococcus aureus	Methicillin	Attributable	2004	1.06841	1.27222	0.864603
Latvia	Age-standardized	Both sexes	Deaths	Rate (per 100k)	Staphylococcus aureus	Methicillin	Attributable	2004	0.881845	1.07231	0.691375
Morocco	Age-standardized	Both sexes	Deaths	Rate (per 100k)	Staphylococcus aureus	Methicillin	Attributable	2004	0.527583	0.711591	0.343575
Monaco	Age-standardized	Both sexes	Deaths	Rate (per 100k)	Staphylococcus aureus	Methicillin	Attributable	2004	0.93377	1.58822	0.279319
Republic of Moldova	Age-standardized	Both sexes	Deaths	Rate (per 100k)	Staphylococcus aureus	Methicillin	Attributable	2004	0.954027	1.56529	0.342767
Madagascar	Age-standardized	Both sexes	Deaths	Rate (per 100k)	Staphylococcus aureus	Methicillin	Attributable	2004	0.466991	0.661866	0.272116
Maldives	Age-standardized	Both sexes	Deaths	Rate (per 100k)	Staphylococcus aureus	Methicillin	Attributable	2004	0.937376	1.57506	0.299694
Mexico	Age-standardized	Both sexes	Deaths	Rate (per 100k)	Staphylococcus aureus	Methicillin	Attributable	2004	1.83137	2.24718	1.41555
Marshall Islands	Age-standardized	Both sexes	Deaths	Rate (per 100k)	Staphylococcus aureus	Methicillin	Attributable	2004	1.55364	2.51681	0.590478
North Macedonia	Age-standardized	Both sexes	Deaths	Rate (per 100k)	Staphylococcus aureus	Methicillin	Attributable	2004	2.40208	3.20335	1.60082
Mali	Age-standardized	Both sexes	Deaths	Rate (per 100k)	Staphylococcus aureus	Methicillin	Attributable	2004	2.00533	2.80006	1.21061
Malta	Age-standardized	Both sexes	Deaths	Rate (per 100k)	Staphylococcus aureus	Methicillin	Attributable	2004	2.12794	2.45059	1.80529
Myanmar	Age-standardized	Both sexes	Deaths	Rate (per 100k)	Staphylococcus aureus	Methicillin	Attributable	2004	2.71223	3.52272	1.90174
Montenegro	Age-standardized	Both sexes	Deaths	Rate (per 100k)	Staphylococcus aureus	Methicillin	Attributable	2004	0.956652	1.47665	0.436652
Mongolia	Age-standardized	Both sexes	Deaths	Rate (per 100k)	Staphylococcus aureus	Methicillin	Attributable	2004	2.02812	2.88801	1.16822
Northern Mariana Islands	Age-standardized	Both sexes	Deaths	Rate (per 100k)	Staphylococcus aureus	Methicillin	Attributable	2004	1.20784	1.9337	0.481976
Mozambique	Age-standardized	Both sexes	Deaths	Rate (per 100k)	Staphylococcus aureus	Methicillin	Attributable	2004	1.08877	1.71828	0.459263
Mauritania	Age-standardized	Both sexes	Deaths	Rate (per 100k)	Staphylococcus aureus	Methicillin	Attributable	2004	0.864276	1.40172	0.326835
Mauritius	Age-standardized	Both sexes	Deaths	Rate (per 100k)	Staphylococcus aureus	Methicillin	Attributable	2004	0.946403	1.59351	0.299298
Malawi	Age-standardized	Both sexes	Deaths	Rate (per 100k)	Staphylococcus aureus	Methicillin	Attributable	2004	1.61225	2.3245	0.899991
Malaysia	Age-standardized	Both sexes	Deaths	Rate (per 100k)	Staphylococcus aureus	Methicillin	Attributable	2004	1.61081	1.89177	1.32985
Namibia	Age-standardized	Both sexes	Deaths	Rate (per 100k)	Staphylococcus aureus	Methicillin	Attributable	2004	1.10826	1.9989	0.217619
Niger	Age-standardized	Both sexes	Deaths	Rate (per 100k)	Staphylococcus aureus	Methicillin	Attributable	2004	1.23676	2.09116	0.382361
Nigeria	Age-standardized	Both sexes	Deaths	Rate (per 100k)	Staphylococcus aureus	Methicillin	Attributable	2004	1.96079	2.4646	1.45698
Nicaragua	Age-standardized	Both sexes	Deaths	Rate (per 100k)	Staphylococcus aureus	Methicillin	Attributable	2004	1.137	1.50515	0.768844
Niue	Age-standardized	Both sexes	Deaths	Rate (per 100k)	Staphylococcus aureus	Methicillin	Attributable	2004	1.49999	2.51334	0.486631
Netherlands	Age-standardized	Both sexes	Deaths	Rate (per 100k)	Staphylococcus aureus	Methicillin	Attributable	2004	0.132906	0.16404	0.101772
Norway	Age-standardized	Both sexes	Deaths	Rate (per 100k)	Staphylococcus aureus	Methicillin	Attributable	2004	0.285009	0.478999	0.0910203
Nepal	Age-standardized	Both sexes	Deaths	Rate (per 100k)	Staphylococcus aureus	Methicillin	Attributable	2004	1.31665	1.95188	0.681429
Nauru	Age-standardized	Both sexes	Deaths	Rate (per 100k)	Staphylococcus aureus	Methicillin	Attributable	2004	1.61863	2.71591	0.521349
New Zealand	Age-standardized	Both sexes	Deaths	Rate (per 100k)	Staphylococcus aureus	Methicillin	Attributable	2004	0.291669	0.353443	0.229895
Oman	Age-standardized	Both sexes	Deaths	Rate (per 100k)	Staphylococcus aureus	Methicillin	Attributable	2004	0.687445	1.15193	0.222961
Pakistan	Age-standardized	Both sexes	Deaths	Rate (per 100k)	Staphylococcus aureus	Methicillin	Attributable	2004	1.40436	1.73571	1.07301
Panama	Age-standardized	Both sexes	Deaths	Rate (per 100k)	Staphylococcus aureus	Methicillin	Attributable	2004	1.08471	1.3261	0.843324
Peru	Age-standardized	Both sexes	Deaths	Rate (per 100k)	Staphylococcus aureus	Methicillin	Attributable	2004	2.36479	2.83869	1.89089
Philippines	Age-standardized	Both sexes	Deaths	Rate (per 100k)	Staphylococcus aureus	Methicillin	Attributable	2004	2.36466	2.85241	1.87691
Palau	Age-standardized	Both sexes	Deaths	Rate (per 100k)	Staphylococcus aureus	Methicillin	Attributable	2004	1.54941	2.60094	0.497865
Papua New Guinea	Age-standardized	Both sexes	Deaths	Rate (per 100k)	Staphylococcus aureus	Methicillin	Attributable	2004	0.960696	1.64134	0.280051
Poland	Age-standardized	Both sexes	Deaths	Rate (per 100k)	Staphylococcus aureus	Methicillin	Attributable	2004	1.00669	1.22099	0.792388
Puerto Rico	Age-standardized	Both sexes	Deaths	Rate (per 100k)	Staphylococcus aureus	Methicillin	Attributable	2004	1.58974	2.46373	0.715751
Democratic People's Republic of Korea	Age-standardized	Both sexes	Deaths	Rate (per 100k)	Staphylococcus aureus	Methicillin	Attributable	2004	1.47016	2.27289	0.667423
Portugal	Age-standardized	Both sexes	Deaths	Rate (per 100k)	Staphylococcus aureus	Methicillin	Attributable	2004	2.0902	2.44732	1.73307
Paraguay	Age-standardized	Both sexes	Deaths	Rate (per 100k)	Staphylococcus aureus	Methicillin	Attributable	2004	1.27878	1.54676	1.01081
Palestine	Age-standardized	Both sexes	Deaths	Rate (per 100k)	Staphylococcus aureus	Methicillin	Attributable	2004	2.18491	3.15827	1.21155
Qatar	Age-standardized	Both sexes	Deaths	Rate (per 100k)	Staphylococcus aureus	Methicillin	Attributable	2004	3.19882	4.47042	1.92722
Romania	Age-standardized	Both sexes	Deaths	Rate (per 100k)	Staphylococcus aureus	Methicillin	Attributable	2004	2.25923	2.71967	1.7988
Russian Federation	Age-standardized	Both sexes	Deaths	Rate (per 100k)	Staphylococcus aureus	Methicillin	Attributable	2004	1.42502	2.01081	0.839228
Rwanda	Age-standardized	Both sexes	Deaths	Rate (per 100k)	Staphylococcus aureus	Methicillin	Attributable	2004	2.86348	3.99805	1.7289
Saudi Arabia	Age-standardized	Both sexes	Deaths	Rate (per 100k)	Staphylococcus aureus	Methicillin	Attributable	2004	1.39624	1.9324	0.86008
Senegal	Age-standardized	Both sexes	Deaths	Rate (per 100k)	Staphylococcus aureus	Methicillin	Attributable	2004	1.31412	1.95449	0.673745
Singapore	Age-standardized	Both sexes	Deaths	Rate (per 100k)	Staphylococcus aureus	Methicillin	Attributable	2004	0.549488	0.842537	0.25644
Solomon Islands	Age-standardized	Both sexes	Deaths	Rate (per 100k)	Staphylococcus aureus	Methicillin	Attributable	2004	1.01929	1.75958	0.278991
Sierra Leone	Age-standardized	Both sexes	Deaths	Rate (per 100k)	Staphylococcus aureus	Methicillin	Attributable	2004	1.42016	2.38397	0.456344
El Salvador	Age-standardized	Both sexes	Deaths	Rate (per 100k)	Staphylococcus aureus	Methicillin	Attributable	2004	1.69962	1.90674	1.4925
San Marino	Age-standardized	Both sexes	Deaths	Rate (per 100k)	Staphylococcus aureus	Methicillin	Attributable	2004	0.72499	1.25252	0.197456
Somalia	Age-standardized	Both sexes	Deaths	Rate (per 100k)	Staphylococcus aureus	Methicillin	Attributable	2004	2.23549	3.33151	1.13947
Serbia	Age-standardized	Both sexes	Deaths	Rate (per 100k)	Staphylococcus aureus	Methicillin	Attributable	2004	1.54538	2.17796	0.912797
South Sudan	Age-standardized	Both sexes	Deaths	Rate (per 100k)	Staphylococcus aureus	Methicillin	Attributable	2004	0.987274	1.74749	0.227059
Sao Tome and Principe	Age-standardized	Both sexes	Deaths	Rate (per 100k)	Staphylococcus aureus	Methicillin	Attributable	2004	1.222	2.14698	0.297032
Suriname	Age-standardized	Both sexes	Deaths	Rate (per 100k)	Staphylococcus aureus	Methicillin	Attributable	2004	1.03409	1.72233	0.345858
Slovakia	Age-standardized	Both sexes	Deaths	Rate (per 100k)	Staphylococcus aureus	Methicillin	Attributable	2004	1.0453	1.38964	0.700949
Slovenia	Age-standardized	Both sexes	Deaths	Rate (per 100k)	Staphylococcus aureus	Methicillin	Attributable	2004	0.716907	0.859528	0.574287
Sweden	Age-standardized	Both sexes	Deaths	Rate (per 100k)	Staphylococcus aureus	Methicillin	Attributable	2004	0.242737	0.311516	0.173957
Eswatini	Age-standardized	Both sexes	Deaths	Rate (per 100k)	Staphylococcus aureus	Methicillin	Attributable	2004	0.782007	1.33359	0.230422
Seychelles	Age-standardized	Both sexes	Deaths	Rate (per 100k)	Staphylococcus aureus	Methicillin	Attributable	2004	1.26162	2.14146	0.381783
Syrian Arab Republic	Age-standardized	Both sexes	Deaths	Rate (per 100k)	Staphylococcus aureus	Methicillin	Attributable	2004	1.64285	2.35058	0.935117
Chad	Age-standardized	Both sexes	Deaths	Rate (per 100k)	Staphylococcus aureus	Methicillin	Attributable	2004	1.33494	2.22673	0.443142
Togo	Age-standardized	Both sexes	Deaths	Rate (per 100k)	Staphylococcus aureus	Methicillin	Attributable	2004	0.805821	1.31186	0.299781
Thailand	Age-standardized	Both sexes	Deaths	Rate (per 100k)	Staphylococcus aureus	Methicillin	Attributable	2004	1.23537	1.78473	0.686004
Tajikistan	Age-standardized	Both sexes	Deaths	Rate (per 100k)	Staphylococcus aureus	Methicillin	Attributable	2004	0.980462	1.65903	0.301898
Tokelau	Age-standardized	Both sexes	Deaths	Rate (per 100k)	Staphylococcus aureus	Methicillin	Attributable	2004	1.26986	2.09492	0.444802
Turkmenistan	Age-standardized	Both sexes	Deaths	Rate (per 100k)	Staphylococcus aureus	Methicillin	Attributable	2004	1.04433	1.76327	0.325388
Timor-Leste	Age-standardized	Both sexes	Deaths	Rate (per 100k)	Staphylococcus aureus	Methicillin	Attributable	2004	0.657602	1.17549	0.139715
Tonga	Age-standardized	Both sexes	Deaths	Rate (per 100k)	Staphylococcus aureus	Methicillin	Attributable	2004	0.996643	1.7234	0.269882
Trinidad and Tobago	Age-standardized	Both sexes	Deaths	Rate (per 100k)	Staphylococcus aureus	Methicillin	Attributable	2004	1.56322	2.43785	0.688589
Tunisia	Age-standardized	Both sexes	Deaths	Rate (per 100k)	Staphylococcus aureus	Methicillin	Attributable	2004	1.11087	1.55317	0.668563
Türkiye	Age-standardized	Both sexes	Deaths	Rate (per 100k)	Staphylococcus aureus	Methicillin	Attributable	2004	1.45302	1.90801	0.998039
Tuvalu	Age-standardized	Both sexes	Deaths	Rate (per 100k)	Staphylococcus aureus	Methicillin	Attributable	2004	1.02754	1.78595	0.269127
Taiwan (Province of China)	Age-standardized	Both sexes	Deaths	Rate (per 100k)	Staphylococcus aureus	Methicillin	Attributable	2004	3.27207	3.80892	2.73522
United Republic of Tanzania	Age-standardized	Both sexes	Deaths	Rate (per 100k)	Staphylococcus aureus	Methicillin	Attributable	2004	0.162012	0.280956	0.0430687
Uganda	Age-standardized	Both sexes	Deaths	Rate (per 100k)	Staphylococcus aureus	Methicillin	Attributable	2004	1.68818	2.31161	1.06476
Ukraine	Age-standardized	Both sexes	Deaths	Rate (per 100k)	Staphylococcus aureus	Methicillin	Attributable	2004	0.909123	1.47485	0.343392
Uruguay	Age-standardized	Both sexes	Deaths	Rate (per 100k)	Staphylococcus aureus	Methicillin	Attributable	2004	2.62076	3.20911	2.03242
United States of America	Age-standardized	Both sexes	Deaths	Rate (per 100k)	Staphylococcus aureus	Methicillin	Attributable	2004	2.43284	3.01418	1.8515
Uzbekistan	Age-standardized	Both sexes	Deaths	Rate (per 100k)	Staphylococcus aureus	Methicillin	Attributable	2004	0.946174	1.59288	0.299467
Saint Vincent and the Grenadines	Age-standardized	Both sexes	Deaths	Rate (per 100k)	Staphylococcus aureus	Methicillin	Attributable	2004	1.5803	2.48347	0.677123
Venezuela (Bolivarian Republic of)	Age-standardized	Both sexes	Deaths	Rate (per 100k)	Staphylococcus aureus	Methicillin	Attributable	2004	0.853166	1.05941	0.64692
United States Virgin Islands	Age-standardized	Both sexes	Deaths	Rate (per 100k)	Staphylococcus aureus	Methicillin	Attributable	2004	1.53527	2.42813	0.642416
Viet Nam	Age-standardized	Both sexes	Deaths	Rate (per 100k)	Staphylococcus aureus	Methicillin	Attributable	2004	1.50935	2.06554	0.953157
Vanuatu	Age-standardized	Both sexes	Deaths	Rate (per 100k)	Staphylococcus aureus	Methicillin	Attributable	2004	0.901452	1.55573	0.247177
Samoa	Age-standardized	Both sexes	Deaths	Rate (per 100k)	Staphylococcus aureus	Methicillin	Attributable	2004	0.919725	1.57012	0.269332
Yemen	Age-standardized	Both sexes	Deaths	Rate (per 100k)	Staphylococcus aureus	Methicillin	Attributable	2004	1.28859	2.02871	0.548477
South Africa	Age-standardized	Both sexes	Deaths	Rate (per 100k)	Staphylococcus aureus	Methicillin	Attributable	2004	1.96107	2.38602	1.53612
Zambia	Age-standardized	Both sexes	Deaths	Rate (per 100k)	Staphylococcus aureus	Methicillin	Attributable	2004	1.58019	2.52656	0.633827
Zimbabwe	Age-standardized	Both sexes	Deaths	Rate (per 100k)	Staphylococcus aureus	Methicillin	Attributable	2004	1.45167	2.52589	0.377443
Egypt	Age-standardized	Both sexes	Deaths	Rate (per 100k)	Staphylococcus aureus	Methicillin	Attributable	2004	3.13176	3.89774	2.36578
Sudan	Age-standardized	Both sexes	Deaths	Rate (per 100k)	Staphylococcus aureus	Methicillin	Attributable	2004	0.906456	1.31807	0.494842
China	Age-standardized	Both sexes	Deaths	Rate (per 100k)	Staphylococcus aureus	Methicillin	Attributable	2004	2.56364	2.97203	2.15525
Afghanistan	Age-standardized	Both sexes	Deaths	Rate (per 100k)	Staphylococcus aureus	Methicillin	Attributable	2005	2.39494	3.32138	1.46849
Angola	Age-standardized	Both sexes	Deaths	Rate (per 100k)	Staphylococcus aureus	Methicillin	Attributable	2005	0.170767	0.288798	0.0527357
Albania	Age-standardized	Both sexes	Deaths	Rate (per 100k)	Staphylococcus aureus	Methicillin	Attributable	2005	0.934296	1.52974	0.338854
Andorra	Age-standardized	Both sexes	Deaths	Rate (per 100k)	Staphylococcus aureus	Methicillin	Attributable	2005	0.778741	1.34203	0.21545
United Arab Emirates	Age-standardized	Both sexes	Deaths	Rate (per 100k)	Staphylococcus aureus	Methicillin	Attributable	2005	1.63779	2.5207	0.754874
Argentina	Age-standardized	Both sexes	Deaths	Rate (per 100k)	Staphylococcus aureus	Methicillin	Attributable	2005	2.80498	3.25109	2.35888
Armenia	Age-standardized	Both sexes	Deaths	Rate (per 100k)	Staphylococcus aureus	Methicillin	Attributable	2005	1.14937	1.88086	0.417888
American Samoa	Age-standardized	Both sexes	Deaths	Rate (per 100k)	Staphylococcus aureus	Methicillin	Attributable	2005	1.41696	2.31003	0.523897
Antigua and Barbuda	Age-standardized	Both sexes	Deaths	Rate (per 100k)	Staphylococcus aureus	Methicillin	Attributable	2005	1.44395	2.34038	0.547509
Australia	Age-standardized	Both sexes	Deaths	Rate (per 100k)	Staphylococcus aureus	Methicillin	Attributable	2005	0.94875	1.1276	0.769903
Austria	Age-standardized	Both sexes	Deaths	Rate (per 100k)	Staphylococcus aureus	Methicillin	Attributable	2005	0.576035	0.711492	0.440578
Azerbaijan	Age-standardized	Both sexes	Deaths	Rate (per 100k)	Staphylococcus aureus	Methicillin	Attributable	2005	0.83422	1.39988	0.268563
Burundi	Age-standardized	Both sexes	Deaths	Rate (per 100k)	Staphylococcus aureus	Methicillin	Attributable	2005	1.13237	2.01194	0.252796
Belgium	Age-standardized	Both sexes	Deaths	Rate (per 100k)	Staphylococcus aureus	Methicillin	Attributable	2005	1.54765	1.85815	1.23714
Benin	Age-standardized	Both sexes	Deaths	Rate (per 100k)	Staphylococcus aureus	Methicillin	Attributable	2005	1.5438	2.17279	0.914804
Burkina Faso	Age-standardized	Both sexes	Deaths	Rate (per 100k)	Staphylococcus aureus	Methicillin	Attributable	2005	0.490492	0.826395	0.15459
Bangladesh	Age-standardized	Both sexes	Deaths	Rate (per 100k)	Staphylococcus aureus	Methicillin	Attributable	2005	1.68937	2.41575	0.963002
Bulgaria	Age-standardized	Both sexes	Deaths	Rate (per 100k)	Staphylococcus aureus	Methicillin	Attributable	2005	1.59982	1.88009	1.31955
Bahrain	Age-standardized	Both sexes	Deaths	Rate (per 100k)	Staphylococcus aureus	Methicillin	Attributable	2005	2.96414	4.34322	1.58506
Bahamas	Age-standardized	Both sexes	Deaths	Rate (per 100k)	Staphylococcus aureus	Methicillin	Attributable	2005	1.56023	2.48491	0.63555
Bosnia and Herzegovina	Age-standardized	Both sexes	Deaths	Rate (per 100k)	Staphylococcus aureus	Methicillin	Attributable	2005	0.72188	1.08539	0.358367
Belarus	Age-standardized	Both sexes	Deaths	Rate (per 100k)	Staphylococcus aureus	Methicillin	Attributable	2005	1.07222	1.54474	0.599706
Belize	Age-standardized	Both sexes	Deaths	Rate (per 100k)	Staphylococcus aureus	Methicillin	Attributable	2005	1.36417	2.19179	0.536551
Bermuda	Age-standardized	Both sexes	Deaths	Rate (per 100k)	Staphylococcus aureus	Methicillin	Attributable	2005	1.20224	1.967	0.437489
Bolivia (Plurinational State of)	Age-standardized	Both sexes	Deaths	Rate (per 100k)	Staphylococcus aureus	Methicillin	Attributable	2005	2.43393	2.98804	1.87981
Brazil	Age-standardized	Both sexes	Deaths	Rate (per 100k)	Staphylococcus aureus	Methicillin	Attributable	2005	1.48488	1.91439	1.05537
Barbados	Age-standardized	Both sexes	Deaths	Rate (per 100k)	Staphylococcus aureus	Methicillin	Attributable	2005	2.01099	3.14423	0.877745
Brunei Darussalam	Age-standardized	Both sexes	Deaths	Rate (per 100k)	Staphylococcus aureus	Methicillin	Attributable	2005	0.688493	1.12111	0.255881
Bhutan	Age-standardized	Both sexes	Deaths	Rate (per 100k)	Staphylococcus aureus	Methicillin	Attributable	2005	0.563876	0.933576	0.194176
Botswana	Age-standardized	Both sexes	Deaths	Rate (per 100k)	Staphylococcus aureus	Methicillin	Attributable	2005	1.06999	1.62932	0.510653
Central African Republic	Age-standardized	Both sexes	Deaths	Rate (per 100k)	Staphylococcus aureus	Methicillin	Attributable	2005	1.96254	2.8636	1.06148
Canada	Age-standardized	Both sexes	Deaths	Rate (per 100k)	Staphylococcus aureus	Methicillin	Attributable	2005	1.1164	1.54519	0.687599
Switzerland	Age-standardized	Both sexes	Deaths	Rate (per 100k)	Staphylococcus aureus	Methicillin	Attributable	2005	0.304647	0.428051	0.181242
Chile	Age-standardized	Both sexes	Deaths	Rate (per 100k)	Staphylococcus aureus	Methicillin	Attributable	2005	2.7252	3.31265	2.13776
Côte d'Ivoire	Age-standardized	Both sexes	Deaths	Rate (per 100k)	Staphylococcus aureus	Methicillin	Attributable	2005	1.0371	1.66086	0.413338
Cameroon	Age-standardized	Both sexes	Deaths	Rate (per 100k)	Staphylococcus aureus	Methicillin	Attributable	2005	1.59289	2.36584	0.819945
Democratic Republic of the Congo	Age-standardized	Both sexes	Deaths	Rate (per 100k)	Staphylococcus aureus	Methicillin	Attributable	2005	1.58176	2.24226	0.921265
Congo	Age-standardized	Both sexes	Deaths	Rate (per 100k)	Staphylococcus aureus	Methicillin	Attributable	2005	2.58281	3.4671	1.69852
Cook Islands	Age-standardized	Both sexes	Deaths	Rate (per 100k)	Staphylococcus aureus	Methicillin	Attributable	2005	1.39862	2.25545	0.541791
Colombia	Age-standardized	Both sexes	Deaths	Rate (per 100k)	Staphylococcus aureus	Methicillin	Attributable	2005	1.46638	1.73359	1.19917
Comoros	Age-standardized	Both sexes	Deaths	Rate (per 100k)	Staphylococcus aureus	Methicillin	Attributable	2005	1.22222	2.08943	0.355011
Cabo Verde	Age-standardized	Both sexes	Deaths	Rate (per 100k)	Staphylococcus aureus	Methicillin	Attributable	2005	0.78995	1.35318	0.226717
Costa Rica	Age-standardized	Both sexes	Deaths	Rate (per 100k)	Staphylococcus aureus	Methicillin	Attributable	2005	1.74734	2.1046	1.39009
Cuba	Age-standardized	Both sexes	Deaths	Rate (per 100k)	Staphylococcus aureus	Methicillin	Attributable	2005	1.52091	2.02197	1.01986
Cyprus	Age-standardized	Both sexes	Deaths	Rate (per 100k)	Staphylococcus aureus	Methicillin	Attributable	2005	2.35207	2.7466	1.95754
Czechia	Age-standardized	Both sexes	Deaths	Rate (per 100k)	Staphylococcus aureus	Methicillin	Attributable	2005	0.656489	0.7911	0.521878
Germany	Age-standardized	Both sexes	Deaths	Rate (per 100k)	Staphylococcus aureus	Methicillin	Attributable	2005	0.795896	0.946342	0.645451
Djibouti	Age-standardized	Both sexes	Deaths	Rate (per 100k)	Staphylococcus aureus	Methicillin	Attributable	2005	0.818026	1.46638	0.169674
Dominica	Age-standardized	Both sexes	Deaths	Rate (per 100k)	Staphylococcus aureus	Methicillin	Attributable	2005	1.82287	2.74754	0.898208
Denmark	Age-standardized	Both sexes	Deaths	Rate (per 100k)	Staphylococcus aureus	Methicillin	Attributable	2005	0.14395	0.171897	0.116004
Dominican Republic	Age-standardized	Both sexes	Deaths	Rate (per 100k)	Staphylococcus aureus	Methicillin	Attributable	2005	1.19069	1.47498	0.906392
Algeria	Age-standardized	Both sexes	Deaths	Rate (per 100k)	Staphylococcus aureus	Methicillin	Attributable	2005	1.73147	2.28831	1.17462
Ecuador	Age-standardized	Both sexes	Deaths	Rate (per 100k)	Staphylococcus aureus	Methicillin	Attributable	2005	1.59172	1.9003	1.28315
Eritrea	Age-standardized	Both sexes	Deaths	Rate (per 100k)	Staphylococcus aureus	Methicillin	Attributable	2005	0.739326	1.24791	0.230744
Spain	Age-standardized	Both sexes	Deaths	Rate (per 100k)	Staphylococcus aureus	Methicillin	Attributable	2005	1.36754	1.68884	1.04624
Estonia	Age-standardized	Both sexes	Deaths	Rate (per 100k)	Staphylococcus aureus	Methicillin	Attributable	2005	0.292448	0.369855	0.215041
Ethiopia	Age-standardized	Both sexes	Deaths	Rate (per 100k)	Staphylococcus aureus	Methicillin	Attributable	2005	1.435	2.00307	0.866932
Finland	Age-standardized	Both sexes	Deaths	Rate (per 100k)	Staphylococcus aureus	Methicillin	Attributable	2005	0.135251	0.166024	0.104479
Fiji	Age-standardized	Both sexes	Deaths	Rate (per 100k)	Staphylococcus aureus	Methicillin	Attributable	2005	1.29753	2.04717	0.547884
France	Age-standardized	Both sexes	Deaths	Rate (per 100k)	Staphylococcus aureus	Methicillin	Attributable	2005	1.50022	1.79914	1.2013
Micronesia (Federated States of)	Age-standardized	Both sexes	Deaths	Rate (per 100k)	Staphylococcus aureus	Methicillin	Attributable	2005	1.16627	1.98005	0.352479
Gabon	Age-standardized	Both sexes	Deaths	Rate (per 100k)	Staphylococcus aureus	Methicillin	Attributable	2005	1.6863	2.50524	0.867372
United Kingdom	Age-standardized	Both sexes	Deaths	Rate (per 100k)	Staphylococcus aureus	Methicillin	Attributable	2005	2.32557	2.69526	1.95588
Georgia	Age-standardized	Both sexes	Deaths	Rate (per 100k)	Staphylococcus aureus	Methicillin	Attributable	2005	0.813931	1.16858	0.459282
Ghana	Age-standardized	Both sexes	Deaths	Rate (per 100k)	Staphylococcus aureus	Methicillin	Attributable	2005	1.50561	2.15306	0.858152
Guinea	Age-standardized	Both sexes	Deaths	Rate (per 100k)	Staphylococcus aureus	Methicillin	Attributable	2005	1.56431	2.60816	0.520466
Gambia	Age-standardized	Both sexes	Deaths	Rate (per 100k)	Staphylococcus aureus	Methicillin	Attributable	2005	1.63854	2.87828	0.398804
Guinea-Bissau	Age-standardized	Both sexes	Deaths	Rate (per 100k)	Staphylococcus aureus	Methicillin	Attributable	2005	1.34799	2.36239	0.333589
Equatorial Guinea	Age-standardized	Both sexes	Deaths	Rate (per 100k)	Staphylococcus aureus	Methicillin	Attributable	2005	1.53121	2.41346	0.648963
Greece	Age-standardized	Both sexes	Deaths	Rate (per 100k)	Staphylococcus aureus	Methicillin	Attributable	2005	2.00257	2.33386	1.67127
Grenada	Age-standardized	Both sexes	Deaths	Rate (per 100k)	Staphylococcus aureus	Methicillin	Attributable	2005	2.19189	3.49348	0.890312
Greenland	Age-standardized	Both sexes	Deaths	Rate (per 100k)	Staphylococcus aureus	Methicillin	Attributable	2005	1.3635	2.26015	0.466854
Guatemala	Age-standardized	Both sexes	Deaths	Rate (per 100k)	Staphylococcus aureus	Methicillin	Attributable	2005	3.33809	3.80206	2.87412
Guam	Age-standardized	Both sexes	Deaths	Rate (per 100k)	Staphylococcus aureus	Methicillin	Attributable	2005	0.705893	1.1459	0.265882
Guyana	Age-standardized	Both sexes	Deaths	Rate (per 100k)	Staphylococcus aureus	Methicillin	Attributable	2005	1.82847	2.8378	0.819132
Honduras	Age-standardized	Both sexes	Deaths	Rate (per 100k)	Staphylococcus aureus	Methicillin	Attributable	2005	0.931195	1.22894	0.633454
Croatia	Age-standardized	Both sexes	Deaths	Rate (per 100k)	Staphylococcus aureus	Methicillin	Attributable	2005	1.6812	1.96374	1.39865
Haiti	Age-standardized	Both sexes	Deaths	Rate (per 100k)	Staphylococcus aureus	Methicillin	Attributable	2005	1.26459	1.90047	0.628709
Hungary	Age-standardized	Both sexes	Deaths	Rate (per 100k)	Staphylococcus aureus	Methicillin	Attributable	2005	1.20373	1.50581	0.901656
Indonesia	Age-standardized	Both sexes	Deaths	Rate (per 100k)	Staphylococcus aureus	Methicillin	Attributable	2005	1.2648	1.8074	0.722192
India	Age-standardized	Both sexes	Deaths	Rate (per 100k)	Staphylococcus aureus	Methicillin	Attributable	2005	1.8142	2.17243	1.45597
Ireland	Age-standardized	Both sexes	Deaths	Rate (per 100k)	Staphylococcus aureus	Methicillin	Attributable	2005	2.41791	2.81009	2.02572
Iran (Islamic Republic of)	Age-standardized	Both sexes	Deaths	Rate (per 100k)	Staphylococcus aureus	Methicillin	Attributable	2005	1.64946	2.10686	1.19206
Iraq	Age-standardized	Both sexes	Deaths	Rate (per 100k)	Staphylococcus aureus	Methicillin	Attributable	2005	2.53039	2.9953	2.06547
Iceland	Age-standardized	Both sexes	Deaths	Rate (per 100k)	Staphylococcus aureus	Methicillin	Attributable	2005	0.697099	1.22984	0.164357
Israel	Age-standardized	Both sexes	Deaths	Rate (per 100k)	Staphylococcus aureus	Methicillin	Attributable	2005	1.84798	2.54463	1.15133
Italy	Age-standardized	Both sexes	Deaths	Rate (per 100k)	Staphylococcus aureus	Methicillin	Attributable	2005	1.39521	1.67253	1.1179
Jamaica	Age-standardized	Both sexes	Deaths	Rate (per 100k)	Staphylococcus aureus	Methicillin	Attributable	2005	1.0211	1.64271	0.399495
Jordan	Age-standardized	Both sexes	Deaths	Rate (per 100k)	Staphylococcus aureus	Methicillin	Attributable	2005	2.05777	2.84533	1.27021
Japan	Age-standardized	Both sexes	Deaths	Rate (per 100k)	Staphylococcus aureus	Methicillin	Attributable	2005	1.74018	2.08863	1.39173
Kazakhstan	Age-standardized	Both sexes	Deaths	Rate (per 100k)	Staphylococcus aureus	Methicillin	Attributable	2005	1.51739	2.44917	0.585605
Kenya	Age-standardized	Both sexes	Deaths	Rate (per 100k)	Staphylococcus aureus	Methicillin	Attributable	2005	1.7969	2.30244	1.29136
Kyrgyzstan	Age-standardized	Both sexes	Deaths	Rate (per 100k)	Staphylococcus aureus	Methicillin	Attributable	2005	1.0463	1.77176	0.320843
Cambodia	Age-standardized	Both sexes	Deaths	Rate (per 100k)	Staphylococcus aureus	Methicillin	Attributable	2005	0.6175	0.937349	0.297651
Kiribati	Age-standardized	Both sexes	Deaths	Rate (per 100k)	Staphylococcus aureus	Methicillin	Attributable	2005	1.2979	2.16261	0.43319
Saint Kitts and Nevis	Age-standardized	Both sexes	Deaths	Rate (per 100k)	Staphylococcus aureus	Methicillin	Attributable	2005	1.94525	3.04581	0.8447
Republic of Korea	Age-standardized	Both sexes	Deaths	Rate (per 100k)	Staphylococcus aureus	Methicillin	Attributable	2005	1.69394	2.28844	1.09944
Kuwait	Age-standardized	Both sexes	Deaths	Rate (per 100k)	Staphylococcus aureus	Methicillin	Attributable	2005	1.82029	2.21156	1.42901
Lao People's Democratic Republic	Age-standardized	Both sexes	Deaths	Rate (per 100k)	Staphylococcus aureus	Methicillin	Attributable	2005	0.298742	0.430313	0.167172
Lebanon	Age-standardized	Both sexes	Deaths	Rate (per 100k)	Staphylococcus aureus	Methicillin	Attributable	2005	0.751981	1.2204	0.28356
Liberia	Age-standardized	Both sexes	Deaths	Rate (per 100k)	Staphylococcus aureus	Methicillin	Attributable	2005	1.01396	1.73567	0.292253
Libya	Age-standardized	Both sexes	Deaths	Rate (per 100k)	Staphylococcus aureus	Methicillin	Attributable	2005	0.902464	1.32074	0.48419
Saint Lucia	Age-standardized	Both sexes	Deaths	Rate (per 100k)	Staphylococcus aureus	Methicillin	Attributable	2005	1.64602	2.5504	0.741636
Sri Lanka	Age-standardized	Both sexes	Deaths	Rate (per 100k)	Staphylococcus aureus	Methicillin	Attributable	2005	1.42072	2.01309	0.828357
Lesotho	Age-standardized	Both sexes	Deaths	Rate (per 100k)	Staphylococcus aureus	Methicillin	Attributable	2005	0.394461	0.677602	0.111321
Lithuania	Age-standardized	Both sexes	Deaths	Rate (per 100k)	Staphylococcus aureus	Methicillin	Attributable	2005	0.455001	0.562141	0.347862
Luxembourg	Age-standardized	Both sexes	Deaths	Rate (per 100k)	Staphylococcus aureus	Methicillin	Attributable	2005	1.00256	1.19035	0.814775
Latvia	Age-standardized	Both sexes	Deaths	Rate (per 100k)	Staphylococcus aureus	Methicillin	Attributable	2005	0.919627	1.10388	0.735375
Morocco	Age-standardized	Both sexes	Deaths	Rate (per 100k)	Staphylococcus aureus	Methicillin	Attributable	2005	0.511304	0.680266	0.342342
Monaco	Age-standardized	Both sexes	Deaths	Rate (per 100k)	Staphylococcus aureus	Methicillin	Attributable	2005	0.961527	1.63419	0.288864
Republic of Moldova	Age-standardized	Both sexes	Deaths	Rate (per 100k)	Staphylococcus aureus	Methicillin	Attributable	2005	0.986715	1.60075	0.37268
Madagascar	Age-standardized	Both sexes	Deaths	Rate (per 100k)	Staphylococcus aureus	Methicillin	Attributable	2005	0.512727	0.710867	0.314587
Maldives	Age-standardized	Both sexes	Deaths	Rate (per 100k)	Staphylococcus aureus	Methicillin	Attributable	2005	0.856857	1.44468	0.269038
Mexico	Age-standardized	Both sexes	Deaths	Rate (per 100k)	Staphylococcus aureus	Methicillin	Attributable	2005	1.78956	2.18944	1.38968
Marshall Islands	Age-standardized	Both sexes	Deaths	Rate (per 100k)	Staphylococcus aureus	Methicillin	Attributable	2005	1.654	2.6483	0.659697
North Macedonia	Age-standardized	Both sexes	Deaths	Rate (per 100k)	Staphylococcus aureus	Methicillin	Attributable	2005	2.4475	3.22025	1.67474
Mali	Age-standardized	Both sexes	Deaths	Rate (per 100k)	Staphylococcus aureus	Methicillin	Attributable	2005	2.0076	2.76697	1.24824
Malta	Age-standardized	Both sexes	Deaths	Rate (per 100k)	Staphylococcus aureus	Methicillin	Attributable	2005	2.09819	2.41227	1.78411
Myanmar	Age-standardized	Both sexes	Deaths	Rate (per 100k)	Staphylococcus aureus	Methicillin	Attributable	2005	2.68952	3.45226	1.92677
Montenegro	Age-standardized	Both sexes	Deaths	Rate (per 100k)	Staphylococcus aureus	Methicillin	Attributable	2005	0.974253	1.46929	0.479211
Mongolia	Age-standardized	Both sexes	Deaths	Rate (per 100k)	Staphylococcus aureus	Methicillin	Attributable	2005	2.15062	3.00814	1.2931
Northern Mariana Islands	Age-standardized	Both sexes	Deaths	Rate (per 100k)	Staphylococcus aureus	Methicillin	Attributable	2005	1.23312	1.95997	0.506279
Mozambique	Age-standardized	Both sexes	Deaths	Rate (per 100k)	Staphylococcus aureus	Methicillin	Attributable	2005	1.1586	1.77746	0.539732
Mauritania	Age-standardized	Both sexes	Deaths	Rate (per 100k)	Staphylococcus aureus	Methicillin	Attributable	2005	0.981099	1.56594	0.396259
Mauritius	Age-standardized	Both sexes	Deaths	Rate (per 100k)	Staphylococcus aureus	Methicillin	Attributable	2005	1.09318	1.80076	0.385596
Malawi	Age-standardized	Both sexes	Deaths	Rate (per 100k)	Staphylococcus aureus	Methicillin	Attributable	2005	1.626	2.29327	0.958723
Malaysia	Age-standardized	Both sexes	Deaths	Rate (per 100k)	Staphylococcus aureus	Methicillin	Attributable	2005	1.54166	1.81537	1.26795
Namibia	Age-standardized	Both sexes	Deaths	Rate (per 100k)	Staphylococcus aureus	Methicillin	Attributable	2005	1.10497	1.97589	0.234047
Niger	Age-standardized	Both sexes	Deaths	Rate (per 100k)	Staphylococcus aureus	Methicillin	Attributable	2005	1.23283	2.08093	0.384731
Nigeria	Age-standardized	Both sexes	Deaths	Rate (per 100k)	Staphylococcus aureus	Methicillin	Attributable	2005	1.85958	2.36613	1.35302
Nicaragua	Age-standardized	Both sexes	Deaths	Rate (per 100k)	Staphylococcus aureus	Methicillin	Attributable	2005	1.24219	1.61669	0.867699
Niue	Age-standardized	Both sexes	Deaths	Rate (per 100k)	Staphylococcus aureus	Methicillin	Attributable	2005	1.36142	2.29749	0.425354
Netherlands	Age-standardized	Both sexes	Deaths	Rate (per 100k)	Staphylococcus aureus	Methicillin	Attributable	2005	0.142381	0.173078	0.111685
Norway	Age-standardized	Both sexes	Deaths	Rate (per 100k)	Staphylococcus aureus	Methicillin	Attributable	2005	0.283847	0.475357	0.0923364
Nepal	Age-standardized	Both sexes	Deaths	Rate (per 100k)	Staphylococcus aureus	Methicillin	Attributable	2005	1.16837	1.76132	0.575414
Nauru	Age-standardized	Both sexes	Deaths	Rate (per 100k)	Staphylococcus aureus	Methicillin	Attributable	2005	1.64312	2.73646	0.549784
New Zealand	Age-standardized	Both sexes	Deaths	Rate (per 100k)	Staphylococcus aureus	Methicillin	Attributable	2005	0.293804	0.355561	0.232048
Oman	Age-standardized	Both sexes	Deaths	Rate (per 100k)	Staphylococcus aureus	Methicillin	Attributable	2005	0.729352	1.20333	0.25537
Pakistan	Age-standardized	Both sexes	Deaths	Rate (per 100k)	Staphylococcus aureus	Methicillin	Attributable	2005	1.44349	1.75935	1.12764
Panama	Age-standardized	Both sexes	Deaths	Rate (per 100k)	Staphylococcus aureus	Methicillin	Attributable	2005	1.12212	1.34627	0.897974
Peru	Age-standardized	Both sexes	Deaths	Rate (per 100k)	Staphylococcus aureus	Methicillin	Attributable	2005	2.35397	2.77934	1.92859
Philippines	Age-standardized	Both sexes	Deaths	Rate (per 100k)	Staphylococcus aureus	Methicillin	Attributable	2005	2.46357	2.93301	1.99414
Palau	Age-standardized	Both sexes	Deaths	Rate (per 100k)	Staphylococcus aureus	Methicillin	Attributable	2005	1.87239	3.04791	0.696868
Papua New Guinea	Age-standardized	Both sexes	Deaths	Rate (per 100k)	Staphylococcus aureus	Methicillin	Attributable	2005	1.00255	1.70074	0.304352
Poland	Age-standardized	Both sexes	Deaths	Rate (per 100k)	Staphylococcus aureus	Methicillin	Attributable	2005	0.990339	1.20072	0.779953
Puerto Rico	Age-standardized	Both sexes	Deaths	Rate (per 100k)	Staphylococcus aureus	Methicillin	Attributable	2005	1.5787	2.45229	0.705119
Democratic People's Republic of Korea	Age-standardized	Both sexes	Deaths	Rate (per 100k)	Staphylococcus aureus	Methicillin	Attributable	2005	1.64708	2.47623	0.817926
Portugal	Age-standardized	Both sexes	Deaths	Rate (per 100k)	Staphylococcus aureus	Methicillin	Attributable	2005	2.15984	2.5126	1.80708
Paraguay	Age-standardized	Both sexes	Deaths	Rate (per 100k)	Staphylococcus aureus	Methicillin	Attributable	2005	1.45528	1.72836	1.18219
Palestine	Age-standardized	Both sexes	Deaths	Rate (per 100k)	Staphylococcus aureus	Methicillin	Attributable	2005	2.41278	3.32109	1.50448
Qatar	Age-standardized	Both sexes	Deaths	Rate (per 100k)	Staphylococcus aureus	Methicillin	Attributable	2005	3.39905	4.65417	2.14393
Romania	Age-standardized	Both sexes	Deaths	Rate (per 100k)	Staphylococcus aureus	Methicillin	Attributable	2005	2.31875	2.74913	1.88837
Russian Federation	Age-standardized	Both sexes	Deaths	Rate (per 100k)	Staphylococcus aureus	Methicillin	Attributable	2005	1.61479	2.21849	1.0111
Rwanda	Age-standardized	Both sexes	Deaths	Rate (per 100k)	Staphylococcus aureus	Methicillin	Attributable	2005	3.10255	4.1912	2.01389
Saudi Arabia	Age-standardized	Both sexes	Deaths	Rate (per 100k)	Staphylococcus aureus	Methicillin	Attributable	2005	1.44642	1.97356	0.919284
Senegal	Age-standardized	Both sexes	Deaths	Rate (per 100k)	Staphylococcus aureus	Methicillin	Attributable	2005	1.30306	1.94662	0.659501
Singapore	Age-standardized	Both sexes	Deaths	Rate (per 100k)	Staphylococcus aureus	Methicillin	Attributable	2005	0.548143	0.831696	0.264591
Solomon Islands	Age-standardized	Both sexes	Deaths	Rate (per 100k)	Staphylococcus aureus	Methicillin	Attributable	2005	1.03737	1.7815	0.293232
Sierra Leone	Age-standardized	Both sexes	Deaths	Rate (per 100k)	Staphylococcus aureus	Methicillin	Attributable	2005	1.52282	2.51253	0.533107
El Salvador	Age-standardized	Both sexes	Deaths	Rate (per 100k)	Staphylococcus aureus	Methicillin	Attributable	2005	1.68788	1.90346	1.47231
San Marino	Age-standardized	Both sexes	Deaths	Rate (per 100k)	Staphylococcus aureus	Methicillin	Attributable	2005	0.767682	1.30735	0.22801
Somalia	Age-standardized	Both sexes	Deaths	Rate (per 100k)	Staphylococcus aureus	Methicillin	Attributable	2005	2.49608	3.56003	1.43213
Serbia	Age-standardized	Both sexes	Deaths	Rate (per 100k)	Staphylococcus aureus	Methicillin	Attributable	2005	1.7199	2.34428	1.09552
South Sudan	Age-standardized	Both sexes	Deaths	Rate (per 100k)	Staphylococcus aureus	Methicillin	Attributable	2005	0.965269	1.70356	0.226975
Sao Tome and Principe	Age-standardized	Both sexes	Deaths	Rate (per 100k)	Staphylococcus aureus	Methicillin	Attributable	2005	1.2572	2.18839	0.326004
Suriname	Age-standardized	Both sexes	Deaths	Rate (per 100k)	Staphylococcus aureus	Methicillin	Attributable	2005	1.13959	1.86639	0.412789
Slovakia	Age-standardized	Both sexes	Deaths	Rate (per 100k)	Staphylococcus aureus	Methicillin	Attributable	2005	1.16949	1.52392	0.81506
Slovenia	Age-standardized	Both sexes	Deaths	Rate (per 100k)	Staphylococcus aureus	Methicillin	Attributable	2005	0.710478	0.856413	0.564544
Sweden	Age-standardized	Both sexes	Deaths	Rate (per 100k)	Staphylococcus aureus	Methicillin	Attributable	2005	0.266244	0.335061	0.197428
Eswatini	Age-standardized	Both sexes	Deaths	Rate (per 100k)	Staphylococcus aureus	Methicillin	Attributable	2005	0.786773	1.32657	0.246974
Seychelles	Age-standardized	Both sexes	Deaths	Rate (per 100k)	Staphylococcus aureus	Methicillin	Attributable	2005	1.32908	2.23312	0.425045
Syrian Arab Republic	Age-standardized	Both sexes	Deaths	Rate (per 100k)	Staphylococcus aureus	Methicillin	Attributable	2005	1.7381	2.42921	1.04699
Chad	Age-standardized	Both sexes	Deaths	Rate (per 100k)	Staphylococcus aureus	Methicillin	Attributable	2005	1.35618	2.24325	0.469107
Togo	Age-standardized	Both sexes	Deaths	Rate (per 100k)	Staphylococcus aureus	Methicillin	Attributable	2005	0.829172	1.3374	0.32094
Thailand	Age-standardized	Both sexes	Deaths	Rate (per 100k)	Staphylococcus aureus	Methicillin	Attributable	2005	1.225	1.74506	0.704943
Tajikistan	Age-standardized	Both sexes	Deaths	Rate (per 100k)	Staphylococcus aureus	Methicillin	Attributable	2005	1.01866	1.71548	0.32184
Tokelau	Age-standardized	Both sexes	Deaths	Rate (per 100k)	Staphylococcus aureus	Methicillin	Attributable	2005	1.25873	2.06481	0.452649
Turkmenistan	Age-standardized	Both sexes	Deaths	Rate (per 100k)	Staphylococcus aureus	Methicillin	Attributable	2005	1.10548	1.84818	0.362786
Timor-Leste	Age-standardized	Both sexes	Deaths	Rate (per 100k)	Staphylococcus aureus	Methicillin	Attributable	2005	0.675205	1.19206	0.158353
Tonga	Age-standardized	Both sexes	Deaths	Rate (per 100k)	Staphylococcus aureus	Methicillin	Attributable	2005	0.954352	1.65615	0.252554
Trinidad and Tobago	Age-standardized	Both sexes	Deaths	Rate (per 100k)	Staphylococcus aureus	Methicillin	Attributable	2005	1.56523	2.43105	0.699398
Tunisia	Age-standardized	Both sexes	Deaths	Rate (per 100k)	Staphylococcus aureus	Methicillin	Attributable	2005	1.14832	1.59956	0.697073
Türkiye	Age-standardized	Both sexes	Deaths	Rate (per 100k)	Staphylococcus aureus	Methicillin	Attributable	2005	1.47596	1.90054	1.05138
Tuvalu	Age-standardized	Both sexes	Deaths	Rate (per 100k)	Staphylococcus aureus	Methicillin	Attributable	2005	1.08626	1.86612	0.306408
Taiwan (Province of China)	Age-standardized	Both sexes	Deaths	Rate (per 100k)	Staphylococcus aureus	Methicillin	Attributable	2005	3.32745	3.85722	2.79767
United Republic of Tanzania	Age-standardized	Both sexes	Deaths	Rate (per 100k)	Staphylococcus aureus	Methicillin	Attributable	2005	0.170929	0.295567	0.0462903
Uganda	Age-standardized	Both sexes	Deaths	Rate (per 100k)	Staphylococcus aureus	Methicillin	Attributable	2005	1.73143	2.3116	1.15126
Ukraine	Age-standardized	Both sexes	Deaths	Rate (per 100k)	Staphylococcus aureus	Methicillin	Attributable	2005	0.737318	1.20264	0.271992
Uruguay	Age-standardized	Both sexes	Deaths	Rate (per 100k)	Staphylococcus aureus	Methicillin	Attributable	2005	2.61065	3.17999	2.04132
United States of America	Age-standardized	Both sexes	Deaths	Rate (per 100k)	Staphylococcus aureus	Methicillin	Attributable	2005	2.57858	3.13245	2.02472
Uzbekistan	Age-standardized	Both sexes	Deaths	Rate (per 100k)	Staphylococcus aureus	Methicillin	Attributable	2005	0.979053	1.63665	0.321454
Saint Vincent and the Grenadines	Age-standardized	Both sexes	Deaths	Rate (per 100k)	Staphylococcus aureus	Methicillin	Attributable	2005	1.61881	2.51536	0.722264
Venezuela (Bolivarian Republic of)	Age-standardized	Both sexes	Deaths	Rate (per 100k)	Staphylococcus aureus	Methicillin	Attributable	2005	0.959423	1.17577	0.743078
United States Virgin Islands	Age-standardized	Both sexes	Deaths	Rate (per 100k)	Staphylococcus aureus	Methicillin	Attributable	2005	1.52233	2.39211	0.652544
Viet Nam	Age-standardized	Both sexes	Deaths	Rate (per 100k)	Staphylococcus aureus	Methicillin	Attributable	2005	1.54184	2.06782	1.01586
Vanuatu	Age-standardized	Both sexes	Deaths	Rate (per 100k)	Staphylococcus aureus	Methicillin	Attributable	2005	0.91759	1.57138	0.263796
Samoa	Age-standardized	Both sexes	Deaths	Rate (per 100k)	Staphylococcus aureus	Methicillin	Attributable	2005	0.98172	1.65634	0.307102
Yemen	Age-standardized	Both sexes	Deaths	Rate (per 100k)	Staphylococcus aureus	Methicillin	Attributable	2005	1.41502	2.1721	0.657938
South Africa	Age-standardized	Both sexes	Deaths	Rate (per 100k)	Staphylococcus aureus	Methicillin	Attributable	2005	2.06834	2.48102	1.65567
Zambia	Age-standardized	Both sexes	Deaths	Rate (per 100k)	Staphylococcus aureus	Methicillin	Attributable	2005	1.64114	2.56978	0.712507
Zimbabwe	Age-standardized	Both sexes	Deaths	Rate (per 100k)	Staphylococcus aureus	Methicillin	Attributable	2005	1.43923	2.48114	0.397326
Egypt	Age-standardized	Both sexes	Deaths	Rate (per 100k)	Staphylococcus aureus	Methicillin	Attributable	2005	3.03899	3.75141	2.32656
Sudan	Age-standardized	Both sexes	Deaths	Rate (per 100k)	Staphylococcus aureus	Methicillin	Attributable	2005	0.863166	1.22965	0.496679
China	Age-standardized	Both sexes	Deaths	Rate (per 100k)	Staphylococcus aureus	Methicillin	Attributable	2005	2.53029	2.92006	2.14052
Afghanistan	Age-standardized	Both sexes	Deaths	Rate (per 100k)	Staphylococcus aureus	Methicillin	Attributable	2006	2.46203	3.37879	1.54528
Angola	Age-standardized	Both sexes	Deaths	Rate (per 100k)	Staphylococcus aureus	Methicillin	Attributable	2006	0.165109	0.27768	0.0525381
Albania	Age-standardized	Both sexes	Deaths	Rate (per 100k)	Staphylococcus aureus	Methicillin	Attributable	2006	0.856759	1.40461	0.308907
Andorra	Age-standardized	Both sexes	Deaths	Rate (per 100k)	Staphylococcus aureus	Methicillin	Attributable	2006	0.776163	1.3336	0.218724
United Arab Emirates	Age-standardized	Both sexes	Deaths	Rate (per 100k)	Staphylococcus aureus	Methicillin	Attributable	2006	1.96403	2.9616	0.966454
Argentina	Age-standardized	Both sexes	Deaths	Rate (per 100k)	Staphylococcus aureus	Methicillin	Attributable	2006	2.9545	3.41019	2.49881
Armenia	Age-standardized	Both sexes	Deaths	Rate (per 100k)	Staphylococcus aureus	Methicillin	Attributable	2006	1.17595	1.92576	0.426145
American Samoa	Age-standardized	Both sexes	Deaths	Rate (per 100k)	Staphylococcus aureus	Methicillin	Attributable	2006	1.47694	2.39355	0.560336
Antigua and Barbuda	Age-standardized	Both sexes	Deaths	Rate (per 100k)	Staphylococcus aureus	Methicillin	Attributable	2006	1.51779	2.44406	0.591514
Australia	Age-standardized	Both sexes	Deaths	Rate (per 100k)	Staphylococcus aureus	Methicillin	Attributable	2006	1.0409	1.22433	0.857461
Austria	Age-standardized	Both sexes	Deaths	Rate (per 100k)	Staphylococcus aureus	Methicillin	Attributable	2006	0.621429	0.764926	0.477933
Azerbaijan	Age-standardized	Both sexes	Deaths	Rate (per 100k)	Staphylococcus aureus	Methicillin	Attributable	2006	0.810049	1.35593	0.264164
Burundi	Age-standardized	Both sexes	Deaths	Rate (per 100k)	Staphylococcus aureus	Methicillin	Attributable	2006	1.06988	1.9036	0.236153
Belgium	Age-standardized	Both sexes	Deaths	Rate (per 100k)	Staphylococcus aureus	Methicillin	Attributable	2006	1.5382	1.84989	1.2265
Benin	Age-standardized	Both sexes	Deaths	Rate (per 100k)	Staphylococcus aureus	Methicillin	Attributable	2006	1.86255	2.52425	1.20085
Burkina Faso	Age-standardized	Both sexes	Deaths	Rate (per 100k)	Staphylococcus aureus	Methicillin	Attributable	2006	0.52895	0.886119	0.171782
Bangladesh	Age-standardized	Both sexes	Deaths	Rate (per 100k)	Staphylococcus aureus	Methicillin	Attributable	2006	1.59962	2.29957	0.899681
Bulgaria	Age-standardized	Both sexes	Deaths	Rate (per 100k)	Staphylococcus aureus	Methicillin	Attributable	2006	1.45609	1.70159	1.21059
Bahrain	Age-standardized	Both sexes	Deaths	Rate (per 100k)	Staphylococcus aureus	Methicillin	Attributable	2006	3.08813	4.46445	1.7118
Bahamas	Age-standardized	Both sexes	Deaths	Rate (per 100k)	Staphylococcus aureus	Methicillin	Attributable	2006	1.63485	2.59188	0.677821
Bosnia and Herzegovina	Age-standardized	Both sexes	Deaths	Rate (per 100k)	Staphylococcus aureus	Methicillin	Attributable	2006	0.734077	1.08509	0.383067
Belarus	Age-standardized	Both sexes	Deaths	Rate (per 100k)	Staphylococcus aureus	Methicillin	Attributable	2006	1.13621	1.59858	0.673851
Belize	Age-standardized	Both sexes	Deaths	Rate (per 100k)	Staphylococcus aureus	Methicillin	Attributable	2006	1.38936	2.23651	0.542215
Bermuda	Age-standardized	Both sexes	Deaths	Rate (per 100k)	Staphylococcus aureus	Methicillin	Attributable	2006	1.19963	1.95221	0.447053
Bolivia (Plurinational State of)	Age-standardized	Both sexes	Deaths	Rate (per 100k)	Staphylococcus aureus	Methicillin	Attributable	2006	2.64407	3.21435	2.07379
Brazil	Age-standardized	Both sexes	Deaths	Rate (per 100k)	Staphylococcus aureus	Methicillin	Attributable	2006	1.52894	1.95265	1.10522
Barbados	Age-standardized	Both sexes	Deaths	Rate (per 100k)	Staphylococcus aureus	Methicillin	Attributable	2006	2.0969	3.25851	0.935298
Brunei Darussalam	Age-standardized	Both sexes	Deaths	Rate (per 100k)	Staphylococcus aureus	Methicillin	Attributable	2006	0.710942	1.15087	0.271013
Bhutan	Age-standardized	Both sexes	Deaths	Rate (per 100k)	Staphylococcus aureus	Methicillin	Attributable	2006	0.620692	1.02096	0.220422
Botswana	Age-standardized	Both sexes	Deaths	Rate (per 100k)	Staphylococcus aureus	Methicillin	Attributable	2006	0.980744	1.48733	0.47416
Central African Republic	Age-standardized	Both sexes	Deaths	Rate (per 100k)	Staphylococcus aureus	Methicillin	Attributable	2006	2.05587	2.95654	1.15519
Canada	Age-standardized	Both sexes	Deaths	Rate (per 100k)	Staphylococcus aureus	Methicillin	Attributable	2006	1.0819	1.48302	0.680788
Switzerland	Age-standardized	Both sexes	Deaths	Rate (per 100k)	Staphylococcus aureus	Methicillin	Attributable	2006	0.293395	0.403986	0.182803
Chile	Age-standardized	Both sexes	Deaths	Rate (per 100k)	Staphylococcus aureus	Methicillin	Attributable	2006	2.74476	3.31588	2.17364
Côte d'Ivoire	Age-standardized	Both sexes	Deaths	Rate (per 100k)	Staphylococcus aureus	Methicillin	Attributable	2006	1.06882	1.70255	0.435098
Cameroon	Age-standardized	Both sexes	Deaths	Rate (per 100k)	Staphylococcus aureus	Methicillin	Attributable	2006	1.70925	2.5005	0.917992
Democratic Republic of the Congo	Age-standardized	Both sexes	Deaths	Rate (per 100k)	Staphylococcus aureus	Methicillin	Attributable	2006	1.81327	2.50308	1.12347
Congo	Age-standardized	Both sexes	Deaths	Rate (per 100k)	Staphylococcus aureus	Methicillin	Attributable	2006	2.49901	3.38343	1.61459
Cook Islands	Age-standardized	Both sexes	Deaths	Rate (per 100k)	Staphylococcus aureus	Methicillin	Attributable	2006	1.40779	2.26431	0.551272
Colombia	Age-standardized	Both sexes	Deaths	Rate (per 100k)	Staphylococcus aureus	Methicillin	Attributable	2006	1.44249	1.70475	1.18024
Comoros	Age-standardized	Both sexes	Deaths	Rate (per 100k)	Staphylococcus aureus	Methicillin	Attributable	2006	1.23068	2.10365	0.357704
Cabo Verde	Age-standardized	Both sexes	Deaths	Rate (per 100k)	Staphylococcus aureus	Methicillin	Attributable	2006	0.749857	1.28554	0.214172
Costa Rica	Age-standardized	Both sexes	Deaths	Rate (per 100k)	Staphylococcus aureus	Methicillin	Attributable	2006	1.78244	2.1624	1.40248
Cuba	Age-standardized	Both sexes	Deaths	Rate (per 100k)	Staphylococcus aureus	Methicillin	Attributable	2006	1.47208	1.94583	0.998334
Cyprus	Age-standardized	Both sexes	Deaths	Rate (per 100k)	Staphylococcus aureus	Methicillin	Attributable	2006	2.32336	2.70506	1.94165
Czechia	Age-standardized	Both sexes	Deaths	Rate (per 100k)	Staphylococcus aureus	Methicillin	Attributable	2006	0.646702	0.772362	0.521042
Germany	Age-standardized	Both sexes	Deaths	Rate (per 100k)	Staphylococcus aureus	Methicillin	Attributable	2006	0.808335	0.956885	0.659785
Djibouti	Age-standardized	Both sexes	Deaths	Rate (per 100k)	Staphylococcus aureus	Methicillin	Attributable	2006	0.855181	1.53075	0.179615
Dominica	Age-standardized	Both sexes	Deaths	Rate (per 100k)	Staphylococcus aureus	Methicillin	Attributable	2006	1.82169	2.73791	0.905472
Denmark	Age-standardized	Both sexes	Deaths	Rate (per 100k)	Staphylococcus aureus	Methicillin	Attributable	2006	0.146758	0.174643	0.118873
Dominican Republic	Age-standardized	Both sexes	Deaths	Rate (per 100k)	Staphylococcus aureus	Methicillin	Attributable	2006	1.24212	1.53682	0.947413
Algeria	Age-standardized	Both sexes	Deaths	Rate (per 100k)	Staphylococcus aureus	Methicillin	Attributable	2006	1.74957	2.28557	1.21358
Ecuador	Age-standardized	Both sexes	Deaths	Rate (per 100k)	Staphylococcus aureus	Methicillin	Attributable	2006	1.66018	1.97302	1.34733
Eritrea	Age-standardized	Both sexes	Deaths	Rate (per 100k)	Staphylococcus aureus	Methicillin	Attributable	2006	0.658721	1.09451	0.22293
Spain	Age-standardized	Both sexes	Deaths	Rate (per 100k)	Staphylococcus aureus	Methicillin	Attributable	2006	1.38813	1.69935	1.07691
Estonia	Age-standardized	Both sexes	Deaths	Rate (per 100k)	Staphylococcus aureus	Methicillin	Attributable	2006	0.29879	0.375608	0.221973
Ethiopia	Age-standardized	Both sexes	Deaths	Rate (per 100k)	Staphylococcus aureus	Methicillin	Attributable	2006	1.67965	2.26562	1.09368
Finland	Age-standardized	Both sexes	Deaths	Rate (per 100k)	Staphylococcus aureus	Methicillin	Attributable	2006	0.128479	0.155734	0.101223
Fiji	Age-standardized	Both sexes	Deaths	Rate (per 100k)	Staphylococcus aureus	Methicillin	Attributable	2006	1.54191	2.3603	0.723519
France	Age-standardized	Both sexes	Deaths	Rate (per 100k)	Staphylococcus aureus	Methicillin	Attributable	2006	1.50654	1.80219	1.21088
Micronesia (Federated States of)	Age-standardized	Both sexes	Deaths	Rate (per 100k)	Staphylococcus aureus	Methicillin	Attributable	2006	1.19451	2.03222	0.356809
Gabon	Age-standardized	Both sexes	Deaths	Rate (per 100k)	Staphylococcus aureus	Methicillin	Attributable	2006	1.65748	2.45383	0.861127
United Kingdom	Age-standardized	Both sexes	Deaths	Rate (per 100k)	Staphylococcus aureus	Methicillin	Attributable	2006	2.18437	2.54336	1.82538
Georgia	Age-standardized	Both sexes	Deaths	Rate (per 100k)	Staphylococcus aureus	Methicillin	Attributable	2006	0.734918	1.05771	0.412129
Ghana	Age-standardized	Both sexes	Deaths	Rate (per 100k)	Staphylococcus aureus	Methicillin	Attributable	2006	1.69606	2.34341	1.0487
Guinea	Age-standardized	Both sexes	Deaths	Rate (per 100k)	Staphylococcus aureus	Methicillin	Attributable	2006	1.57007	2.60768	0.53245
Gambia	Age-standardized	Both sexes	Deaths	Rate (per 100k)	Staphylococcus aureus	Methicillin	Attributable	2006	1.61807	2.83475	0.401389
Guinea-Bissau	Age-standardized	Both sexes	Deaths	Rate (per 100k)	Staphylococcus aureus	Methicillin	Attributable	2006	1.41103	2.44472	0.37734
Equatorial Guinea	Age-standardized	Both sexes	Deaths	Rate (per 100k)	Staphylococcus aureus	Methicillin	Attributable	2006	1.537	2.41666	0.657326
Greece	Age-standardized	Both sexes	Deaths	Rate (per 100k)	Staphylococcus aureus	Methicillin	Attributable	2006	2.0375	2.35039	1.72461
Grenada	Age-standardized	Both sexes	Deaths	Rate (per 100k)	Staphylococcus aureus	Methicillin	Attributable	2006	2.1308	3.41199	0.849622
Greenland	Age-standardized	Both sexes	Deaths	Rate (per 100k)	Staphylococcus aureus	Methicillin	Attributable	2006	1.39626	2.30684	0.485687
Guatemala	Age-standardized	Both sexes	Deaths	Rate (per 100k)	Staphylococcus aureus	Methicillin	Attributable	2006	3.25065	3.7166	2.78469
Guam	Age-standardized	Both sexes	Deaths	Rate (per 100k)	Staphylococcus aureus	Methicillin	Attributable	2006	0.66814	1.08654	0.249744
Guyana	Age-standardized	Both sexes	Deaths	Rate (per 100k)	Staphylococcus aureus	Methicillin	Attributable	2006	1.72355	2.69748	0.74962
Honduras	Age-standardized	Both sexes	Deaths	Rate (per 100k)	Staphylococcus aureus	Methicillin	Attributable	2006	1.01486	1.31415	0.715566
Croatia	Age-standardized	Both sexes	Deaths	Rate (per 100k)	Staphylococcus aureus	Methicillin	Attributable	2006	1.6348	1.89802	1.37158
Haiti	Age-standardized	Both sexes	Deaths	Rate (per 100k)	Staphylococcus aureus	Methicillin	Attributable	2006	1.24009	1.85349	0.626677
Hungary	Age-standardized	Both sexes	Deaths	Rate (per 100k)	Staphylococcus aureus	Methicillin	Attributable	2006	1.26297	1.55927	0.966684
Indonesia	Age-standardized	Both sexes	Deaths	Rate (per 100k)	Staphylococcus aureus	Methicillin	Attributable	2006	1.28113	1.8037	0.758558
India	Age-standardized	Both sexes	Deaths	Rate (per 100k)	Staphylococcus aureus	Methicillin	Attributable	2006	1.84017	2.19512	1.48522
Ireland	Age-standardized	Both sexes	Deaths	Rate (per 100k)	Staphylococcus aureus	Methicillin	Attributable	2006	2.44374	2.82678	2.0607
Iran (Islamic Republic of)	Age-standardized	Both sexes	Deaths	Rate (per 100k)	Staphylococcus aureus	Methicillin	Attributable	2006	1.58269	2.04631	1.11907
Iraq	Age-standardized	Both sexes	Deaths	Rate (per 100k)	Staphylococcus aureus	Methicillin	Attributable	2006	2.64032	3.07498	2.20567
Iceland	Age-standardized	Both sexes	Deaths	Rate (per 100k)	Staphylococcus aureus	Methicillin	Attributable	2006	0.668702	1.17659	0.160816
Israel	Age-standardized	Both sexes	Deaths	Rate (per 100k)	Staphylococcus aureus	Methicillin	Attributable	2006	1.91365	2.61012	1.21717
Italy	Age-standardized	Both sexes	Deaths	Rate (per 100k)	Staphylococcus aureus	Methicillin	Attributable	2006	1.37483	1.64108	1.10858
Jamaica	Age-standardized	Both sexes	Deaths	Rate (per 100k)	Staphylococcus aureus	Methicillin	Attributable	2006	0.974452	1.58835	0.360552
Jordan	Age-standardized	Both sexes	Deaths	Rate (per 100k)	Staphylococcus aureus	Methicillin	Attributable	2006	2.23617	3.0078	1.46454
Japan	Age-standardized	Both sexes	Deaths	Rate (per 100k)	Staphylococcus aureus	Methicillin	Attributable	2006	1.71718	2.03327	1.40109
Kazakhstan	Age-standardized	Both sexes	Deaths	Rate (per 100k)	Staphylococcus aureus	Methicillin	Attributable	2006	1.55413	2.49829	0.609972
Kenya	Age-standardized	Both sexes	Deaths	Rate (per 100k)	Staphylococcus aureus	Methicillin	Attributable	2006	1.66421	2.11863	1.20978
Kyrgyzstan	Age-standardized	Both sexes	Deaths	Rate (per 100k)	Staphylococcus aureus	Methicillin	Attributable	2006	1.04622	1.77379	0.318649
Cambodia	Age-standardized	Both sexes	Deaths	Rate (per 100k)	Staphylococcus aureus	Methicillin	Attributable	2006	0.643626	0.963109	0.324144
Kiribati	Age-standardized	Both sexes	Deaths	Rate (per 100k)	Staphylococcus aureus	Methicillin	Attributable	2006	1.37987	2.27316	0.486582
Saint Kitts and Nevis	Age-standardized	Both sexes	Deaths	Rate (per 100k)	Staphylococcus aureus	Methicillin	Attributable	2006	1.95853	3.06548	0.851572
Republic of Korea	Age-standardized	Both sexes	Deaths	Rate (per 100k)	Staphylococcus aureus	Methicillin	Attributable	2006	1.68685	2.2501	1.1236
Kuwait	Age-standardized	Both sexes	Deaths	Rate (per 100k)	Staphylococcus aureus	Methicillin	Attributable	2006	1.88402	2.27808	1.48996
Lao People's Democratic Republic	Age-standardized	Both sexes	Deaths	Rate (per 100k)	Staphylococcus aureus	Methicillin	Attributable	2006	0.301019	0.430813	0.171224
Lebanon	Age-standardized	Both sexes	Deaths	Rate (per 100k)	Staphylococcus aureus	Methicillin	Attributable	2006	0.921828	1.4846	0.359059
Liberia	Age-standardized	Both sexes	Deaths	Rate (per 100k)	Staphylococcus aureus	Methicillin	Attributable	2006	1.00404	1.70666	0.301418
Libya	Age-standardized	Both sexes	Deaths	Rate (per 100k)	Staphylococcus aureus	Methicillin	Attributable	2006	0.950274	1.37389	0.526655
Saint Lucia	Age-standardized	Both sexes	Deaths	Rate (per 100k)	Staphylococcus aureus	Methicillin	Attributable	2006	1.56842	2.44343	0.693413
Sri Lanka	Age-standardized	Both sexes	Deaths	Rate (per 100k)	Staphylococcus aureus	Methicillin	Attributable	2006	1.70358	2.31563	1.09152
Lesotho	Age-standardized	Both sexes	Deaths	Rate (per 100k)	Staphylococcus aureus	Methicillin	Attributable	2006	0.414821	0.711354	0.118288
Lithuania	Age-standardized	Both sexes	Deaths	Rate (per 100k)	Staphylococcus aureus	Methicillin	Attributable	2006	0.466297	0.567965	0.364629
Luxembourg	Age-standardized	Both sexes	Deaths	Rate (per 100k)	Staphylococcus aureus	Methicillin	Attributable	2006	1.01666	1.19965	0.833666
Latvia	Age-standardized	Both sexes	Deaths	Rate (per 100k)	Staphylococcus aureus	Methicillin	Attributable	2006	0.927497	1.10124	0.753757
Morocco	Age-standardized	Both sexes	Deaths	Rate (per 100k)	Staphylococcus aureus	Methicillin	Attributable	2006	0.54789	0.720767	0.375013
Monaco	Age-standardized	Both sexes	Deaths	Rate (per 100k)	Staphylococcus aureus	Methicillin	Attributable	2006	0.967667	1.64225	0.293088
Republic of Moldova	Age-standardized	Both sexes	Deaths	Rate (per 100k)	Staphylococcus aureus	Methicillin	Attributable	2006	0.957614	1.54562	0.369605
Madagascar	Age-standardized	Both sexes	Deaths	Rate (per 100k)	Staphylococcus aureus	Methicillin	Attributable	2006	0.535894	0.733315	0.338474
Maldives	Age-standardized	Both sexes	Deaths	Rate (per 100k)	Staphylococcus aureus	Methicillin	Attributable	2006	0.839764	1.41268	0.266846
Mexico	Age-standardized	Both sexes	Deaths	Rate (per 100k)	Staphylococcus aureus	Methicillin	Attributable	2006	1.82592	2.21315	1.43869
Marshall Islands	Age-standardized	Both sexes	Deaths	Rate (per 100k)	Staphylococcus aureus	Methicillin	Attributable	2006	1.64504	2.64449	0.645587
North Macedonia	Age-standardized	Both sexes	Deaths	Rate (per 100k)	Staphylococcus aureus	Methicillin	Attributable	2006	2.59838	3.35777	1.83899
Mali	Age-standardized	Both sexes	Deaths	Rate (per 100k)	Staphylococcus aureus	Methicillin	Attributable	2006	2.13562	2.87362	1.39763
Malta	Age-standardized	Both sexes	Deaths	Rate (per 100k)	Staphylococcus aureus	Methicillin	Attributable	2006	2.08653	2.39553	1.77752
Myanmar	Age-standardized	Both sexes	Deaths	Rate (per 100k)	Staphylococcus aureus	Methicillin	Attributable	2006	2.66012	3.39248	1.92776
Montenegro	Age-standardized	Both sexes	Deaths	Rate (per 100k)	Staphylococcus aureus	Methicillin	Attributable	2006	1.09069	1.60083	0.580557
Mongolia	Age-standardized	Both sexes	Deaths	Rate (per 100k)	Staphylococcus aureus	Methicillin	Attributable	2006	2.33632	3.2178	1.45484
Northern Mariana Islands	Age-standardized	Both sexes	Deaths	Rate (per 100k)	Staphylococcus aureus	Methicillin	Attributable	2006	1.21448	1.93621	0.492748
Mozambique	Age-standardized	Both sexes	Deaths	Rate (per 100k)	Staphylococcus aureus	Methicillin	Attributable	2006	1.19969	1.8066	0.592786
Mauritania	Age-standardized	Both sexes	Deaths	Rate (per 100k)	Staphylococcus aureus	Methicillin	Attributable	2006	0.996351	1.58194	0.410762
Mauritius	Age-standardized	Both sexes	Deaths	Rate (per 100k)	Staphylococcus aureus	Methicillin	Attributable	2006	1.12708	1.84407	0.410077
Malawi	Age-standardized	Both sexes	Deaths	Rate (per 100k)	Staphylococcus aureus	Methicillin	Attributable	2006	1.70011	2.35333	1.04689
Malaysia	Age-standardized	Both sexes	Deaths	Rate (per 100k)	Staphylococcus aureus	Methicillin	Attributable	2006	1.57228	1.84799	1.29658
Namibia	Age-standardized	Both sexes	Deaths	Rate (per 100k)	Staphylococcus aureus	Methicillin	Attributable	2006	1.0685	1.90633	0.230674
Niger	Age-standardized	Both sexes	Deaths	Rate (per 100k)	Staphylococcus aureus	Methicillin	Attributable	2006	1.17841	1.99083	0.365989
Nigeria	Age-standardized	Both sexes	Deaths	Rate (per 100k)	Staphylococcus aureus	Methicillin	Attributable	2006	1.71323	2.16065	1.2658
Nicaragua	Age-standardized	Both sexes	Deaths	Rate (per 100k)	Staphylococcus aureus	Methicillin	Attributable	2006	1.24661	1.59507	0.898151
Niue	Age-standardized	Both sexes	Deaths	Rate (per 100k)	Staphylococcus aureus	Methicillin	Attributable	2006	1.65924	2.72767	0.590809
Netherlands	Age-standardized	Both sexes	Deaths	Rate (per 100k)	Staphylococcus aureus	Methicillin	Attributable	2006	0.155698	0.186855	0.124541
Norway	Age-standardized	Both sexes	Deaths	Rate (per 100k)	Staphylococcus aureus	Methicillin	Attributable	2006	0.261011	0.435292	0.0867304
Nepal	Age-standardized	Both sexes	Deaths	Rate (per 100k)	Staphylococcus aureus	Methicillin	Attributable	2006	1.16527	1.73888	0.591665
Nauru	Age-standardized	Both sexes	Deaths	Rate (per 100k)	Staphylococcus aureus	Methicillin	Attributable	2006	1.64807	2.74324	0.552911
New Zealand	Age-standardized	Both sexes	Deaths	Rate (per 100k)	Staphylococcus aureus	Methicillin	Attributable	2006	0.313169	0.378258	0.248081
Oman	Age-standardized	Both sexes	Deaths	Rate (per 100k)	Staphylococcus aureus	Methicillin	Attributable	2006	0.766321	1.24491	0.28773
Pakistan	Age-standardized	Both sexes	Deaths	Rate (per 100k)	Staphylococcus aureus	Methicillin	Attributable	2006	1.43324	1.74794	1.11854
Panama	Age-standardized	Both sexes	Deaths	Rate (per 100k)	Staphylococcus aureus	Methicillin	Attributable	2006	1.15514	1.37905	0.931228
Peru	Age-standardized	Both sexes	Deaths	Rate (per 100k)	Staphylococcus aureus	Methicillin	Attributable	2006	2.36523	2.7854	1.94506
Philippines	Age-standardized	Both sexes	Deaths	Rate (per 100k)	Staphylococcus aureus	Methicillin	Attributable	2006	2.46636	2.90627	2.02645
Palau	Age-standardized	Both sexes	Deaths	Rate (per 100k)	Staphylococcus aureus	Methicillin	Attributable	2006	1.91498	3.1149	0.71507
Papua New Guinea	Age-standardized	Both sexes	Deaths	Rate (per 100k)	Staphylococcus aureus	Methicillin	Attributable	2006	1.00055	1.6975	0.303604
Poland	Age-standardized	Both sexes	Deaths	Rate (per 100k)	Staphylococcus aureus	Methicillin	Attributable	2006	1.0141	1.2297	0.798492
Puerto Rico	Age-standardized	Both sexes	Deaths	Rate (per 100k)	Staphylococcus aureus	Methicillin	Attributable	2006	1.54053	2.39287	0.688182
Democratic People's Republic of Korea	Age-standardized	Both sexes	Deaths	Rate (per 100k)	Staphylococcus aureus	Methicillin	Attributable	2006	1.72449	2.57132	0.877668
Portugal	Age-standardized	Both sexes	Deaths	Rate (per 100k)	Staphylococcus aureus	Methicillin	Attributable	2006	2.27558	2.61805	1.9331
Paraguay	Age-standardized	Both sexes	Deaths	Rate (per 100k)	Staphylococcus aureus	Methicillin	Attributable	2006	1.54851	1.84063	1.25638
Palestine	Age-standardized	Both sexes	Deaths	Rate (per 100k)	Staphylococcus aureus	Methicillin	Attributable	2006	2.62609	3.5764	1.67577
Qatar	Age-standardized	Both sexes	Deaths	Rate (per 100k)	Staphylococcus aureus	Methicillin	Attributable	2006	3.49737	4.74242	2.25232
Romania	Age-standardized	Both sexes	Deaths	Rate (per 100k)	Staphylococcus aureus	Methicillin	Attributable	2006	2.18345	2.58593	1.78096
Russian Federation	Age-standardized	Both sexes	Deaths	Rate (per 100k)	Staphylococcus aureus	Methicillin	Attributable	2006	1.57152	2.11687	1.02618
Rwanda	Age-standardized	Both sexes	Deaths	Rate (per 100k)	Staphylococcus aureus	Methicillin	Attributable	2006	3.1532	4.23995	2.06645
Saudi Arabia	Age-standardized	Both sexes	Deaths	Rate (per 100k)	Staphylococcus aureus	Methicillin	Attributable	2006	1.63742	2.17228	1.10256
Senegal	Age-standardized	Both sexes	Deaths	Rate (per 100k)	Staphylococcus aureus	Methicillin	Attributable	2006	1.29286	1.93653	0.649183
Singapore	Age-standardized	Both sexes	Deaths	Rate (per 100k)	Staphylococcus aureus	Methicillin	Attributable	2006	0.589764	0.885829	0.2937
Solomon Islands	Age-standardized	Both sexes	Deaths	Rate (per 100k)	Staphylococcus aureus	Methicillin	Attributable	2006	1.03875	1.77592	0.301588
Sierra Leone	Age-standardized	Both sexes	Deaths	Rate (per 100k)	Staphylococcus aureus	Methicillin	Attributable	2006	1.47917	2.44034	0.517995
El Salvador	Age-standardized	Both sexes	Deaths	Rate (per 100k)	Staphylococcus aureus	Methicillin	Attributable	2006	1.69749	1.91467	1.48032
San Marino	Age-standardized	Both sexes	Deaths	Rate (per 100k)	Staphylococcus aureus	Methicillin	Attributable	2006	0.761117	1.28561	0.236626
Somalia	Age-standardized	Both sexes	Deaths	Rate (per 100k)	Staphylococcus aureus	Methicillin	Attributable	2006	2.38464	3.41596	1.35332
Serbia	Age-standardized	Both sexes	Deaths	Rate (per 100k)	Staphylococcus aureus	Methicillin	Attributable	2006	1.80138	2.39934	1.20341
South Sudan	Age-standardized	Both sexes	Deaths	Rate (per 100k)	Staphylococcus aureus	Methicillin	Attributable	2006	0.966603	1.70678	0.22643
Sao Tome and Principe	Age-standardized	Both sexes	Deaths	Rate (per 100k)	Staphylococcus aureus	Methicillin	Attributable	2006	1.4901	2.52729	0.452909
Suriname	Age-standardized	Both sexes	Deaths	Rate (per 100k)	Staphylococcus aureus	Methicillin	Attributable	2006	1.25853	2.01943	0.49763
Slovakia	Age-standardized	Both sexes	Deaths	Rate (per 100k)	Staphylococcus aureus	Methicillin	Attributable	2006	1.26395	1.62716	0.90074
Slovenia	Age-standardized	Both sexes	Deaths	Rate (per 100k)	Staphylococcus aureus	Methicillin	Attributable	2006	0.657623	0.795099	0.520147
Sweden	Age-standardized	Both sexes	Deaths	Rate (per 100k)	Staphylococcus aureus	Methicillin	Attributable	2006	0.28377	0.353518	0.214022
Eswatini	Age-standardized	Both sexes	Deaths	Rate (per 100k)	Staphylococcus aureus	Methicillin	Attributable	2006	0.808996	1.36657	0.25142
Seychelles	Age-standardized	Both sexes	Deaths	Rate (per 100k)	Staphylococcus aureus	Methicillin	Attributable	2006	1.40917	2.34552	0.47283
Syrian Arab Republic	Age-standardized	Both sexes	Deaths	Rate (per 100k)	Staphylococcus aureus	Methicillin	Attributable	2006	1.86256	2.57106	1.15406
Chad	Age-standardized	Both sexes	Deaths	Rate (per 100k)	Staphylococcus aureus	Methicillin	Attributable	2006	1.39268	2.285	0.500354
Togo	Age-standardized	Both sexes	Deaths	Rate (per 100k)	Staphylococcus aureus	Methicillin	Attributable	2006	1.17653	1.82466	0.528408
Thailand	Age-standardized	Both sexes	Deaths	Rate (per 100k)	Staphylococcus aureus	Methicillin	Attributable	2006	1.54664	2.1119	0.981389
Tajikistan	Age-standardized	Both sexes	Deaths	Rate (per 100k)	Staphylococcus aureus	Methicillin	Attributable	2006	1.03843	1.7486	0.328248
Tokelau	Age-standardized	Both sexes	Deaths	Rate (per 100k)	Staphylococcus aureus	Methicillin	Attributable	2006	1.34717	2.17402	0.520312
Turkmenistan	Age-standardized	Both sexes	Deaths	Rate (per 100k)	Staphylococcus aureus	Methicillin	Attributable	2006	1.0932	1.82423	0.362172
Timor-Leste	Age-standardized	Both sexes	Deaths	Rate (per 100k)	Staphylococcus aureus	Methicillin	Attributable	2006	0.711604	1.24091	0.182302
Tonga	Age-standardized	Both sexes	Deaths	Rate (per 100k)	Staphylococcus aureus	Methicillin	Attributable	2006	1.06186	1.82803	0.295688
Trinidad and Tobago	Age-standardized	Both sexes	Deaths	Rate (per 100k)	Staphylococcus aureus	Methicillin	Attributable	2006	1.57918	2.45032	0.708048
Tunisia	Age-standardized	Both sexes	Deaths	Rate (per 100k)	Staphylococcus aureus	Methicillin	Attributable	2006	1.16999	1.6239	0.716077
Türkiye	Age-standardized	Both sexes	Deaths	Rate (per 100k)	Staphylococcus aureus	Methicillin	Attributable	2006	1.4949	1.91163	1.07817
Tuvalu	Age-standardized	Both sexes	Deaths	Rate (per 100k)	Staphylococcus aureus	Methicillin	Attributable	2006	1.08625	1.86476	0.307746
Taiwan (Province of China)	Age-standardized	Both sexes	Deaths	Rate (per 100k)	Staphylococcus aureus	Methicillin	Attributable	2006	3.2226	3.74531	2.69989
United Republic of Tanzania	Age-standardized	Both sexes	Deaths	Rate (per 100k)	Staphylococcus aureus	Methicillin	Attributable	2006	0.170947	0.293459	0.0484351
Uganda	Age-standardized	Both sexes	Deaths	Rate (per 100k)	Staphylococcus aureus	Methicillin	Attributable	2006	1.77444	2.33707	1.21181
Ukraine	Age-standardized	Both sexes	Deaths	Rate (per 100k)	Staphylococcus aureus	Methicillin	Attributable	2006	0.742771	1.19377	0.29177
Uruguay	Age-standardized	Both sexes	Deaths	Rate (per 100k)	Staphylococcus aureus	Methicillin	Attributable	2006	2.54073	3.09871	1.98275
United States of America	Age-standardized	Both sexes	Deaths	Rate (per 100k)	Staphylococcus aureus	Methicillin	Attributable	2006	2.57027	3.09498	2.04557
Uzbekistan	Age-standardized	Both sexes	Deaths	Rate (per 100k)	Staphylococcus aureus	Methicillin	Attributable	2006	0.897771	1.51307	0.282473
Saint Vincent and the Grenadines	Age-standardized	Both sexes	Deaths	Rate (per 100k)	Staphylococcus aureus	Methicillin	Attributable	2006	1.5384	2.41502	0.661774
Venezuela (Bolivarian Republic of)	Age-standardized	Both sexes	Deaths	Rate (per 100k)	Staphylococcus aureus	Methicillin	Attributable	2006	1.08481	1.31326	0.856362
United States Virgin Islands	Age-standardized	Both sexes	Deaths	Rate (per 100k)	Staphylococcus aureus	Methicillin	Attributable	2006	1.42908	2.24801	0.610149
Viet Nam	Age-standardized	Both sexes	Deaths	Rate (per 100k)	Staphylococcus aureus	Methicillin	Attributable	2006	1.55434	2.05514	1.05355
Vanuatu	Age-standardized	Both sexes	Deaths	Rate (per 100k)	Staphylococcus aureus	Methicillin	Attributable	2006	0.930299	1.57626	0.284339
Samoa	Age-standardized	Both sexes	Deaths	Rate (per 100k)	Staphylococcus aureus	Methicillin	Attributable	2006	1.01181	1.69675	0.326867
Yemen	Age-standardized	Both sexes	Deaths	Rate (per 100k)	Staphylococcus aureus	Methicillin	Attributable	2006	1.61065	2.37649	0.844798
South Africa	Age-standardized	Both sexes	Deaths	Rate (per 100k)	Staphylococcus aureus	Methicillin	Attributable	2006	2.15492	2.56802	1.74183
Zambia	Age-standardized	Both sexes	Deaths	Rate (per 100k)	Staphylococcus aureus	Methicillin	Attributable	2006	1.72547	2.64767	0.803279
Zimbabwe	Age-standardized	Both sexes	Deaths	Rate (per 100k)	Staphylococcus aureus	Methicillin	Attributable	2006	1.48421	2.56713	0.401286
Egypt	Age-standardized	Both sexes	Deaths	Rate (per 100k)	Staphylococcus aureus	Methicillin	Attributable	2006	3.03288	3.75331	2.31244
Sudan	Age-standardized	Both sexes	Deaths	Rate (per 100k)	Staphylococcus aureus	Methicillin	Attributable	2006	0.877874	1.23127	0.52448
China	Age-standardized	Both sexes	Deaths	Rate (per 100k)	Staphylococcus aureus	Methicillin	Attributable	2006	2.37427	2.72676	2.02178
Afghanistan	Age-standardized	Both sexes	Deaths	Rate (per 100k)	Staphylococcus aureus	Methicillin	Attributable	2007	2.43781	3.34727	1.52836
Angola	Age-standardized	Both sexes	Deaths	Rate (per 100k)	Staphylococcus aureus	Methicillin	Attributable	2007	0.168892	0.286356	0.0514272
Albania	Age-standardized	Both sexes	Deaths	Rate (per 100k)	Staphylococcus aureus	Methicillin	Attributable	2007	0.804648	1.33467	0.274621
Andorra	Age-standardized	Both sexes	Deaths	Rate (per 100k)	Staphylococcus aureus	Methicillin	Attributable	2007	0.762619	1.30305	0.222186
United Arab Emirates	Age-standardized	Both sexes	Deaths	Rate (per 100k)	Staphylococcus aureus	Methicillin	Attributable	2007	2.40685	3.58056	1.23314
Argentina	Age-standardized	Both sexes	Deaths	Rate (per 100k)	Staphylococcus aureus	Methicillin	Attributable	2007	3.20643	3.69321	2.71965
Armenia	Age-standardized	Both sexes	Deaths	Rate (per 100k)	Staphylococcus aureus	Methicillin	Attributable	2007	1.13676	1.86799	0.405529
American Samoa	Age-standardized	Both sexes	Deaths	Rate (per 100k)	Staphylococcus aureus	Methicillin	Attributable	2007	1.47366	2.37855	0.56878
Antigua and Barbuda	Age-standardized	Both sexes	Deaths	Rate (per 100k)	Staphylococcus aureus	Methicillin	Attributable	2007	1.71637	2.75515	0.67759
Australia	Age-standardized	Both sexes	Deaths	Rate (per 100k)	Staphylococcus aureus	Methicillin	Attributable	2007	1.09494	1.27993	0.909957
Austria	Age-standardized	Both sexes	Deaths	Rate (per 100k)	Staphylococcus aureus	Methicillin	Attributable	2007	0.672348	0.823399	0.521296
Azerbaijan	Age-standardized	Both sexes	Deaths	Rate (per 100k)	Staphylococcus aureus	Methicillin	Attributable	2007	0.788802	1.32259	0.255012
Burundi	Age-standardized	Both sexes	Deaths	Rate (per 100k)	Staphylococcus aureus	Methicillin	Attributable	2007	1.0479	1.8768	0.218999
Belgium	Age-standardized	Both sexes	Deaths	Rate (per 100k)	Staphylococcus aureus	Methicillin	Attributable	2007	1.51681	1.83275	1.20088
Benin	Age-standardized	Both sexes	Deaths	Rate (per 100k)	Staphylococcus aureus	Methicillin	Attributable	2007	1.99867	2.6555	1.34183
Burkina Faso	Age-standardized	Both sexes	Deaths	Rate (per 100k)	Staphylococcus aureus	Methicillin	Attributable	2007	0.60595	1.01749	0.194414
Bangladesh	Age-standardized	Both sexes	Deaths	Rate (per 100k)	Staphylococcus aureus	Methicillin	Attributable	2007	1.73161	2.44057	1.02265
Bulgaria	Age-standardized	Both sexes	Deaths	Rate (per 100k)	Staphylococcus aureus	Methicillin	Attributable	2007	1.36299	1.59342	1.13256
Bahrain	Age-standardized	Both sexes	Deaths	Rate (per 100k)	Staphylococcus aureus	Methicillin	Attributable	2007	3.06155	4.37834	1.74475
Bahamas	Age-standardized	Both sexes	Deaths	Rate (per 100k)	Staphylococcus aureus	Methicillin	Attributable	2007	1.64431	2.60491	0.683714
Bosnia and Herzegovina	Age-standardized	Both sexes	Deaths	Rate (per 100k)	Staphylococcus aureus	Methicillin	Attributable	2007	0.780103	1.13544	0.424769
Belarus	Age-standardized	Both sexes	Deaths	Rate (per 100k)	Staphylococcus aureus	Methicillin	Attributable	2007	1.21828	1.6604	0.776166
Belize	Age-standardized	Both sexes	Deaths	Rate (per 100k)	Staphylococcus aureus	Methicillin	Attributable	2007	1.54803	2.43097	0.665091
Bermuda	Age-standardized	Both sexes	Deaths	Rate (per 100k)	Staphylococcus aureus	Methicillin	Attributable	2007	1.23995	1.98979	0.490109
Bolivia (Plurinational State of)	Age-standardized	Both sexes	Deaths	Rate (per 100k)	Staphylococcus aureus	Methicillin	Attributable	2007	2.80844	3.40732	2.20956
Brazil	Age-standardized	Both sexes	Deaths	Rate (per 100k)	Staphylococcus aureus	Methicillin	Attributable	2007	1.5346	1.94564	1.12356
Barbados	Age-standardized	Both sexes	Deaths	Rate (per 100k)	Staphylococcus aureus	Methicillin	Attributable	2007	2.09225	3.2411	0.943406
Brunei Darussalam	Age-standardized	Both sexes	Deaths	Rate (per 100k)	Staphylococcus aureus	Methicillin	Attributable	2007	0.742854	1.18945	0.296256
Bhutan	Age-standardized	Both sexes	Deaths	Rate (per 100k)	Staphylococcus aureus	Methicillin	Attributable	2007	0.59945	0.97704	0.221861
Botswana	Age-standardized	Both sexes	Deaths	Rate (per 100k)	Staphylococcus aureus	Methicillin	Attributable	2007	0.951717	1.45441	0.449026
Central African Republic	Age-standardized	Both sexes	Deaths	Rate (per 100k)	Staphylococcus aureus	Methicillin	Attributable	2007	2.18997	3.07186	1.30807
Canada	Age-standardized	Both sexes	Deaths	Rate (per 100k)	Staphylococcus aureus	Methicillin	Attributable	2007	1.08217	1.46095	0.703387
Switzerland	Age-standardized	Both sexes	Deaths	Rate (per 100k)	Staphylococcus aureus	Methicillin	Attributable	2007	0.291423	0.394534	0.188311
Chile	Age-standardized	Both sexes	Deaths	Rate (per 100k)	Staphylococcus aureus	Methicillin	Attributable	2007	2.90099	3.45697	2.345
Côte d'Ivoire	Age-standardized	Both sexes	Deaths	Rate (per 100k)	Staphylococcus aureus	Methicillin	Attributable	2007	1.14537	1.81565	0.475084
Cameroon	Age-standardized	Both sexes	Deaths	Rate (per 100k)	Staphylococcus aureus	Methicillin	Attributable	2007	1.63476	2.38644	0.883077
Democratic Republic of the Congo	Age-standardized	Both sexes	Deaths	Rate (per 100k)	Staphylococcus aureus	Methicillin	Attributable	2007	1.82252	2.50331	1.14173
Congo	Age-standardized	Both sexes	Deaths	Rate (per 100k)	Staphylococcus aureus	Methicillin	Attributable	2007	2.52662	3.40095	1.65228
Cook Islands	Age-standardized	Both sexes	Deaths	Rate (per 100k)	Staphylococcus aureus	Methicillin	Attributable	2007	1.39945	2.23593	0.562965
Colombia	Age-standardized	Both sexes	Deaths	Rate (per 100k)	Staphylococcus aureus	Methicillin	Attributable	2007	1.3926	1.63303	1.15217
Comoros	Age-standardized	Both sexes	Deaths	Rate (per 100k)	Staphylococcus aureus	Methicillin	Attributable	2007	1.28577	2.19756	0.373974
Cabo Verde	Age-standardized	Both sexes	Deaths	Rate (per 100k)	Staphylococcus aureus	Methicillin	Attributable	2007	0.721805	1.24148	0.202132
Costa Rica	Age-standardized	Both sexes	Deaths	Rate (per 100k)	Staphylococcus aureus	Methicillin	Attributable	2007	1.64748	1.99236	1.3026
Cuba	Age-standardized	Both sexes	Deaths	Rate (per 100k)	Staphylococcus aureus	Methicillin	Attributable	2007	1.53481	2.00132	1.06829
Cyprus	Age-standardized	Both sexes	Deaths	Rate (per 100k)	Staphylococcus aureus	Methicillin	Attributable	2007	2.2002	2.57246	1.82795
Czechia	Age-standardized	Both sexes	Deaths	Rate (per 100k)	Staphylococcus aureus	Methicillin	Attributable	2007	0.696	0.830043	0.561958
Germany	Age-standardized	Both sexes	Deaths	Rate (per 100k)	Staphylococcus aureus	Methicillin	Attributable	2007	0.929354	1.10083	0.757877
Djibouti	Age-standardized	Both sexes	Deaths	Rate (per 100k)	Staphylococcus aureus	Methicillin	Attributable	2007	0.880029	1.5707	0.189358
Dominica	Age-standardized	Both sexes	Deaths	Rate (per 100k)	Staphylococcus aureus	Methicillin	Attributable	2007	1.81075	2.73708	0.884419
Denmark	Age-standardized	Both sexes	Deaths	Rate (per 100k)	Staphylococcus aureus	Methicillin	Attributable	2007	0.155365	0.184183	0.126546
Dominican Republic	Age-standardized	Both sexes	Deaths	Rate (per 100k)	Staphylococcus aureus	Methicillin	Attributable	2007	1.30239	1.59254	1.01223
Algeria	Age-standardized	Both sexes	Deaths	Rate (per 100k)	Staphylococcus aureus	Methicillin	Attributable	2007	1.81873	2.34109	1.29637
Ecuador	Age-standardized	Both sexes	Deaths	Rate (per 100k)	Staphylococcus aureus	Methicillin	Attributable	2007	1.66528	1.97128	1.35929
Eritrea	Age-standardized	Both sexes	Deaths	Rate (per 100k)	Staphylococcus aureus	Methicillin	Attributable	2007	0.693534	1.15101	0.236054
Spain	Age-standardized	Both sexes	Deaths	Rate (per 100k)	Staphylococcus aureus	Methicillin	Attributable	2007	1.48276	1.79596	1.16956
Estonia	Age-standardized	Both sexes	Deaths	Rate (per 100k)	Staphylococcus aureus	Methicillin	Attributable	2007	0.290001	0.360255	0.219746
Ethiopia	Age-standardized	Both sexes	Deaths	Rate (per 100k)	Staphylococcus aureus	Methicillin	Attributable	2007	1.67608	2.19562	1.15653
Finland	Age-standardized	Both sexes	Deaths	Rate (per 100k)	Staphylococcus aureus	Methicillin	Attributable	2007	0.135683	0.163901	0.107466
Fiji	Age-standardized	Both sexes	Deaths	Rate (per 100k)	Staphylococcus aureus	Methicillin	Attributable	2007	1.62221	2.42406	0.820367
France	Age-standardized	Both sexes	Deaths	Rate (per 100k)	Staphylococcus aureus	Methicillin	Attributable	2007	1.50652	1.80617	1.20687
Micronesia (Federated States of)	Age-standardized	Both sexes	Deaths	Rate (per 100k)	Staphylococcus aureus	Methicillin	Attributable	2007	1.31518	2.21929	0.411076
Gabon	Age-standardized	Both sexes	Deaths	Rate (per 100k)	Staphylococcus aureus	Methicillin	Attributable	2007	1.66261	2.44269	0.882533
United Kingdom	Age-standardized	Both sexes	Deaths	Rate (per 100k)	Staphylococcus aureus	Methicillin	Attributable	2007	2.06769	2.43415	1.70122
Georgia	Age-standardized	Both sexes	Deaths	Rate (per 100k)	Staphylococcus aureus	Methicillin	Attributable	2007	0.697673	0.997912	0.397434
Ghana	Age-standardized	Both sexes	Deaths	Rate (per 100k)	Staphylococcus aureus	Methicillin	Attributable	2007	1.79272	2.42626	1.15918
Guinea	Age-standardized	Both sexes	Deaths	Rate (per 100k)	Staphylococcus aureus	Methicillin	Attributable	2007	1.82227	2.93953	0.705005
Gambia	Age-standardized	Both sexes	Deaths	Rate (per 100k)	Staphylococcus aureus	Methicillin	Attributable	2007	1.66204	2.90665	0.417433
Guinea-Bissau	Age-standardized	Both sexes	Deaths	Rate (per 100k)	Staphylococcus aureus	Methicillin	Attributable	2007	1.46374	2.52279	0.404684
Equatorial Guinea	Age-standardized	Both sexes	Deaths	Rate (per 100k)	Staphylococcus aureus	Methicillin	Attributable	2007	1.55915	2.4487	0.669586
Greece	Age-standardized	Both sexes	Deaths	Rate (per 100k)	Staphylococcus aureus	Methicillin	Attributable	2007	2.07714	2.38024	1.77403
Grenada	Age-standardized	Both sexes	Deaths	Rate (per 100k)	Staphylococcus aureus	Methicillin	Attributable	2007	2.2855	3.5924	0.978592
Greenland	Age-standardized	Both sexes	Deaths	Rate (per 100k)	Staphylococcus aureus	Methicillin	Attributable	2007	1.43552	2.402	0.469043
Guatemala	Age-standardized	Both sexes	Deaths	Rate (per 100k)	Staphylococcus aureus	Methicillin	Attributable	2007	3.09083	3.55601	2.62566
Guam	Age-standardized	Both sexes	Deaths	Rate (per 100k)	Staphylococcus aureus	Methicillin	Attributable	2007	0.674764	1.0933	0.256231
Guyana	Age-standardized	Both sexes	Deaths	Rate (per 100k)	Staphylococcus aureus	Methicillin	Attributable	2007	1.77089	2.75241	0.789375
Honduras	Age-standardized	Both sexes	Deaths	Rate (per 100k)	Staphylococcus aureus	Methicillin	Attributable	2007	1.13871	1.44542	0.831993
Croatia	Age-standardized	Both sexes	Deaths	Rate (per 100k)	Staphylococcus aureus	Methicillin	Attributable	2007	1.6657	1.92614	1.40526
Haiti	Age-standardized	Both sexes	Deaths	Rate (per 100k)	Staphylococcus aureus	Methicillin	Attributable	2007	1.25348	1.85869	0.648264
Hungary	Age-standardized	Both sexes	Deaths	Rate (per 100k)	Staphylococcus aureus	Methicillin	Attributable	2007	1.37671	1.66995	1.08347
Indonesia	Age-standardized	Both sexes	Deaths	Rate (per 100k)	Staphylococcus aureus	Methicillin	Attributable	2007	1.38003	1.92782	0.832236
India	Age-standardized	Both sexes	Deaths	Rate (per 100k)	Staphylococcus aureus	Methicillin	Attributable	2007	1.86462	2.22268	1.50656
Ireland	Age-standardized	Both sexes	Deaths	Rate (per 100k)	Staphylococcus aureus	Methicillin	Attributable	2007	2.23249	2.59133	1.87366
Iran (Islamic Republic of)	Age-standardized	Both sexes	Deaths	Rate (per 100k)	Staphylococcus aureus	Methicillin	Attributable	2007	1.59605	2.05882	1.13329
Iraq	Age-standardized	Both sexes	Deaths	Rate (per 100k)	Staphylococcus aureus	Methicillin	Attributable	2007	2.61153	3.04008	2.18299
Iceland	Age-standardized	Both sexes	Deaths	Rate (per 100k)	Staphylococcus aureus	Methicillin	Attributable	2007	0.671609	1.17256	0.170664
Israel	Age-standardized	Both sexes	Deaths	Rate (per 100k)	Staphylococcus aureus	Methicillin	Attributable	2007	1.96121	2.63088	1.29155
Italy	Age-standardized	Both sexes	Deaths	Rate (per 100k)	Staphylococcus aureus	Methicillin	Attributable	2007	1.3573	1.61365	1.10095
Jamaica	Age-standardized	Both sexes	Deaths	Rate (per 100k)	Staphylococcus aureus	Methicillin	Attributable	2007	1.0816	1.73708	0.426125
Jordan	Age-standardized	Both sexes	Deaths	Rate (per 100k)	Staphylococcus aureus	Methicillin	Attributable	2007	2.06152	2.7542	1.36884
Japan	Age-standardized	Both sexes	Deaths	Rate (per 100k)	Staphylococcus aureus	Methicillin	Attributable	2007	1.75653	2.04498	1.46808
Kazakhstan	Age-standardized	Both sexes	Deaths	Rate (per 100k)	Staphylococcus aureus	Methicillin	Attributable	2007	1.53012	2.47706	0.583175
Kenya	Age-standardized	Both sexes	Deaths	Rate (per 100k)	Staphylococcus aureus	Methicillin	Attributable	2007	1.74317	2.18791	1.29843
Kyrgyzstan	Age-standardized	Both sexes	Deaths	Rate (per 100k)	Staphylococcus aureus	Methicillin	Attributable	2007	1.03819	1.76003	0.316343
Cambodia	Age-standardized	Both sexes	Deaths	Rate (per 100k)	Staphylococcus aureus	Methicillin	Attributable	2007	0.684608	1.01111	0.358105
Kiribati	Age-standardized	Both sexes	Deaths	Rate (per 100k)	Staphylococcus aureus	Methicillin	Attributable	2007	1.37858	2.26173	0.495434
Saint Kitts and Nevis	Age-standardized	Both sexes	Deaths	Rate (per 100k)	Staphylococcus aureus	Methicillin	Attributable	2007	2.09567	3.24328	0.948051
Republic of Korea	Age-standardized	Both sexes	Deaths	Rate (per 100k)	Staphylococcus aureus	Methicillin	Attributable	2007	1.66446	2.19247	1.13645
Kuwait	Age-standardized	Both sexes	Deaths	Rate (per 100k)	Staphylococcus aureus	Methicillin	Attributable	2007	1.90132	2.29536	1.50728
Lao People's Democratic Republic	Age-standardized	Both sexes	Deaths	Rate (per 100k)	Staphylococcus aureus	Methicillin	Attributable	2007	0.288451	0.408885	0.168018
Lebanon	Age-standardized	Both sexes	Deaths	Rate (per 100k)	Staphylococcus aureus	Methicillin	Attributable	2007	0.967566	1.54741	0.387719
Liberia	Age-standardized	Both sexes	Deaths	Rate (per 100k)	Staphylococcus aureus	Methicillin	Attributable	2007	1.04612	1.76987	0.322369
Libya	Age-standardized	Both sexes	Deaths	Rate (per 100k)	Staphylococcus aureus	Methicillin	Attributable	2007	1.09242	1.54883	0.635998
Saint Lucia	Age-standardized	Both sexes	Deaths	Rate (per 100k)	Staphylococcus aureus	Methicillin	Attributable	2007	1.51133	2.35006	0.672604
Sri Lanka	Age-standardized	Both sexes	Deaths	Rate (per 100k)	Staphylococcus aureus	Methicillin	Attributable	2007	1.78443	2.36933	1.19953
Lesotho	Age-standardized	Both sexes	Deaths	Rate (per 100k)	Staphylococcus aureus	Methicillin	Attributable	2007	0.396651	0.680684	0.112617
Lithuania	Age-standardized	Both sexes	Deaths	Rate (per 100k)	Staphylococcus aureus	Methicillin	Attributable	2007	0.485457	0.591104	0.37981
Luxembourg	Age-standardized	Both sexes	Deaths	Rate (per 100k)	Staphylococcus aureus	Methicillin	Attributable	2007	0.972348	1.14766	0.797032
Latvia	Age-standardized	Both sexes	Deaths	Rate (per 100k)	Staphylococcus aureus	Methicillin	Attributable	2007	0.861536	1.01471	0.708357
Morocco	Age-standardized	Both sexes	Deaths	Rate (per 100k)	Staphylococcus aureus	Methicillin	Attributable	2007	0.608511	0.794779	0.422244
Monaco	Age-standardized	Both sexes	Deaths	Rate (per 100k)	Staphylococcus aureus	Methicillin	Attributable	2007	0.963858	1.63639	0.29132
Republic of Moldova	Age-standardized	Both sexes	Deaths	Rate (per 100k)	Staphylococcus aureus	Methicillin	Attributable	2007	0.952684	1.52958	0.375787
Madagascar	Age-standardized	Both sexes	Deaths	Rate (per 100k)	Staphylococcus aureus	Methicillin	Attributable	2007	0.518518	0.70285	0.334185
Maldives	Age-standardized	Both sexes	Deaths	Rate (per 100k)	Staphylococcus aureus	Methicillin	Attributable	2007	0.807383	1.36641	0.248358
Mexico	Age-standardized	Both sexes	Deaths	Rate (per 100k)	Staphylococcus aureus	Methicillin	Attributable	2007	1.8665	2.23358	1.49943
Marshall Islands	Age-standardized	Both sexes	Deaths	Rate (per 100k)	Staphylococcus aureus	Methicillin	Attributable	2007	1.63775	2.64942	0.626077
North Macedonia	Age-standardized	Both sexes	Deaths	Rate (per 100k)	Staphylococcus aureus	Methicillin	Attributable	2007	2.67396	3.42489	1.92304
Mali	Age-standardized	Both sexes	Deaths	Rate (per 100k)	Staphylococcus aureus	Methicillin	Attributable	2007	2.20543	2.9492	1.46165
Malta	Age-standardized	Both sexes	Deaths	Rate (per 100k)	Staphylococcus aureus	Methicillin	Attributable	2007	2.10311	2.42045	1.78577
Myanmar	Age-standardized	Both sexes	Deaths	Rate (per 100k)	Staphylococcus aureus	Methicillin	Attributable	2007	2.56853	3.27647	1.86059
Montenegro	Age-standardized	Both sexes	Deaths	Rate (per 100k)	Staphylococcus aureus	Methicillin	Attributable	2007	1.06066	1.53738	0.583948
Mongolia	Age-standardized	Both sexes	Deaths	Rate (per 100k)	Staphylococcus aureus	Methicillin	Attributable	2007	2.34064	3.19922	1.48207
Northern Mariana Islands	Age-standardized	Both sexes	Deaths	Rate (per 100k)	Staphylococcus aureus	Methicillin	Attributable	2007	1.22405	1.94263	0.505475
Mozambique	Age-standardized	Both sexes	Deaths	Rate (per 100k)	Staphylococcus aureus	Methicillin	Attributable	2007	1.28055	1.8878	0.673302
Mauritania	Age-standardized	Both sexes	Deaths	Rate (per 100k)	Staphylococcus aureus	Methicillin	Attributable	2007	0.923186	1.46545	0.38092
Mauritius	Age-standardized	Both sexes	Deaths	Rate (per 100k)	Staphylococcus aureus	Methicillin	Attributable	2007	1.12003	1.8204	0.419655
Malawi	Age-standardized	Both sexes	Deaths	Rate (per 100k)	Staphylococcus aureus	Methicillin	Attributable	2007	1.71403	2.34012	1.08794
Malaysia	Age-standardized	Both sexes	Deaths	Rate (per 100k)	Staphylococcus aureus	Methicillin	Attributable	2007	1.52012	1.79607	1.24417
Namibia	Age-standardized	Both sexes	Deaths	Rate (per 100k)	Staphylococcus aureus	Methicillin	Attributable	2007	1.03598	1.85168	0.22027
Niger	Age-standardized	Both sexes	Deaths	Rate (per 100k)	Staphylococcus aureus	Methicillin	Attributable	2007	1.20983	2.04031	0.379352
Nigeria	Age-standardized	Both sexes	Deaths	Rate (per 100k)	Staphylococcus aureus	Methicillin	Attributable	2007	1.44975	1.83818	1.06132
Nicaragua	Age-standardized	Both sexes	Deaths	Rate (per 100k)	Staphylococcus aureus	Methicillin	Attributable	2007	1.35762	1.71371	1.00153
Niue	Age-standardized	Both sexes	Deaths	Rate (per 100k)	Staphylococcus aureus	Methicillin	Attributable	2007	1.7541	2.85625	0.651943
Netherlands	Age-standardized	Both sexes	Deaths	Rate (per 100k)	Staphylococcus aureus	Methicillin	Attributable	2007	0.170079	0.205497	0.13466
Norway	Age-standardized	Both sexes	Deaths	Rate (per 100k)	Staphylococcus aureus	Methicillin	Attributable	2007	0.270082	0.455585	0.0845796
Nepal	Age-standardized	Both sexes	Deaths	Rate (per 100k)	Staphylococcus aureus	Methicillin	Attributable	2007	1.51097	2.11083	0.911124
Nauru	Age-standardized	Both sexes	Deaths	Rate (per 100k)	Staphylococcus aureus	Methicillin	Attributable	2007	1.66237	2.75669	0.568053
New Zealand	Age-standardized	Both sexes	Deaths	Rate (per 100k)	Staphylococcus aureus	Methicillin	Attributable	2007	0.321037	0.38821	0.253864
Oman	Age-standardized	Both sexes	Deaths	Rate (per 100k)	Staphylococcus aureus	Methicillin	Attributable	2007	0.856073	1.36484	0.347307
Pakistan	Age-standardized	Both sexes	Deaths	Rate (per 100k)	Staphylococcus aureus	Methicillin	Attributable	2007	1.45921	1.76891	1.14951
Panama	Age-standardized	Both sexes	Deaths	Rate (per 100k)	Staphylococcus aureus	Methicillin	Attributable	2007	1.15506	1.3582	0.951912
Peru	Age-standardized	Both sexes	Deaths	Rate (per 100k)	Staphylococcus aureus	Methicillin	Attributable	2007	2.39396	2.83738	1.95054
Philippines	Age-standardized	Both sexes	Deaths	Rate (per 100k)	Staphylococcus aureus	Methicillin	Attributable	2007	2.53661	2.95804	2.11518
Palau	Age-standardized	Both sexes	Deaths	Rate (per 100k)	Staphylococcus aureus	Methicillin	Attributable	2007	1.85755	3.03659	0.678519
Papua New Guinea	Age-standardized	Both sexes	Deaths	Rate (per 100k)	Staphylococcus aureus	Methicillin	Attributable	2007	0.99433	1.68478	0.303885
Poland	Age-standardized	Both sexes	Deaths	Rate (per 100k)	Staphylococcus aureus	Methicillin	Attributable	2007	1.01556	1.24005	0.791073
Puerto Rico	Age-standardized	Both sexes	Deaths	Rate (per 100k)	Staphylococcus aureus	Methicillin	Attributable	2007	1.57475	2.43252	0.716986
Democratic People's Republic of Korea	Age-standardized	Both sexes	Deaths	Rate (per 100k)	Staphylococcus aureus	Methicillin	Attributable	2007	1.77134	2.63807	0.904598
Portugal	Age-standardized	Both sexes	Deaths	Rate (per 100k)	Staphylococcus aureus	Methicillin	Attributable	2007	2.39407	2.74748	2.04066
Paraguay	Age-standardized	Both sexes	Deaths	Rate (per 100k)	Staphylococcus aureus	Methicillin	Attributable	2007	1.60179	1.90765	1.29593
Palestine	Age-standardized	Both sexes	Deaths	Rate (per 100k)	Staphylococcus aureus	Methicillin	Attributable	2007	2.60113	3.50055	1.70171
Qatar	Age-standardized	Both sexes	Deaths	Rate (per 100k)	Staphylococcus aureus	Methicillin	Attributable	2007	3.57661	4.78618	2.36704
Romania	Age-standardized	Both sexes	Deaths	Rate (per 100k)	Staphylococcus aureus	Methicillin	Attributable	2007	2.08773	2.45508	1.72037
Russian Federation	Age-standardized	Both sexes	Deaths	Rate (per 100k)	Staphylococcus aureus	Methicillin	Attributable	2007	1.49999	2.00077	0.999219
Rwanda	Age-standardized	Both sexes	Deaths	Rate (per 100k)	Staphylococcus aureus	Methicillin	Attributable	2007	3.20459	4.27775	2.13144
Saudi Arabia	Age-standardized	Both sexes	Deaths	Rate (per 100k)	Staphylococcus aureus	Methicillin	Attributable	2007	1.76706	2.30369	1.23043
Senegal	Age-standardized	Both sexes	Deaths	Rate (per 100k)	Staphylococcus aureus	Methicillin	Attributable	2007	1.39347	2.08928	0.697659
Singapore	Age-standardized	Both sexes	Deaths	Rate (per 100k)	Staphylococcus aureus	Methicillin	Attributable	2007	0.636002	0.918276	0.353729
Solomon Islands	Age-standardized	Both sexes	Deaths	Rate (per 100k)	Staphylococcus aureus	Methicillin	Attributable	2007	1.07684	1.83621	0.317462
Sierra Leone	Age-standardized	Both sexes	Deaths	Rate (per 100k)	Staphylococcus aureus	Methicillin	Attributable	2007	1.48861	2.46365	0.513583
El Salvador	Age-standardized	Both sexes	Deaths	Rate (per 100k)	Staphylococcus aureus	Methicillin	Attributable	2007	1.70097	1.92069	1.48125
San Marino	Age-standardized	Both sexes	Deaths	Rate (per 100k)	Staphylococcus aureus	Methicillin	Attributable	2007	0.747412	1.25965	0.23517
Somalia	Age-standardized	Both sexes	Deaths	Rate (per 100k)	Staphylococcus aureus	Methicillin	Attributable	2007	2.59397	3.61106	1.57687
Serbia	Age-standardized	Both sexes	Deaths	Rate (per 100k)	Staphylococcus aureus	Methicillin	Attributable	2007	1.85801	2.42678	1.28924
South Sudan	Age-standardized	Both sexes	Deaths	Rate (per 100k)	Staphylococcus aureus	Methicillin	Attributable	2007	1.00171	1.76627	0.237157
Sao Tome and Principe	Age-standardized	Both sexes	Deaths	Rate (per 100k)	Staphylococcus aureus	Methicillin	Attributable	2007	1.51956	2.57037	0.46876
Suriname	Age-standardized	Both sexes	Deaths	Rate (per 100k)	Staphylococcus aureus	Methicillin	Attributable	2007	1.29785	2.07273	0.522971
Slovakia	Age-standardized	Both sexes	Deaths	Rate (per 100k)	Staphylococcus aureus	Methicillin	Attributable	2007	1.3043	1.65457	0.954031
Slovenia	Age-standardized	Both sexes	Deaths	Rate (per 100k)	Staphylococcus aureus	Methicillin	Attributable	2007	0.592827	0.720928	0.464727
Sweden	Age-standardized	Both sexes	Deaths	Rate (per 100k)	Staphylococcus aureus	Methicillin	Attributable	2007	0.300162	0.36832	0.232005
Eswatini	Age-standardized	Both sexes	Deaths	Rate (per 100k)	Staphylococcus aureus	Methicillin	Attributable	2007	0.81597	1.37102	0.260924
Seychelles	Age-standardized	Both sexes	Deaths	Rate (per 100k)	Staphylococcus aureus	Methicillin	Attributable	2007	1.4298	2.37307	0.486525
Syrian Arab Republic	Age-standardized	Both sexes	Deaths	Rate (per 100k)	Staphylococcus aureus	Methicillin	Attributable	2007	1.94349	2.65182	1.23516
Chad	Age-standardized	Both sexes	Deaths	Rate (per 100k)	Staphylococcus aureus	Methicillin	Attributable	2007	1.46061	2.37262	0.548607
Togo	Age-standardized	Both sexes	Deaths	Rate (per 100k)	Staphylococcus aureus	Methicillin	Attributable	2007	0.890513	1.42291	0.358116
Thailand	Age-standardized	Both sexes	Deaths	Rate (per 100k)	Staphylococcus aureus	Methicillin	Attributable	2007	1.63928	2.188	1.09055
Tajikistan	Age-standardized	Both sexes	Deaths	Rate (per 100k)	Staphylococcus aureus	Methicillin	Attributable	2007	1.07042	1.79733	0.343522
Tokelau	Age-standardized	Both sexes	Deaths	Rate (per 100k)	Staphylococcus aureus	Methicillin	Attributable	2007	1.35229	2.17198	0.532601
Turkmenistan	Age-standardized	Both sexes	Deaths	Rate (per 100k)	Staphylococcus aureus	Methicillin	Attributable	2007	1.05701	1.77366	0.340363
Timor-Leste	Age-standardized	Both sexes	Deaths	Rate (per 100k)	Staphylococcus aureus	Methicillin	Attributable	2007	0.722822	1.26582	0.179823
Tonga	Age-standardized	Both sexes	Deaths	Rate (per 100k)	Staphylococcus aureus	Methicillin	Attributable	2007	1.23766	2.0881	0.387209
Trinidad and Tobago	Age-standardized	Both sexes	Deaths	Rate (per 100k)	Staphylococcus aureus	Methicillin	Attributable	2007	1.53851	2.39308	0.683948
Tunisia	Age-standardized	Both sexes	Deaths	Rate (per 100k)	Staphylococcus aureus	Methicillin	Attributable	2007	1.17889	1.62593	0.731843
Türkiye	Age-standardized	Both sexes	Deaths	Rate (per 100k)	Staphylococcus aureus	Methicillin	Attributable	2007	1.58139	1.98838	1.1744
Tuvalu	Age-standardized	Both sexes	Deaths	Rate (per 100k)	Staphylococcus aureus	Methicillin	Attributable	2007	1.09929	1.87971	0.318879
Taiwan (Province of China)	Age-standardized	Both sexes	Deaths	Rate (per 100k)	Staphylococcus aureus	Methicillin	Attributable	2007	3.39394	3.91084	2.87705
United Republic of Tanzania	Age-standardized	Both sexes	Deaths	Rate (per 100k)	Staphylococcus aureus	Methicillin	Attributable	2007	0.172294	0.297414	0.047173
Uganda	Age-standardized	Both sexes	Deaths	Rate (per 100k)	Staphylococcus aureus	Methicillin	Attributable	2007	1.70905	2.23776	1.18035
Ukraine	Age-standardized	Both sexes	Deaths	Rate (per 100k)	Staphylococcus aureus	Methicillin	Attributable	2007	0.741528	1.18643	0.296622
Uruguay	Age-standardized	Both sexes	Deaths	Rate (per 100k)	Staphylococcus aureus	Methicillin	Attributable	2007	2.72327	3.32412	2.12243
United States of America	Age-standardized	Both sexes	Deaths	Rate (per 100k)	Staphylococcus aureus	Methicillin	Attributable	2007	2.55192	3.02893	2.07491
Uzbekistan	Age-standardized	Both sexes	Deaths	Rate (per 100k)	Staphylococcus aureus	Methicillin	Attributable	2007	0.88462	1.4868	0.28244
Saint Vincent and the Grenadines	Age-standardized	Both sexes	Deaths	Rate (per 100k)	Staphylococcus aureus	Methicillin	Attributable	2007	1.57619	2.45873	0.693656
Venezuela (Bolivarian Republic of)	Age-standardized	Both sexes	Deaths	Rate (per 100k)	Staphylococcus aureus	Methicillin	Attributable	2007	1.22134	1.4592	0.98347
United States Virgin Islands	Age-standardized	Both sexes	Deaths	Rate (per 100k)	Staphylococcus aureus	Methicillin	Attributable	2007	1.38453	2.17006	0.598998
Viet Nam	Age-standardized	Both sexes	Deaths	Rate (per 100k)	Staphylococcus aureus	Methicillin	Attributable	2007	1.55662	2.03241	1.08084
Vanuatu	Age-standardized	Both sexes	Deaths	Rate (per 100k)	Staphylococcus aureus	Methicillin	Attributable	2007	0.947586	1.59737	0.297801
Samoa	Age-standardized	Both sexes	Deaths	Rate (per 100k)	Staphylococcus aureus	Methicillin	Attributable	2007	1.04902	1.75466	0.343378
Yemen	Age-standardized	Both sexes	Deaths	Rate (per 100k)	Staphylococcus aureus	Methicillin	Attributable	2007	1.68728	2.48509	0.88948
South Africa	Age-standardized	Both sexes	Deaths	Rate (per 100k)	Staphylococcus aureus	Methicillin	Attributable	2007	2.19164	2.58763	1.79566
Zambia	Age-standardized	Both sexes	Deaths	Rate (per 100k)	Staphylococcus aureus	Methicillin	Attributable	2007	1.78489	2.68065	0.889125
Zimbabwe	Age-standardized	Both sexes	Deaths	Rate (per 100k)	Staphylococcus aureus	Methicillin	Attributable	2007	1.46775	2.54734	0.388151
Egypt	Age-standardized	Both sexes	Deaths	Rate (per 100k)	Staphylococcus aureus	Methicillin	Attributable	2007	2.8118	3.50716	2.11644
Sudan	Age-standardized	Both sexes	Deaths	Rate (per 100k)	Staphylococcus aureus	Methicillin	Attributable	2007	0.892348	1.23102	0.553675
China	Age-standardized	Both sexes	Deaths	Rate (per 100k)	Staphylococcus aureus	Methicillin	Attributable	2007	2.32655	2.66668	1.98643
Afghanistan	Age-standardized	Both sexes	Deaths	Rate (per 100k)	Staphylococcus aureus	Methicillin	Attributable	2008	2.42853	3.3236	1.53346
Angola	Age-standardized	Both sexes	Deaths	Rate (per 100k)	Staphylococcus aureus	Methicillin	Attributable	2008	0.171103	0.291414	0.0507913
Albania	Age-standardized	Both sexes	Deaths	Rate (per 100k)	Staphylococcus aureus	Methicillin	Attributable	2008	0.810515	1.35403	0.266997
Andorra	Age-standardized	Both sexes	Deaths	Rate (per 100k)	Staphylococcus aureus	Methicillin	Attributable	2008	0.794035	1.35201	0.23606
United Arab Emirates	Age-standardized	Both sexes	Deaths	Rate (per 100k)	Staphylococcus aureus	Methicillin	Attributable	2008	2.73153	4.00785	1.4552
Argentina	Age-standardized	Both sexes	Deaths	Rate (per 100k)	Staphylococcus aureus	Methicillin	Attributable	2008	3.22623	3.69659	2.75587
Armenia	Age-standardized	Both sexes	Deaths	Rate (per 100k)	Staphylococcus aureus	Methicillin	Attributable	2008	1.13582	1.86775	0.403895
American Samoa	Age-standardized	Both sexes	Deaths	Rate (per 100k)	Staphylococcus aureus	Methicillin	Attributable	2008	1.52387	2.45649	0.591243
Antigua and Barbuda	Age-standardized	Both sexes	Deaths	Rate (per 100k)	Staphylococcus aureus	Methicillin	Attributable	2008	1.76658	2.83138	0.701774
Australia	Age-standardized	Both sexes	Deaths	Rate (per 100k)	Staphylococcus aureus	Methicillin	Attributable	2008	1.15331	1.33513	0.971491
Austria	Age-standardized	Both sexes	Deaths	Rate (per 100k)	Staphylococcus aureus	Methicillin	Attributable	2008	0.747815	0.904736	0.590894
Azerbaijan	Age-standardized	Both sexes	Deaths	Rate (per 100k)	Staphylococcus aureus	Methicillin	Attributable	2008	0.803279	1.34892	0.257643
Burundi	Age-standardized	Both sexes	Deaths	Rate (per 100k)	Staphylococcus aureus	Methicillin	Attributable	2008	1.1757	2.08301	0.268391
Belgium	Age-standardized	Both sexes	Deaths	Rate (per 100k)	Staphylococcus aureus	Methicillin	Attributable	2008	1.52522	1.83588	1.21456
Benin	Age-standardized	Both sexes	Deaths	Rate (per 100k)	Staphylococcus aureus	Methicillin	Attributable	2008	2.11622	2.78674	1.4457
Burkina Faso	Age-standardized	Both sexes	Deaths	Rate (per 100k)	Staphylococcus aureus	Methicillin	Attributable	2008	0.618324	1.04123	0.195416
Bangladesh	Age-standardized	Both sexes	Deaths	Rate (per 100k)	Staphylococcus aureus	Methicillin	Attributable	2008	1.73297	2.43189	1.03405
Bulgaria	Age-standardized	Both sexes	Deaths	Rate (per 100k)	Staphylococcus aureus	Methicillin	Attributable	2008	1.31773	1.55553	1.07993
Bahrain	Age-standardized	Both sexes	Deaths	Rate (per 100k)	Staphylococcus aureus	Methicillin	Attributable	2008	3.09165	4.36806	1.81524
Bahamas	Age-standardized	Both sexes	Deaths	Rate (per 100k)	Staphylococcus aureus	Methicillin	Attributable	2008	1.81436	2.82932	0.799403
Bosnia and Herzegovina	Age-standardized	Both sexes	Deaths	Rate (per 100k)	Staphylococcus aureus	Methicillin	Attributable	2008	0.783602	1.11574	0.451464
Belarus	Age-standardized	Both sexes	Deaths	Rate (per 100k)	Staphylococcus aureus	Methicillin	Attributable	2008	1.35945	1.79962	0.919273
Belize	Age-standardized	Both sexes	Deaths	Rate (per 100k)	Staphylococcus aureus	Methicillin	Attributable	2008	1.45812	2.31031	0.605927
Bermuda	Age-standardized	Both sexes	Deaths	Rate (per 100k)	Staphylococcus aureus	Methicillin	Attributable	2008	1.28413	2.05006	0.51819
Bolivia (Plurinational State of)	Age-standardized	Both sexes	Deaths	Rate (per 100k)	Staphylococcus aureus	Methicillin	Attributable	2008	2.90154	3.52932	2.27376
Brazil	Age-standardized	Both sexes	Deaths	Rate (per 100k)	Staphylococcus aureus	Methicillin	Attributable	2008	1.60449	2.01105	1.19792
Barbados	Age-standardized	Both sexes	Deaths	Rate (per 100k)	Staphylococcus aureus	Methicillin	Attributable	2008	2.14803	3.30689	0.98916
Brunei Darussalam	Age-standardized	Both sexes	Deaths	Rate (per 100k)	Staphylococcus aureus	Methicillin	Attributable	2008	0.779382	1.23468	0.324085
Bhutan	Age-standardized	Both sexes	Deaths	Rate (per 100k)	Staphylococcus aureus	Methicillin	Attributable	2008	0.584483	0.950736	0.218231
Botswana	Age-standardized	Both sexes	Deaths	Rate (per 100k)	Staphylococcus aureus	Methicillin	Attributable	2008	0.922727	1.40886	0.436594
Central African Republic	Age-standardized	Both sexes	Deaths	Rate (per 100k)	Staphylococcus aureus	Methicillin	Attributable	2008	2.21632	3.08894	1.34369
Canada	Age-standardized	Both sexes	Deaths	Rate (per 100k)	Staphylococcus aureus	Methicillin	Attributable	2008	1.06094	1.4198	0.702074
Switzerland	Age-standardized	Both sexes	Deaths	Rate (per 100k)	Staphylococcus aureus	Methicillin	Attributable	2008	0.285246	0.379065	0.191428
Chile	Age-standardized	Both sexes	Deaths	Rate (per 100k)	Staphylococcus aureus	Methicillin	Attributable	2008	2.72974	3.28125	2.17823
Côte d'Ivoire	Age-standardized	Both sexes	Deaths	Rate (per 100k)	Staphylococcus aureus	Methicillin	Attributable	2008	1.13414	1.79899	0.469296
Cameroon	Age-standardized	Both sexes	Deaths	Rate (per 100k)	Staphylococcus aureus	Methicillin	Attributable	2008	1.60506	2.32378	0.886335
Democratic Republic of the Congo	Age-standardized	Both sexes	Deaths	Rate (per 100k)	Staphylococcus aureus	Methicillin	Attributable	2008	1.33171	1.91728	0.746134
Congo	Age-standardized	Both sexes	Deaths	Rate (per 100k)	Staphylococcus aureus	Methicillin	Attributable	2008	2.5646	3.43663	1.69256
Cook Islands	Age-standardized	Both sexes	Deaths	Rate (per 100k)	Staphylococcus aureus	Methicillin	Attributable	2008	1.38321	2.20688	0.559532
Colombia	Age-standardized	Both sexes	Deaths	Rate (per 100k)	Staphylococcus aureus	Methicillin	Attributable	2008	1.40595	1.64213	1.16976
Comoros	Age-standardized	Both sexes	Deaths	Rate (per 100k)	Staphylococcus aureus	Methicillin	Attributable	2008	1.32741	2.26258	0.392232
Cabo Verde	Age-standardized	Both sexes	Deaths	Rate (per 100k)	Staphylococcus aureus	Methicillin	Attributable	2008	0.720911	1.23205	0.209777
Costa Rica	Age-standardized	Both sexes	Deaths	Rate (per 100k)	Staphylococcus aureus	Methicillin	Attributable	2008	1.61657	1.97569	1.25745
Cuba	Age-standardized	Both sexes	Deaths	Rate (per 100k)	Staphylococcus aureus	Methicillin	Attributable	2008	1.61085	2.08552	1.13617
Cyprus	Age-standardized	Both sexes	Deaths	Rate (per 100k)	Staphylococcus aureus	Methicillin	Attributable	2008	2.16121	2.50649	1.81592
Czechia	Age-standardized	Both sexes	Deaths	Rate (per 100k)	Staphylococcus aureus	Methicillin	Attributable	2008	0.815705	0.963364	0.668045
Germany	Age-standardized	Both sexes	Deaths	Rate (per 100k)	Staphylococcus aureus	Methicillin	Attributable	2008	0.937328	1.10423	0.770428
Djibouti	Age-standardized	Both sexes	Deaths	Rate (per 100k)	Staphylococcus aureus	Methicillin	Attributable	2008	0.910424	1.62204	0.19881
Dominica	Age-standardized	Both sexes	Deaths	Rate (per 100k)	Staphylococcus aureus	Methicillin	Attributable	2008	1.75692	2.69429	0.819553
Denmark	Age-standardized	Both sexes	Deaths	Rate (per 100k)	Staphylococcus aureus	Methicillin	Attributable	2008	0.155833	0.184964	0.126702
Dominican Republic	Age-standardized	Both sexes	Deaths	Rate (per 100k)	Staphylococcus aureus	Methicillin	Attributable	2008	1.34645	1.64929	1.04361
Algeria	Age-standardized	Both sexes	Deaths	Rate (per 100k)	Staphylococcus aureus	Methicillin	Attributable	2008	1.84479	2.36851	1.32106
Ecuador	Age-standardized	Both sexes	Deaths	Rate (per 100k)	Staphylococcus aureus	Methicillin	Attributable	2008	1.70683	2.00737	1.4063
Eritrea	Age-standardized	Both sexes	Deaths	Rate (per 100k)	Staphylococcus aureus	Methicillin	Attributable	2008	0.84576	1.42763	0.263889
Spain	Age-standardized	Both sexes	Deaths	Rate (per 100k)	Staphylococcus aureus	Methicillin	Attributable	2008	1.52381	1.84453	1.20308
Estonia	Age-standardized	Both sexes	Deaths	Rate (per 100k)	Staphylococcus aureus	Methicillin	Attributable	2008	0.275517	0.341537	0.209497
Ethiopia	Age-standardized	Both sexes	Deaths	Rate (per 100k)	Staphylococcus aureus	Methicillin	Attributable	2008	1.67351	2.18081	1.16622
Finland	Age-standardized	Both sexes	Deaths	Rate (per 100k)	Staphylococcus aureus	Methicillin	Attributable	2008	0.135929	0.162638	0.109221
Fiji	Age-standardized	Both sexes	Deaths	Rate (per 100k)	Staphylococcus aureus	Methicillin	Attributable	2008	1.67073	2.47732	0.86414
France	Age-standardized	Both sexes	Deaths	Rate (per 100k)	Staphylococcus aureus	Methicillin	Attributable	2008	1.5687	1.86931	1.26809
Micronesia (Federated States of)	Age-standardized	Both sexes	Deaths	Rate (per 100k)	Staphylococcus aureus	Methicillin	Attributable	2008	1.49262	2.49489	0.490355
Gabon	Age-standardized	Both sexes	Deaths	Rate (per 100k)	Staphylococcus aureus	Methicillin	Attributable	2008	1.66075	2.43454	0.886961
United Kingdom	Age-standardized	Both sexes	Deaths	Rate (per 100k)	Staphylococcus aureus	Methicillin	Attributable	2008	1.77342	2.10439	1.44245
Georgia	Age-standardized	Both sexes	Deaths	Rate (per 100k)	Staphylococcus aureus	Methicillin	Attributable	2008	0.812347	1.16121	0.463488
Ghana	Age-standardized	Both sexes	Deaths	Rate (per 100k)	Staphylococcus aureus	Methicillin	Attributable	2008	1.84416	2.46178	1.22655
Guinea	Age-standardized	Both sexes	Deaths	Rate (per 100k)	Staphylococcus aureus	Methicillin	Attributable	2008	1.70847	2.81132	0.605628
Gambia	Age-standardized	Both sexes	Deaths	Rate (per 100k)	Staphylococcus aureus	Methicillin	Attributable	2008	1.66013	2.87215	0.448114
Guinea-Bissau	Age-standardized	Both sexes	Deaths	Rate (per 100k)	Staphylococcus aureus	Methicillin	Attributable	2008	1.71369	2.87849	0.548889
Equatorial Guinea	Age-standardized	Both sexes	Deaths	Rate (per 100k)	Staphylococcus aureus	Methicillin	Attributable	2008	1.572	2.47661	0.667384
Greece	Age-standardized	Both sexes	Deaths	Rate (per 100k)	Staphylococcus aureus	Methicillin	Attributable	2008	2.06598	2.37694	1.75501
Grenada	Age-standardized	Both sexes	Deaths	Rate (per 100k)	Staphylococcus aureus	Methicillin	Attributable	2008	2.13955	3.41041	0.86868
Greenland	Age-standardized	Both sexes	Deaths	Rate (per 100k)	Staphylococcus aureus	Methicillin	Attributable	2008	1.42573	2.34686	0.5046
Guatemala	Age-standardized	Both sexes	Deaths	Rate (per 100k)	Staphylococcus aureus	Methicillin	Attributable	2008	3.15387	3.62252	2.68522
Guam	Age-standardized	Both sexes	Deaths	Rate (per 100k)	Staphylococcus aureus	Methicillin	Attributable	2008	0.690068	1.11802	0.26212
Guyana	Age-standardized	Both sexes	Deaths	Rate (per 100k)	Staphylococcus aureus	Methicillin	Attributable	2008	1.78529	2.76014	0.810434
Honduras	Age-standardized	Both sexes	Deaths	Rate (per 100k)	Staphylococcus aureus	Methicillin	Attributable	2008	1.3596	1.70528	1.01392
Croatia	Age-standardized	Both sexes	Deaths	Rate (per 100k)	Staphylococcus aureus	Methicillin	Attributable	2008	1.65064	1.91718	1.3841
Haiti	Age-standardized	Both sexes	Deaths	Rate (per 100k)	Staphylococcus aureus	Methicillin	Attributable	2008	1.29365	1.8938	0.693489
Hungary	Age-standardized	Both sexes	Deaths	Rate (per 100k)	Staphylococcus aureus	Methicillin	Attributable	2008	1.53971	1.83779	1.24164
Indonesia	Age-standardized	Both sexes	Deaths	Rate (per 100k)	Staphylococcus aureus	Methicillin	Attributable	2008	1.4749	1.97534	0.974459
India	Age-standardized	Both sexes	Deaths	Rate (per 100k)	Staphylococcus aureus	Methicillin	Attributable	2008	1.86533	2.20611	1.52456
Ireland	Age-standardized	Both sexes	Deaths	Rate (per 100k)	Staphylococcus aureus	Methicillin	Attributable	2008	2.08325	2.43604	1.73046
Iran (Islamic Republic of)	Age-standardized	Both sexes	Deaths	Rate (per 100k)	Staphylococcus aureus	Methicillin	Attributable	2008	1.56732	2.02693	1.10771
Iraq	Age-standardized	Both sexes	Deaths	Rate (per 100k)	Staphylococcus aureus	Methicillin	Attributable	2008	2.40925	2.81879	1.99971
Iceland	Age-standardized	Both sexes	Deaths	Rate (per 100k)	Staphylococcus aureus	Methicillin	Attributable	2008	0.666613	1.15816	0.175071
Israel	Age-standardized	Both sexes	Deaths	Rate (per 100k)	Staphylococcus aureus	Methicillin	Attributable	2008	1.98045	2.63028	1.33062
Italy	Age-standardized	Both sexes	Deaths	Rate (per 100k)	Staphylococcus aureus	Methicillin	Attributable	2008	1.3909	1.6503	1.13149
Jamaica	Age-standardized	Both sexes	Deaths	Rate (per 100k)	Staphylococcus aureus	Methicillin	Attributable	2008	0.987515	1.57611	0.39892
Jordan	Age-standardized	Both sexes	Deaths	Rate (per 100k)	Staphylococcus aureus	Methicillin	Attributable	2008	2.00939	2.65124	1.36755
Japan	Age-standardized	Both sexes	Deaths	Rate (per 100k)	Staphylococcus aureus	Methicillin	Attributable	2008	1.72114	1.98235	1.45992
Kazakhstan	Age-standardized	Both sexes	Deaths	Rate (per 100k)	Staphylococcus aureus	Methicillin	Attributable	2008	1.56359	2.51287	0.614301
Kenya	Age-standardized	Both sexes	Deaths	Rate (per 100k)	Staphylococcus aureus	Methicillin	Attributable	2008	1.80983	2.25937	1.36029
Kyrgyzstan	Age-standardized	Both sexes	Deaths	Rate (per 100k)	Staphylococcus aureus	Methicillin	Attributable	2008	1.00041	1.6945	0.306319
Cambodia	Age-standardized	Both sexes	Deaths	Rate (per 100k)	Staphylococcus aureus	Methicillin	Attributable	2008	0.733107	1.06444	0.401772
Kiribati	Age-standardized	Both sexes	Deaths	Rate (per 100k)	Staphylococcus aureus	Methicillin	Attributable	2008	1.40084	2.30698	0.494696
Saint Kitts and Nevis	Age-standardized	Both sexes	Deaths	Rate (per 100k)	Staphylococcus aureus	Methicillin	Attributable	2008	1.9972	3.13631	0.858087
Republic of Korea	Age-standardized	Both sexes	Deaths	Rate (per 100k)	Staphylococcus aureus	Methicillin	Attributable	2008	1.63614	2.12536	1.14692
Kuwait	Age-standardized	Both sexes	Deaths	Rate (per 100k)	Staphylococcus aureus	Methicillin	Attributable	2008	2.13096	2.54536	1.71656
Lao People's Democratic Republic	Age-standardized	Both sexes	Deaths	Rate (per 100k)	Staphylococcus aureus	Methicillin	Attributable	2008	0.272384	0.384323	0.160445
Lebanon	Age-standardized	Both sexes	Deaths	Rate (per 100k)	Staphylococcus aureus	Methicillin	Attributable	2008	1.00118	1.58976	0.412592
Liberia	Age-standardized	Both sexes	Deaths	Rate (per 100k)	Staphylococcus aureus	Methicillin	Attributable	2008	1.04027	1.76993	0.310607
Libya	Age-standardized	Both sexes	Deaths	Rate (per 100k)	Staphylococcus aureus	Methicillin	Attributable	2008	1.21885	1.70624	0.731455
Saint Lucia	Age-standardized	Both sexes	Deaths	Rate (per 100k)	Staphylococcus aureus	Methicillin	Attributable	2008	1.57595	2.42315	0.728745
Sri Lanka	Age-standardized	Both sexes	Deaths	Rate (per 100k)	Staphylococcus aureus	Methicillin	Attributable	2008	1.98684	2.6058	1.36788
Lesotho	Age-standardized	Both sexes	Deaths	Rate (per 100k)	Staphylococcus aureus	Methicillin	Attributable	2008	0.425267	0.73065	0.119883
Lithuania	Age-standardized	Both sexes	Deaths	Rate (per 100k)	Staphylococcus aureus	Methicillin	Attributable	2008	0.46532	0.559056	0.371585
Luxembourg	Age-standardized	Both sexes	Deaths	Rate (per 100k)	Staphylococcus aureus	Methicillin	Attributable	2008	0.920087	1.08792	0.752258
Latvia	Age-standardized	Both sexes	Deaths	Rate (per 100k)	Staphylococcus aureus	Methicillin	Attributable	2008	0.810746	0.965501	0.655992
Morocco	Age-standardized	Both sexes	Deaths	Rate (per 100k)	Staphylococcus aureus	Methicillin	Attributable	2008	0.632173	0.820927	0.443419
Monaco	Age-standardized	Both sexes	Deaths	Rate (per 100k)	Staphylococcus aureus	Methicillin	Attributable	2008	0.94001	1.59261	0.28741
Republic of Moldova	Age-standardized	Both sexes	Deaths	Rate (per 100k)	Staphylococcus aureus	Methicillin	Attributable	2008	0.989797	1.56992	0.409676
Madagascar	Age-standardized	Both sexes	Deaths	Rate (per 100k)	Staphylococcus aureus	Methicillin	Attributable	2008	0.587342	0.791365	0.383319
Maldives	Age-standardized	Both sexes	Deaths	Rate (per 100k)	Staphylococcus aureus	Methicillin	Attributable	2008	0.829371	1.39728	0.261464
Mexico	Age-standardized	Both sexes	Deaths	Rate (per 100k)	Staphylococcus aureus	Methicillin	Attributable	2008	1.96995	2.33867	1.60123
Marshall Islands	Age-standardized	Both sexes	Deaths	Rate (per 100k)	Staphylococcus aureus	Methicillin	Attributable	2008	1.75881	2.81944	0.698189
North Macedonia	Age-standardized	Both sexes	Deaths	Rate (per 100k)	Staphylococcus aureus	Methicillin	Attributable	2008	2.72347	3.38327	2.06367
Mali	Age-standardized	Both sexes	Deaths	Rate (per 100k)	Staphylococcus aureus	Methicillin	Attributable	2008	2.2396	3.01416	1.46503
Malta	Age-standardized	Both sexes	Deaths	Rate (per 100k)	Staphylococcus aureus	Methicillin	Attributable	2008	2.14168	2.45941	1.82395
Myanmar	Age-standardized	Both sexes	Deaths	Rate (per 100k)	Staphylococcus aureus	Methicillin	Attributable	2008	2.65271	3.35419	1.95122
Montenegro	Age-standardized	Both sexes	Deaths	Rate (per 100k)	Staphylococcus aureus	Methicillin	Attributable	2008	1.06507	1.53111	0.599031
Mongolia	Age-standardized	Both sexes	Deaths	Rate (per 100k)	Staphylococcus aureus	Methicillin	Attributable	2008	2.40444	3.28149	1.52738
Northern Mariana Islands	Age-standardized	Both sexes	Deaths	Rate (per 100k)	Staphylococcus aureus	Methicillin	Attributable	2008	1.26073	2.00783	0.513636
Mozambique	Age-standardized	Both sexes	Deaths	Rate (per 100k)	Staphylococcus aureus	Methicillin	Attributable	2008	1.39907	2.01567	0.782461
Mauritania	Age-standardized	Both sexes	Deaths	Rate (per 100k)	Staphylococcus aureus	Methicillin	Attributable	2008	0.961804	1.52848	0.395133
Mauritius	Age-standardized	Both sexes	Deaths	Rate (per 100k)	Staphylococcus aureus	Methicillin	Attributable	2008	1.18811	1.9237	0.452518
Malawi	Age-standardized	Both sexes	Deaths	Rate (per 100k)	Staphylococcus aureus	Methicillin	Attributable	2008	1.79615	2.42067	1.17162
Malaysia	Age-standardized	Both sexes	Deaths	Rate (per 100k)	Staphylococcus aureus	Methicillin	Attributable	2008	1.5569	1.83396	1.27984
Namibia	Age-standardized	Both sexes	Deaths	Rate (per 100k)	Staphylococcus aureus	Methicillin	Attributable	2008	1.04363	1.86758	0.219676
Niger	Age-standardized	Both sexes	Deaths	Rate (per 100k)	Staphylococcus aureus	Methicillin	Attributable	2008	1.20455	2.02934	0.379754
Nigeria	Age-standardized	Both sexes	Deaths	Rate (per 100k)	Staphylococcus aureus	Methicillin	Attributable	2008	1.51395	1.91525	1.11264
Nicaragua	Age-standardized	Both sexes	Deaths	Rate (per 100k)	Staphylococcus aureus	Methicillin	Attributable	2008	1.44183	1.81246	1.0712
Niue	Age-standardized	Both sexes	Deaths	Rate (per 100k)	Staphylococcus aureus	Methicillin	Attributable	2008	1.7708	2.89851	0.643083
Netherlands	Age-standardized	Both sexes	Deaths	Rate (per 100k)	Staphylococcus aureus	Methicillin	Attributable	2008	0.180365	0.216097	0.144633
Norway	Age-standardized	Both sexes	Deaths	Rate (per 100k)	Staphylococcus aureus	Methicillin	Attributable	2008	0.247785	0.415386	0.0801842
Nepal	Age-standardized	Both sexes	Deaths	Rate (per 100k)	Staphylococcus aureus	Methicillin	Attributable	2008	1.28662	1.85338	0.719849
Nauru	Age-standardized	Both sexes	Deaths	Rate (per 100k)	Staphylococcus aureus	Methicillin	Attributable	2008	1.76602	2.90277	0.629263
New Zealand	Age-standardized	Both sexes	Deaths	Rate (per 100k)	Staphylococcus aureus	Methicillin	Attributable	2008	0.360782	0.431487	0.290076
Oman	Age-standardized	Both sexes	Deaths	Rate (per 100k)	Staphylococcus aureus	Methicillin	Attributable	2008	1.03045	1.61372	0.447176
Pakistan	Age-standardized	Both sexes	Deaths	Rate (per 100k)	Staphylococcus aureus	Methicillin	Attributable	2008	1.50979	1.80738	1.21221
Panama	Age-standardized	Both sexes	Deaths	Rate (per 100k)	Staphylococcus aureus	Methicillin	Attributable	2008	1.18896	1.38558	0.992329
Peru	Age-standardized	Both sexes	Deaths	Rate (per 100k)	Staphylococcus aureus	Methicillin	Attributable	2008	2.39651	2.86944	1.92359
Philippines	Age-standardized	Both sexes	Deaths	Rate (per 100k)	Staphylococcus aureus	Methicillin	Attributable	2008	2.64152	3.06051	2.22254
Palau	Age-standardized	Both sexes	Deaths	Rate (per 100k)	Staphylococcus aureus	Methicillin	Attributable	2008	1.87387	3.07272	0.67501
Papua New Guinea	Age-standardized	Both sexes	Deaths	Rate (per 100k)	Staphylococcus aureus	Methicillin	Attributable	2008	1.03988	1.75384	0.32591
Poland	Age-standardized	Both sexes	Deaths	Rate (per 100k)	Staphylococcus aureus	Methicillin	Attributable	2008	1.03145	1.25354	0.809364
Puerto Rico	Age-standardized	Both sexes	Deaths	Rate (per 100k)	Staphylococcus aureus	Methicillin	Attributable	2008	1.55688	2.3915	0.722267
Democratic People's Republic of Korea	Age-standardized	Both sexes	Deaths	Rate (per 100k)	Staphylococcus aureus	Methicillin	Attributable	2008	1.7941	2.68862	0.899586
Portugal	Age-standardized	Both sexes	Deaths	Rate (per 100k)	Staphylococcus aureus	Methicillin	Attributable	2008	2.52139	2.8834	2.15939
Paraguay	Age-standardized	Both sexes	Deaths	Rate (per 100k)	Staphylococcus aureus	Methicillin	Attributable	2008	1.62638	1.92623	1.32653
Palestine	Age-standardized	Both sexes	Deaths	Rate (per 100k)	Staphylococcus aureus	Methicillin	Attributable	2008	2.94518	3.96299	1.92738
Qatar	Age-standardized	Both sexes	Deaths	Rate (per 100k)	Staphylococcus aureus	Methicillin	Attributable	2008	3.57569	4.7457	2.40567
Romania	Age-standardized	Both sexes	Deaths	Rate (per 100k)	Staphylococcus aureus	Methicillin	Attributable	2008	2.04195	2.40287	1.68103
Russian Federation	Age-standardized	Both sexes	Deaths	Rate (per 100k)	Staphylococcus aureus	Methicillin	Attributable	2008	1.55842	2.03958	1.07726
Rwanda	Age-standardized	Both sexes	Deaths	Rate (per 100k)	Staphylococcus aureus	Methicillin	Attributable	2008	3.43515	4.48501	2.38529
Saudi Arabia	Age-standardized	Both sexes	Deaths	Rate (per 100k)	Staphylococcus aureus	Methicillin	Attributable	2008	1.8754	2.4005	1.35031
Senegal	Age-standardized	Both sexes	Deaths	Rate (per 100k)	Staphylococcus aureus	Methicillin	Attributable	2008	1.42442	2.16111	0.687726
Singapore	Age-standardized	Both sexes	Deaths	Rate (per 100k)	Staphylococcus aureus	Methicillin	Attributable	2008	0.66466	0.941559	0.38776
Solomon Islands	Age-standardized	Both sexes	Deaths	Rate (per 100k)	Staphylococcus aureus	Methicillin	Attributable	2008	1.06078	1.80531	0.316244
Sierra Leone	Age-standardized	Both sexes	Deaths	Rate (per 100k)	Staphylococcus aureus	Methicillin	Attributable	2008	1.72579	2.7802	0.671384
El Salvador	Age-standardized	Both sexes	Deaths	Rate (per 100k)	Staphylococcus aureus	Methicillin	Attributable	2008	1.7124	1.92631	1.49849
San Marino	Age-standardized	Both sexes	Deaths	Rate (per 100k)	Staphylococcus aureus	Methicillin	Attributable	2008	0.750822	1.25957	0.242078
Somalia	Age-standardized	Both sexes	Deaths	Rate (per 100k)	Staphylococcus aureus	Methicillin	Attributable	2008	2.35986	3.36878	1.35095
Serbia	Age-standardized	Both sexes	Deaths	Rate (per 100k)	Staphylococcus aureus	Methicillin	Attributable	2008	1.86638	2.37649	1.35627
[truncated: 11,057 more rows]

## Sheet: Age-specific regional deathrate
Location	Age	Sex	Measure	Metric	Pathogen	Antibiotic.class	Counterfactual	Year	Value	Upper	Lower	SE
Oceania	70+ years	Both sexes	Deaths	Rate (per 100k)	Staphylococcus aureus	Methicillin	Attributable	1990	6.73305	12.0229	1.44319	2.69891
Oceania	70+ years	Both sexes	Deaths	Rate (per 100k)	Staphylococcus aureus	Methicillin	Attributable	1991	6.84211	11.965	1.71919	2.61374
Oceania	70+ years	Both sexes	Deaths	Rate (per 100k)	Staphylococcus aureus	Methicillin	Attributable	1992	6.88676	11.8816	1.8919	2.5484
Oceania	70+ years	Both sexes	Deaths	Rate (per 100k)	Staphylococcus aureus	Methicillin	Attributable	1993	7.04259	12.0495	2.03572	2.55453
Oceania	70+ years	Both sexes	Deaths	Rate (per 100k)	Staphylococcus aureus	Methicillin	Attributable	1994	7.15884	12.2247	2.09302	2.5846
Oceania	70+ years	Both sexes	Deaths	Rate (per 100k)	Staphylococcus aureus	Methicillin	Attributable	1995	7.04478	12.035	2.05457	2.54603
Oceania	70+ years	Both sexes	Deaths	Rate (per 100k)	Staphylococcus aureus	Methicillin	Attributable	1996	6.88163	11.6567	2.10657	2.43625
Oceania	70+ years	Both sexes	Deaths	Rate (per 100k)	Staphylococcus aureus	Methicillin	Attributable	1997	6.91371	11.7276	2.09986	2.45605
Oceania	70+ years	Both sexes	Deaths	Rate (per 100k)	Staphylococcus aureus	Methicillin	Attributable	1998	7.0976	12.0872	2.10796	2.54574
Oceania	70+ years	Both sexes	Deaths	Rate (per 100k)	Staphylococcus aureus	Methicillin	Attributable	1999	7.21026	12.3983	2.02219	2.64698
Oceania	70+ years	Both sexes	Deaths	Rate (per 100k)	Staphylococcus aureus	Methicillin	Attributable	2000	7.37598	12.5317	2.22029	2.63045
Oceania	70+ years	Both sexes	Deaths	Rate (per 100k)	Staphylococcus aureus	Methicillin	Attributable	2001	7.60048	12.8437	2.35724	2.67512
Oceania	70+ years	Both sexes	Deaths	Rate (per 100k)	Staphylococcus aureus	Methicillin	Attributable	2002	7.69755	13.0381	2.35695	2.72479
Oceania	70+ years	Both sexes	Deaths	Rate (per 100k)	Staphylococcus aureus	Methicillin	Attributable	2003	7.79524	13.2558	2.33463	2.78602
Oceania	70+ years	Both sexes	Deaths	Rate (per 100k)	Staphylococcus aureus	Methicillin	Attributable	2004	7.99924	13.4065	2.59199	2.7588
Oceania	70+ years	Both sexes	Deaths	Rate (per 100k)	Staphylococcus aureus	Methicillin	Attributable	2005	8.33774	13.8412	2.83429	2.80788
Oceania	70+ years	Both sexes	Deaths	Rate (per 100k)	Staphylococcus aureus	Methicillin	Attributable	2006	8.64709	14.3166	2.97754	2.89262
Oceania	70+ years	Both sexes	Deaths	Rate (per 100k)	Staphylococcus aureus	Methicillin	Attributable	2007	8.79505	14.5088	3.08133	2.91517
Oceania	70+ years	Both sexes	Deaths	Rate (per 100k)	Staphylococcus aureus	Methicillin	Attributable	2008	9.20298	15.0418	3.36412	2.97901
Oceania	70+ years	Both sexes	Deaths	Rate (per 100k)	Staphylococcus aureus	Methicillin	Attributable	2009	9.12005	14.864	3.37611	2.93058
Oceania	70+ years	Both sexes	Deaths	Rate (per 100k)	Staphylococcus aureus	Methicillin	Attributable	2010	9.23449	15.0238	3.44516	2.95374
Oceania	70+ years	Both sexes	Deaths	Rate (per 100k)	Staphylococcus aureus	Methicillin	Attributable	2011	9.447	15.4537	3.44026	3.06467
Oceania	70+ years	Both sexes	Deaths	Rate (per 100k)	Staphylococcus aureus	Methicillin	Attributable	2012	9.49101	15.3638	3.61821	2.99633
Oceania	70+ years	Both sexes	Deaths	Rate (per 100k)	Staphylococcus aureus	Methicillin	Attributable	2013	9.54687	15.586	3.50776	3.08118
Oceania	70+ years	Both sexes	Deaths	Rate (per 100k)	Staphylococcus aureus	Methicillin	Attributable	2014	9.54629	15.4717	3.62093	3.02315
Oceania	70+ years	Both sexes	Deaths	Rate (per 100k)	Staphylococcus aureus	Methicillin	Attributable	2015	9.31661	15.1845	3.44872	2.99382
Oceania	70+ years	Both sexes	Deaths	Rate (per 100k)	Staphylococcus aureus	Methicillin	Attributable	2016	9.16505	14.8325	3.49756	2.89158
Oceania	70+ years	Both sexes	Deaths	Rate (per 100k)	Staphylococcus aureus	Methicillin	Attributable	2017	9.23786	15.0289	3.4468	2.95462
Oceania	70+ years	Both sexes	Deaths	Rate (per 100k)	Staphylococcus aureus	Methicillin	Attributable	2018	9.02474	14.5617	3.48777	2.82499
Oceania	70+ years	Both sexes	Deaths	Rate (per 100k)	Staphylococcus aureus	Methicillin	Attributable	2019	9.17499	14.8805	3.46949	2.91097
Oceania	70+ years	Both sexes	Deaths	Rate (per 100k)	Staphylococcus aureus	Methicillin	Attributable	2020	9.21989	14.845	3.59481	2.86994
Oceania	70+ years	Both sexes	Deaths	Rate (per 100k)	Staphylococcus aureus	Methicillin	Attributable	2021	9.03931	14.4534	3.62527	2.76227
Southeast Asia	Age-standardized	Both sexes	Deaths	Rate (per 100k)	Staphylococcus aureus	Methicillin	Attributable	1990	1.18434	1.82318	0.545496	0.32594
Southeast Asia	Age-standardized	Both sexes	Deaths	Rate (per 100k)	Staphylococcus aureus	Methicillin	Attributable	1991	1.21451	1.85538	0.573641	0.326974
Southeast Asia	Age-standardized	Both sexes	Deaths	Rate (per 100k)	Staphylococcus aureus	Methicillin	Attributable	1992	1.21965	1.84357	0.595726	0.318328
Southeast Asia	Age-standardized	Both sexes	Deaths	Rate (per 100k)	Staphylococcus aureus	Methicillin	Attributable	1993	1.24546	1.87709	0.613818	0.322264
Southeast Asia	Age-standardized	Both sexes	Deaths	Rate (per 100k)	Staphylococcus aureus	Methicillin	Attributable	1994	1.25076	1.87732	0.624195	0.319675
Southeast Asia	Age-standardized	Both sexes	Deaths	Rate (per 100k)	Staphylococcus aureus	Methicillin	Attributable	1995	1.2719	1.89559	0.64821	0.318208
Southeast Asia	Age-standardized	Both sexes	Deaths	Rate (per 100k)	Staphylococcus aureus	Methicillin	Attributable	1996	1.31293	1.93109	0.694775	0.315386
Southeast Asia	Age-standardized	Both sexes	Deaths	Rate (per 100k)	Staphylococcus aureus	Methicillin	Attributable	1997	1.31611	1.92061	0.711613	0.308416
Southeast Asia	Age-standardized	Both sexes	Deaths	Rate (per 100k)	Staphylococcus aureus	Methicillin	Attributable	1998	1.31966	1.90678	0.732533	0.299554
Southeast Asia	Age-standardized	Both sexes	Deaths	Rate (per 100k)	Staphylococcus aureus	Methicillin	Attributable	1999	1.33724	1.92579	0.748696	0.300279
Southeast Asia	Age-standardized	Both sexes	Deaths	Rate (per 100k)	Staphylococcus aureus	Methicillin	Attributable	2000	1.34055	1.91208	0.769018	0.291597
Southeast Asia	Age-standardized	Both sexes	Deaths	Rate (per 100k)	Staphylococcus aureus	Methicillin	Attributable	2001	1.35469	1.90245	0.806936	0.279468
Southeast Asia	Age-standardized	Both sexes	Deaths	Rate (per 100k)	Staphylococcus aureus	Methicillin	Attributable	2002	1.47229	2.02989	0.914683	0.284491
Southeast Asia	Age-standardized	Both sexes	Deaths	Rate (per 100k)	Staphylococcus aureus	Methicillin	Attributable	2003	1.53524	2.09364	0.976845	0.284896
Southeast Asia	Age-standardized	Both sexes	Deaths	Rate (per 100k)	Staphylococcus aureus	Methicillin	Attributable	2004	1.61625	2.16409	1.0684	0.279513
Southeast Asia	Age-standardized	Both sexes	Deaths	Rate (per 100k)	Staphylococcus aureus	Methicillin	Attributable	2005	1.58844	2.09405	1.08282	0.257968
Southeast Asia	Age-standardized	Both sexes	Deaths	Rate (per 100k)	Staphylococcus aureus	Methicillin	Attributable	2006	1.65898	2.15355	1.16442	0.25233
Southeast Asia	Age-standardized	Both sexes	Deaths	Rate (per 100k)	Staphylococcus aureus	Methicillin	Attributable	2007	1.71328	2.20017	1.2264	0.24841
Southeast Asia	Age-standardized	Both sexes	Deaths	Rate (per 100k)	Staphylococcus aureus	Methicillin	Attributable	2008	1.79089	2.25166	1.33012	0.235086
Southeast Asia	Age-standardized	Both sexes	Deaths	Rate (per 100k)	Staphylococcus aureus	Methicillin	Attributable	2009	1.83708	2.26756	1.40661	0.21963
Southeast Asia	Age-standardized	Both sexes	Deaths	Rate (per 100k)	Staphylococcus aureus	Methicillin	Attributable	2010	1.87588	2.28347	1.46829	0.207952
Southeast Asia	Age-standardized	Both sexes	Deaths	Rate (per 100k)	Staphylococcus aureus	Methicillin	Attributable	2011	1.93471	2.32521	1.54421	0.199234
Southeast Asia	Age-standardized	Both sexes	Deaths	Rate (per 100k)	Staphylococcus aureus	Methicillin	Attributable	2012	1.91723	2.26583	1.56863	0.177856
Southeast Asia	Age-standardized	Both sexes	Deaths	Rate (per 100k)	Staphylococcus aureus	Methicillin	Attributable	2013	1.92893	2.26375	1.59411	0.170828
Southeast Asia	Age-standardized	Both sexes	Deaths	Rate (per 100k)	Staphylococcus aureus	Methicillin	Attributable	2014	1.94485	2.2367	1.653	0.148902
Southeast Asia	Age-standardized	Both sexes	Deaths	Rate (per 100k)	Staphylococcus aureus	Methicillin	Attributable	2015	1.98556	2.2676	1.70352	0.143898
Southeast Asia	Age-standardized	Both sexes	Deaths	Rate (per 100k)	Staphylococcus aureus	Methicillin	Attributable	2016	1.97504	2.23673	1.71335	0.133516
Southeast Asia	Age-standardized	Both sexes	Deaths	Rate (per 100k)	Staphylococcus aureus	Methicillin	Attributable	2017	1.95405	2.18636	1.72174	0.118526
Southeast Asia	Age-standardized	Both sexes	Deaths	Rate (per 100k)	Staphylococcus aureus	Methicillin	Attributable	2018	1.95328	2.16735	1.73922	0.109217
Southeast Asia	Age-standardized	Both sexes	Deaths	Rate (per 100k)	Staphylococcus aureus	Methicillin	Attributable	2019	1.99145	2.22016	1.76273	0.116691
Southeast Asia	Age-standardized	Both sexes	Deaths	Rate (per 100k)	Staphylococcus aureus	Methicillin	Attributable	2020	1.93147	2.19484	1.66811	0.134371
Southeast Asia	Age-standardized	Both sexes	Deaths	Rate (per 100k)	Staphylococcus aureus	Methicillin	Attributable	2021	1.91845	2.19209	1.64481	0.139613
Southeast Asia	Neonatal	Both sexes	Deaths	Rate (per 100k)	Staphylococcus aureus	Methicillin	Attributable	1990	79.9003	122.147	37.6531	21.5547
Southeast Asia	Neonatal	Both sexes	Deaths	Rate (per 100k)	Staphylococcus aureus	Methicillin	Attributable	1991	82.2077	127.022	37.3936	22.8643
Southeast Asia	Neonatal	Both sexes	Deaths	Rate (per 100k)	Staphylococcus aureus	Methicillin	Attributable	1992	82.0044	125.559	38.45	22.2216
Southeast Asia	Neonatal	Both sexes	Deaths	Rate (per 100k)	Staphylococcus aureus	Methicillin	Attributable	1993	83.1772	128.479	37.8755	23.1131
Southeast Asia	Neonatal	Both sexes	Deaths	Rate (per 100k)	Staphylococcus aureus	Methicillin	Attributable	1994	82.3969	126.587	38.2072	22.5458
Southeast Asia	Neonatal	Both sexes	Deaths	Rate (per 100k)	Staphylococcus aureus	Methicillin	Attributable	1995	82.1866	123.46	40.9137	21.0576
Southeast Asia	Neonatal	Both sexes	Deaths	Rate (per 100k)	Staphylococcus aureus	Methicillin	Attributable	1996	83.6331	126.012	41.2544	21.6218
Southeast Asia	Neonatal	Both sexes	Deaths	Rate (per 100k)	Staphylococcus aureus	Methicillin	Attributable	1997	83.3768	125.476	41.2777	21.4791
Southeast Asia	Neonatal	Both sexes	Deaths	Rate (per 100k)	Staphylococcus aureus	Methicillin	Attributable	1998	82.4662	118.772	46.1606	18.5233
Southeast Asia	Neonatal	Both sexes	Deaths	Rate (per 100k)	Staphylococcus aureus	Methicillin	Attributable	1999	81.3653	118.6	44.1303	18.9974
Southeast Asia	Neonatal	Both sexes	Deaths	Rate (per 100k)	Staphylococcus aureus	Methicillin	Attributable	2000	80.4022	118.311	42.4935	19.3412
Southeast Asia	Neonatal	Both sexes	Deaths	Rate (per 100k)	Staphylococcus aureus	Methicillin	Attributable	2001	80.0324	113.814	46.2505	17.2356
Southeast Asia	Neonatal	Both sexes	Deaths	Rate (per 100k)	Staphylococcus aureus	Methicillin	Attributable	2002	86.711	119.727	53.695	16.8449
Southeast Asia	Neonatal	Both sexes	Deaths	Rate (per 100k)	Staphylococcus aureus	Methicillin	Attributable	2003	87.7674	121.399	54.1363	17.1587
Southeast Asia	Neonatal	Both sexes	Deaths	Rate (per 100k)	Staphylococcus aureus	Methicillin	Attributable	2004	89.0814	122.81	55.3527	17.2086
Southeast Asia	Neonatal	Both sexes	Deaths	Rate (per 100k)	Staphylococcus aureus	Methicillin	Attributable	2005	85.3909	114.69	56.092	14.9484
Southeast Asia	Neonatal	Both sexes	Deaths	Rate (per 100k)	Staphylococcus aureus	Methicillin	Attributable	2006	84.1997	111.155	57.244	13.7529
Southeast Asia	Neonatal	Both sexes	Deaths	Rate (per 100k)	Staphylococcus aureus	Methicillin	Attributable	2007	85.0155	110.066	59.9655	12.7806
Southeast Asia	Neonatal	Both sexes	Deaths	Rate (per 100k)	Staphylococcus aureus	Methicillin	Attributable	2008	86.8128	114.491	59.1347	14.1215
Southeast Asia	Neonatal	Both sexes	Deaths	Rate (per 100k)	Staphylococcus aureus	Methicillin	Attributable	2009	87.764	115.466	60.0622	14.1335
Southeast Asia	Neonatal	Both sexes	Deaths	Rate (per 100k)	Staphylococcus aureus	Methicillin	Attributable	2010	87.1031	111.932	62.2737	12.668
Southeast Asia	Neonatal	Both sexes	Deaths	Rate (per 100k)	Staphylococcus aureus	Methicillin	Attributable	2011	87.5024	110.635	64.3702	11.8021
Southeast Asia	Neonatal	Both sexes	Deaths	Rate (per 100k)	Staphylococcus aureus	Methicillin	Attributable	2012	83.9844	105.385	62.584	10.9186
Southeast Asia	Neonatal	Both sexes	Deaths	Rate (per 100k)	Staphylococcus aureus	Methicillin	Attributable	2013	82.8968	104.004	61.7898	10.7689
Southeast Asia	Neonatal	Both sexes	Deaths	Rate (per 100k)	Staphylococcus aureus	Methicillin	Attributable	2014	82.9286	101.041	64.8157	9.24125
Southeast Asia	Neonatal	Both sexes	Deaths	Rate (per 100k)	Staphylococcus aureus	Methicillin	Attributable	2015	82.2492	100.451	64.0474	9.28661
Southeast Asia	Neonatal	Both sexes	Deaths	Rate (per 100k)	Staphylococcus aureus	Methicillin	Attributable	2016	78.9795	95.8883	62.0706	8.62695
Southeast Asia	Neonatal	Both sexes	Deaths	Rate (per 100k)	Staphylococcus aureus	Methicillin	Attributable	2017	77.3056	93.5425	61.0688	8.28411
Southeast Asia	Neonatal	Both sexes	Deaths	Rate (per 100k)	Staphylococcus aureus	Methicillin	Attributable	2018	75.06	92.1507	57.9694	8.71972
Southeast Asia	Neonatal	Both sexes	Deaths	Rate (per 100k)	Staphylococcus aureus	Methicillin	Attributable	2019	73.7954	90.4659	57.1248	8.50539
Southeast Asia	Neonatal	Both sexes	Deaths	Rate (per 100k)	Staphylococcus aureus	Methicillin	Attributable	2020	69.2278	86.3872	52.0685	8.75476
Southeast Asia	Neonatal	Both sexes	Deaths	Rate (per 100k)	Staphylococcus aureus	Methicillin	Attributable	2021	67.0669	82.7479	51.3859	8.00053
Southeast Asia	Post Neonatal to 5	Both sexes	Deaths	Rate (per 100k)	Staphylococcus aureus	Methicillin	Attributable	1990	0.810082	1.25564	0.364528	0.227323
Southeast Asia	Post Neonatal to 5	Both sexes	Deaths	Rate (per 100k)	Staphylococcus aureus	Methicillin	Attributable	1991	0.800488	1.22317	0.37781	0.215652
Southeast Asia	Post Neonatal to 5	Both sexes	Deaths	Rate (per 100k)	Staphylococcus aureus	Methicillin	Attributable	1992	0.774166	1.17422	0.374113	0.204109
Southeast Asia	Post Neonatal to 5	Both sexes	Deaths	Rate (per 100k)	Staphylococcus aureus	Methicillin	Attributable	1993	0.762426	1.14427	0.380578	0.19482
Southeast Asia	Post Neonatal to 5	Both sexes	Deaths	Rate (per 100k)	Staphylococcus aureus	Methicillin	Attributable	1994	0.734892	1.10417	0.36561	0.188409
Southeast Asia	Post Neonatal to 5	Both sexes	Deaths	Rate (per 100k)	Staphylococcus aureus	Methicillin	Attributable	1995	0.717415	1.06695	0.367879	0.178335
Southeast Asia	Post Neonatal to 5	Both sexes	Deaths	Rate (per 100k)	Staphylococcus aureus	Methicillin	Attributable	1996	0.724162	1.06177	0.386557	0.172247
Southeast Asia	Post Neonatal to 5	Both sexes	Deaths	Rate (per 100k)	Staphylococcus aureus	Methicillin	Attributable	1997	0.717193	1.03891	0.395481	0.164139
Southeast Asia	Post Neonatal to 5	Both sexes	Deaths	Rate (per 100k)	Staphylococcus aureus	Methicillin	Attributable	1998	0.705506	1.0137	0.397315	0.157241
Southeast Asia	Post Neonatal to 5	Both sexes	Deaths	Rate (per 100k)	Staphylococcus aureus	Methicillin	Attributable	1999	0.702677	0.998609	0.406744	0.150986
Southeast Asia	Post Neonatal to 5	Both sexes	Deaths	Rate (per 100k)	Staphylococcus aureus	Methicillin	Attributable	2000	0.690181	0.977119	0.403242	0.146397
Southeast Asia	Post Neonatal to 5	Both sexes	Deaths	Rate (per 100k)	Staphylococcus aureus	Methicillin	Attributable	2001	0.682429	0.951508	0.41335	0.137285
Southeast Asia	Post Neonatal to 5	Both sexes	Deaths	Rate (per 100k)	Staphylococcus aureus	Methicillin	Attributable	2002	0.713538	0.984884	0.442192	0.138442
Southeast Asia	Post Neonatal to 5	Both sexes	Deaths	Rate (per 100k)	Staphylococcus aureus	Methicillin	Attributable	2003	0.707253	0.955885	0.458621	0.126853
Southeast Asia	Post Neonatal to 5	Both sexes	Deaths	Rate (per 100k)	Staphylococcus aureus	Methicillin	Attributable	2004	0.70506	0.939686	0.470434	0.119707
Southeast Asia	Post Neonatal to 5	Both sexes	Deaths	Rate (per 100k)	Staphylococcus aureus	Methicillin	Attributable	2005	0.676294	0.883909	0.468679	0.105926
Southeast Asia	Post Neonatal to 5	Both sexes	Deaths	Rate (per 100k)	Staphylococcus aureus	Methicillin	Attributable	2006	0.658919	0.846494	0.471344	0.0957016
Southeast Asia	Post Neonatal to 5	Both sexes	Deaths	Rate (per 100k)	Staphylococcus aureus	Methicillin	Attributable	2007	0.653237	0.831529	0.474945	0.0909653
Southeast Asia	Post Neonatal to 5	Both sexes	Deaths	Rate (per 100k)	Staphylococcus aureus	Methicillin	Attributable	2008	0.663304	0.829274	0.497334	0.0846785
Southeast Asia	Post Neonatal to 5	Both sexes	Deaths	Rate (per 100k)	Staphylococcus aureus	Methicillin	Attributable	2009	0.6604	0.810916	0.509884	0.076794
Southeast Asia	Post Neonatal to 5	Both sexes	Deaths	Rate (per 100k)	Staphylococcus aureus	Methicillin	Attributable	2010	0.646695	0.792503	0.500888	0.0743915
Southeast Asia	Post Neonatal to 5	Both sexes	Deaths	Rate (per 100k)	Staphylococcus aureus	Methicillin	Attributable	2011	0.645404	0.780786	0.510022	0.0690725
Southeast Asia	Post Neonatal to 5	Both sexes	Deaths	Rate (per 100k)	Staphylococcus aureus	Methicillin	Attributable	2012	0.622005	0.750838	0.493171	0.0657315
Southeast Asia	Post Neonatal to 5	Both sexes	Deaths	Rate (per 100k)	Staphylococcus aureus	Methicillin	Attributable	2013	0.613231	0.735674	0.490787	0.0624713
Southeast Asia	Post Neonatal to 5	Both sexes	Deaths	Rate (per 100k)	Staphylococcus aureus	Methicillin	Attributable	2014	0.620469	0.732254	0.508684	0.057033
Southeast Asia	Post Neonatal to 5	Both sexes	Deaths	Rate (per 100k)	Staphylococcus aureus	Methicillin	Attributable	2015	0.62035	0.736422	0.504278	0.0592204
Southeast Asia	Post Neonatal to 5	Both sexes	Deaths	Rate (per 100k)	Staphylococcus aureus	Methicillin	Attributable	2016	0.607292	0.722583	0.492001	0.0588218
Southeast Asia	Post Neonatal to 5	Both sexes	Deaths	Rate (per 100k)	Staphylococcus aureus	Methicillin	Attributable	2017	0.599533	0.711676	0.487389	0.0572161
Southeast Asia	Post Neonatal to 5	Both sexes	Deaths	Rate (per 100k)	Staphylococcus aureus	Methicillin	Attributable	2018	0.587719	0.697971	0.477467	0.0562509
Southeast Asia	Post Neonatal to 5	Both sexes	Deaths	Rate (per 100k)	Staphylococcus aureus	Methicillin	Attributable	2019	0.583392	0.700081	0.466703	0.0595351
Southeast Asia	Post Neonatal to 5	Both sexes	Deaths	Rate (per 100k)	Staphylococcus aureus	Methicillin	Attributable	2020	0.527258	0.635166	0.41935	0.0550551
Southeast Asia	Post Neonatal to 5	Both sexes	Deaths	Rate (per 100k)	Staphylococcus aureus	Methicillin	Attributable	2021	0.485525	0.590308	0.380741	0.053461
Southeast Asia	5 to 49	Both sexes	Deaths	Rate (per 100k)	Staphylococcus aureus	Methicillin	Attributable	1990	0.140127	0.215295	0.0649583	0.0383511
Southeast Asia	5 to 49	Both sexes	Deaths	Rate (per 100k)	Staphylococcus aureus	Methicillin	Attributable	1991	0.144931	0.219363	0.0704986	0.0379757
Southeast Asia	5 to 49	Both sexes	Deaths	Rate (per 100k)	Staphylococcus aureus	Methicillin	Attributable	1992	0.144719	0.218012	0.0714248	0.0373948
Southeast Asia	5 to 49	Both sexes	Deaths	Rate (per 100k)	Staphylococcus aureus	Methicillin	Attributable	1993	0.146642	0.220415	0.0728684	0.0376394
Southeast Asia	5 to 49	Both sexes	Deaths	Rate (per 100k)	Staphylococcus aureus	Methicillin	Attributable	1994	0.146676	0.219241	0.0741123	0.0370225
Southeast Asia	5 to 49	Both sexes	Deaths	Rate (per 100k)	Staphylococcus aureus	Methicillin	Attributable	1995	0.15101	0.225243	0.0767778	0.0378736
Southeast Asia	5 to 49	Both sexes	Deaths	Rate (per 100k)	Staphylococcus aureus	Methicillin	Attributable	1996	0.157641	0.232363	0.0829198	0.0381232
Southeast Asia	5 to 49	Both sexes	Deaths	Rate (per 100k)	Staphylococcus aureus	Methicillin	Attributable	1997	0.157546	0.230074	0.0850183	0.037004
Southeast Asia	5 to 49	Both sexes	Deaths	Rate (per 100k)	Staphylococcus aureus	Methicillin	Attributable	1998	0.158092	0.227548	0.0886365	0.0354367
Southeast Asia	5 to 49	Both sexes	Deaths	Rate (per 100k)	Staphylococcus aureus	Methicillin	Attributable	1999	0.162266	0.232873	0.0916581	0.0360243
Southeast Asia	5 to 49	Both sexes	Deaths	Rate (per 100k)	Staphylococcus aureus	Methicillin	Attributable	2000	0.165073	0.236433	0.0937131	0.0364081
Southeast Asia	5 to 49	Both sexes	Deaths	Rate (per 100k)	Staphylococcus aureus	Methicillin	Attributable	2001	0.166569	0.23504	0.0980973	0.0349344
Southeast Asia	5 to 49	Both sexes	Deaths	Rate (per 100k)	Staphylococcus aureus	Methicillin	Attributable	2002	0.179484	0.247926	0.111042	0.0349195
Southeast Asia	5 to 49	Both sexes	Deaths	Rate (per 100k)	Staphylococcus aureus	Methicillin	Attributable	2003	0.187509	0.255537	0.119481	0.0347082
Southeast Asia	5 to 49	Both sexes	Deaths	Rate (per 100k)	Staphylococcus aureus	Methicillin	Attributable	2004	0.196029	0.262131	0.129928	0.0337252
Southeast Asia	5 to 49	Both sexes	Deaths	Rate (per 100k)	Staphylococcus aureus	Methicillin	Attributable	2005	0.190194	0.251375	0.129012	0.031215
Southeast Asia	5 to 49	Both sexes	Deaths	Rate (per 100k)	Staphylococcus aureus	Methicillin	Attributable	2006	0.198816	0.258214	0.139418	0.030305
Southeast Asia	5 to 49	Both sexes	Deaths	Rate (per 100k)	Staphylococcus aureus	Methicillin	Attributable	2007	0.20535	0.265679	0.145022	0.0307798
Southeast Asia	5 to 49	Both sexes	Deaths	Rate (per 100k)	Staphylococcus aureus	Methicillin	Attributable	2008	0.216121	0.273644	0.158598	0.0293485
Southeast Asia	5 to 49	Both sexes	Deaths	Rate (per 100k)	Staphylococcus aureus	Methicillin	Attributable	2009	0.223661	0.276698	0.170623	0.02706
Southeast Asia	5 to 49	Both sexes	Deaths	Rate (per 100k)	Staphylococcus aureus	Methicillin	Attributable	2010	0.227411	0.27889	0.175931	0.026265
Southeast Asia	5 to 49	Both sexes	Deaths	Rate (per 100k)	Staphylococcus aureus	Methicillin	Attributable	2011	0.232539	0.280278	0.184799	0.0243568
Southeast Asia	5 to 49	Both sexes	Deaths	Rate (per 100k)	Staphylococcus aureus	Methicillin	Attributable	2012	0.229539	0.27107	0.188008	0.0211894
Southeast Asia	5 to 49	Both sexes	Deaths	Rate (per 100k)	Staphylococcus aureus	Methicillin	Attributable	2013	0.231286	0.274387	0.188186	0.0219901
Southeast Asia	5 to 49	Both sexes	Deaths	Rate (per 100k)	Staphylococcus aureus	Methicillin	Attributable	2014	0.233504	0.268554	0.198453	0.0178828
Southeast Asia	5 to 49	Both sexes	Deaths	Rate (per 100k)	Staphylococcus aureus	Methicillin	Attributable	2015	0.240824	0.275095	0.206552	0.0174856
Southeast Asia	5 to 49	Both sexes	Deaths	Rate (per 100k)	Staphylococcus aureus	Methicillin	Attributable	2016	0.242153	0.273056	0.21125	0.0157669
Southeast Asia	5 to 49	Both sexes	Deaths	Rate (per 100k)	Staphylococcus aureus	Methicillin	Attributable	2017	0.242022	0.271746	0.212299	0.0151649
Southeast Asia	5 to 49	Both sexes	Deaths	Rate (per 100k)	Staphylococcus aureus	Methicillin	Attributable	2018	0.241196	0.269837	0.212555	0.0146127
Southeast Asia	5 to 49	Both sexes	Deaths	Rate (per 100k)	Staphylococcus aureus	Methicillin	Attributable	2019	0.247718	0.27871	0.216726	0.0158124
Southeast Asia	5 to 49	Both sexes	Deaths	Rate (per 100k)	Staphylococcus aureus	Methicillin	Attributable	2020	0.241709	0.275434	0.207984	0.0172068
Southeast Asia	5 to 49	Both sexes	Deaths	Rate (per 100k)	Staphylococcus aureus	Methicillin	Attributable	2021	0.242458	0.279285	0.20563	0.0187896
Southeast Asia	50-69 years	Both sexes	Deaths	Rate (per 100k)	Staphylococcus aureus	Methicillin	Attributable	1990	1.55173	2.3962	0.707255	0.430852
Southeast Asia	50-69 years	Both sexes	Deaths	Rate (per 100k)	Staphylococcus aureus	Methicillin	Attributable	1991	1.60284	2.47349	0.732195	0.444207
Southeast Asia	50-69 years	Both sexes	Deaths	Rate (per 100k)	Staphylococcus aureus	Methicillin	Attributable	1992	1.62218	2.47268	0.771685	0.433927
Southeast Asia	50-69 years	Both sexes	Deaths	Rate (per 100k)	Staphylococcus aureus	Methicillin	Attributable	1993	1.66945	2.53705	0.801853	0.442653
Southeast Asia	50-69 years	Both sexes	Deaths	Rate (per 100k)	Staphylococcus aureus	Methicillin	Attributable	1994	1.68964	2.54961	0.829661	0.438763
Southeast Asia	50-69 years	Both sexes	Deaths	Rate (per 100k)	Staphylococcus aureus	Methicillin	Attributable	1995	1.72765	2.59113	0.864162	0.440554
Southeast Asia	50-69 years	Both sexes	Deaths	Rate (per 100k)	Staphylococcus aureus	Methicillin	Attributable	1996	1.79136	2.65894	0.923774	0.442645
Southeast Asia	50-69 years	Both sexes	Deaths	Rate (per 100k)	Staphylococcus aureus	Methicillin	Attributable	1997	1.79766	2.62779	0.967525	0.423536
Southeast Asia	50-69 years	Both sexes	Deaths	Rate (per 100k)	Staphylococcus aureus	Methicillin	Attributable	1998	1.79725	2.59685	0.997655	0.407957
Southeast Asia	50-69 years	Both sexes	Deaths	Rate (per 100k)	Staphylococcus aureus	Methicillin	Attributable	1999	1.81614	2.64176	0.990517	0.421236
Southeast Asia	50-69 years	Both sexes	Deaths	Rate (per 100k)	Staphylococcus aureus	Methicillin	Attributable	2000	1.81281	2.60162	1.024	0.402454
Southeast Asia	50-69 years	Both sexes	Deaths	Rate (per 100k)	Staphylococcus aureus	Methicillin	Attributable	2001	1.81147	2.56808	1.05486	0.386026
Southeast Asia	50-69 years	Both sexes	Deaths	Rate (per 100k)	Staphylococcus aureus	Methicillin	Attributable	2002	1.95418	2.70371	1.20466	0.382411
Southeast Asia	50-69 years	Both sexes	Deaths	Rate (per 100k)	Staphylococcus aureus	Methicillin	Attributable	2003	2.02703	2.77796	1.2761	0.383126
Southeast Asia	50-69 years	Both sexes	Deaths	Rate (per 100k)	Staphylococcus aureus	Methicillin	Attributable	2004	2.12615	2.86809	1.38422	0.378539
Southeast Asia	50-69 years	Both sexes	Deaths	Rate (per 100k)	Staphylococcus aureus	Methicillin	Attributable	2005	2.06379	2.74186	1.38572	0.345952
Southeast Asia	50-69 years	Both sexes	Deaths	Rate (per 100k)	Staphylococcus aureus	Methicillin	Attributable	2006	2.13924	2.78778	1.4907	0.330888
Southeast Asia	50-69 years	Both sexes	Deaths	Rate (per 100k)	Staphylococcus aureus	Methicillin	Attributable	2007	2.19455	2.82491	1.56419	0.321612
Southeast Asia	50-69 years	Both sexes	Deaths	Rate (per 100k)	Staphylococcus aureus	Methicillin	Attributable	2008	2.27292	2.88229	1.66355	0.310903
Southeast Asia	50-69 years	Both sexes	Deaths	Rate (per 100k)	Staphylococcus aureus	Methicillin	Attributable	2009	2.32996	2.88266	1.77725	0.281993
Southeast Asia	50-69 years	Both sexes	Deaths	Rate (per 100k)	Staphylococcus aureus	Methicillin	Attributable	2010	2.37088	2.90157	1.84018	0.270762
Southeast Asia	50-69 years	Both sexes	Deaths	Rate (per 100k)	Staphylococcus aureus	Methicillin	Attributable	2011	2.43991	2.91769	1.96213	0.243765
Southeast Asia	50-69 years	Both sexes	Deaths	Rate (per 100k)	Staphylococcus aureus	Methicillin	Attributable	2012	2.41642	2.87673	1.9561	0.234857
Southeast Asia	50-69 years	Both sexes	Deaths	Rate (per 100k)	Staphylococcus aureus	Methicillin	Attributable	2013	2.43733	2.88852	1.98614	0.230197
Southeast Asia	50-69 years	Both sexes	Deaths	Rate (per 100k)	Staphylococcus aureus	Methicillin	Attributable	2014	2.46755	2.81989	2.1152	0.179768
Southeast Asia	50-69 years	Both sexes	Deaths	Rate (per 100k)	Staphylococcus aureus	Methicillin	Attributable	2015	2.54175	2.90835	2.17515	0.187042
Southeast Asia	50-69 years	Both sexes	Deaths	Rate (per 100k)	Staphylococcus aureus	Methicillin	Attributable	2016	2.55132	2.91922	2.18342	0.187703
Southeast Asia	50-69 years	Both sexes	Deaths	Rate (per 100k)	Staphylococcus aureus	Methicillin	Attributable	2017	2.55243	2.8667	2.23816	0.16034
Southeast Asia	50-69 years	Both sexes	Deaths	Rate (per 100k)	Staphylococcus aureus	Methicillin	Attributable	2018	2.57029	2.88162	2.25895	0.158844
Southeast Asia	50-69 years	Both sexes	Deaths	Rate (per 100k)	Staphylococcus aureus	Methicillin	Attributable	2019	2.63551	2.9644	2.30662	0.167802
Southeast Asia	50-69 years	Both sexes	Deaths	Rate (per 100k)	Staphylococcus aureus	Methicillin	Attributable	2020	2.62475	3.00804	2.24145	0.195558
Southeast Asia	50-69 years	Both sexes	Deaths	Rate (per 100k)	Staphylococcus aureus	Methicillin	Attributable	2021	2.62249	3.05045	2.19453	0.218348
Southeast Asia	70+ years	Both sexes	Deaths	Rate (per 100k)	Staphylococcus aureus	Methicillin	Attributable	1990	9.3796	14.5268	4.2324	2.62612
Southeast Asia	70+ years	Both sexes	Deaths	Rate (per 100k)	Staphylococcus aureus	Methicillin	Attributable	1991	9.63319	14.7155	4.55085	2.59303
Southeast Asia	70+ years	Both sexes	Deaths	Rate (per 100k)	Staphylococcus aureus	Methicillin	Attributable	1992	9.72335	14.6825	4.76423	2.53016
Southeast Asia	70+ years	Both sexes	Deaths	Rate (per 100k)	Staphylococcus aureus	Methicillin	Attributable	1993	9.96862	15.01	4.92719	2.57216
Southeast Asia	70+ years	Both sexes	Deaths	Rate (per 100k)	Staphylococcus aureus	Methicillin	Attributable	1994	10.0706	15.1064	5.03484	2.56928
Southeast Asia	70+ years	Both sexes	Deaths	Rate (per 100k)	Staphylococcus aureus	Methicillin	Attributable	1995	10.2833	15.3376	5.22907	2.5787
Southeast Asia	70+ years	Both sexes	Deaths	Rate (per 100k)	Staphylococcus aureus	Methicillin	Attributable	1996	10.6254	15.6024	5.64836	2.53929
Southeast Asia	70+ years	Both sexes	Deaths	Rate (per 100k)	Staphylococcus aureus	Methicillin	Attributable	1997	10.675	15.5943	5.75575	2.50984
Southeast Asia	70+ years	Both sexes	Deaths	Rate (per 100k)	Staphylococcus aureus	Methicillin	Attributable	1998	10.737	15.6357	5.83822	2.49936
Southeast Asia	70+ years	Both sexes	Deaths	Rate (per 100k)	Staphylococcus aureus	Methicillin	Attributable	1999	10.9044	15.7385	6.07032	2.46638
Southeast Asia	70+ years	Both sexes	Deaths	Rate (per 100k)	Staphylococcus aureus	Methicillin	Attributable	2000	10.947	15.5954	6.29858	2.37165
Southeast Asia	70+ years	Both sexes	Deaths	Rate (per 100k)	Staphylococcus aureus	Methicillin	Attributable	2001	11.1222	15.6083	6.63606	2.28883
Southeast Asia	70+ years	Both sexes	Deaths	Rate (per 100k)	Staphylococcus aureus	Methicillin	Attributable	2002	12.1509	16.856	7.44575	2.40057
Southeast Asia	70+ years	Both sexes	Deaths	Rate (per 100k)	Staphylococcus aureus	Methicillin	Attributable	2003	12.7831	17.5268	8.03946	2.42024
Southeast Asia	70+ years	Both sexes	Deaths	Rate (per 100k)	Staphylococcus aureus	Methicillin	Attributable	2004	13.6152	18.2643	8.9661	2.37199
Southeast Asia	70+ years	Both sexes	Deaths	Rate (per 100k)	Staphylococcus aureus	Methicillin	Attributable	2005	13.5212	17.8848	9.15757	2.22633
Southeast Asia	70+ years	Both sexes	Deaths	Rate (per 100k)	Staphylococcus aureus	Methicillin	Attributable	2006	14.2838	18.6539	9.91371	2.22964
Southeast Asia	70+ years	Both sexes	Deaths	Rate (per 100k)	Staphylococcus aureus	Methicillin	Attributable	2007	14.8711	19.272	10.4702	2.24535
Southeast Asia	70+ years	Both sexes	Deaths	Rate (per 100k)	Staphylococcus aureus	Methicillin	Attributable	2008	15.6859	19.7272	11.6447	2.06187
Southeast Asia	70+ years	Both sexes	Deaths	Rate (per 100k)	Staphylococcus aureus	Methicillin	Attributable	2009	16.1806	20.0038	12.3574	1.95063
Southeast Asia	70+ years	Both sexes	Deaths	Rate (per 100k)	Staphylococcus aureus	Methicillin	Attributable	2010	16.7062	20.3668	13.0455	1.86769
Southeast Asia	70+ years	Both sexes	Deaths	Rate (per 100k)	Staphylococcus aureus	Methicillin	Attributable	2011	17.4467	21.1116	13.7817	1.86986
Southeast Asia	70+ years	Both sexes	Deaths	Rate (per 100k)	Staphylococcus aureus	Methicillin	Attributable	2012	17.5121	20.7636	14.2607	1.65893
Southeast Asia	70+ years	Both sexes	Deaths	Rate (per 100k)	Staphylococcus aureus	Methicillin	Attributable	2013	17.7715	20.9053	14.6377	1.59889
Southeast Asia	70+ years	Both sexes	Deaths	Rate (per 100k)	Staphylococcus aureus	Methicillin	Attributable	2014	18.0327	20.9245	15.1408	1.47545
Southeast Asia	70+ years	Both sexes	Deaths	Rate (per 100k)	Staphylococcus aureus	Methicillin	Attributable	2015	18.5063	21.2954	15.7171	1.42303
Southeast Asia	70+ years	Both sexes	Deaths	Rate (per 100k)	Staphylococcus aureus	Methicillin	Attributable	2016	18.4887	21.1031	15.8742	1.3339
Southeast Asia	70+ years	Both sexes	Deaths	Rate (per 100k)	Staphylococcus aureus	Methicillin	Attributable	2017	18.3265	20.6855	15.9675	1.20358
Southeast Asia	70+ years	Both sexes	Deaths	Rate (per 100k)	Staphylococcus aureus	Methicillin	Attributable	2018	18.391	20.4977	16.2843	1.07484
Southeast Asia	70+ years	Both sexes	Deaths	Rate (per 100k)	Staphylococcus aureus	Methicillin	Attributable	2019	18.786	21.0921	16.4799	1.17659
Southeast Asia	70+ years	Both sexes	Deaths	Rate (per 100k)	Staphylococcus aureus	Methicillin	Attributable	2020	18.2195	20.8119	15.627	1.32267
Southeast Asia	70+ years	Both sexes	Deaths	Rate (per 100k)	Staphylococcus aureus	Methicillin	Attributable	2021	18.0369	20.6785	15.3952	1.34779
Central Sub-Saharan Africa	Age-standardized	Both sexes	Deaths	Rate (per 100k)	Staphylococcus aureus	Methicillin	Attributable	1990	1.14613	1.77343	0.518838	0.320049
Central Sub-Saharan Africa	Age-standardized	Both sexes	Deaths	Rate (per 100k)	Staphylococcus aureus	Methicillin	Attributable	1991	1.16773	1.79198	0.543478	0.318495
Central Sub-Saharan Africa	Age-standardized	Both sexes	Deaths	Rate (per 100k)	Staphylococcus aureus	Methicillin	Attributable	1992	1.33821	1.98918	0.687232	0.332131
Central Sub-Saharan Africa	Age-standardized	Both sexes	Deaths	Rate (per 100k)	Staphylococcus aureus	Methicillin	Attributable	1993	1.33953	1.98438	0.694674	0.329007
Central Sub-Saharan Africa	Age-standardized	Both sexes	Deaths	Rate (per 100k)	Staphylococcus aureus	Methicillin	Attributable	1994	1.37116	2.01524	0.727079	0.328613
Central Sub-Saharan Africa	Age-standardized	Both sexes	Deaths	Rate (per 100k)	Staphylococcus aureus	Methicillin	Attributable	1995	1.43175	2.07912	0.784389	0.330287
Central Sub-Saharan Africa	Age-standardized	Both sexes	Deaths	Rate (per 100k)	Staphylococcus aureus	Methicillin	Attributable	1996	1.49988	2.18353	0.816229	0.3488
Central Sub-Saharan Africa	Age-standardized	Both sexes	Deaths	Rate (per 100k)	Staphylococcus aureus	Methicillin	Attributable	1997	1.53351	2.21904	0.847977	0.349761
Central Sub-Saharan Africa	Age-standardized	Both sexes	Deaths	Rate (per 100k)	Staphylococcus aureus	Methicillin	Attributable	1998	1.50509	2.17099	0.839188	0.339746
Central Sub-Saharan Africa	Age-standardized	Both sexes	Deaths	Rate (per 100k)	Staphylococcus aureus	Methicillin	Attributable	1999	1.50488	2.17023	0.839528	0.339464
Central Sub-Saharan Africa	Age-standardized	Both sexes	Deaths	Rate (per 100k)	Staphylococcus aureus	Methicillin	Attributable	2000	1.52784	2.18725	0.868429	0.336433
Central Sub-Saharan Africa	Age-standardized	Both sexes	Deaths	Rate (per 100k)	Staphylococcus aureus	Methicillin	Attributable	2001	1.51895	2.15799	0.87992	0.326038
Central Sub-Saharan Africa	Age-standardized	Both sexes	Deaths	Rate (per 100k)	Staphylococcus aureus	Methicillin	Attributable	2002	1.35069	1.94845	0.752923	0.304982
Central Sub-Saharan Africa	Age-standardized	Both sexes	Deaths	Rate (per 100k)	Staphylococcus aureus	Methicillin	Attributable	2003	1.43655	2.05162	0.821481	0.313812
Central Sub-Saharan Africa	Age-standardized	Both sexes	Deaths	Rate (per 100k)	Staphylococcus aureus	Methicillin	Attributable	2004	1.40441	1.99602	0.812805	0.30184
Central Sub-Saharan Africa	Age-standardized	Both sexes	Deaths	Rate (per 100k)	Staphylococcus aureus	Methicillin	Attributable	2005	1.39229	1.97209	0.812489	0.295816
Central Sub-Saharan Africa	Age-standardized	Both sexes	Deaths	Rate (per 100k)	Staphylococcus aureus	Methicillin	Attributable	2006	1.55004	2.14742	0.952661	0.304785
Central Sub-Saharan Africa	Age-standardized	Both sexes	Deaths	Rate (per 100k)	Staphylococcus aureus	Methicillin	Attributable	2007	1.56129	2.15093	0.971653	0.300836
Central Sub-Saharan Africa	Age-standardized	Both sexes	Deaths	Rate (per 100k)	Staphylococcus aureus	Methicillin	Attributable	2008	1.21948	1.74274	0.69622	0.26697
Central Sub-Saharan Africa	Age-standardized	Both sexes	Deaths	Rate (per 100k)	Staphylococcus aureus	Methicillin	Attributable	2009	1.25537	1.78335	0.727399	0.269375
Central Sub-Saharan Africa	Age-standardized	Both sexes	Deaths	Rate (per 100k)	Staphylococcus aureus	Methicillin	Attributable	2010	1.2453	1.77406	0.716544	0.269776
Central Sub-Saharan Africa	Age-standardized	Both sexes	Deaths	Rate (per 100k)	Staphylococcus aureus	Methicillin	Attributable	2011	1.26616	1.79725	0.735064	0.270967
Central Sub-Saharan Africa	Age-standardized	Both sexes	Deaths	Rate (per 100k)	Staphylococcus aureus	Methicillin	Attributable	2012	1.27267	1.80357	0.741758	0.270871
Central Sub-Saharan Africa	Age-standardized	Both sexes	Deaths	Rate (per 100k)	Staphylococcus aureus	Methicillin	Attributable	2013	1.30118	1.85987	0.742501	0.285042
Central Sub-Saharan Africa	Age-standardized	Both sexes	Deaths	Rate (per 100k)	Staphylococcus aureus	Methicillin	Attributable	2014	1.32278	1.88689	0.758671	0.287811
Central Sub-Saharan Africa	Age-standardized	Both sexes	Deaths	Rate (per 100k)	Staphylococcus aureus	Methicillin	Attributable	2015	1.36233	1.9415	0.783157	0.295495
Central Sub-Saharan Africa	Age-standardized	Both sexes	Deaths	Rate (per 100k)	Staphylococcus aureus	Methicillin	Attributable	2016	1.35953	1.95514	0.763909	0.303886
Central Sub-Saharan Africa	Age-standardized	Both sexes	Deaths	Rate (per 100k)	Staphylococcus aureus	Methicillin	Attributable	2017	1.38883	1.98572	0.791943	0.304535
Central Sub-Saharan Africa	Age-standardized	Both sexes	Deaths	Rate (per 100k)	Staphylococcus aureus	Methicillin	Attributable	2018	1.40599	2.02585	0.786129	0.316255
Central Sub-Saharan Africa	Age-standardized	Both sexes	Deaths	Rate (per 100k)	Staphylococcus aureus	Methicillin	Attributable	2019	1.41877	2.05337	0.784169	0.323775
Central Sub-Saharan Africa	Age-standardized	Both sexes	Deaths	Rate (per 100k)	Staphylococcus aureus	Methicillin	Attributable	2020	1.41668	2.06347	0.769899	0.329992
Central Sub-Saharan Africa	Age-standardized	Both sexes	Deaths	Rate (per 100k)	Staphylococcus aureus	Methicillin	Attributable	2021	1.44493	2.10766	0.782204	0.338127
Central Sub-Saharan Africa	Neonatal	Both sexes	Deaths	Rate (per 100k)	Staphylococcus aureus	Methicillin	Attributable	1990	64.2405	102.041	26.4401	19.2859
Central Sub-Saharan Africa	Neonatal	Both sexes	Deaths	Rate (per 100k)	Staphylococcus aureus	Methicillin	Attributable	1991	64.8763	104.098	25.6542	20.0113
Central Sub-Saharan Africa	Neonatal	Both sexes	Deaths	Rate (per 100k)	Staphylococcus aureus	Methicillin	Attributable	1992	74.0714	114.079	34.0637	20.4121
Central Sub-Saharan Africa	Neonatal	Both sexes	Deaths	Rate (per 100k)	Staphylococcus aureus	Methicillin	Attributable	1993	73.5268	115.019	32.0348	21.1694
Central Sub-Saharan Africa	Neonatal	Both sexes	Deaths	Rate (per 100k)	Staphylococcus aureus	Methicillin	Attributable	1994	74.2223	113.821	34.6232	20.2036
Central Sub-Saharan Africa	Neonatal	Both sexes	Deaths	Rate (per 100k)	Staphylococcus aureus	Methicillin	Attributable	1995	76.2163	114.959	37.4739	19.7665
Central Sub-Saharan Africa	Neonatal	Both sexes	Deaths	Rate (per 100k)	Staphylococcus aureus	Methicillin	Attributable	1996	75.2805	115.131	35.4296	20.3321
Central Sub-Saharan Africa	Neonatal	Both sexes	Deaths	Rate (per 100k)	Staphylococcus aureus	Methicillin	Attributable	1997	78.7544	119.573	37.9355	20.826
Central Sub-Saharan Africa	Neonatal	Both sexes	Deaths	Rate (per 100k)	Staphylococcus aureus	Methicillin	Attributable	1998	77.6743	115.334	40.0148	19.214
Central Sub-Saharan Africa	Neonatal	Both sexes	Deaths	Rate (per 100k)	Staphylococcus aureus	Methicillin	Attributable	1999	78.0041	116.798	39.2103	19.7928
Central Sub-Saharan Africa	Neonatal	Both sexes	Deaths	Rate (per 100k)	Staphylococcus aureus	Methicillin	Attributable	2000	79.8347	118.502	41.167	19.7284
Central Sub-Saharan Africa	Neonatal	Both sexes	Deaths	Rate (per 100k)	Staphylococcus aureus	Methicillin	Attributable	2001	79.108	114.276	43.94	17.9428
Central Sub-Saharan Africa	Neonatal	Both sexes	Deaths	Rate (per 100k)	Staphylococcus aureus	Methicillin	Attributable	2002	71.9664	106.528	37.4049	17.6334
Central Sub-Saharan Africa	Neonatal	Both sexes	Deaths	Rate (per 100k)	Staphylococcus aureus	Methicillin	Attributable	2003	76.8545	113.791	39.9178	18.8452
Central Sub-Saharan Africa	Neonatal	Both sexes	Deaths	Rate (per 100k)	Staphylococcus aureus	Methicillin	Attributable	2004	76.3084	114.046	38.5703	19.2541
Central Sub-Saharan Africa	Neonatal	Both sexes	Deaths	Rate (per 100k)	Staphylococcus aureus	Methicillin	Attributable	2005	76.5529	115.526	37.5795	19.8844
Central Sub-Saharan Africa	Neonatal	Both sexes	Deaths	Rate (per 100k)	Staphylococcus aureus	Methicillin	Attributable	2006	85.4966	123.344	47.6496	19.3097
Central Sub-Saharan Africa	Neonatal	Both sexes	Deaths	Rate (per 100k)	Staphylococcus aureus	Methicillin	Attributable	2007	85.841	121.28	50.4016	18.0813
Central Sub-Saharan Africa	Neonatal	Both sexes	Deaths	Rate (per 100k)	Staphylococcus aureus	Methicillin	Attributable	2008	65.5157	100.609	30.4219	17.905
Central Sub-Saharan Africa	Neonatal	Both sexes	Deaths	Rate (per 100k)	Staphylococcus aureus	Methicillin	Attributable	2009	66.5113	100.534	32.4885	17.3586
Central Sub-Saharan Africa	Neonatal	Both sexes	Deaths	Rate (per 100k)	Staphylococcus aureus	Methicillin	Attributable	2010	64.5375	94.9108	34.1643	15.4966
Central Sub-Saharan Africa	Neonatal	Both sexes	Deaths	Rate (per 100k)	Staphylococcus aureus	Methicillin	Attributable	2011	63.9429	93.9572	33.9287	15.3134
Central Sub-Saharan Africa	Neonatal	Both sexes	Deaths	Rate (per 100k)	Staphylococcus aureus	Methicillin	Attributable	2012	62.4418	90.0527	34.831	14.0872
Central Sub-Saharan Africa	Neonatal	Both sexes	Deaths	Rate (per 100k)	Staphylococcus aureus	Methicillin	Attributable	2013	61.9831	90.7472	33.219	14.6756
Central Sub-Saharan Africa	Neonatal	Both sexes	Deaths	Rate (per 100k)	Staphylococcus aureus	Methicillin	Attributable	2014	60.9724	90.0516	31.8932	14.8363
Central Sub-Saharan Africa	Neonatal	Both sexes	Deaths	Rate (per 100k)	Staphylococcus aureus	Methicillin	Attributable	2015	60.6382	89.3502	31.9263	14.6489
Central Sub-Saharan Africa	Neonatal	Both sexes	Deaths	Rate (per 100k)	Staphylococcus aureus	Methicillin	Attributable	2016	58.5225	87.7405	29.3046	14.9071
Central Sub-Saharan Africa	Neonatal	Both sexes	Deaths	Rate (per 100k)	Staphylococcus aureus	Methicillin	Attributable	2017	57.207	83.423	30.9909	13.3755
Central Sub-Saharan Africa	Neonatal	Both sexes	Deaths	Rate (per 100k)	Staphylococcus aureus	Methicillin	Attributable	2018	56.1363	89.2987	22.974	16.9195
Central Sub-Saharan Africa	Neonatal	Both sexes	Deaths	Rate (per 100k)	Staphylococcus aureus	Methicillin	Attributable	2019	54.0169	80.9942	27.0397	13.7639
Central Sub-Saharan Africa	Neonatal	Both sexes	Deaths	Rate (per 100k)	Staphylococcus aureus	Methicillin	Attributable	2020	51.1635	79.4357	22.8912	14.4246
Central Sub-Saharan Africa	Neonatal	Both sexes	Deaths	Rate (per 100k)	Staphylococcus aureus	Methicillin	Attributable	2021	49.5652	76.8972	22.2332	13.9449
Central Sub-Saharan Africa	Post Neonatal to 5	Both sexes	Deaths	Rate (per 100k)	Staphylococcus aureus	Methicillin	Attributable	1990	0.846246	1.39322	0.299273	0.279068
Central Sub-Saharan Africa	Post Neonatal to 5	Both sexes	Deaths	Rate (per 100k)	Staphylococcus aureus	Methicillin	Attributable	1991	0.854134	1.37921	0.329061	0.267894
Central Sub-Saharan Africa	Post Neonatal to 5	Both sexes	Deaths	Rate (per 100k)	Staphylococcus aureus	Methicillin	Attributable	1992	0.981821	1.54576	0.417878	0.287726
Central Sub-Saharan Africa	Post Neonatal to 5	Both sexes	Deaths	Rate (per 100k)	Staphylococcus aureus	Methicillin	Attributable	1993	0.974435	1.52642	0.422455	0.281623
Central Sub-Saharan Africa	Post Neonatal to 5	Both sexes	Deaths	Rate (per 100k)	Staphylococcus aureus	Methicillin	Attributable	1994	0.976362	1.51915	0.433577	0.276931
Central Sub-Saharan Africa	Post Neonatal to 5	Both sexes	Deaths	Rate (per 100k)	Staphylococcus aureus	Methicillin	Attributable	1995	0.997819	1.52819	0.46745	0.270597
Central Sub-Saharan Africa	Post Neonatal to 5	Both sexes	Deaths	Rate (per 100k)	Staphylococcus aureus	Methicillin	Attributable	1996	0.971405	1.49339	0.449422	0.266318
Central Sub-Saharan Africa	Post Neonatal to 5	Both sexes	Deaths	Rate (per 100k)	Staphylococcus aureus	Methicillin	Attributable	1997	1.00866	1.53338	0.48395	0.267711
Central Sub-Saharan Africa	Post Neonatal to 5	Both sexes	Deaths	Rate (per 100k)	Staphylococcus aureus	Methicillin	Attributable	1998	0.975065	1.48247	0.467656	0.258882
Central Sub-Saharan Africa	Post Neonatal to 5	Both sexes	Deaths	Rate (per 100k)	Staphylococcus aureus	Methicillin	Attributable	1999	0.951615	1.42909	0.474137	0.243611
Central Sub-Saharan Africa	Post Neonatal to 5	Both sexes	Deaths	Rate (per 100k)	Staphylococcus aureus	Methicillin	Attributable	2000	0.955576	1.43322	0.477931	0.243697
Central Sub-Saharan Africa	Post Neonatal to 5	Both sexes	Deaths	Rate (per 100k)	Staphylococcus aureus	Methicillin	Attributable	2001	0.916109	1.36072	0.471493	0.226845
Central Sub-Saharan Africa	Post Neonatal to 5	Both sexes	Deaths	Rate (per 100k)	Staphylococcus aureus	Methicillin	Attributable	2002	0.791635	1.21437	0.368897	0.215682
Central Sub-Saharan Africa	Post Neonatal to 5	Both sexes	Deaths	Rate (per 100k)	Staphylococcus aureus	Methicillin	Attributable	2003	0.81376	1.22854	0.398979	0.211623
Central Sub-Saharan Africa	Post Neonatal to 5	Both sexes	Deaths	Rate (per 100k)	Staphylococcus aureus	Methicillin	Attributable	2004	0.759744	1.13803	0.381458	0.193003
Central Sub-Saharan Africa	Post Neonatal to 5	Both sexes	Deaths	Rate (per 100k)	Staphylococcus aureus	Methicillin	Attributable	2005	0.733777	1.101	0.366552	0.18736
Central Sub-Saharan Africa	Post Neonatal to 5	Both sexes	Deaths	Rate (per 100k)	Staphylococcus aureus	Methicillin	Attributable	2006	0.796685	1.17549	0.417876	0.19327
Central Sub-Saharan Africa	Post Neonatal to 5	Both sexes	Deaths	Rate (per 100k)	Staphylococcus aureus	Methicillin	Attributable	2007	0.771969	1.13559	0.408349	0.185521
Central Sub-Saharan Africa	Post Neonatal to 5	Both sexes	Deaths	Rate (per 100k)	Staphylococcus aureus	Methicillin	Attributable	2008	0.577239	0.867969	0.28651	0.148331
Central Sub-Saharan Africa	Post Neonatal to 5	Both sexes	Deaths	Rate (per 100k)	Staphylococcus aureus	Methicillin	Attributable	2009	0.580938	0.862173	0.299703	0.143487
Central Sub-Saharan Africa	Post Neonatal to 5	Both sexes	Deaths	Rate (per 100k)	Staphylococcus aureus	Methicillin	Attributable	2010	0.559678	0.838126	0.28123	0.142065
Central Sub-Saharan Africa	Post Neonatal to 5	Both sexes	Deaths	Rate (per 100k)	Staphylococcus aureus	Methicillin	Attributable	2011	0.553391	0.836835	0.269947	0.144614
Central Sub-Saharan Africa	Post Neonatal to 5	Both sexes	Deaths	Rate (per 100k)	Staphylococcus aureus	Methicillin	Attributable	2012	0.546684	0.816334	0.277035	0.137576
Central Sub-Saharan Africa	Post Neonatal to 5	Both sexes	Deaths	Rate (per 100k)	Staphylococcus aureus	Methicillin	Attributable	2013	0.546856	0.826001	0.267711	0.142421
Central Sub-Saharan Africa	Post Neonatal to 5	Both sexes	Deaths	Rate (per 100k)	Staphylococcus aureus	Methicillin	Attributable	2014	0.543773	0.827133	0.260412	0.144572
Central Sub-Saharan Africa	Post Neonatal to 5	Both sexes	Deaths	Rate (per 100k)	Staphylococcus aureus	Methicillin	Attributable	2015	0.534363	0.830924	0.237802	0.151306
Central Sub-Saharan Africa	Post Neonatal to 5	Both sexes	Deaths	Rate (per 100k)	Staphylococcus aureus	Methicillin	Attributable	2016	0.500619	0.797626	0.203613	0.151534
Central Sub-Saharan Africa	Post Neonatal to 5	Both sexes	Deaths	Rate (per 100k)	Staphylococcus aureus	Methicillin	Attributable	2017	0.46551	0.735889	0.195131	0.137948
Central Sub-Saharan Africa	Post Neonatal to 5	Both sexes	Deaths	Rate (per 100k)	Staphylococcus aureus	Methicillin	Attributable	2018	0.440467	0.703959	0.176976	0.134435
Central Sub-Saharan Africa	Post Neonatal to 5	Both sexes	Deaths	Rate (per 100k)	Staphylococcus aureus	Methicillin	Attributable	2019	0.400725	0.645252	0.156198	0.124759
Central Sub-Saharan Africa	Post Neonatal to 5	Both sexes	Deaths	Rate (per 100k)	Staphylococcus aureus	Methicillin	Attributable	2020	0.366168	0.591739	0.140596	0.115087
Central Sub-Saharan Africa	Post Neonatal to 5	Both sexes	Deaths	Rate (per 100k)	Staphylococcus aureus	Methicillin	Attributable	2021	0.339294	0.55578	0.122807	0.110452
Central Sub-Saharan Africa	5 to 49	Both sexes	Deaths	Rate (per 100k)	Staphylococcus aureus	Methicillin	Attributable	1990	0.129261	0.202941	0.0555804	0.037592
Central Sub-Saharan Africa	5 to 49	Both sexes	Deaths	Rate (per 100k)	Staphylococcus aureus	Methicillin	Attributable	1991	0.133264	0.206182	0.0603454	0.0372033
Central Sub-Saharan Africa	5 to 49	Both sexes	Deaths	Rate (per 100k)	Staphylococcus aureus	Methicillin	Attributable	1992	0.152198	0.229504	0.0748918	0.039442
Central Sub-Saharan Africa	5 to 49	Both sexes	Deaths	Rate (per 100k)	Staphylococcus aureus	Methicillin	Attributable	1993	0.153375	0.231005	0.0757447	0.0396073
Central Sub-Saharan Africa	5 to 49	Both sexes	Deaths	Rate (per 100k)	Staphylococcus aureus	Methicillin	Attributable	1994	0.152964	0.226828	0.0790992	0.0376859
Central Sub-Saharan Africa	5 to 49	Both sexes	Deaths	Rate (per 100k)	Staphylococcus aureus	Methicillin	Attributable	1995	0.160198	0.235566	0.0848296	0.0384532
Central Sub-Saharan Africa	5 to 49	Both sexes	Deaths	Rate (per 100k)	Staphylococcus aureus	Methicillin	Attributable	1996	0.224517	0.337754	0.111279	0.0577743
Central Sub-Saharan Africa	5 to 49	Both sexes	Deaths	Rate (per 100k)	Staphylococcus aureus	Methicillin	Attributable	1997	0.217422	0.323988	0.110856	0.0543703
Central Sub-Saharan Africa	5 to 49	Both sexes	Deaths	Rate (per 100k)	Staphylococcus aureus	Methicillin	Attributable	1998	0.195535	0.283624	0.107446	0.0449433
Central Sub-Saharan Africa	5 to 49	Both sexes	Deaths	Rate (per 100k)	Staphylococcus aureus	Methicillin	Attributable	1999	0.191103	0.275528	0.106678	0.0430739
Central Sub-Saharan Africa	5 to 49	Both sexes	Deaths	Rate (per 100k)	Staphylococcus aureus	Methicillin	Attributable	2000	0.188034	0.270413	0.105656	0.04203
Central Sub-Saharan Africa	5 to 49	Both sexes	Deaths	Rate (per 100k)	Staphylococcus aureus	Methicillin	Attributable	2001	0.184914	0.264236	0.105592	0.0404706
Central Sub-Saharan Africa	5 to 49	Both sexes	Deaths	Rate (per 100k)	Staphylococcus aureus	Methicillin	Attributable	2002	0.174878	0.253503	0.0962527	0.0401148
Central Sub-Saharan Africa	5 to 49	Both sexes	Deaths	Rate (per 100k)	Staphylococcus aureus	Methicillin	Attributable	2003	0.184064	0.262222	0.105905	0.0398768
Central Sub-Saharan Africa	5 to 49	Both sexes	Deaths	Rate (per 100k)	Staphylococcus aureus	Methicillin	Attributable	2004	0.175786	0.249491	0.102081	0.0376048
Central Sub-Saharan Africa	5 to 49	Both sexes	Deaths	Rate (per 100k)	Staphylococcus aureus	Methicillin	Attributable	2005	0.17383	0.245839	0.101821	0.0367394
Central Sub-Saharan Africa	5 to 49	Both sexes	Deaths	Rate (per 100k)	Staphylococcus aureus	Methicillin	Attributable	2006	0.196114	0.273569	0.11866	0.0395175
Central Sub-Saharan Africa	5 to 49	Both sexes	Deaths	Rate (per 100k)	Staphylococcus aureus	Methicillin	Attributable	2007	0.1995	0.277246	0.121753	0.0396668
Central Sub-Saharan Africa	5 to 49	Both sexes	Deaths	Rate (per 100k)	Staphylococcus aureus	Methicillin	Attributable	2008	0.158683	0.228327	0.0890389	0.0355327
Central Sub-Saharan Africa	5 to 49	Both sexes	Deaths	Rate (per 100k)	Staphylococcus aureus	Methicillin	Attributable	2009	0.162965	0.232565	0.0933653	0.0355101
Central Sub-Saharan Africa	5 to 49	Both sexes	Deaths	Rate (per 100k)	Staphylococcus aureus	Methicillin	Attributable	2010	0.157297	0.225134	0.0894606	0.0346105
Central Sub-Saharan Africa	5 to 49	Both sexes	Deaths	Rate (per 100k)	Staphylococcus aureus	Methicillin	Attributable	2011	0.156892	0.223343	0.0904411	0.0339036
Central Sub-Saharan Africa	5 to 49	Both sexes	Deaths	Rate (per 100k)	Staphylococcus aureus	Methicillin	Attributable	2012	0.1573	0.223702	0.0908981	0.0338787
Central Sub-Saharan Africa	5 to 49	Both sexes	Deaths	Rate (per 100k)	Staphylococcus aureus	Methicillin	Attributable	2013	0.162497	0.233161	0.0918334	0.0360529
Central Sub-Saharan Africa	5 to 49	Both sexes	Deaths	Rate (per 100k)	Staphylococcus aureus	Methicillin	Attributable	2014	0.163743	0.233232	0.0942536	0.0354538
Central Sub-Saharan Africa	5 to 49	Both sexes	Deaths	Rate (per 100k)	Staphylococcus aureus	Methicillin	Attributable	2015	0.162118	0.232745	0.091491	0.0360342
Central Sub-Saharan Africa	5 to 49	Both sexes	Deaths	Rate (per 100k)	Staphylococcus aureus	Methicillin	Attributable	2016	0.160958	0.232244	0.0896732	0.03637
Central Sub-Saharan Africa	5 to 49	Both sexes	Deaths	Rate (per 100k)	Staphylococcus aureus	Methicillin	Attributable	2017	0.167828	0.240824	0.0948313	0.0372431
Central Sub-Saharan Africa	5 to 49	Both sexes	Deaths	Rate (per 100k)	Staphylococcus aureus	Methicillin	Attributable	2018	0.162524	0.235487	0.089561	0.0372261
Central Sub-Saharan Africa	5 to 49	Both sexes	Deaths	Rate (per 100k)	Staphylococcus aureus	Methicillin	Attributable	2019	0.161972	0.236133	0.0878115	0.0378371
Central Sub-Saharan Africa	5 to 49	Both sexes	Deaths	Rate (per 100k)	Staphylococcus aureus	Methicillin	Attributable	2020	0.159485	0.233694	0.0852755	0.0378618
Central Sub-Saharan Africa	5 to 49	Both sexes	Deaths	Rate (per 100k)	Staphylococcus aureus	Methicillin	Attributable	2021	0.162885	0.240791	0.0849786	0.0397481
Central Sub-Saharan Africa	50-69 years	Both sexes	Deaths	Rate (per 100k)	Staphylococcus aureus	Methicillin	Attributable	1990	1.71705	2.64647	0.787632	0.474193
Central Sub-Saharan Africa	50-69 years	Both sexes	Deaths	Rate (per 100k)	Staphylococcus aureus	Methicillin	Attributable	1991	1.75623	2.70525	0.807206	0.484195
Central Sub-Saharan Africa	50-69 years	Both sexes	Deaths	Rate (per 100k)	Staphylococcus aureus	Methicillin	Attributable	1992	2.01285	3.00443	1.02127	0.505908
Central Sub-Saharan Africa	50-69 years	Both sexes	Deaths	Rate (per 100k)	Staphylococcus aureus	Methicillin	Attributable	1993	2.01449	2.98462	1.04435	0.494966
Central Sub-Saharan Africa	50-69 years	Both sexes	Deaths	Rate (per 100k)	Staphylococcus aureus	Methicillin	Attributable	1994	2.06904	3.04601	1.09207	0.498453
Central Sub-Saharan Africa	50-69 years	Both sexes	Deaths	Rate (per 100k)	Staphylococcus aureus	Methicillin	Attributable	1995	2.17869	3.16598	1.1914	0.503719
Central Sub-Saharan Africa	50-69 years	Both sexes	Deaths	Rate (per 100k)	Staphylococcus aureus	Methicillin	Attributable	1996	2.31129	3.37087	1.25171	0.540602
Central Sub-Saharan Africa	50-69 years	Both sexes	Deaths	Rate (per 100k)	Staphylococcus aureus	Methicillin	Attributable	1997	2.3442	3.38918	1.29922	0.533152
Central Sub-Saharan Africa	50-69 years	Both sexes	Deaths	Rate (per 100k)	Staphylococcus aureus	Methicillin	Attributable	1998	2.30268	3.33297	1.27239	0.52566
Central Sub-Saharan Africa	50-69 years	Both sexes	Deaths	Rate (per 100k)	Staphylococcus aureus	Methicillin	Attributable	1999	2.30388	3.33696	1.27079	0.527084
Central Sub-Saharan Africa	50-69 years	Both sexes	Deaths	Rate (per 100k)	Staphylococcus aureus	Methicillin	Attributable	2000	2.33784	3.3702	1.30548	0.526712
Central Sub-Saharan Africa	50-69 years	Both sexes	Deaths	Rate (per 100k)	Staphylococcus aureus	Methicillin	Attributable	2001	2.2995	3.29521	1.3038	0.508014
Central Sub-Saharan Africa	50-69 years	Both sexes	Deaths	Rate (per 100k)	Staphylococcus aureus	Methicillin	Attributable	2002	2.01281	2.91361	1.112	0.459592
Central Sub-Saharan Africa	50-69 years	Both sexes	Deaths	Rate (per 100k)	Staphylococcus aureus	Methicillin	Attributable	2003	2.12287	3.04606	1.19967	0.471019
Central Sub-Saharan Africa	50-69 years	Both sexes	Deaths	Rate (per 100k)	Staphylococcus aureus	Methicillin	Attributable	2004	2.05108	2.94265	1.15951	0.454883
Central Sub-Saharan Africa	50-69 years	Both sexes	Deaths	Rate (per 100k)	Staphylococcus aureus	Methicillin	Attributable	2005	2.00734	2.86113	1.15355	0.435607
Central Sub-Saharan Africa	50-69 years	Both sexes	Deaths	Rate (per 100k)	Staphylococcus aureus	Methicillin	Attributable	2006	2.21004	3.09935	1.32074	0.453727
Central Sub-Saharan Africa	50-69 years	Both sexes	Deaths	Rate (per 100k)	Staphylococcus aureus	Methicillin	Attributable	2007	2.21746	3.07717	1.35775	0.438628
Central Sub-Saharan Africa	50-69 years	Both sexes	Deaths	Rate (per 100k)	Staphylococcus aureus	Methicillin	Attributable	2008	1.74223	2.50989	0.974558	0.391667
Central Sub-Saharan Africa	50-69 years	Both sexes	Deaths	Rate (per 100k)	Staphylococcus aureus	Methicillin	Attributable	2009	1.78463	2.54727	1.02198	0.389105
Central Sub-Saharan Africa	50-69 years	Both sexes	Deaths	Rate (per 100k)	Staphylococcus aureus	Methicillin	Attributable	2010	1.76731	2.53884	0.995775	0.39364
Central Sub-Saharan Africa	50-69 years	Both sexes	Deaths	Rate (per 100k)	Staphylococcus aureus	Methicillin	Attributable	2011	1.79852	2.57451	1.02252	0.395916
Central Sub-Saharan Africa	50-69 years	Both sexes	Deaths	Rate (per 100k)	Staphylococcus aureus	Methicillin	Attributable	2012	1.81372	2.60736	1.02007	0.404921
Central Sub-Saharan Africa	50-69 years	Both sexes	Deaths	Rate (per 100k)	Staphylococcus aureus	Methicillin	Attributable	2013	1.85783	2.6912	1.02446	0.425188
Central Sub-Saharan Africa	50-69 years	Both sexes	Deaths	Rate (per 100k)	Staphylococcus aureus	Methicillin	Attributable	2014	1.90193	2.73548	1.06838	0.42528
Central Sub-Saharan Africa	50-69 years	Both sexes	Deaths	Rate (per 100k)	Staphylococcus aureus	Methicillin	Attributable	2015	1.96372	2.83242	1.09502	0.443213
Central Sub-Saharan Africa	50-69 years	Both sexes	Deaths	Rate (per 100k)	Staphylococcus aureus	Methicillin	Attributable	2016	1.97465	2.87994	1.06935	0.461886
Central Sub-Saharan Africa	50-69 years	Both sexes	Deaths	Rate (per 100k)	Staphylococcus aureus	Methicillin	Attributable	2017	2.03258	2.95105	1.11411	0.468609
Central Sub-Saharan Africa	50-69 years	Both sexes	Deaths	Rate (per 100k)	Staphylococcus aureus	Methicillin	Attributable	2018	2.07287	3.01022	1.13551	0.478241
Central Sub-Saharan Africa	50-69 years	Both sexes	Deaths	Rate (per 100k)	Staphylococcus aureus	Methicillin	Attributable	2019	2.1062	3.05988	1.15251	0.486572
Central Sub-Saharan Africa	50-69 years	Both sexes	Deaths	Rate (per 100k)	Staphylococcus aureus	Methicillin	Attributable	2020	2.14886	3.15064	1.14709	0.51111
Central Sub-Saharan Africa	50-69 years	Both sexes	Deaths	Rate (per 100k)	Staphylococcus aureus	Methicillin	Attributable	2021	2.21302	3.25164	1.1744	0.529907
Central Sub-Saharan Africa	70+ years	Both sexes	Deaths	Rate (per 100k)	Staphylococcus aureus	Methicillin	Attributable	1990	8.02701	12.3815	3.67248	2.2217
Central Sub-Saharan Africa	70+ years	Both sexes	Deaths	Rate (per 100k)	Staphylococcus aureus	Methicillin	Attributable	1991	8.19548	12.4767	3.91429	2.18428
Central Sub-Saharan Africa	70+ years	Both sexes	Deaths	Rate (per 100k)	Staphylococcus aureus	Methicillin	Attributable	1992	9.44147	13.9294	4.95356	2.28975
Central Sub-Saharan Africa	70+ years	Both sexes	Deaths	Rate (per 100k)	Staphylococcus aureus	Methicillin	Attributable	1993	9.50171	14.0041	4.99932	2.29714
Central Sub-Saharan Africa	70+ years	Both sexes	Deaths	Rate (per 100k)	Staphylococcus aureus	Methicillin	Attributable	1994	9.82354	14.4136	5.23346	2.34188
Central Sub-Saharan Africa	70+ years	Both sexes	Deaths	Rate (per 100k)	Staphylococcus aureus	Methicillin	Attributable	1995	10.3202	14.981	5.65943	2.37795
Central Sub-Saharan Africa	70+ years	Both sexes	Deaths	Rate (per 100k)	Staphylococcus aureus	Methicillin	Attributable	1996	10.5604	15.265	5.85571	2.40034
Central Sub-Saharan Africa	70+ years	Both sexes	Deaths	Rate (per 100k)	Staphylococcus aureus	Methicillin	Attributable	1997	10.9108	15.7611	6.06051	2.47463
Central Sub-Saharan Africa	70+ years	Both sexes	Deaths	Rate (per 100k)	Staphylococcus aureus	Methicillin	Attributable	1998	10.8826	15.7682	5.99696	2.49267
Central Sub-Saharan Africa	70+ years	Both sexes	Deaths	Rate (per 100k)	Staphylococcus aureus	Methicillin	Attributable	1999	10.9416	15.7885	6.09464	2.47293
Central Sub-Saharan Africa	70+ years	Both sexes	Deaths	Rate (per 100k)	Staphylococcus aureus	Methicillin	Attributable	2000	11.1838	16.0011	6.36649	2.4578
Central Sub-Saharan Africa	70+ years	Both sexes	Deaths	Rate (per 100k)	Staphylococcus aureus	Methicillin	Attributable	2001	11.2116	15.9504	6.47281	2.41775
Central Sub-Saharan Africa	70+ years	Both sexes	Deaths	Rate (per 100k)	Staphylococcus aureus	Methicillin	Attributable	2002	9.91612	14.3375	5.49472	2.25582
Central Sub-Saharan Africa	70+ years	Both sexes	Deaths	Rate (per 100k)	Staphylococcus aureus	Methicillin	Attributable	2003	10.6097	15.1852	6.03417	2.33445
Central Sub-Saharan Africa	70+ years	Both sexes	Deaths	Rate (per 100k)	Staphylococcus aureus	Methicillin	Attributable	2004	10.4457	14.8099	6.08149	2.22664
Central Sub-Saharan Africa	70+ years	Both sexes	Deaths	Rate (per 100k)	Staphylococcus aureus	Methicillin	Attributable	2005	10.3974	14.7049	6.08993	2.19769
Central Sub-Saharan Africa	70+ years	Both sexes	Deaths	Rate (per 100k)	Staphylococcus aureus	Methicillin	Attributable	2006	11.6235	16.1416	7.10538	2.30516
Central Sub-Saharan Africa	70+ years	Both sexes	Deaths	Rate (per 100k)	Staphylococcus aureus	Methicillin	Attributable	2007	11.7485	16.3367	7.16033	2.3409
Central Sub-Saharan Africa	70+ years	Both sexes	Deaths	Rate (per 100k)	Staphylococcus aureus	Methicillin	Attributable	2008	9.21459	13.1482	5.281	2.00694
Central Sub-Saharan Africa	70+ years	Both sexes	Deaths	Rate (per 100k)	Staphylococcus aureus	Methicillin	Attributable	2009	9.5311	13.5499	5.51225	2.05043
Central Sub-Saharan Africa	70+ years	Both sexes	Deaths	Rate (per 100k)	Staphylococcus aureus	Methicillin	Attributable	2010	9.50913	13.5638	5.4545	2.06869
Central Sub-Saharan Africa	70+ years	Both sexes	Deaths	Rate (per 100k)	Staphylococcus aureus	Methicillin	Attributable	2011	9.74333	13.9126	5.57405	2.12718
Central Sub-Saharan Africa	70+ years	Both sexes	Deaths	Rate (per 100k)	Staphylococcus aureus	Methicillin	Attributable	2012	9.83366	14.0144	5.65287	2.13305
Central Sub-Saharan Africa	70+ years	Both sexes	Deaths	Rate (per 100k)	Staphylococcus aureus	Methicillin	Attributable	2013	10.0792	14.4622	5.69624	2.23622
Central Sub-Saharan Africa	70+ years	Both sexes	Deaths	Rate (per 100k)	Staphylococcus aureus	Methicillin	Attributable	2014	10.2889	14.7359	5.84189	2.26888
Central Sub-Saharan Africa	70+ years	Both sexes	Deaths	Rate (per 100k)	Staphylococcus aureus	Methicillin	Attributable	2015	10.7306	15.3516	6.10967	2.35764
Central Sub-Saharan Africa	70+ years	Both sexes	Deaths	Rate (per 100k)	Staphylococcus aureus	Methicillin	Attributable	2016	10.8024	15.5521	6.05268	2.42332
Central Sub-Saharan Africa	70+ years	Both sexes	Deaths	Rate (per 100k)	Staphylococcus aureus	Methicillin	Attributable	2017	11.1237	15.9672	6.28033	2.47113
Central Sub-Saharan Africa	70+ years	Both sexes	Deaths	Rate (per 100k)	Staphylococcus aureus	Methicillin	Attributable	2018	11.3907	16.3693	6.41208	2.54012
Central Sub-Saharan Africa	70+ years	Both sexes	Deaths	Rate (per 100k)	Staphylococcus aureus	Methicillin	Attributable	2019	11.6156	16.9003	6.33099	2.69625
Central Sub-Saharan Africa	70+ years	Both sexes	Deaths	Rate (per 100k)	Staphylococcus aureus	Methicillin	Attributable	2020	11.652	17.0333	6.27082	2.74552
Central Sub-Saharan Africa	70+ years	Both sexes	Deaths	Rate (per 100k)	Staphylococcus aureus	Methicillin	Attributable	2021	11.8036	17.208	6.39928	2.75733
Eastern Sub-Saharan Africa	Age-standardized	Both sexes	Deaths	Rate (per 100k)	Staphylococcus aureus	Methicillin	Attributable	1990	1.09304	1.83509	0.351	0.378594
Eastern Sub-Saharan Africa	Age-standardized	Both sexes	Deaths	Rate (per 100k)	Staphylococcus aureus	Methicillin	Attributable	1991	1.07675	1.79577	0.357737	0.366846
Eastern Sub-Saharan Africa	Age-standardized	Both sexes	Deaths	Rate (per 100k)	Staphylococcus aureus	Methicillin	Attributable	1992	1.10678	1.81326	0.400295	0.360451
Eastern Sub-Saharan Africa	Age-standardized	Both sexes	Deaths	Rate (per 100k)	Staphylococcus aureus	Methicillin	Attributable	1993	1.11405	1.80413	0.423966	0.352082
Eastern Sub-Saharan Africa	Age-standardized	Both sexes	Deaths	Rate (per 100k)	Staphylococcus aureus	Methicillin	Attributable	1994	1.43546	2.29562	0.575309	0.438855
Eastern Sub-Saharan Africa	Age-standardized	Both sexes	Deaths	Rate (per 100k)	Staphylococcus aureus	Methicillin	Attributable	1995	1.12487	1.78774	0.461988	0.338203
Eastern Sub-Saharan Africa	Age-standardized	Both sexes	Deaths	Rate (per 100k)	Staphylococcus aureus	Methicillin	Attributable	1996	1.11891	1.76861	0.469222	0.331475
Eastern Sub-Saharan Africa	Age-standardized	Both sexes	Deaths	Rate (per 100k)	Staphylococcus aureus	Methicillin	Attributable	1997	1.14181	1.79405	0.489566	0.332777
Eastern Sub-Saharan Africa	Age-standardized	Both sexes	Deaths	Rate (per 100k)	Staphylococcus aureus	Methicillin	Attributable	1998	1.1653	1.79514	0.53546	0.321346
Eastern Sub-Saharan Africa	Age-standardized	Both sexes	Deaths	Rate (per 100k)	Staphylococcus aureus	Methicillin	Attributable	1999	1.15211	1.77176	0.532468	0.316146
Eastern Sub-Saharan Africa	Age-standardized	Both sexes	Deaths	Rate (per 100k)	Staphylococcus aureus	Methicillin	Attributable	2000	1.17472	1.77649	0.572945	0.307028
Eastern Sub-Saharan Africa	Age-standardized	Both sexes	Deaths	Rate (per 100k)	Staphylococcus aureus	Methicillin	Attributable	2001	1.16514	1.74305	0.587231	0.294853
Eastern Sub-Saharan Africa	Age-standardized	Both sexes	Deaths	Rate (per 100k)	Staphylococcus aureus	Methicillin	Attributable	2002	1.19825	1.764	0.632491	0.28865
Eastern Sub-Saharan Africa	Age-standardized	Both sexes	Deaths	Rate (per 100k)	Staphylococcus aureus	Methicillin	Attributable	2003	1.25014	1.8117	0.688581	0.286511
Eastern Sub-Saharan Africa	Age-standardized	Both sexes	Deaths	Rate (per 100k)	Staphylococcus aureus	Methicillin	Attributable	2004	1.2526	1.78647	0.718732	0.272382
Eastern Sub-Saharan Africa	Age-standardized	Both sexes	Deaths	Rate (per 100k)	Staphylococcus aureus	Methicillin	Attributable	2005	1.3034	1.81067	0.796127	0.258812
Eastern Sub-Saharan Africa	Age-standardized	Both sexes	Deaths	Rate (per 100k)	Staphylococcus aureus	Methicillin	Attributable	2006	1.35806	1.85099	0.865135	0.251494
Eastern Sub-Saharan Africa	Age-standardized	Both sexes	Deaths	Rate (per 100k)	Staphylococcus aureus	Methicillin	Attributable	2007	1.38064	1.84265	0.918643	0.235715
Eastern Sub-Saharan Africa	Age-standardized	Both sexes	Deaths	Rate (per 100k)	Staphylococcus aureus	Methicillin	Attributable	2008	1.40961	1.86688	0.952339	0.233301
Eastern Sub-Saharan Africa	Age-standardized	Both sexes	Deaths	Rate (per 100k)	Staphylococcus aureus	Methicillin	Attributable	2009	1.40603	1.83986	0.972192	0.221344
Eastern Sub-Saharan Africa	Age-standardized	Both sexes	Deaths	Rate (per 100k)	Staphylococcus aureus	Methicillin	Attributable	2010	1.44391	1.8671	1.02072	0.215913
Eastern Sub-Saharan Africa	Age-standardized	Both sexes	Deaths	Rate (per 100k)	Staphylococcus aureus	Methicillin	Attributable	2011	1.61301	2.05172	1.17431	0.223829
Eastern Sub-Saharan Africa	Age-standardized	Both sexes	Deaths	Rate (per 100k)	Staphylococcus aureus	Methicillin	Attributable	2012	1.53899	1.92778	1.15021	0.198361
Eastern Sub-Saharan Africa	Age-standardized	Both sexes	Deaths	Rate (per 100k)	Staphylococcus aureus	Methicillin	Attributable	2013	1.50648	1.88022	1.13275	0.190679
Eastern Sub-Saharan Africa	Age-standardized	Both sexes	Deaths	Rate (per 100k)	Staphylococcus aureus	Methicillin	Attributable	2014	1.53275	1.89374	1.17176	0.18418
Eastern Sub-Saharan Africa	Age-standardized	Both sexes	Deaths	Rate (per 100k)	Staphylococcus aureus	Methicillin	Attributable	2015	1.51955	1.87296	1.16614	0.180311
Eastern Sub-Saharan Africa	Age-standardized	Both sexes	Deaths	Rate (per 100k)	Staphylococcus aureus	Methicillin	Attributable	2016	1.4864	1.85087	1.12193	0.185954
Eastern Sub-Saharan Africa	Age-standardized	Both sexes	Deaths	Rate (per 100k)	Staphylococcus aureus	Methicillin	Attributable	2017	1.45342	1.80967	1.09716	0.181762
Eastern Sub-Saharan Africa	Age-standardized	Both sexes	Deaths	Rate (per 100k)	Staphylococcus aureus	Methicillin	Attributable	2018	1.45318	1.82317	1.0832	0.188768
Eastern Sub-Saharan Africa	Age-standardized	Both sexes	Deaths	Rate (per 100k)	Staphylococcus aureus	Methicillin	Attributable	2019	1.41539	1.79442	1.03636	0.193383
Eastern Sub-Saharan Africa	Age-standardized	Both sexes	Deaths	Rate (per 100k)	Staphylococcus aureus	Methicillin	Attributable	2020	1.36221	1.76287	0.961557	0.204417
Eastern Sub-Saharan Africa	Age-standardized	Both sexes	Deaths	Rate (per 100k)	Staphylococcus aureus	Methicillin	Attributable	2021	1.36183	1.78094	0.94272	0.213831
Eastern Sub-Saharan Africa	Neonatal	Both sexes	Deaths	Rate (per 100k)	Staphylococcus aureus	Methicillin	Attributable	1990	75.578	126.077	25.0795	25.7646
Eastern Sub-Saharan Africa	Neonatal	Both sexes	Deaths	Rate (per 100k)	Staphylococcus aureus	Methicillin	Attributable	1991	74.3829	125.389	23.3771	26.0234
Eastern Sub-Saharan Africa	Neonatal	Both sexes	Deaths	Rate (per 100k)	Staphylococcus aureus	Methicillin	Attributable	1992	76.6816	125.358	28.0051	24.835
Eastern Sub-Saharan Africa	Neonatal	Both sexes	Deaths	Rate (per 100k)	Staphylococcus aureus	Methicillin	Attributable	1993	76.4154	126.227	26.6041	25.4139
Eastern Sub-Saharan Africa	Neonatal	Both sexes	Deaths	Rate (per 100k)	Staphylococcus aureus	Methicillin	Attributable	1994	76.6934	124.467	28.9196	24.3744
Eastern Sub-Saharan Africa	Neonatal	Both sexes	Deaths	Rate (per 100k)	Staphylococcus aureus	Methicillin	Attributable	1995	75.9538	121.498	30.4098	23.2367
Eastern Sub-Saharan Africa	Neonatal	Both sexes	Deaths	Rate (per 100k)	Staphylococcus aureus	Methicillin	Attributable	1996	75.2986	122.12	28.4778	23.8882
Eastern Sub-Saharan Africa	Neonatal	Both sexes	Deaths	Rate (per 100k)	Staphylococcus aureus	Methicillin	Attributable	1997	76.3917	123.987	28.796	24.2835
Eastern Sub-Saharan Africa	Neonatal	Both sexes	Deaths	Rate (per 100k)	Staphylococcus aureus	Methicillin	Attributable	1998	78.6427	122.03	35.2551	22.1366
Eastern Sub-Saharan Africa	Neonatal	Both sexes	Deaths	Rate (per 100k)	Staphylococcus aureus	Methicillin	Attributable	1999	77.0543	120.829	33.2795	22.3341
Eastern Sub-Saharan Africa	Neonatal	Both sexes	Deaths	Rate (per 100k)	Staphylococcus aureus	Methicillin	Attributable	2000	78.597	122.572	34.6221	22.4362
Eastern Sub-Saharan Africa	Neonatal	Both sexes	Deaths	Rate (per 100k)	Staphylococcus aureus	Methicillin	Attributable	2001	79.8427	119.717	39.968	20.3442
Eastern Sub-Saharan Africa	Neonatal	Both sexes	Deaths	Rate (per 100k)	Staphylococcus aureus	Methicillin	Attributable	2002	81.8641	121.67	42.0582	20.3091
Eastern Sub-Saharan Africa	Neonatal	Both sexes	Deaths	Rate (per 100k)	Staphylococcus aureus	Methicillin	Attributable	2003	85.6149	127.356	43.8735	21.2966
Eastern Sub-Saharan Africa	Neonatal	Both sexes	Deaths	Rate (per 100k)	Staphylococcus aureus	Methicillin	Attributable	2004	85.1103	126.305	43.9153	21.0178
Eastern Sub-Saharan Africa	Neonatal	Both sexes	Deaths	Rate (per 100k)	Staphylococcus aureus	Methicillin	Attributable	2005	89.0783	128.706	49.4509	20.218
Eastern Sub-Saharan Africa	Neonatal	Both sexes	Deaths	Rate (per 100k)	Staphylococcus aureus	Methicillin	Attributable	2006	94.6512	132.762	56.5403	19.4443
Eastern Sub-Saharan Africa	Neonatal	Both sexes	Deaths	Rate (per 100k)	Staphylococcus aureus	Methicillin	Attributable	2007	96.1606	130.915	61.4063	17.7318
Eastern Sub-Saharan Africa	Neonatal	Both sexes	Deaths	Rate (per 100k)	Staphylococcus aureus	Methicillin	Attributable	2008	96.9369	136.407	57.4665	20.138
Eastern Sub-Saharan Africa	Neonatal	Both sexes	Deaths	Rate (per 100k)	Staphylococcus aureus	Methicillin	Attributable	2009	93.7881	129.906	57.6703	18.4274
Eastern Sub-Saharan Africa	Neonatal	Both sexes	Deaths	Rate (per 100k)	Staphylococcus aureus	Methicillin	Attributable	2010	94.3239	126.88	61.7681	16.6101
Eastern Sub-Saharan Africa	Neonatal	Both sexes	Deaths	Rate (per 100k)	Staphylococcus aureus	Methicillin	Attributable	2011	101.337	134.634	68.0398	16.9883
Eastern Sub-Saharan Africa	Neonatal	Both sexes	Deaths	Rate (per 100k)	Staphylococcus aureus	Methicillin	Attributable	2012	98.5751	127.963	69.1873	14.9937
Eastern Sub-Saharan Africa	Neonatal	Both sexes	Deaths	Rate (per 100k)	Staphylococcus aureus	Methicillin	Attributable	2013	95.781	126.293	65.2693	15.5672
Eastern Sub-Saharan Africa	Neonatal	Both sexes	Deaths	Rate (per 100k)	Staphylococcus aureus	Methicillin	Attributable	2014	96.3573	125.38	67.335	14.8073
Eastern Sub-Saharan Africa	Neonatal	Both sexes	Deaths	Rate (per 100k)	Staphylococcus aureus	Methicillin	Attributable	2015	92.8053	121.075	64.536	14.4231
Eastern Sub-Saharan Africa	Neonatal	Both sexes	Deaths	Rate (per 100k)	Staphylococcus aureus	Methicillin	Attributable	2016	88.0875	114.441	61.7338	13.4457
Eastern Sub-Saharan Africa	Neonatal	Both sexes	Deaths	Rate (per 100k)	Staphylococcus aureus	Methicillin	Attributable	2017	83.0223	107.596	58.4486	12.5376
Eastern Sub-Saharan Africa	Neonatal	Both sexes	Deaths	Rate (per 100k)	Staphylococcus aureus	Methicillin	Attributable	2018	80.0319	109.051	51.0124	14.8059
Eastern Sub-Saharan Africa	Neonatal	Both sexes	Deaths	Rate (per 100k)	Staphylococcus aureus	Methicillin	Attributable	2019	75.8609	102.582	49.1397	13.6332
Eastern Sub-Saharan Africa	Neonatal	Both sexes	Deaths	Rate (per 100k)	Staphylococcus aureus	Methicillin	Attributable	2020	71.8857	101.339	42.4329	15.0269
Eastern Sub-Saharan Africa	Neonatal	Both sexes	Deaths	Rate (per 100k)	Staphylococcus aureus	Methicillin	Attributable	2021	70.4603	99.7565	41.1642	14.947
Eastern Sub-Saharan Africa	Post Neonatal to 5	Both sexes	Deaths	Rate (per 100k)	Staphylococcus aureus	Methicillin	Attributable	1990	1.03056	1.76505	0.296063	0.374741
Eastern Sub-Saharan Africa	Post Neonatal to 5	Both sexes	Deaths	Rate (per 100k)	Staphylococcus aureus	Methicillin	Attributable	1991	1.00513	1.70209	0.308174	0.355592
Eastern Sub-Saharan Africa	Post Neonatal to 5	Both sexes	Deaths	Rate (per 100k)	Staphylococcus aureus	Methicillin	Attributable	1992	1.03256	1.72863	0.336488	0.355139
Eastern Sub-Saharan Africa	Post Neonatal to 5	Both sexes	Deaths	Rate (per 100k)	Staphylococcus aureus	Methicillin	Attributable	1993	1.02017	1.67844	0.361893	0.335854
Eastern Sub-Saharan Africa	Post Neonatal to 5	Both sexes	Deaths	Rate (per 100k)	Staphylococcus aureus	Methicillin	Attributable	1994	1.03098	1.68753	0.374424	0.334976
Eastern Sub-Saharan Africa	Post Neonatal to 5	Both sexes	Deaths	Rate (per 100k)	Staphylococcus aureus	Methicillin	Attributable	1995	0.985814	1.59122	0.380413	0.308878
Eastern Sub-Saharan Africa	Post Neonatal to 5	Both sexes	Deaths	Rate (per 100k)	Staphylococcus aureus	Methicillin	Attributable	1996	0.943568	1.51785	0.369282	0.293003
Eastern Sub-Saharan Africa	Post Neonatal to 5	Both sexes	Deaths	Rate (per 100k)	Staphylococcus aureus	Methicillin	Attributable	1997	0.918504	1.47291	0.3641	0.282859
Eastern Sub-Saharan Africa	Post Neonatal to 5	Both sexes	Deaths	Rate (per 100k)	Staphylococcus aureus	Methicillin	Attributable	1998	0.909055	1.42649	0.391621	0.263997
Eastern Sub-Saharan Africa	Post Neonatal to 5	Both sexes	Deaths	Rate (per 100k)	Staphylococcus aureus	Methicillin	Attributable	1999	0.865323	1.3513	0.379347	0.247947
Eastern Sub-Saharan Africa	Post Neonatal to 5	Both sexes	Deaths	Rate (per 100k)	Staphylococcus aureus	Methicillin	Attributable	2000	0.861622	1.3257	0.397546	0.236773
Eastern Sub-Saharan Africa	Post Neonatal to 5	Both sexes	Deaths	Rate (per 100k)	Staphylococcus aureus	Methicillin	Attributable	2001	0.840899	1.27521	0.406585	0.221589
Eastern Sub-Saharan Africa	Post Neonatal to 5	Both sexes	Deaths	Rate (per 100k)	Staphylococcus aureus	Methicillin	Attributable	2002	0.834209	1.26936	0.399058	0.222016
Eastern Sub-Saharan Africa	Post Neonatal to 5	Both sexes	Deaths	Rate (per 100k)	Staphylococcus aureus	Methicillin	Attributable	2003	0.84058	1.24455	0.436609	0.206108
Eastern Sub-Saharan Africa	Post Neonatal to 5	Both sexes	Deaths	Rate (per 100k)	Staphylococcus aureus	Methicillin	Attributable	2004	0.816834	1.19624	0.437427	0.193575
Eastern Sub-Saharan Africa	Post Neonatal to 5	Both sexes	Deaths	Rate (per 100k)	Staphylococcus aureus	Methicillin	Attributable	2005	0.835476	1.18571	0.485239	0.178693
Eastern Sub-Saharan Africa	Post Neonatal to 5	Both sexes	Deaths	Rate (per 100k)	Staphylococcus aureus	Methicillin	Attributable	2006	0.860061	1.20881	0.511313	0.177933
Eastern Sub-Saharan Africa	Post Neonatal to 5	Both sexes	Deaths	Rate (per 100k)	Staphylococcus aureus	Methicillin	Attributable	2007	0.862614	1.18504	0.540185	0.164505
Eastern Sub-Saharan Africa	Post Neonatal to 5	Both sexes	Deaths	Rate (per 100k)	Staphylococcus aureus	Methicillin	Attributable	2008	0.859999	1.17279	0.547208	0.159587
Eastern Sub-Saharan Africa	Post Neonatal to 5	Both sexes	Deaths	Rate (per 100k)	Staphylococcus aureus	Methicillin	Attributable	2009	0.826182	1.11073	0.541631	0.145179
Eastern Sub-Saharan Africa	Post Neonatal to 5	Both sexes	Deaths	Rate (per 100k)	Staphylococcus aureus	Methicillin	Attributable	2010	0.845358	1.13688	0.553832	0.148738
Eastern Sub-Saharan Africa	Post Neonatal to 5	Both sexes	Deaths	Rate (per 100k)	Staphylococcus aureus	Methicillin	Attributable	2011	1.02249	1.36977	0.675217	0.177181
Eastern Sub-Saharan Africa	Post Neonatal to 5	Both sexes	Deaths	Rate (per 100k)	Staphylococcus aureus	Methicillin	Attributable	2012	0.878031	1.15723	0.598832	0.142448
Eastern Sub-Saharan Africa	Post Neonatal to 5	Both sexes	Deaths	Rate (per 100k)	Staphylococcus aureus	Methicillin	Attributable	2013	0.831336	1.0963	0.566369	0.135187
Eastern Sub-Saharan Africa	Post Neonatal to 5	Both sexes	Deaths	Rate (per 100k)	Staphylococcus aureus	Methicillin	Attributable	2014	0.853981	1.11054	0.597421	0.130898
Eastern Sub-Saharan Africa	Post Neonatal to 5	Both sexes	Deaths	Rate (per 100k)	Staphylococcus aureus	Methicillin	Attributable	2015	0.82132	1.08715	0.555489	0.135628
Eastern Sub-Saharan Africa	Post Neonatal to 5	Both sexes	Deaths	Rate (per 100k)	Staphylococcus aureus	Methicillin	Attributable	2016	0.77733	1.04339	0.511273	0.135743
Eastern Sub-Saharan Africa	Post Neonatal to 5	Both sexes	Deaths	Rate (per 100k)	Staphylococcus aureus	Methicillin	Attributable	2017	0.725436	0.973703	0.477169	0.126667
Eastern Sub-Saharan Africa	Post Neonatal to 5	Both sexes	Deaths	Rate (per 100k)	Staphylococcus aureus	Methicillin	Attributable	2018	0.690954	0.946549	0.435359	0.130406
Eastern Sub-Saharan Africa	Post Neonatal to 5	Both sexes	Deaths	Rate (per 100k)	Staphylococcus aureus	Methicillin	Attributable	2019	0.646146	0.895611	0.396682	0.127278
Eastern Sub-Saharan Africa	Post Neonatal to 5	Both sexes	Deaths	Rate (per 100k)	Staphylococcus aureus	Methicillin	Attributable	2020	0.571255	0.807246	0.335265	0.120403
Eastern Sub-Saharan Africa	Post Neonatal to 5	Both sexes	Deaths	Rate (per 100k)	Staphylococcus aureus	Methicillin	Attributable	2021	0.544134	0.794507	0.29376	0.127742
Eastern Sub-Saharan Africa	5 to 49	Both sexes	Deaths	Rate (per 100k)	Staphylococcus aureus	Methicillin	Attributable	1990	0.168503	0.286855	0.0501504	0.0603838
Eastern Sub-Saharan Africa	5 to 49	Both sexes	Deaths	Rate (per 100k)	Staphylococcus aureus	Methicillin	Attributable	1991	0.156255	0.258985	0.0535244	0.0524133
Eastern Sub-Saharan Africa	5 to 49	Both sexes	Deaths	Rate (per 100k)	Staphylococcus aureus	Methicillin	Attributable	1992	0.150939	0.247814	0.0540653	0.0494256
Eastern Sub-Saharan Africa	5 to 49	Both sexes	Deaths	Rate (per 100k)	Staphylococcus aureus	Methicillin	Attributable	1993	0.15021	0.242935	0.057485	0.0473086
Eastern Sub-Saharan Africa	5 to 49	Both sexes	Deaths	Rate (per 100k)	Staphylococcus aureus	Methicillin	Attributable	1994	0.525878	0.917722	0.134033	0.199921
Eastern Sub-Saharan Africa	5 to 49	Both sexes	Deaths	Rate (per 100k)	Staphylococcus aureus	Methicillin	Attributable	1995	0.154657	0.246761	0.062554	0.0469915
Eastern Sub-Saharan Africa	5 to 49	Both sexes	Deaths	Rate (per 100k)	Staphylococcus aureus	Methicillin	Attributable	1996	0.151509	0.240691	0.0623271	0.0455011
Eastern Sub-Saharan Africa	5 to 49	Both sexes	Deaths	Rate (per 100k)	Staphylococcus aureus	Methicillin	Attributable	1997	0.160707	0.253442	0.067973	0.0473134
Eastern Sub-Saharan Africa	5 to 49	Both sexes	Deaths	Rate (per 100k)	Staphylococcus aureus	Methicillin	Attributable	1998	0.160629	0.247094	0.0741652	0.0441144
Eastern Sub-Saharan Africa	5 to 49	Both sexes	Deaths	Rate (per 100k)	Staphylococcus aureus	Methicillin	Attributable	1999	0.166806	0.26456	0.0690522	0.0498744
Eastern Sub-Saharan Africa	5 to 49	Both sexes	Deaths	Rate (per 100k)	Staphylococcus aureus	Methicillin	Attributable	2000	0.171482	0.259151	0.0838131	0.0447292
Eastern Sub-Saharan Africa	5 to 49	Both sexes	Deaths	Rate (per 100k)	Staphylococcus aureus	Methicillin	Attributable	2001	0.154835	0.232609	0.0770615	0.0396805
Eastern Sub-Saharan Africa	5 to 49	Both sexes	Deaths	Rate (per 100k)	Staphylococcus aureus	Methicillin	Attributable	2002	0.156328	0.23232	0.0803364	0.0387713
Eastern Sub-Saharan Africa	5 to 49	Both sexes	Deaths	Rate (per 100k)	Staphylococcus aureus	Methicillin	Attributable	2003	0.162447	0.235093	0.0898013	0.0370643
Eastern Sub-Saharan Africa	5 to 49	Both sexes	Deaths	Rate (per 100k)	Staphylococcus aureus	Methicillin	Attributable	2004	0.160902	0.229916	0.0918872	0.0352115
Eastern Sub-Saharan Africa	5 to 49	Both sexes	Deaths	Rate (per 100k)	Staphylococcus aureus	Methicillin	Attributable	2005	0.164223	0.228646	0.0997997	0.0328691
Eastern Sub-Saharan Africa	5 to 49	Both sexes	Deaths	Rate (per 100k)	Staphylococcus aureus	Methicillin	Attributable	2006	0.166203	0.227124	0.105281	0.0310824
Eastern Sub-Saharan Africa	5 to 49	Both sexes	Deaths	Rate (per 100k)	Staphylococcus aureus	Methicillin	Attributable	2007	0.167845	0.22505	0.11064	0.029186
Eastern Sub-Saharan Africa	5 to 49	Both sexes	Deaths	Rate (per 100k)	Staphylococcus aureus	Methicillin	Attributable	2008	0.168891	0.224975	0.112807	0.0286144
Eastern Sub-Saharan Africa	5 to 49	Both sexes	Deaths	Rate (per 100k)	Staphylococcus aureus	Methicillin	Attributable	2009	0.167884	0.221399	0.114369	0.0273035
Eastern Sub-Saharan Africa	5 to 49	Both sexes	Deaths	Rate (per 100k)	Staphylococcus aureus	Methicillin	Attributable	2010	0.170566	0.222411	0.118721	0.0264515
Eastern Sub-Saharan Africa	5 to 49	Both sexes	Deaths	Rate (per 100k)	Staphylococcus aureus	Methicillin	Attributable	2011	0.205538	0.26644	0.144636	0.0310725
Eastern Sub-Saharan Africa	5 to 49	Both sexes	Deaths	Rate (per 100k)	Staphylococcus aureus	Methicillin	Attributable	2012	0.177423	0.225744	0.129102	0.0246536
Eastern Sub-Saharan Africa	5 to 49	Both sexes	Deaths	Rate (per 100k)	Staphylococcus aureus	Methicillin	Attributable	2013	0.170355	0.217107	0.123603	0.0238531
Eastern Sub-Saharan Africa	5 to 49	Both sexes	Deaths	Rate (per 100k)	Staphylococcus aureus	Methicillin	Attributable	2014	0.173521	0.217905	0.129138	0.0226446
Eastern Sub-Saharan Africa	5 to 49	Both sexes	Deaths	Rate (per 100k)	Staphylococcus aureus	Methicillin	Attributable	2015	0.171234	0.216357	0.126111	0.023022
Eastern Sub-Saharan Africa	5 to 49	Both sexes	Deaths	Rate (per 100k)	Staphylococcus aureus	Methicillin	Attributable	2016	0.167937	0.214555	0.121318	0.0237849
Eastern Sub-Saharan Africa	5 to 49	Both sexes	Deaths	Rate (per 100k)	Staphylococcus aureus	Methicillin	Attributable	2017	0.166563	0.213607	0.11952	0.0240018
Eastern Sub-Saharan Africa	5 to 49	Both sexes	Deaths	Rate (per 100k)	Staphylococcus aureus	Methicillin	Attributable	2018	0.166794	0.215871	0.117717	0.0250392
Eastern Sub-Saharan Africa	5 to 49	Both sexes	Deaths	Rate (per 100k)	Staphylococcus aureus	Methicillin	Attributable	2019	0.16279	0.212242	0.113338	0.0252306
Eastern Sub-Saharan Africa	5 to 49	Both sexes	Deaths	Rate (per 100k)	Staphylococcus aureus	Methicillin	Attributable	2020	0.159458	0.211217	0.1077	0.0264074
Eastern Sub-Saharan Africa	5 to 49	Both sexes	Deaths	Rate (per 100k)	Staphylococcus aureus	Methicillin	Attributable	2021	0.162758	0.219138	0.106379	0.0287649
Eastern Sub-Saharan Africa	50-69 years	Both sexes	Deaths	Rate (per 100k)	Staphylococcus aureus	Methicillin	Attributable	1990	1.64932	2.76311	0.535538	0.568259
Eastern Sub-Saharan Africa	50-69 years	Both sexes	Deaths	Rate (per 100k)	Staphylococcus aureus	Methicillin	Attributable	1991	1.6276	2.7271	0.528109	0.560966
Eastern Sub-Saharan Africa	50-69 years	Both sexes	Deaths	Rate (per 100k)	Staphylococcus aureus	Methicillin	Attributable	1992	1.68697	2.76654	0.607399	0.5508
Eastern Sub-Saharan Africa	50-69 years	Both sexes	Deaths	Rate (per 100k)	Staphylococcus aureus	Methicillin	Attributable	1993	1.70213	2.75135	0.652917	0.535315
Eastern Sub-Saharan Africa	50-69 years	Both sexes	Deaths	Rate (per 100k)	Staphylococcus aureus	Methicillin	Attributable	1994	2.15749	3.44384	0.87115	0.656298
Eastern Sub-Saharan Africa	50-69 years	Both sexes	Deaths	Rate (per 100k)	Staphylococcus aureus	Methicillin	Attributable	1995	1.69972	2.70935	0.690097	0.515115
Eastern Sub-Saharan Africa	50-69 years	Both sexes	Deaths	Rate (per 100k)	Staphylococcus aureus	Methicillin	Attributable	1996	1.69062	2.681	0.700228	0.5053
Eastern Sub-Saharan Africa	50-69 years	Both sexes	Deaths	Rate (per 100k)	Staphylococcus aureus	Methicillin	Attributable	1997	1.73596	2.72808	0.743834	0.506185
Eastern Sub-Saharan Africa	50-69 years	Both sexes	Deaths	Rate (per 100k)	Staphylococcus aureus	Methicillin	Attributable	1998	1.77603	2.73411	0.81795	0.488817
Eastern Sub-Saharan Africa	50-69 years	Both sexes	Deaths	Rate (per 100k)	Staphylococcus aureus	Methicillin	Attributable	1999	1.74917	2.70064	0.797689	0.485448
Eastern Sub-Saharan Africa	50-69 years	Both sexes	Deaths	Rate (per 100k)	Staphylococcus aureus	Methicillin	Attributable	2000	1.78557	2.71171	0.859429	0.47252
Eastern Sub-Saharan Africa	50-69 years	Both sexes	Deaths	Rate (per 100k)	Staphylococcus aureus	Methicillin	Attributable	2001	1.75697	2.65586	0.858081	0.458617
Eastern Sub-Saharan Africa	50-69 years	Both sexes	Deaths	Rate (per 100k)	Staphylococcus aureus	Methicillin	Attributable	2002	1.7866	2.63991	0.933292	0.435361
Eastern Sub-Saharan Africa	50-69 years	Both sexes	Deaths	Rate (per 100k)	Staphylococcus aureus	Methicillin	Attributable	2003	1.86202	2.70986	1.01417	0.432574
Eastern Sub-Saharan Africa	50-69 years	Both sexes	Deaths	Rate (per 100k)	Staphylococcus aureus	Methicillin	Attributable	2004	1.85422	2.65576	1.05269	0.408947
Eastern Sub-Saharan Africa	50-69 years	Both sexes	Deaths	Rate (per 100k)	Staphylococcus aureus	Methicillin	Attributable	2005	1.91839	2.66949	1.1673	0.383212
Eastern Sub-Saharan Africa	50-69 years	Both sexes	Deaths	Rate (per 100k)	Staphylococcus aureus	Methicillin	Attributable	2006	1.98447	2.71552	1.25342	0.372986
Eastern Sub-Saharan Africa	50-69 years	Both sexes	Deaths	Rate (per 100k)	Staphylococcus aureus	Methicillin	Attributable	2007	2.01231	2.6786	1.34602	0.339943
Eastern Sub-Saharan Africa	50-69 years	Both sexes	Deaths	Rate (per 100k)	Staphylococcus aureus	Methicillin	Attributable	2008	2.04023	2.72028	1.36017	0.346968
Eastern Sub-Saharan Africa	50-69 years	Both sexes	Deaths	Rate (per 100k)	Staphylococcus aureus	Methicillin	Attributable	2009	2.03777	2.66484	1.41069	0.319937
Eastern Sub-Saharan Africa	50-69 years	Both sexes	Deaths	Rate (per 100k)	Staphylococcus aureus	Methicillin	Attributable	2010	2.07512	2.69503	1.45521	0.316282
Eastern Sub-Saharan Africa	50-69 years	Both sexes	Deaths	Rate (per 100k)	Staphylococcus aureus	Methicillin	Attributable	2011	2.40893	3.08982	1.72803	0.347394
Eastern Sub-Saharan Africa	50-69 years	Both sexes	Deaths	Rate (per 100k)	Staphylococcus aureus	Methicillin	Attributable	2012	2.18553	2.77077	1.6003	0.298588
Eastern Sub-Saharan Africa	50-69 years	Both sexes	Deaths	Rate (per 100k)	Staphylococcus aureus	Methicillin	Attributable	2013	2.13881	2.69636	1.58126	0.284463
Eastern Sub-Saharan Africa	50-69 years	Both sexes	Deaths	Rate (per 100k)	Staphylococcus aureus	Methicillin	Attributable	2014	2.16778	2.68686	1.6487	0.264836
Eastern Sub-Saharan Africa	50-69 years	Both sexes	Deaths	Rate (per 100k)	Staphylococcus aureus	Methicillin	Attributable	2015	2.14727	2.67148	1.62306	0.267456
Eastern Sub-Saharan Africa	50-69 years	Both sexes	Deaths	Rate (per 100k)	Staphylococcus aureus	Methicillin	Attributable	2016	2.10506	2.65672	1.5534	0.281458
Eastern Sub-Saharan Africa	50-69 years	Both sexes	Deaths	Rate (per 100k)	Staphylococcus aureus	Methicillin	Attributable	2017	2.0745	2.61957	1.52944	0.278094
Eastern Sub-Saharan Africa	50-69 years	Both sexes	Deaths	Rate (per 100k)	Staphylococcus aureus	Methicillin	Attributable	2018	2.08185	2.62699	1.53671	0.278135
Eastern Sub-Saharan Africa	50-69 years	Both sexes	Deaths	Rate (per 100k)	Staphylococcus aureus	Methicillin	Attributable	2019	2.03017	2.58136	1.47897	0.281222
Eastern Sub-Saharan Africa	50-69 years	Both sexes	Deaths	Rate (per 100k)	Staphylococcus aureus	Methicillin	Attributable	2020	1.98829	2.58037	1.39622	0.302079
Eastern Sub-Saharan Africa	50-69 years	Both sexes	Deaths	Rate (per 100k)	Staphylococcus aureus	Methicillin	Attributable	2021	1.99104	2.61887	1.36321	0.320322
Eastern Sub-Saharan Africa	70+ years	Both sexes	Deaths	Rate (per 100k)	Staphylococcus aureus	Methicillin	Attributable	1990	6.95268	11.7174	2.18798	2.43097
Eastern Sub-Saharan Africa	70+ years	Both sexes	Deaths	Rate (per 100k)	Staphylococcus aureus	Methicillin	Attributable	1991	6.93516	11.5588	2.31151	2.35901
Eastern Sub-Saharan Africa	70+ years	Both sexes	Deaths	Rate (per 100k)	Staphylococcus aureus	Methicillin	Attributable	1992	7.1969	11.7908	2.60305	2.3438
Eastern Sub-Saharan Africa	70+ years	Both sexes	Deaths	Rate (per 100k)	Staphylococcus aureus	Methicillin	Attributable	1993	7.30453	11.8424	2.76665	2.31525
Eastern Sub-Saharan Africa	70+ years	Both sexes	Deaths	Rate (per 100k)	Staphylococcus aureus	Methicillin	Attributable	1994	7.82447	12.5319	3.11706	2.40174
Eastern Sub-Saharan Africa	70+ years	Both sexes	Deaths	Rate (per 100k)	Staphylococcus aureus	Methicillin	Attributable	1995	7.52383	11.9537	3.09399	2.26012
Eastern Sub-Saharan Africa	70+ years	Both sexes	Deaths	Rate (per 100k)	Staphylococcus aureus	Methicillin	Attributable	1996	7.56373	11.9103	3.21719	2.21762
Eastern Sub-Saharan Africa	70+ years	Both sexes	Deaths	Rate (per 100k)	Staphylococcus aureus	Methicillin	Attributable	1997	7.71436	12.0709	3.3578	2.22273
Eastern Sub-Saharan Africa	70+ years	Both sexes	Deaths	Rate (per 100k)	Staphylococcus aureus	Methicillin	Attributable	1998	7.91608	12.2584	3.57374	2.21548
Eastern Sub-Saharan Africa	70+ years	Both sexes	Deaths	Rate (per 100k)	Staphylococcus aureus	Methicillin	Attributable	1999	7.82976	12.0208	3.63873	2.13828
Eastern Sub-Saharan Africa	70+ years	Both sexes	Deaths	Rate (per 100k)	Staphylococcus aureus	Methicillin	Attributable	2000	8.02532	12.1107	3.9399	2.0844
Eastern Sub-Saharan Africa	70+ years	Both sexes	Deaths	Rate (per 100k)	Staphylococcus aureus	Methicillin	Attributable	2001	8.07615	12.0676	4.08474	2.03644
Eastern Sub-Saharan Africa	70+ years	Both sexes	Deaths	Rate (per 100k)	Staphylococcus aureus	Methicillin	Attributable	2002	8.38985	12.3566	4.42305	2.02388
Eastern Sub-Saharan Africa	70+ years	Both sexes	Deaths	Rate (per 100k)	Staphylococcus aureus	Methicillin	Attributable	2003	8.78159	12.7315	4.83164	2.01528
Eastern Sub-Saharan Africa	70+ years	Both sexes	Deaths	Rate (per 100k)	Staphylococcus aureus	Methicillin	Attributable	2004	8.86234	12.583	5.14168	1.89829
Eastern Sub-Saharan Africa	70+ years	Both sexes	Deaths	Rate (per 100k)	Staphylococcus aureus	Methicillin	Attributable	2005	9.2489	12.8174	5.68037	1.82068
Eastern Sub-Saharan Africa	70+ years	Both sexes	Deaths	Rate (per 100k)	Staphylococcus aureus	Methicillin	Attributable	2006	9.71943	13.2474	6.19148	1.79998
Eastern Sub-Saharan Africa	70+ years	Both sexes	Deaths	Rate (per 100k)	Staphylococcus aureus	Methicillin	Attributable	2007	9.90963	13.3005	6.51874	1.73005
Eastern Sub-Saharan Africa	70+ years	Both sexes	Deaths	Rate (per 100k)	Staphylococcus aureus	Methicillin	Attributable	2008	10.2243	13.4378	7.01073	1.63956
Eastern Sub-Saharan Africa	70+ years	Both sexes	Deaths	Rate (per 100k)	Staphylococcus aureus	Methicillin	Attributable	2009	10.2715	13.3928	7.15019	1.5925
Eastern Sub-Saharan Africa	70+ years	Both sexes	Deaths	Rate (per 100k)	Staphylococcus aureus	Methicillin	Attributable	2010	10.6411	13.7222	7.55987	1.57204
Eastern Sub-Saharan Africa	70+ years	Both sexes	Deaths	Rate (per 100k)	Staphylococcus aureus	Methicillin	Attributable	2011	11.6026	14.6899	8.51521	1.57519
Eastern Sub-Saharan Africa	70+ years	Both sexes	Deaths	Rate (per 100k)	Staphylococcus aureus	Methicillin	Attributable	2012	11.5555	14.438	8.67304	1.47065
Eastern Sub-Saharan Africa	70+ years	Both sexes	Deaths	Rate (per 100k)	Staphylococcus aureus	Methicillin	Attributable	2013	11.4241	14.1662	8.68195	1.39905
Eastern Sub-Saharan Africa	70+ years	Both sexes	Deaths	Rate (per 100k)	Staphylococcus aureus	Methicillin	Attributable	2014	11.671	14.3667	8.97529	1.37536
Eastern Sub-Saharan Africa	70+ years	Both sexes	Deaths	Rate (per 100k)	Staphylococcus aureus	Methicillin	Attributable	2015	11.6711	14.2909	9.05131	1.33664
Eastern Sub-Saharan Africa	70+ years	Both sexes	Deaths	Rate (per 100k)	Staphylococcus aureus	Methicillin	Attributable	2016	11.5145	14.2231	8.80597	1.38191
Eastern Sub-Saharan Africa	70+ years	Both sexes	Deaths	Rate (per 100k)	Staphylococcus aureus	Methicillin	Attributable	2017	11.3394	14.0177	8.66109	1.36648
Eastern Sub-Saharan Africa	70+ years	Both sexes	Deaths	Rate (per 100k)	Staphylococcus aureus	Methicillin	Attributable	2018	11.4341	14.1519	8.71634	1.38663
Eastern Sub-Saharan Africa	70+ years	Both sexes	Deaths	Rate (per 100k)	Staphylococcus aureus	Methicillin	Attributable	2019	11.2312	14.1306	8.33191	1.47925
Eastern Sub-Saharan Africa	70+ years	Both sexes	Deaths	Rate (per 100k)	Staphylococcus aureus	Methicillin	Attributable	2020	10.8808	13.9825	7.77904	1.58251
Eastern Sub-Saharan Africa	70+ years	Both sexes	Deaths	Rate (per 100k)	Staphylococcus aureus	Methicillin	Attributable	2021	10.8376	14.003	7.67209	1.61503
Southern Sub-Saharan Africa	Age-standardized	Both sexes	Deaths	Rate (per 100k)	Staphylococcus aureus	Methicillin	Attributable	1990	1.12478	1.66628	0.583286	0.276275
Southern Sub-Saharan Africa	Age-standardized	Both sexes	Deaths	Rate (per 100k)	Staphylococcus aureus	Methicillin	Attributable	1991	1.15535	1.67363	0.637065	0.26443
Southern Sub-Saharan Africa	Age-standardized	Both sexes	Deaths	Rate (per 100k)	Staphylococcus aureus	Methicillin	Attributable	1992	1.19328	1.68291	0.703645	0.249812
Southern Sub-Saharan Africa	Age-standardized	Both sexes	Deaths	Rate (per 100k)	Staphylococcus aureus	Methicillin	Attributable	1993	1.18245	1.6372	0.727702	0.232016
Southern Sub-Saharan Africa	Age-standardized	Both sexes	Deaths	Rate (per 100k)	Staphylococcus aureus	Methicillin	Attributable	1994	1.22534	1.66476	0.785911	0.224196
Southern Sub-Saharan Africa	Age-standardized	Both sexes	Deaths	Rate (per 100k)	Staphylococcus aureus	Methicillin	Attributable	1995	1.22485	1.63289	0.816805	0.208185
Southern Sub-Saharan Africa	Age-standardized	Both sexes	Deaths	Rate (per 100k)	Staphylococcus aureus	Methicillin	Attributable	1996	1.32394	1.74228	0.905587	0.213443
Southern Sub-Saharan Africa	Age-standardized	Both sexes	Deaths	Rate (per 100k)	Staphylococcus aureus	Methicillin	Attributable	1997	1.43509	1.86718	1.00299	0.220456
Southern Sub-Saharan Africa	Age-standardized	Both sexes	Deaths	Rate (per 100k)	Staphylococcus aureus	Methicillin	Attributable	1998	1.47775	1.90824	1.04726	0.219638
Southern Sub-Saharan Africa	Age-standardized	Both sexes	Deaths	Rate (per 100k)	Staphylococcus aureus	Methicillin	Attributable	1999	1.4827	1.91847	1.04693	0.222333
Southern Sub-Saharan Africa	Age-standardized	Both sexes	Deaths	Rate (per 100k)	Staphylococcus aureus	Methicillin	Attributable	2000	1.5379	1.97452	1.10129	0.222761
Southern Sub-Saharan Africa	Age-standardized	Both sexes	Deaths	Rate (per 100k)	Staphylococcus aureus	Methicillin	Attributable	2001	1.55862	1.99629	1.12095	0.223301
Southern Sub-Saharan Africa	Age-standardized	Both sexes	Deaths	Rate (per 100k)	Staphylococcus aureus	Methicillin	Attributable	2002	1.63755	2.08856	1.18653	0.230109
Southern Sub-Saharan Africa	Age-standardized	Both sexes	Deaths	Rate (per 100k)	Staphylococcus aureus	Methicillin	Attributable	2003	1.70053	2.15896	1.24211	0.233891
Southern Sub-Saharan Africa	Age-standardized	Both sexes	Deaths	Rate (per 100k)	Staphylococcus aureus	Methicillin	Attributable	2004	1.7887	2.25498	1.32243	0.237896
Southern Sub-Saharan Africa	Age-standardized	Both sexes	Deaths	Rate (per 100k)	Staphylococcus aureus	Methicillin	Attributable	2005	1.87205	2.31932	1.42479	0.228196
Southern Sub-Saharan Africa	Age-standardized	Both sexes	Deaths	Rate (per 100k)	Staphylococcus aureus	Methicillin	Attributable	2006	1.94761	2.39231	1.50292	0.226884
Southern Sub-Saharan Africa	Age-standardized	Both sexes	Deaths	Rate (per 100k)	Staphylococcus aureus	Methicillin	Attributable	2007	1.97581	2.40313	1.54848	0.218023
Southern Sub-Saharan Africa	Age-standardized	Both sexes	Deaths	Rate (per 100k)	Staphylococcus aureus	Methicillin	Attributable	2008	2.12729	2.55087	1.70371	0.216111
Southern Sub-Saharan Africa	Age-standardized	Both sexes	Deaths	Rate (per 100k)	Staphylococcus aureus	Methicillin	Attributable	2009	2.16128	2.58037	1.74218	0.213825
Southern Sub-Saharan Africa	Age-standardized	Both sexes	Deaths	Rate (per 100k)	Staphylococcus aureus	Methicillin	Attributable	2010	2.52135	2.95224	2.09047	0.219841
Southern Sub-Saharan Africa	Age-standardized	Both sexes	Deaths	Rate (per 100k)	Staphylococcus aureus	Methicillin	Attributable	2011	2.57232	2.98178	2.16286	0.20891
Southern Sub-Saharan Africa	Age-standardized	Both sexes	Deaths	Rate (per 100k)	Staphylococcus aureus	Methicillin	Attributable	2012	2.61932	3.0175	2.22114	0.203153
Southern Sub-Saharan Africa	Age-standardized	Both sexes	Deaths	Rate (per 100k)	Staphylococcus aureus	Methicillin	Attributable	2013	2.5792	2.97532	2.18307	0.202104
Southern Sub-Saharan Africa	Age-standardized	Both sexes	Deaths	Rate (per 100k)	Staphylococcus aureus	Methicillin	Attributable	2014	2.46444	2.84188	2.08701	0.19257
Southern Sub-Saharan Africa	Age-standardized	Both sexes	Deaths	Rate (per 100k)	Staphylococcus aureus	Methicillin	Attributable	2015	2.19886	2.56711	1.83062	0.187882
Southern Sub-Saharan Africa	Age-standardized	Both sexes	Deaths	Rate (per 100k)	Staphylococcus aureus	Methicillin	Attributable	2016	1.99964	2.36649	1.63279	0.187168
Southern Sub-Saharan Africa	Age-standardized	Both sexes	Deaths	Rate (per 100k)	Staphylococcus aureus	Methicillin	Attributable	2017	1.9575	2.3132	1.60179	0.181482
Southern Sub-Saharan Africa	Age-standardized	Both sexes	Deaths	Rate (per 100k)	Staphylococcus aureus	Methicillin	Attributable	2018	1.86155	2.22534	1.49776	0.185608
Southern Sub-Saharan Africa	Age-standardized	Both sexes	Deaths	Rate (per 100k)	Staphylococcus aureus	Methicillin	Attributable	2019	1.7129	2.07779	1.348	0.186171
Southern Sub-Saharan Africa	Age-standardized	Both sexes	Deaths	Rate (per 100k)	Staphylococcus aureus	Methicillin	Attributable	2020	1.6026	1.9817	1.22351	0.193416
Southern Sub-Saharan Africa	Age-standardized	Both sexes	Deaths	Rate (per 100k)	Staphylococcus aureus	Methicillin	Attributable	2021	1.55307	1.93288	1.17326	0.193782
Southern Sub-Saharan Africa	Neonatal	Both sexes	Deaths	Rate (per 100k)	Staphylococcus aureus	Methicillin	Attributable	1990	63.9867	95.2907	32.6828	15.9714
Southern Sub-Saharan Africa	Neonatal	Both sexes	Deaths	Rate (per 100k)	Staphylococcus aureus	Methicillin	Attributable	1991	63.9228	96.516	31.3296	16.6292
Southern Sub-Saharan Africa	Neonatal	Both sexes	Deaths	Rate (per 100k)	Staphylococcus aureus	Methicillin	Attributable	1992	61.908	90.1592	33.6568	14.4139
Southern Sub-Saharan Africa	Neonatal	Both sexes	Deaths	Rate (per 100k)	Staphylococcus aureus	Methicillin	Attributable	1993	61.2562	88.3996	34.1128	13.8487
Southern Sub-Saharan Africa	Neonatal	Both sexes	Deaths	Rate (per 100k)	Staphylococcus aureus	Methicillin	Attributable	1994	60.1239	85.1458	35.1021	12.7662
Southern Sub-Saharan Africa	Neonatal	Both sexes	Deaths	Rate (per 100k)	Staphylococcus aureus	Methicillin	Attributable	1995	59.3364	82.3743	36.2986	11.754
Southern Sub-Saharan Africa	Neonatal	Both sexes	Deaths	Rate (per 100k)	Staphylococcus aureus	Methicillin	Attributable	1996	61.1763	86.8106	35.542	13.0787
Southern Sub-Saharan Africa	Neonatal	Both sexes	Deaths	Rate (per 100k)	Staphylococcus aureus	Methicillin	Attributable	1997	60.9098	85.9547	35.8649	12.778
Southern Sub-Saharan Africa	Neonatal	Both sexes	Deaths	Rate (per 100k)	Staphylococcus aureus	Methicillin	Attributable	1998	60.1486	82.1882	38.109	11.2447
Southern Sub-Saharan Africa	Neonatal	Both sexes	Deaths	Rate (per 100k)	Staphylococcus aureus	Methicillin	Attributable	1999	59.0267	80.3287	37.7248	10.8683
Southern Sub-Saharan Africa	Neonatal	Both sexes	Deaths	Rate (per 100k)	Staphylococcus aureus	Methicillin	Attributable	2000	57.4602	79.1406	35.7798	11.0614
Southern Sub-Saharan Africa	Neonatal	Both sexes	Deaths	Rate (per 100k)	Staphylococcus aureus	Methicillin	Attributable	2001	56.357	75.6924	37.0216	9.86499
Southern Sub-Saharan Africa	Neonatal	Both sexes	Deaths	Rate (per 100k)	Staphylococcus aureus	Methicillin	Attributable	2002	56.4036	75.0078	37.7995	9.49193
Southern Sub-Saharan Africa	Neonatal	Both sexes	Deaths	Rate (per 100k)	Staphylococcus aureus	Methicillin	Attributable	2003	55.8813	76.5629	35.1997	10.5518
Southern Sub-Saharan Africa	Neonatal	Both sexes	Deaths	Rate (per 100k)	Staphylococcus aureus	Methicillin	Attributable	2004	57.896	80.5499	35.2422	11.5581
Southern Sub-Saharan Africa	Neonatal	Both sexes	Deaths	Rate (per 100k)	Staphylococcus aureus	Methicillin	Attributable	2005	59.5751	79.6158	39.5344	10.2249
Southern Sub-Saharan Africa	Neonatal	Both sexes	Deaths	Rate (per 100k)	Staphylococcus aureus	Methicillin	Attributable	2006	60.7483	81.5548	39.9417	10.6156
Southern Sub-Saharan Africa	Neonatal	Both sexes	Deaths	Rate (per 100k)	Staphylococcus aureus	Methicillin	Attributable	2007	60.6605	79.5093	41.8118	9.6167
Southern Sub-Saharan Africa	Neonatal	Both sexes	Deaths	Rate (per 100k)	Staphylococcus aureus	Methicillin	Attributable	2008	63.0929	85.3758	40.81	11.3688
Southern Sub-Saharan Africa	Neonatal	Both sexes	Deaths	Rate (per 100k)	Staphylococcus aureus	Methicillin	Attributable	2009	62.4313	84.0624	40.8001	11.0363
Southern Sub-Saharan Africa	Neonatal	Both sexes	Deaths	Rate (per 100k)	Staphylococcus aureus	Methicillin	Attributable	2010	69.4352	90.3539	48.5164	10.6729
Southern Sub-Saharan Africa	Neonatal	Both sexes	Deaths	Rate (per 100k)	Staphylococcus aureus	Methicillin	Attributable	2011	69.9317	90.3946	49.4688	10.4403
Southern Sub-Saharan Africa	Neonatal	Both sexes	Deaths	Rate (per 100k)	Staphylococcus aureus	Methicillin	Attributable	2012	69.7065	88.3557	51.0572	9.51492
Southern Sub-Saharan Africa	Neonatal	Both sexes	Deaths	Rate (per 100k)	Staphylococcus aureus	Methicillin	Attributable	2013	67.0623	85.9103	48.2143	9.61635
Southern Sub-Saharan Africa	Neonatal	Both sexes	Deaths	Rate (per 100k)	Staphylococcus aureus	Methicillin	Attributable	2014	62.6285	79.9615	45.2955	8.84338
Southern Sub-Saharan Africa	Neonatal	Both sexes	Deaths	Rate (per 100k)	Staphylococcus aureus	Methicillin	Attributable	2015	55.4223	70.667	40.1775	7.77794
Southern Sub-Saharan Africa	Neonatal	Both sexes	Deaths	Rate (per 100k)	Staphylococcus aureus	Methicillin	Attributable	2016	50.1816	65.1381	35.225	7.63091
Southern Sub-Saharan Africa	Neonatal	Both sexes	Deaths	Rate (per 100k)	Staphylococcus aureus	Methicillin	Attributable	2017	49.1779	62.9918	35.3639	7.04793
Southern Sub-Saharan Africa	Neonatal	Both sexes	Deaths	Rate (per 100k)	Staphylococcus aureus	Methicillin	Attributable	2018	46.6549	61.8101	31.4998	7.73223
Southern Sub-Saharan Africa	Neonatal	Both sexes	Deaths	Rate (per 100k)	Staphylococcus aureus	Methicillin	Attributable	2019	43.7713	56.7802	30.7624	6.6372
Southern Sub-Saharan Africa	Neonatal	Both sexes	Deaths	Rate (per 100k)	Staphylococcus aureus	Methicillin	Attributable	2020	45.3843	60.3197	30.4489	7.62011
Southern Sub-Saharan Africa	Neonatal	Both sexes	Deaths	Rate (per 100k)	Staphylococcus aureus	Methicillin	Attributable	2021	44.1885	58.3079	30.0692	7.20375
Southern Sub-Saharan Africa	Post Neonatal to 5	Both sexes	Deaths	Rate (per 100k)	Staphylococcus aureus	Methicillin	Attributable	1990	0.74047	1.1131	0.367837	0.190119
Southern Sub-Saharan Africa	Post Neonatal to 5	Both sexes	Deaths	Rate (per 100k)	Staphylococcus aureus	Methicillin	Attributable	1991	0.732336	1.07403	0.390638	0.174336
Southern Sub-Saharan Africa	Post Neonatal to 5	Both sexes	Deaths	Rate (per 100k)	Staphylococcus aureus	Methicillin	Attributable	1992	0.707711	1.02563	0.389793	0.162204
Southern Sub-Saharan Africa	Post Neonatal to 5	Both sexes	Deaths	Rate (per 100k)	Staphylococcus aureus	Methicillin	Attributable	1993	0.693121	0.977209	0.409033	0.144943
Southern Sub-Saharan Africa	Post Neonatal to 5	Both sexes	Deaths	Rate (per 100k)	Staphylococcus aureus	Methicillin	Attributable	1994	0.679758	0.951408	0.408108	0.138597
Southern Sub-Saharan Africa	Post Neonatal to 5	Both sexes	Deaths	Rate (per 100k)	Staphylococcus aureus	Methicillin	Attributable	1995	0.662131	0.909299	0.414963	0.126106
Southern Sub-Saharan Africa	Post Neonatal to 5	Both sexes	Deaths	Rate (per 100k)	Staphylococcus aureus	Methicillin	Attributable	1996	0.666705	0.905685	0.427725	0.121929
Southern Sub-Saharan Africa	Post Neonatal to 5	Both sexes	Deaths	Rate (per 100k)	Staphylococcus aureus	Methicillin	Attributable	1997	0.662233	0.885734	0.438732	0.114031
Southern Sub-Saharan Africa	Post Neonatal to 5	Both sexes	Deaths	Rate (per 100k)	Staphylococcus aureus	Methicillin	Attributable	1998	0.673759	0.902408	0.44511	0.116658
Southern Sub-Saharan Africa	Post Neonatal to 5	Both sexes	Deaths	Rate (per 100k)	Staphylococcus aureus	Methicillin	Attributable	1999	0.701928	0.930748	0.473107	0.116745
Southern Sub-Saharan Africa	Post Neonatal to 5	Both sexes	Deaths	Rate (per 100k)	Staphylococcus aureus	Methicillin	Attributable	2000	0.727619	0.95449	0.500748	0.11575
Southern Sub-Saharan Africa	Post Neonatal to 5	Both sexes	Deaths	Rate (per 100k)	Staphylococcus aureus	Methicillin	Attributable	2001	0.7629	0.995345	0.530456	0.118594
Southern Sub-Saharan Africa	Post Neonatal to 5	Both sexes	Deaths	Rate (per 100k)	Staphylococcus aureus	Methicillin	Attributable	2002	0.813083	1.0574	0.568765	0.124652
Southern Sub-Saharan Africa	Post Neonatal to 5	Both sexes	Deaths	Rate (per 100k)	Staphylococcus aureus	Methicillin	Attributable	2003	0.844956	1.08041	0.609496	0.120132
Southern Sub-Saharan Africa	Post Neonatal to 5	Both sexes	Deaths	Rate (per 100k)	Staphylococcus aureus	Methicillin	Attributable	2004	0.901636	1.13971	0.663567	0.121464
Southern Sub-Saharan Africa	Post Neonatal to 5	Both sexes	Deaths	Rate (per 100k)	Staphylococcus aureus	Methicillin	Attributable	2005	0.950673	1.19323	0.708118	0.123752
Southern Sub-Saharan Africa	Post Neonatal to 5	Both sexes	Deaths	Rate (per 100k)	Staphylococcus aureus	Methicillin	Attributable	2006	0.94876	1.18608	0.71144	0.121082
Southern Sub-Saharan Africa	Post Neonatal to 5	Both sexes	Deaths	Rate (per 100k)	Staphylococcus aureus	Methicillin	Attributable	2007	0.927225	1.15416	0.700285	0.115786
Southern Sub-Saharan Africa	Post Neonatal to 5	Both sexes	Deaths	Rate (per 100k)	Staphylococcus aureus	Methicillin	Attributable	2008	0.960998	1.18186	0.740138	0.112684
Southern Sub-Saharan Africa	Post Neonatal to 5	Both sexes	Deaths	Rate (per 100k)	Staphylococcus aureus	Methicillin	Attributable	2009	0.938859	1.14957	0.728152	0.107504
Southern Sub-Saharan Africa	Post Neonatal to 5	Both sexes	Deaths	Rate (per 100k)	Staphylococcus aureus	Methicillin	Attributable	2010	1.0625	1.28608	0.838919	0.114071
Southern Sub-Saharan Africa	Post Neonatal to 5	Both sexes	Deaths	Rate (per 100k)	Staphylococcus aureus	Methicillin	Attributable	2011	1.09969	1.33218	0.867195	0.11862
Southern Sub-Saharan Africa	Post Neonatal to 5	Both sexes	Deaths	Rate (per 100k)	Staphylococcus aureus	Methicillin	Attributable	2012	1.11578	1.33341	0.898154	0.111035
Southern Sub-Saharan Africa	Post Neonatal to 5	Both sexes	Deaths	Rate (per 100k)	Staphylococcus aureus	Methicillin	Attributable	2013	1.07878	1.29675	0.860812	0.11121
Southern Sub-Saharan Africa	Post Neonatal to 5	Both sexes	Deaths	Rate (per 100k)	Staphylococcus aureus	Methicillin	Attributable	2014	1.01335	1.21817	0.808528	0.1045
Southern Sub-Saharan Africa	Post Neonatal to 5	Both sexes	Deaths	Rate (per 100k)	Staphylococcus aureus	Methicillin	Attributable	2015	0.896145	1.09675	0.695537	0.102351
Southern Sub-Saharan Africa	Post Neonatal to 5	Both sexes	Deaths	Rate (per 100k)	Staphylococcus aureus	Methicillin	Attributable	2016	0.801122	0.987176	0.615067	0.0949259
Southern Sub-Saharan Africa	Post Neonatal to 5	Both sexes	Deaths	Rate (per 100k)	Staphylococcus aureus	Methicillin	Attributable	2017	0.77609	0.957047	0.595134	0.0923247
Southern Sub-Saharan Africa	Post Neonatal to 5	Both sexes	Deaths	Rate (per 100k)	Staphylococcus aureus	Methicillin	Attributable	2018	0.747602	0.923172	0.572032	0.0895765
Southern Sub-Saharan Africa	Post Neonatal to 5	Both sexes	Deaths	Rate (per 100k)	Staphylococcus aureus	Methicillin	Attributable	2019	0.702021	0.870909	0.533133	0.0861675
Southern Sub-Saharan Africa	Post Neonatal to 5	Both sexes	Deaths	Rate (per 100k)	Staphylococcus aureus	Methicillin	Attributable	2020	0.506579	0.637638	0.375519	0.0668672
Southern Sub-Saharan Africa	Post Neonatal to 5	Both sexes	Deaths	Rate (per 100k)	Staphylococcus aureus	Methicillin	Attributable	2021	0.507964	0.645172	0.370757	0.0700037
Southern Sub-Saharan Africa	5 to 49	Both sexes	Deaths	Rate (per 100k)	Staphylococcus aureus	Methicillin	Attributable	1990	0.201848	0.296649	0.107046	0.0483679
Southern Sub-Saharan Africa	5 to 49	Both sexes	Deaths	Rate (per 100k)	Staphylococcus aureus	Methicillin	Attributable	1991	0.204665	0.292752	0.116579	0.0449422
Southern Sub-Saharan Africa	5 to 49	Both sexes	Deaths	Rate (per 100k)	Staphylococcus aureus	Methicillin	Attributable	1992	0.214629	0.300625	0.128634	0.0438754
Southern Sub-Saharan Africa	5 to 49	Both sexes	Deaths	Rate (per 100k)	Staphylococcus aureus	Methicillin	Attributable	1993	0.193642	0.266599	0.120685	0.0372229
Southern Sub-Saharan Africa	5 to 49	Both sexes	Deaths	Rate (per 100k)	Staphylococcus aureus	Methicillin	Attributable	1994	0.192631	0.260242	0.125019	0.0344958
Southern Sub-Saharan Africa	5 to 49	Both sexes	Deaths	Rate (per 100k)	Staphylococcus aureus	Methicillin	Attributable	1995	0.176302	0.23522	0.117385	0.0300599
Southern Sub-Saharan Africa	5 to 49	Both sexes	Deaths	Rate (per 100k)	Staphylococcus aureus	Methicillin	Attributable	1996	0.165335	0.218662	0.112009	0.0272075
Southern Sub-Saharan Africa	5 to 49	Both sexes	Deaths	Rate (per 100k)	Staphylococcus aureus	Methicillin	Attributable	1997	0.173254	0.226417	0.120091	0.0271242
Southern Sub-Saharan Africa	5 to 49	Both sexes	Deaths	Rate (per 100k)	Staphylococcus aureus	Methicillin	Attributable	1998	0.180341	0.233448	0.127234	0.0270953
Southern Sub-Saharan Africa	5 to 49	Both sexes	Deaths	Rate (per 100k)	Staphylococcus aureus	Methicillin	Attributable	1999	0.189003	0.246285	0.131722	0.0292254
Southern Sub-Saharan Africa	5 to 49	Both sexes	Deaths	Rate (per 100k)	Staphylococcus aureus	Methicillin	Attributable	2000	0.216954	0.28252	0.151388	0.033452
Southern Sub-Saharan Africa	5 to 49	Both sexes	Deaths	Rate (per 100k)	Staphylococcus aureus	Methicillin	Attributable	2001	0.232948	0.301615	0.164282	0.035034
Southern Sub-Saharan Africa	5 to 49	Both sexes	Deaths	Rate (per 100k)	Staphylococcus aureus	Methicillin	Attributable	2002	0.267019	0.344349	0.189688	0.0394542
Southern Sub-Saharan Africa	5 to 49	Both sexes	Deaths	Rate (per 100k)	Staphylococcus aureus	Methicillin	Attributable	2003	0.299938	0.382109	0.217768	0.0419235
Southern Sub-Saharan Africa	5 to 49	Both sexes	Deaths	Rate (per 100k)	Staphylococcus aureus	Methicillin	Attributable	2004	0.332295	0.421054	0.243535	0.0452854
Southern Sub-Saharan Africa	5 to 49	Both sexes	Deaths	Rate (per 100k)	Staphylococcus aureus	Methicillin	Attributable	2005	0.343625	0.427976	0.259274	0.0430364
Southern Sub-Saharan Africa	5 to 49	Both sexes	Deaths	Rate (per 100k)	Staphylococcus aureus	Methicillin	Attributable	2006	0.347058	0.427877	0.26624	0.0412342
Southern Sub-Saharan Africa	5 to 49	Both sexes	Deaths	Rate (per 100k)	Staphylococcus aureus	Methicillin	Attributable	2007	0.336565	0.412377	0.260754	0.0386793
Southern Sub-Saharan Africa	5 to 49	Both sexes	Deaths	Rate (per 100k)	Staphylococcus aureus	Methicillin	Attributable	2008	0.352025	0.424792	0.279258	0.0371259
Southern Sub-Saharan Africa	5 to 49	Both sexes	Deaths	Rate (per 100k)	Staphylococcus aureus	Methicillin	Attributable	2009	0.343056	0.415063	0.27105	0.0367381
Southern Sub-Saharan Africa	5 to 49	Both sexes	Deaths	Rate (per 100k)	Staphylococcus aureus	Methicillin	Attributable	2010	0.379096	0.449437	0.308756	0.0358881
Southern Sub-Saharan Africa	5 to 49	Both sexes	Deaths	Rate (per 100k)	Staphylococcus aureus	Methicillin	Attributable	2011	0.369531	0.435681	0.303382	0.0337499
Southern Sub-Saharan Africa	5 to 49	Both sexes	Deaths	Rate (per 100k)	Staphylococcus aureus	Methicillin	Attributable	2012	0.369329	0.430518	0.30814	0.0312189
Southern Sub-Saharan Africa	5 to 49	Both sexes	Deaths	Rate (per 100k)	Staphylococcus aureus	Methicillin	Attributable	2013	0.353385	0.414527	0.292243	0.031195
Southern Sub-Saharan Africa	5 to 49	Both sexes	Deaths	Rate (per 100k)	Staphylococcus aureus	Methicillin	Attributable	2014	0.331297	0.386242	0.276352	0.0280332
Southern Sub-Saharan Africa	5 to 49	Both sexes	Deaths	Rate (per 100k)	Staphylococcus aureus	Methicillin	Attributable	2015	0.293469	0.347679	0.239259	0.0276581
Southern Sub-Saharan Africa	5 to 49	Both sexes	Deaths	Rate (per 100k)	Staphylococcus aureus	Methicillin	Attributable	2016	0.271321	0.323686	0.218956	0.0267168
Southern Sub-Saharan Africa	5 to 49	Both sexes	Deaths	Rate (per 100k)	Staphylococcus aureus	Methicillin	Attributable	2017	0.271812	0.323723	0.219901	0.0264851
Southern Sub-Saharan Africa	5 to 49	Both sexes	Deaths	Rate (per 100k)	Staphylococcus aureus	Methicillin	Attributable	2018	0.269476	0.323483	0.215468	0.0275549
Southern Sub-Saharan Africa	5 to 49	Both sexes	Deaths	Rate (per 100k)	Staphylococcus aureus	Methicillin	Attributable	2019	0.270499	0.327677	0.213321	0.0291724
Southern Sub-Saharan Africa	5 to 49	Both sexes	Deaths	Rate (per 100k)	Staphylococcus aureus	Methicillin	Attributable	2020	0.258229	0.31949	0.196967	0.0312561
Southern Sub-Saharan Africa	5 to 49	Both sexes	Deaths	Rate (per 100k)	Staphylococcus aureus	Methicillin	Attributable	2021	0.262018	0.325493	0.198544	0.0323851
Southern Sub-Saharan Africa	50-69 years	Both sexes	Deaths	Rate (per 100k)	Staphylococcus aureus	Methicillin	Attributable	1990	1.5402	2.31286	0.767545	0.394214
Southern Sub-Saharan Africa	50-69 years	Both sexes	Deaths	Rate (per 100k)	Staphylococcus aureus	Methicillin	Attributable	1991	1.59161	2.34354	0.839678	0.383639
Southern Sub-Saharan Africa	50-69 years	Both sexes	Deaths	Rate (per 100k)	Staphylococcus aureus	Methicillin	Attributable	1992	1.65825	2.3746	0.941894	0.365487
Southern Sub-Saharan Africa	50-69 years	Both sexes	Deaths	Rate (per 100k)	Staphylococcus aureus	Methicillin	Attributable	1993	1.66087	2.3308	0.990944	0.341801
Southern Sub-Saharan Africa	50-69 years	Both sexes	Deaths	Rate (per 100k)	Staphylococcus aureus	Methicillin	Attributable	1994	1.76282	2.42002	1.10562	0.335305
Southern Sub-Saharan Africa	50-69 years	Both sexes	Deaths	Rate (per 100k)	Staphylococcus aureus	Methicillin	Attributable	1995	1.80044	2.41598	1.1849	0.314051
Southern Sub-Saharan Africa	50-69 years	Both sexes	Deaths	Rate (per 100k)	Staphylococcus aureus	Methicillin	Attributable	1996	2.02213	2.68309	1.36116	0.337228
Southern Sub-Saharan Africa	50-69 years	Both sexes	Deaths	Rate (per 100k)	Staphylococcus aureus	Methicillin	Attributable	1997	2.27047	2.95406	1.58688	0.348768
Southern Sub-Saharan Africa	50-69 years	Both sexes	Deaths	Rate (per 100k)	Staphylococcus aureus	Methicillin	Attributable	1998	2.34933	3.03211	1.66655	0.348355
Southern Sub-Saharan Africa	50-69 years	Both sexes	Deaths	Rate (per 100k)	Staphylococcus aureus	Methicillin	Attributable	1999	2.31411	3.00782	1.62039	0.353935
Southern Sub-Saharan Africa	50-69 years	Both sexes	Deaths	Rate (per 100k)	Staphylococcus aureus	Methicillin	Attributable	2000	2.39588	3.09236	1.6994	0.355347
Southern Sub-Saharan Africa	50-69 years	Both sexes	Deaths	Rate (per 100k)	Staphylococcus aureus	Methicillin	Attributable	2001	2.37019	3.06489	1.67548	0.354441
Southern Sub-Saharan Africa	50-69 years	Both sexes	Deaths	Rate (per 100k)	Staphylococcus aureus	Methicillin	Attributable	2002	2.46924	3.16543	1.77306	0.355195
Southern Sub-Saharan Africa	50-69 years	Both sexes	Deaths	Rate (per 100k)	Staphylococcus aureus	Methicillin	Attributable	2003	2.55856	3.25513	1.86199	0.355391
Southern Sub-Saharan Africa	50-69 years	Both sexes	Deaths	Rate (per 100k)	Staphylococcus aureus	Methicillin	Attributable	2004	2.70927	3.45497	1.96356	0.380462
Southern Sub-Saharan Africa	50-69 years	Both sexes	Deaths	Rate (per 100k)	Staphylococcus aureus	Methicillin	Attributable	2005	2.88949	3.62021	2.15878	0.372814
Southern Sub-Saharan Africa	50-69 years	Both sexes	Deaths	Rate (per 100k)	Staphylococcus aureus	Methicillin	Attributable	2006	3.06526	3.78957	2.34094	0.369548
Southern Sub-Saharan Africa	50-69 years	Both sexes	Deaths	Rate (per 100k)	Staphylococcus aureus	Methicillin	Attributable	2007	3.14016	3.81647	2.46386	0.345054
Southern Sub-Saharan Africa	50-69 years	Both sexes	Deaths	Rate (per 100k)	Staphylococcus aureus	Methicillin	Attributable	2008	3.42592	4.13007	2.72177	0.359259
Southern Sub-Saharan Africa	50-69 years	Both sexes	Deaths	Rate (per 100k)	Staphylococcus aureus	Methicillin	Attributable	2009	3.51057	4.1913	2.82984	0.347312
Southern Sub-Saharan Africa	50-69 years	Both sexes	Deaths	Rate (per 100k)	Staphylococcus aureus	Methicillin	Attributable	2010	4.08906	4.79037	3.38775	0.35781
Southern Sub-Saharan Africa	50-69 years	Both sexes	Deaths	Rate (per 100k)	Staphylococcus aureus	Methicillin	Attributable	2011	4.16373	4.8049	3.52257	0.327125
Southern Sub-Saharan Africa	50-69 years	Both sexes	Deaths	Rate (per 100k)	Staphylococcus aureus	Methicillin	Attributable	2012	4.23877	4.90526	3.57227	0.340049
Southern Sub-Saharan Africa	50-69 years	Both sexes	Deaths	Rate (per 100k)	Staphylococcus aureus	Methicillin	Attributable	2013	4.18767	4.87066	3.50469	0.348462
Southern Sub-Saharan Africa	50-69 years	Both sexes	Deaths	Rate (per 100k)	Staphylococcus aureus	Methicillin	Attributable	2014	4.04493	4.64288	3.44699	0.305075
Southern Sub-Saharan Africa	50-69 years	Both sexes	Deaths	Rate (per 100k)	Staphylococcus aureus	Methicillin	Attributable	2015	3.64778	4.25171	3.04384	0.30813
[truncated: 3,462 more rows]

## Sheet: % Resistance of MRSA
Country	Year	% Resistance of MRSA	lower CI	Upper CI
[truncated: 1,206 more rows]

[truncated: 3 more sheets: Antibiotic consumption, Social Determinants of Health, Forecast]
